# Supplementary material for: A Proposed Explainable Artificial Intelligence-Based Machine Learning Model for Discriminative Metabolites for Myalgic Encephalomyelitis/Chronic Fatigue Syndrome
Source: Preprints.org preprint supplement (doi:10.20944/preprints202307.1585.v1), 2023-07-25
Supplement: Supplementary file 1 [file supplementary]

## Sheet: OrigScale CLP
PATHWAY_SORTORDER	BIOCHEMICAL	SUPER_PATHWAY	SUB_PATHWAY	COMP_ID	PLATFORM	CHEMICAL_ID	KEGG	Group HMDB_ID	C1	C2	C3	C4	C5	C6	C7	C8	C9	C10	C11	C12	C13	C14	C15	C16	C17	C18	C19	C20	C21	C22	C23	C24	C25	C26	P1	P2	P3	P4	P5	P6	P7	P8	P9	P10	P11	P12	P13	P14	P15
7721	CE(12:0)	Cholesterol Ester	CE Ester	54493	DMS-MS	100010641		HMDB02262	1.042	0.7834	0.3761	1.5656	0.378	2.624	1.6049	0.4403	0.5983	0.6126	0.6033	2.0346	1.0095	0.2775	0.3675	0.5672	0.6992	0.951	1.7632	0.2546	0.4189	0.0827	0.1669	0.917	0.6577	0.7032	1.0677	0.6863	0.6429	0.2904	0.5889	2.4485	2.1582	0.3379	0.1821	1.0355	0.54	1.3359	5.3029	0.7436	0.5623
7722	CE(14:0)	Cholesterol Ester	CE Ester	53452	DMS-MS	100009600		HMDB06725	38.6209	23.1493	18.5954	22.5714	17.0352	18.47	17.8466	19.3958	19.1634	26.585	22.0975	16.6636	20.8643	14.5955	11.6201	32.9347	10.1974	21.8587	34.5086	8.2466	16.363	4.0274	6.0526	21.6575	14.9233	11.0074	41.2773	19.52	22.1725	11.3919	21.1505	35.684	25.8223	14.698	12.7623	24.943	22.7031	50.2228	28.2368	17.5685	25.2198
7723	CE(14:1)	Cholesterol Ester	CE Ester	53453	DMS-MS	100009601		HMDB10367	2.7632	0.9916	0.9467	1.2766	0.9841	0.4656	0.8983	1.0098	0.89	1.6849	1.1828	0.5146	0.9686	0.8179	0.5602	1.4354	0.2431	2.0248	1.5643	0.3968	0.9199	0.2155	0.3837	1.902	0.869	0.3318	2.8708	0.9783	0.9126	0.4656	0.9104	2.7669	0.7062	0.8133	0.5669	1.3246	2.291	3.7716	0.7795	0.9537	1.7271
7724	CE(15:0)	Cholesterol Ester	CE Ester	53454	DMS-MS	100009602		HMDB60057	8.9593	7.1359	6.2465	7.0701	5.3056	4.7195	5.5427	5.915	8.0916	6.4593	8.6595	2.3273	5.1726	4.5	3.2435	9.2735	3.1442	3.9908	9.9798	3.4516	5.1616	2.326	2.5651	4.5341	5.3888	4.1573	13.1638	7.8338	8.1313	3.9695	6.8909	7.0744	4.1854	4.5259	2.3453	7.2994	7.3334	12.6304	4.7317	6.1884	9.2356
7725	CE(16:0)	Cholesterol Ester	CE Ester	54315	DMS-MS	100010463	C11251	HMDB00885	394.199	303.344	263.783	301.353	228.533	236.81	219.839	219.601	267.34	274.983	270.965	135.626	218.974	186.055	179.589	351.203	232.748	209.235	364.105	216.99	225.588	128.914	122.206	243.81	223.939	222.743	402.38	330.752	257.151	236.517	230.714	299.37	241.757	225.026	180.694	276.185	271.038	369.9	271.136	272.513	311.253
7726	CE(16:1)	Cholesterol Ester	CE Ester	54316	DMS-MS	100010464		HMDB00658	162.117	69.6506	82.7644	85.438	88.8199	54.3405	55.9545	68.2565	51.8471	103.875	65.3923	52.7207	80.2443	65.1934	51.8114	97.9909	27.4616	140.503	95.0432	42.087	63.5424	26.0611	35.7832	163.549	58.2839	33.1293	168.744	89.8436	56.2372	67.3156	81.3815	216.073	68.5977	80.0067	69.253	62.5246	173.691	171.702	56.1352	61.6668	137.733
7727	CE(17:0)	Cholesterol Ester	CE Ester	54122	DMS-MS	100010270		HMDB60059	8.1396	7.0118	5.9472	7.8763	5.1592	4.8673	4.8359	5.6267	10.3988	4.9319	7.4729	2.0871	5.0136	4.9345	3.7593	8.4395	3.8058	5.5399	9.6532	3.3659	5.3674	2.3684	2.6517	5.393	6.2431	3.6854	11.266	9.3693	8.5949	3.6917	6.15	5.1139	3.7439	3.9865	3.4441	6.9915	7.9183	12.6587	5.6311	6.2528	8.2665
7728	CE(18:0)	Cholesterol Ester	CE Ester	54123	DMS-MS	100010271		HMDB10368	48.2235	34.6973	36.3324	45.3192	24.7727	28.1715	27.354	30.06	37.8708	26.91	31.7254	14.9436	26.6901	20.4322	21.9526	40.9465	27.1206	26.8656	45.7012	24.5083	28.6072	13.7146	15.1956	28.1684	33.1518	27.6996	50.2934	52.9787	32.6769	28.9094	29.0259	33.1098	25.2224	28.7137	17.8823	34.9388	47.4961	52.1415	40.4777	39.5765	41.0317
7729	CE(18:1)	Cholesterol Ester	CE Ester	54494	DMS-MS	100010642		HMDB00918	510.021	403.263	390.099	449.325	282.487	321.673	312.588	317.2	365.286	344.153	332.808	214.519	326.12	240.717	264.271	449.361	328.841	356.88	480.42	319.131	312.969	161.658	172.963	356.638	312.788	361.781	580.167	510.726	360.746	354.538	328.184	414.346	334.8	312.561	275.662	384.905	469.753	550.094	408.31	401.553	455.175
7730	CE(18:2)	Cholesterol Ester	CE Ester	53968	DMS-MS	100010116	C15441	HMDB00610	851.159	637.597	587.255	697.137	493.452	505.161	529.037	530.23	633.321	566.879	583.691	436.352	535.158	477.705	524.722	753.347	566.511	655.864	812.366	574.821	526.625	339.331	355.836	644.461	550.85	607.666	894.814	730.299	537.078	555.223	531.311	688.172	580.414	591.177	536.824	739.166	626.932	772.637	753.803	641.939	718.615
7731	CE(18:3)	Cholesterol Ester	CE Ester	53969	DMS-MS	100010117		HMDB10370	90.6704	53.304	43.2591	50.3582	31.3992	23.7489	29.6052	46.9838	43.1703	42.8137	53.5682	29.8447	36.2041	35.6855	30.1251	82.1634	37.1325	62.4652	91.1078	39.1019	38.1632	10.4339	15.1158	44.2417	36.4406	26.3844	104.169	39.4713	29.5457	44.4476	25.9137	81.1421	51.9548	39.4257	45.9178	53.1619	90.3841	106.075	33.4034	48.9101	58.5357
7732	CE(18:4)	Cholesterol Ester	CE Ester	53623	DMS-MS	100009771			2.6914	1.3403	0.9533	1.1208	1.0149	0.3721	0.6316	1.0913	0.7453	1.3205	1.2809	0.5413	0.9747	1.243	0.7127	2.6432	1.0271	2.3819	1.866	0.9153	1.0108	0.1385	0.1547	1.0441	0.7188	0.3429	2.7374	0.4354	0.6772	1.1011	0.3481	2.3561	1.0953	0.9376	1.3342	1.2108	2.2721	4.5951	0.5922	0.8384	1.0536
7733	CE(20:0)	Cholesterol Ester	CE Ester	54317	DMS-MS	100010465		HMDB06740	1.1481	0.6895	0.5846	1.0267	0.5972	0.6185	0.756	0.9906	0.8983	0.8301	0.571	0.3958	0.4637	0.4285	0.5114	0.9861	0.5789	0.6337	0.9357	0.7025	0.7297	0.3351	0.2162	0.9243	0.8146	0.5548	1.1975	0.8758	0.6115	0.5631	0.9419	0.5498	0.7176	0.6188	0.5585	0.681	0.7549	1.0629	1.1416	0.7365	0.8167
7734	CE(20:1)	Cholesterol Ester	CE Ester	54318	DMS-MS	100010466		HMDB05193	0.9852	0.6819	0.8098	1.0393	0.6933	0.7657	0.7045	0.8117	0.8409	0.6873	0.8519	0.4997	0.6675	0.6703	0.611	0.8669	0.8626	0.5162	0.9914	0.7255	0.7309	0.425	0.5782	0.6175	0.7508	0.8039	0.9171	0.9946	0.7039	0.7355	1.0982	0.6871	0.8256	0.7204	0.6792	0.7795	0.8061	1.1118	1.0637	0.8709	0.8845
7735	CE(20:2)	Cholesterol Ester	CE Ester	53624	DMS-MS	100009772			2.483	1.6005	1.7877	1.9898	1.6618	1.2316	1.0891	1.518	1.3716	1.46	1.5258	1.0532	1.0471	1.1588	0.9599	1.9013	0.9186	0.9352	2.1144	1.1121	1.3469	0.9059	0.656	2.0427	1.0803	1.0362	2.5073	1.8932	1.1727	1.1539	1.4094	2.2661	1.7627	1.5256	0.8331	1.3053	2.1885	2.2365	1.6999	1.5518	2.0398
7736	CE(20:3)	Cholesterol Ester	CE Ester	54319	DMS-MS	100010467		HMDB06736	43.2992	29.1699	29.2068	32.5424	26.9532	17.997	15.4455	24.8967	22.5537	23.7779	27.2885	12.5176	12.4696	16.5927	12.2332	37.1278	12.7969	15.0074	38.212	14.4257	19.2083	12.9811	7.6757	24.0081	15.4489	15.1563	49.864	33.8015	18.023	17.5752	16.5941	43.4632	28.9719	24.1525	18.0232	23.1048	35.2834	38.7858	27.7403	26.5612	34.8469
7737	CE(20:4)	Cholesterol Ester	CE Ester	54495	DMS-MS	100010643		HMDB06726	206.213	215.518	168.69	196.867	127.268	136.717	120.54	167.51	173.763	166.411	174.963	56.6189	96.0385	112.791	100.742	238.453	109.827	104.316	271.116	135.635	109.09	106.922	58.201	99.1565	116.896	107.752	231.753	226.604	133.519	128.727	93.3626	180.256	166.216	107.058	161.516	185.02	180.669	198.085	188.275	182.265	182.458
7738	CE(20:5)	Cholesterol Ester	CE Ester	53795	DMS-MS	100009943		HMDB06731	44.5783	22.1836	23.616	23.7606	17.5028	18.3822	15.1107	29.4154	24.4355	20.1369	25.1318	4.729	17.2046	15.1746	7.6195	75.5862	51.4662	13.2102	62.5951	13.9606	58.4925	6.2801	4.4962	5.8224	9.2946	8.8421	37.2448	13.1975	25.8375	15.2069	7.0237	28.0522	19.0247	18.151	14.6156	30.7329	30.5989	68.425	27.6041	15.435	17.6743
7739	CE(22:0)	Cholesterol Ester	CE Ester	53625	DMS-MS	100009773		HMDB06727	1.1644	0.583	0.6667	0.7931	0.6465	0.591	0.487	0.6772	0.7595	0.4597	0.5619	0.3443	0.5088	0.4586	0.5026	0.7143	0.6096	0.5145	0.7488	0.5985	0.6653	0.2261	0.172	0.4063	0.4119	0.4461	0.872	0.8951	0.4893	0.5266	0.468	0.6525	0.5382	0.5578	0.3614	0.8404	0.5752	1.0554	0.7507	0.5839	0.9274
7740	CE(22:1)	Cholesterol Ester	CE Ester	53796	DMS-MS	100009944		HMDB10372	0.2801	0.209	0.1935	0.286	0.1607	0.1762	0.1888	0.1727	0.2494	0.132	0.1834	0.1321	0.2076	0.1747	0.1629	0.2843	0.301	0.2399	0.3221	0.2416	0.1442	0.0746	0.0688	0.1206	0.125	0.1973	0.2565	0.2656	0.1667	0.1618	0.2026	0.1885	0.1874	0.1513	0.1434	0.2644	0.271	0.3578	0.185	0.1969	0.209
7741	CE(22:2)	Cholesterol Ester	CE Ester	53269	DMS-MS	100009417		HMDB06737	0.2187	0.1455	0.123	0.2122	0.1063	0.1345	0.1536	0.1542	0.1546	0.1387	0.1536	0.0972	0.0819	0.1027	0.0897	0.2428	0.1454	0.1003	0.233	0.1434	0.1384	0.1109	0.0603	0.0951	0.0995	0.1023	0.2061	0.1881	0.1261	0.1196	0.1697	0.1404	0.1961	0.1611	0.158	0.1684	0.1703	0.1918	0.159	0.1349	0.1599
7742	CE(22:4)	Cholesterol Ester	CE Ester	54124	DMS-MS	100010272		HMDB06729	0.3844	0.4284	0.3987	0.4336	0.2829	0.286	0.2571	0.3205	0.3665	0.3378	0.4026	0.1767	0.2735	0.3293	0.2352	0.3521	0.233	0.2961	0.5379	0.294	0.2204	0.2694	0.148	0.2941	0.2635	0.255	0.4356	0.5152	0.2882	0.2864	0.2744	0.4058	0.3039	0.2041	0.2699	0.3777	0.4913	0.5115	0.3704	0.3944	0.4432
7743	CE(22:5)	Cholesterol Ester	CE Ester	53797	DMS-MS	100009945		HMDB10375	3.1489	3.0104	2.2205	2.676	1.6046	1.4642	1.4291	1.7321	2.2084	2.4045	2.1254	0.8025	1.3434	1.6167	1.2409	2.749	2.1649	1.2326	3.4998	1.2765	1.9687	1.2125	0.9145	1.7817	1.6321	1.9128	2.8988	2.4957	1.6499	1.3758	1.2308	2.4448	1.7366	1.7024	1.6557	2.148	2.5406	3.6793	2.5094	2.1646	2.3594
7744	CE(22:6)	Cholesterol Ester	CE Ester	53970	DMS-MS	100010118		HMDB06733	29.3613	19.3899	13.3062	16.8417	10.1491	13.8074	10.0091	9.9092	16.1562	14.7652	11.8586	3.3255	9.1812	9.2577	9.189	25.608	25.5867	4.8381	25.108	7.2586	16.208	7.6686	5.4588	12.3572	13.0802	13.3243	17.6407	12.1412	12.0151	12.3347	8.6293	15.4823	14.6556	17.7439	11.8015	12.9222	12.7059	26.419	18.3329	12.703	12.5522
7745	CE(24:0)	Cholesterol Ester	CE Ester	54125	DMS-MS	100010273		HMDB10376	0.2446	0.1751	0.1542	0.2093	0.1189	0.1512	0.145	0.1383	0.169	0.1421	0.1436	0.0813	0.114	0.1052	0.1223	0.2157	0.1439	0.1441	0.2445	0.151	0.1399	0.0709	0.0534	0.1239	0.1251	0.136	0.2312	0.2063	0.1414	0.1277	0.1512	0.1608	0.1552	0.1458	0.1615	0.1836	0.1999	0.237	0.1562	0.1588	0.1918
7746	CE(24:1)	Cholesterol Ester	CE Ester	54126	DMS-MS	100010274		HMDB06728	0.1761	0.1093	0.1294	0.1328	0.1056	0.131	0.1109	0.1224	0.1203	0.1	0.1407	0.0753	0.1303	0.1147	0.0937	0.1516	0.1159	0.1157	0.197	0.1177	0.121	0.0673	0.0532	0.1052	0.1064	0.1238	0.1949	0.1883	0.115	0.11	0.1694	0.1355	0.111	0.1076	0.1239	0.1467	0.1652	0.1784	0.1248	0.1269	0.1661
7747	CER(14:0)	Sphingolipids	Ceramide	54496	DMS-MS	100010644	C13916	HMDB11773	0.0176	0.0171	0.0148	0.018	0.0122	0.0115	0.0198	0.0185	0.0156	0.0142	0.0179	0.0159	0.0139	0.0132	0.0123	0.0162	0.0118	0.0162	0.0209	0.0094	0.0116	0.0084	0.0074	0.0162	0.0141	0.0142	0.0196	0.0155	0.0145	0.0138	0.0114	0.0162	0.0169	0.0123	0.0089	0.0165	0.0177	0.0186	0.0242	0.0167	0.0146
7748	CER(16:0)	Sphingolipids	Ceramide	53971	DMS-MS	100010119		HMDB04949	0.3618	0.3245	0.2633	0.3599	0.2015	0.2206	0.2903	0.2542	0.3431	0.2572	0.3264	0.1925	0.2263	0.1799	0.2174	0.2888	0.2106	0.3166	0.4191	0.23	0.1916	0.2485	0.1658	0.319	0.2523	0.2939	0.4332	0.4332	0.2537	0.3081	0.2418	0.2708	0.2711	0.2981	0.1532	0.3406	0.372	0.3682	0.337	0.2788	0.354
7749	CER(18:0)	Sphingolipids	Ceramide	54320	DMS-MS	100010468		HMDB04950	0.0962	0.0842	0.0604	0.0709	0.0648	0.0521	0.0625	0.0787	0.0831	0.0657	0.088	0.0423	0.0592	0.0573	0.0366	0.0902	0.0314	0.1143	0.1226	0.0392	0.0548	0.0736	0.0509	0.0736	0.0591	0.1052	0.1693	0.1515	0.0627	0.0727	0.0746	0.1025	0.0623	0.1432	0.0604	0.0701	0.0921	0.1265	0.0785	0.0668	0.141
7751	CER(18:1)	Sphingolipids	Ceramide	53626	DMS-MS	100009774		HMDB04948	0.0073	0.0068	0.006	0.0079	0.0045	0.0051	0.0052	0.0057	0.0087	0.0042	0.008	0.004	0.0051	0.0043	0.0057	0.006	0.0038	0.0067	0.0084	0.0046	0.004	0.0053	0.0047	0.0072	0.0056	0.0071	0.0102	0.0096	0.0055	0.0064	0.0062	0.0059	0.0038	0.0066	0.0039	0.0081	0.0083	0.0084	0.007	0.0062	0.0118
7752	CER(20:0)	Sphingolipids	Ceramide	54321	DMS-MS	100010469		HMDB04951	0.0997	0.0822	0.0625	0.0785	0.0682	0.0552	0.0883	0.0818	0.0799	0.0501	0.092	0.0527	0.0633	0.0557	0.0502	0.0775	0.0396	0.1047	0.1233	0.0603	0.0555	0.0476	0.0428	0.0661	0.06	0.1304	0.1312	0.1188	0.0679	0.0866	0.0803	0.0893	0.0866	0.1091	0.0644	0.0772	0.1118	0.1148	0.0836	0.0689	0.1234
7753	CER(20:1)	Sphingolipids	Ceramide	53972	DMS-MS	100010120			0.0081	0.0084	0.0088	0.0084	0.0078	0.0077	0.0105	0.0091	0.0075	0.0075	0.0081	0.0074	0.01	0.0095	0.0078	0.0082	0.0073	0.009	0.0112	0.0074	0.0078	0.01	0.01	0.0087	0.008	0.0091	0.0109	0.0124	0.0116	0.0095	0.0085	0.0084	0.0074	0.0087	0.0055	0.0104	0.0106	0.0087	0.0097	0.0099	0.0112
7754	CER(22:0)	Sphingolipids	Ceramide	53627	DMS-MS	100009775		HMDB04952	0.8753	0.6355	0.4908	0.7657	0.6268	0.4338	0.8251	0.5774	0.6824	0.3288	0.6986	0.4908	0.4138	0.3313	0.4621	0.8467	0.3771	0.6268	1.0923	0.612	0.4319	0.2654	0.27	0.3826	0.5779	0.7898	1.0663	0.8675	0.4701	0.5407	0.5133	0.6168	0.8135	0.8503	0.388	0.8593	0.8339	0.8462	0.6493	0.5988	0.9102
7755	CER(22:1)	Sphingolipids	Ceramide	54127	DMS-MS	100010275		HMDB11775	0.0431	0.0337	0.0301	0.0283	0.0283	0.0273	0.0276	0.032	0.0368	0.024	0.0347	0.0237	0.0248	0.0243	0.0196	0.0428	0.0256	0.0372	0.0517	0.0248	0.0255	0.0238	0.0211	0.0298	0.0291	0.0344	0.0506	0.0441	0.0257	0.0259	0.0334	0.0337	0.0212	0.0374	0.0222	0.0379	0.0404	0.0413	0.0302	0.0331	0.051
7756	CER(24:0)	Sphingolipids	Ceramide	54322	DMS-MS	100010470		HMDB04956	3.3276	2.1604	1.9956	2.6491	1.9955	1.8506	2.4942	2.2986	2.5078	1.2812	2.1271	2.245	1.4709	1.2712	1.6821	2.9659	1.3627	2.3102	4.0614	2.2252	1.7526	0.7805	0.8339	1.1512	2.0389	2.4389	3.3204	3.0855	1.6361	1.8841	2.0215	1.9636	2.5044	2.3318	1.5617	3.139	2.5077	2.8974	2.7034	2.0555	2.7544
7757	CER(24:1)	Sphingolipids	Ceramide	53628	DMS-MS	100009776		HMDB04953	1.0934	0.8579	0.5857	0.7093	0.6736	0.6616	0.5567	0.743	0.8092	0.5228	0.691	0.5685	0.5797	0.5466	0.558	1.2398	0.567	0.8455	1.1396	0.5127	0.4586	0.4584	0.3308	0.4531	0.5335	0.9295	1.4105	1.0106	0.6121	0.8141	0.8586	0.7581	0.5931	0.8461	0.6638	0.8735	0.8869	1.1721	0.6657	0.6726	1.2336
7758	CER(26:0)	Sphingolipids	Ceramide	54497	DMS-MS	100010645		HMDB04955	0.074	0.0683	0.0391	0.0512	0.0336	0.0371	0.0388	0.0442	0.0562	0.037	0.0323	0.0358	0.0342	0.0288	0.0305	0.0538	0.0305	0.0571	0.0944	0.0385	0.0333	0.0208	0.0217	0.0242	0.0381	0.0448	0.0575	0.0529	0.0345	0.0375	0.0398	0.0487	0.0443	0.0433	0.0242	0.0609	0.0462	0.0418	0.0464	0.0488	0.0584
7759	CER(26:1)	Sphingolipids	Ceramide	53798	DMS-MS	100009946		HMDB04955	0.0306	0.0231	0.0169	0.0193	0.0227	0.016	0.0154	0.0201	0.0221	0.0195	0.018	0.0183	0.0208	0.0174	0.0151	0.0319	0.0166	0.026	0.0383	0.0153	0.0141	0.0096	0.0098	0.0163	0.0174	0.0151	0.0298	0.028	0.0163	0.0208	0.0203	0.0206	0.0183	0.022	0.0169	0.024	0.0218	0.0312	0.0253	0.0193	0.0293
7814	DAG(12:0/16:0)	Diacylglycerol	DAG Ester	53629	DMS-MS	100009777			0.1324	0.0516	0.1505	0.1716	0.0536	0.0705	0.1398	0.0692	0.0938	0.0526	0.0734	0.0801	0.0504	0.1038	0.1931	0.0847	0.0583	1.039	0.1537	0.222	0.0558	0.0312	0.0505	0.1438	0.1361	0.1381	0.0902	0.1445	0.1509	0.1515	0.1362	0.169	0.115	0.0681	0.069	0.0621	0.057	0.1399	0.4946	0.1264	0.09
7816	DAG(12:0/18:0)	Diacylglycerol	DAG Ester	53973	DMS-MS	100010121			0.0347	0.0235	0.0191	0.0286	0.0152	0.0156	0.029	0.0131	0.0149	0.0183	0.0224	0.0118	0.0144	0.0155	0.0229	0.0291	0.0143	0.2675	0.0212	0.0102	0.0142	0.0098	0.009	0.0336	0.0243	0.01	0.0238	0.0311	0.0217	0.0127	0.0136	0.0357	0.0275	0.0109	0.0092	0.0146	0.0156	0.0198	0.2679	0.0276	0.0276
7817	DAG(12:0/18:1)	Diacylglycerol	DAG Ester	53799	DMS-MS	100009947			0.1128	0.1113	0.0513	0.1616	0.0655	0.0419	0.1738	0.0277	0.0538	0.0477	0.0743	0.0317	0.0234	0.0278	0.1754	0.0908	0.0671	0.9685	0.0784	0.0259	0.0271	0.0229	0.0141	0.172	0.0626	0.0403	0.0922	0.0576	0.0773	0.0376	0.0367	0.2064	0.131	0.0243	0.0148	0.0534	0.0414	0.0638	1.0805	0.1233	0.088
7818	DAG(12:0/18:2)	Diacylglycerol	DAG Ester	53455	DMS-MS	100009603			0.0559	0.0433	0.0233	0.082	0.0273	0.019	0.0585	0.0178	0.0506	0.0287	0.0303	0.0258	0.031	0.018	0.0708	0.0599	0.0397	0.4494	0.0566	0.0183	0.0163	0.0099	0.0092	0.0932	0.0373	0.0188	0.0523	0.0569	0.0339	0.0218	0.0183	0.0955	0.0737	0.0193	0.0099	0.04	0.0228	0.0395	0.6134	0.0536	0.0441
7821	DAG(14:0/14:0)	Diacylglycerol	DAG Ester	53270	DMS-MS	100009418	C16667	HMDB07008	0.1894	0.1791	0.0419	0.289	0.0833	0.0739	0.1643	0.0548	0.0921	0.026	0.0563	0.2156	0.1426	0.0488	0.1663	0.2055	0.0536	0.4971	0.279	0.0873	0.0497	0.0822	0.01	0.1235	0.0506	0.0679	0.0872	0.3815	0.111	0.0687	0.0484	0.198	0.0372	0.0398	0.0141	0.1197	0.0913	0.1341	0.163	0.188	0.0984
7823	DAG(14:0/16:0)	Diacylglycerol	DAG Ester	54323	DMS-MS	100010471		HMDB07095	0.6442	0.2564	0.1603	0.2354	0.1322	0.0488	0.1628	0.1562	0.1178	0.3186	0.2885	0.0442	0.0273	0.0716	0.0763	0.8552	0.0444	0.9166	0.2504	0.0434	0.06	0.0235	0.0341	0.6968	0.3724	0.0789	0.463	0.0674	0.3296	0.0355	0.0517	0.5757	0.1749	0.0947	0.0556	0.1526	0.1047	0.3839	0.4381	0.2287	0.3258
7824	DAG(14:0/16:1)	Diacylglycerol	DAG Ester	54498	DMS-MS	100010646		HMDB07012	0.1486	0.0423	0.0384	0.0524	0.0349	0.0196	0.0355	0.03	0.0287	0.0733	0.0522	0.0156	0.0219	0.0252	0.0238	0.1809	0.0199	0.1965	0.0463	0.0141	0.0182	0.0118	0.0135	0.1405	0.0622	0.0201	0.1189	0.0307	0.0462	0.019	0.025	0.1931	0.043	0.0296	0.0251	0.0326	0.0316	0.0878	0.1026	0.0475	0.0738
7827	DAG(14:0/18:1)	Diacylglycerol	DAG Ester	53800	DMS-MS	100009948		HMDB07015	1.1112	0.6875	0.3109	0.5705	0.2453	0.1387	0.3113	0.1799	0.2374	0.4756	0.3715	0.1253	0.0885	0.1832	0.2353	1.3518	0.1805	1.1637	0.4469	0.1402	0.1601	0.0652	0.0957	0.9174	0.3957	0.222	0.9356	0.1935	0.362	0.1255	0.1716	0.8813	0.3337	0.2019	0.1205	0.3982	0.3172	0.7666	1.1451	0.4518	0.5766
7828	DAG(14:0/18:2)	Diacylglycerol	DAG Ester	54128	DMS-MS	100010276		HMDB07016	0.4405	0.1818	0.1158	0.2605	0.1288	0.0545	0.0946	0.0896	0.1492	0.1764	0.1441	0.0476	0.0373	0.0936	0.0908	0.6512	0.0905	0.4554	0.2315	0.059	0.0868	0.0301	0.0464	0.4524	0.2076	0.0834	0.456	0.0829	0.1169	0.0328	0.0653	0.3564	0.1404	0.1248	0.0515	0.1838	0.0835	0.3563	0.6725	0.1695	0.2058
7829	DAG(14:0/18:3)	Diacylglycerol	DAG Ester	54324	DMS-MS	100010472		HMDB07018	0.0832	0.0399	0.0198	0.048	0.0169	0.0155	0.0183	0.021	0.0326	0.0389	0.036	0.0149	0.0131	0.0178	0.0185	0.1711	0.0205	0.0607	0.0417	0.0173	0.0177	0.0087	0.011	0.0475	0.0386	0.015	0.0786	0.0195	0.0213	0.0126	0.0131	0.061	0.0277	0.0186	0.0148	0.0347	0.0215	0.074	0.061	0.0337	0.0288
7831	DAG(14:0/20:0)	Diacylglycerol	DAG Ester	53974	DMS-MS	100010122		HMDB07356	0.0835	0.0533	0.0518	0.0732	0.053	0.0545	0.0593	0.0847	0.0663	0.0883	0.0602	0.0683	0.0694	0.0411	0.04	0.0866	0.0321	0.0691	0.0997	0.0323	0.0394	0.0177	0.0279	0.1092	0.0992	0.0346	0.0777	0.0731	0.0909	0.0368	0.058	0.0828	0.0537	0.0383	0.02	0.0666	0.0689	0.1082	0.0923	0.0688	0.0744
7832	DAG(14:0/20:4)	Diacylglycerol	DAG Ester	53975	DMS-MS	100010123		HMDB07025	0.0634	0.0436	0.0325	0.035	0.0174	0.0094	0.0195	0.0154	0.0358	0.044	0.053	0.0089	0.011	0.0131	0.0145	0.1742	0.0093	0.0708	0.0325	0.0068	0.01	0.0061	0.0033	0.0558	0.0257	0.0077	0.0472	0.0156	0.0305	0.006	0.0071	0.0463	0.0297	0.0114	0.012	0.0267	0.0251	0.0901	0.0614	0.0295	0.0429
7833	DAG(14:0/22:6)	Diacylglycerol	DAG Ester	54499	DMS-MS	100010647		HMDB07034	0.0432	0.0134	0.009	0.0202	0.0109	0.0088	0.0083	0.0117	0.0103	0.029	0.0093	0.0067	0.0074	0.0129	0.0112	0.0797	0.016	0.0252	0.0278	0.0067	0.0117	0.0048	0.0032	0.0226	0.0153	0.0062	0.0171	0.0102	0.0153	0.0063	0.0088	0.0269	0.0112	0.0105	0.0071	0.0151	0.0144	0.0389	0.0251	0.0093	0.0107
7834	DAG(14:1/16:0)	Diacylglycerol	DAG Ester	53456	DMS-MS	100009604		HMDB07096	0.1049	0.0551	0.0459	0.0781	0.0451	0.0308	0.0389	1.1485	0.0452	1.2184	0.069	0.0356	0.0383	0.0358	0.0313	0.1699	0.0275	0.2282	0.0624	0.0501	0.0409	0.0305	0.0382	1.6493	1.7372	0.0331	0.3781	0.044	0.063	0.0454	0.0373	0.1048	0.049	0.0436	0.0928	0.0425	0.0543	0.1183	0.9581	0.0475	0.0594
7835	DAG(14:1/18:1)	Diacylglycerol	DAG Ester	54325	DMS-MS	100010473		HMDB07044	0.2578	0.1488	0.0952	0.1487	0.1148	0.1724	0.0745	0.0988	0.09	0.1039	0.1484	0.1141	0.0869	0.1636	0.1275	0.343	0.1084	0.2563	0.2138	0.2337	0.1553	0.0329	0.0641	0.1946	0.1158	0.0952	0.2321	0.1815	0.2024	0.2216	0.1177	0.2166	0.1093	0.1007	0.0578	0.1806	0.1733	0.2488	0.1451	0.1256	0.2356
7841	DAG(15:0/18:1)	Diacylglycerol	DAG Ester	53457	DMS-MS	100009605		HMDB07073	0.1338	0.1274	0.0581	0.0901	0.0619	0.0316	0.055	0.0438	0.1245	0.0961	0.0827	0.0318	0.0279	0.0397	0.0389	0.1817	0.0357	0.1299	0.1159	0.0361	0.0293	0.0265	0.0289	0.1228	0.0744	0.0573	0.255	0.0592	0.1151	0.0499	0.0476	0.1056	0.033	0.0438	0.0185	0.1009	0.066	0.1441	0.0696	0.1024	0.1463
7842	DAG(15:0/18:2)	Diacylglycerol	DAG Ester	53976	DMS-MS	100010124		HMDB07074	0.0633	0.0406	0.0271	0.0453	0.0267	0.0211	0.022	0.0301	0.0795	0.0405	0.036	0.0162	0.0196	0.0244	0.0224	0.098	0.0215	0.0609	0.0587	0.0241	0.0181	0.0154	0.0161	0.0693	0.0474	0.0388	0.1306	0.041	0.0377	0.0285	0.027	0.052	0.0136	0.0316	0.0111	0.0495	0.0275	0.0742	0.0391	0.0385	0.0561
7847	DAG(16:0/16:0)	Diacylglycerol	DAG Ester	53977	DMS-MS	100010125		HMDB07098	1.9043	0.4849	0.3172	0.4223	0.3495	0.1228	0.2301	0.1393	0.308	0.6967	0.5899	0.117	0.0824	0.1708	0.2162	2.2152	0.1202	1.7923	0.8979	0.2301	0.1566	0.1885	0.124	1.7433	0.4386	0.4649	1.2094	0.4344	0.558	0.1393	0.1631	1.4457	0.43	0.4082	0.2046	0.3697	0.4448	1.1179	0.323	0.4858	0.8414
7848	DAG(16:0/16:1)	Diacylglycerol	DAG Ester	53978	DMS-MS	100010126		HMDB07099	1.0019	0.2008	0.1224	0.212	0.1601	0.0679	0.0771	0.1073	0.0991	0.4084	0.1947	0.0701	0.0406	0.0963	0.0867	0.9367	0.0548	0.8204	0.2367	0.0991	0.0748	0.0734	0.087	0.7977	0.2177	0.1235	0.6998	0.1273	0.1479	0.0872	0.0984	1.0114	0.157	0.1893	0.1461	0.1361	0.2396	0.5394	0.1879	0.1712	0.3968
7850	DAG(16:0/18:0)	Diacylglycerol	DAG Ester	54500	DMS-MS	100010648		HMDB07100	1.0928	0.3275	0.245	0.3022	0.2473	0.116	0.1615	0.1608	0.256	0.3903	0.3735	0.1019	0.1478	0.1486	0.1823	0.9148	0.1108	1.2554	0.541	0.1626	0.1469	0.1241	0.11	0.8582	0.3061	0.2241	0.7126	0.4911	0.3978	0.1343	0.1513	0.6897	0.3008	0.2586	0.1607	0.3168	0.3152	0.6694	0.4014	0.355	0.5344
7851	DAG(16:0/18:1)	Diacylglycerol	DAG Ester	53630	DMS-MS	100009778	C13861	HMDB07102	7.7315	3.348	1.5432	2.4591	1.4737	0.7603	1.0236	1.2485	1.2695	3.2683	1.5802	0.6625	0.5106	0.8741	1.2568	7.0502	1.0057	5.4512	3.69	1.7763	1.0366	1.18	0.9606	6.3694	1.5396	3.0955	5.6868	3.2225	1.6428	1.0438	1.1348	4.7838	1.6243	1.9357	1.1008	3.0603	2.6086	4.8666	2.5333	2.2539	3.5837
7852	DAG(16:0/18:2)	Diacylglycerol	DAG Ester	53271	DMS-MS	100009419		HMDB07103	3.0794	0.9303	0.5553	1.0996	0.9778	0.3756	0.3335	0.6643	0.8618	1.23	0.6246	0.3541	0.2215	0.4944	0.5288	3.4986	0.5844	2.0076	1.9664	0.9322	0.7952	0.7112	0.5199	3.0735	0.9028	1.3033	2.7619	1.358	0.6058	0.4143	0.5364	1.9586	0.6622	1.2418	0.5221	1.7907	0.7242	2.1208	1.4778	0.8589	1.336
7853	DAG(16:0/18:3)	Diacylglycerol	DAG Ester	53979	DMS-MS	100010127		HMDB07105	0.4701	0.1607	0.0617	0.1461	0.0772	0.0421	0.0385	0.082	0.1161	0.1851	0.1094	0.0402	0.0313	0.0793	0.0598	0.7485	0.1064	0.2309	0.2279	0.1082	0.072	0.0563	0.0532	0.2302	0.1201	0.1021	0.3514	0.0919	0.0626	0.0701	0.0463	0.2482	0.1073	0.1283	0.0936	0.1439	0.1185	0.3673	0.1019	0.1237	0.1427
7856	DAG(16:0/20:3)	Diacylglycerol	DAG Ester	54501	DMS-MS	100010649		HMDB07111	0.1632	0.0751	0.0609	0.087	0.0498	0.0294	0.0358	0.0619	0.0736	0.1681	0.0574	0.0268	0.0249	0.0469	0.0401	0.2317	0.0218	0.1347	0.0844	0.0388	0.0272	0.0325	0.0123	0.2541	0.054	0.046	0.1573	0.0649	0.0526	0.0359	0.0238	0.143	0.069	0.0591	0.0557	0.0599	0.1119	0.1927	0.0555	0.0692	0.0881
7857	DAG(16:0/20:4)	Diacylglycerol	DAG Ester	53458	DMS-MS	100009606		HMDB07112	0.3628	0.165	0.142	0.1327	0.106	0.0473	0.0586	0.0858	0.1469	0.2547	0.2027	0.0285	0.0379	0.0635	0.0554	0.7274	0.0329	0.2567	0.2264	0.0649	0.0464	0.1032	0.0231	0.3868	0.09	0.0596	0.2459	0.138	0.1057	0.0424	0.0294	0.2082	0.1497	0.0895	0.1064	0.1264	0.1527	0.4799	0.0903	0.123	0.1668
7858	DAG(16:0/20:5)	Diacylglycerol	DAG Ester	54502	DMS-MS	100010650		HMDB07114	0.1292	0.0287	0.0217	0.0222	0.0369	0.0169	0.0112	0.0251	0.0315	0.0618	0.036	0.0085	0.0096	0.0312	0.0278	0.2735	0.0407	0.0558	0.0843	0.0145	0.0565	0.0111	0.0057	0.039	0.0172	0.0151	0.0704	0.0169	0.0589	0.0151	0.0073	0.0554	0.0233	0.0277	0.024	0.0273	0.0508	0.2059	0.0235	0.0251	0.0336
7859	DAG(16:0/22:5)	Diacylglycerol	DAG Ester	54326	DMS-MS	100010474		HMDB07120	0.1007	0.0414	0.0239	0.0494	0.0315	0.0201	0.0137	0.0299	0.0266	0.1155	0.0193	0.0142	0.0107	0.0379	0.0244	0.1487	0.0284	0.0631	0.0785	0.0277	0.0332	0.0297	0.0166	0.0858	0.0272	0.0418	0.1068	0.0396	0.0332	0.0168	0.0217	0.0818	0.0264	0.0348	0.0265	0.0363	0.0369	0.099	0.0323	0.0239	0.0454
7860	DAG(16:0/22:6)	Diacylglycerol	DAG Ester	53980	DMS-MS	100010128		HMDB07121	0.1774	0.0355	0.0229	0.055	0.0383	0.0265	0.0172	0.0318	0.0272	0.1243	0.0195	0.0102	0.0129	0.0436	0.0372	0.2754	0.0625	0.0568	0.1141	0.0174	0.047	0.0242	0.0131	0.0896	0.0473	0.036	0.0759	0.0275	0.0467	0.026	0.0251	0.0947	0.0351	0.0618	0.0227	0.0374	0.0351	0.1339	0.0436	0.0242	0.031
7861	DAG(16:1/16:1)	Diacylglycerol	DAG Ester	53631	DMS-MS	100009779		HMDB07128	0.1793	0.0376	0.0436	0.0637	0.0446	0.042	0.0425	0.1146	0.0309	0.2286	0.0511	0.0354	0.0379	0.0432	0.0379	0.1436	0.0304	0.1516	0.0714	0.0382	0.0422	0.0325	0.0446	0.1929	0.2308	0.0407	0.1706	0.0744	0.0498	0.0381	0.0583	0.2449	0.0449	0.0464	0.0707	0.0656	0.0782	0.1025	0.1553	0.0511	0.1106
7862	DAG(16:1/18:0)	Diacylglycerol	DAG Ester	54129	DMS-MS	100010277		HMDB07129	0.2509	0.0712	0.0654	0.0921	0.0787	0.0526	0.0693	0.064	0.0596	0.103	0.0877	0.047	0.0557	0.058	0.054	0.2332	0.05	0.3591	0.1194	0.055	0.0551	0.0503	0.0555	0.2227	0.0825	0.0658	0.2407	0.1077	0.0776	0.0595	0.0666	0.2571	0.0713	0.0845	0.065	0.0938	0.1257	0.1672	0.0872	0.0936	0.1541
7863	DAG(16:1/18:1)	Diacylglycerol	DAG Ester	54130	DMS-MS	100010278		HMDB07131	2.1728	0.6457	0.3233	0.7977	0.3438	0.2555	0.1953	0.3299	0.2199	0.8492	0.2897	0.2538	0.1241	0.2972	0.291	1.6418	0.234	1.3964	0.817	0.4742	0.2545	0.2077	0.356	1.8657	0.3649	0.4734	1.8307	0.5037	0.3226	0.2953	0.416	1.9801	0.3026	0.4175	0.4763	0.5267	1.0153	1.1461	0.6519	0.5536	1.1239
7864	DAG(16:1/18:2)	Diacylglycerol	DAG Ester	53632	DMS-MS	100009780		HMDB07132	0.8198	0.1747	0.1074	0.298	0.2063	0.1098	0.0531	0.158	0.1356	0.29	0.1159	0.1211	0.0479	0.1629	0.1067	0.7007	0.1079	0.4513	0.4255	0.2199	0.1637	0.1056	0.1747	0.8278	0.2055	0.1841	0.7651	0.2297	0.1294	0.1153	0.1632	0.8249	0.1142	0.2222	0.2135	0.2431	0.2273	0.4403	0.3368	0.2129	0.3734
7865	DAG(16:1/18:3)	Diacylglycerol	DAG Ester	53981	DMS-MS	100010129		HMDB07134	0.1695	0.0439	0.0188	0.0582	0.0243	0.0181	0.0139	0.0358	0.0343	0.0564	0.0357	0.0222	0.0125	0.0347	0.0187	0.2248	0.0237	0.0783	0.0643	0.0392	0.0232	0.0171	0.0254	0.0763	0.0385	0.0213	0.1285	0.0233	0.0192	0.0276	0.0196	0.1282	0.0326	0.0319	0.0516	0.0473	0.0492	0.1153	0.0374	0.0399	0.0519
7866	DAG(16:1/20:0)	Diacylglycerol	DAG Ester	54503	DMS-MS	100010651		HMDB07360	0.0309	0.0182	0.0211	0.0207	0.0266	0.0207	0.017	0.0206	0.0306	0.0289	0.0204	0.0122	0.022	0.0166	0.0171	0.0292	0.0166	0.0361	0.0206	0.0173	0.0389	0.0107	0.0079	0.035	0.0315	0.0124	0.03	0.0282	0.0248	0.0287	0.0179	0.024	0.0162	0.0175	0.0105	0.0193	0.0217	0.0257	0.0173	0.0186	0.0217
7867	DAG(16:1/20:2)	Diacylglycerol	DAG Ester	54131	DMS-MS	100010279		HMDB07138	0.0534	0.0242	0.0174	0.0331	0.0146	0.0135	0.0127	0.0233	0.0181	0.034	0.0128	0.0111	0.0133	0.0172	0.0143	0.0401	0.0156	0.0404	0.0318	0.0228	0.0203	0.0126	0.0149	0.0904	0.0229	0.0214	0.0491	0.0275	0.0136	0.0149	0.017	0.0444	0.0172	0.0197	0.0176	0.0393	0.0308	0.0333	0.0343	0.0207	0.03
7868	DAG(16:1/20:4)	Diacylglycerol	DAG Ester	53272	DMS-MS	100009420		HMDB07141	0.1559	0.0398	0.0384	0.0554	0.0338	0.0241	0.018	0.0371	0.0389	0.0861	0.0644	0.0128	0.012	0.0278	0.0171	0.2467	0.0082	0.0983	0.0663	0.0241	0.0139	0.0254	0.0105	0.1216	0.0329	0.0134	0.1108	0.0345	0.0235	0.0214	0.0157	0.1351	0.0409	0.0306	0.0665	0.033	0.0738	0.1496	0.037	0.0384	0.0603
7869	DAG(16:1/22:6)	Diacylglycerol	DAG Ester	53459	DMS-MS	100009607		HMDB07150	0.0788	0.013	0.0101	0.0275	0.0161	0.0161	0.0063	0.0468	0.0101	0.1206	0.01	0.0061	0.0081	0.0195	0.0146	0.1066	0.0187	0.0247	0.0404	0.0131	0.0228	0.0097	0.0074	0.0559	0.0864	0.011	0.0496	0.011	0.0198	0.0133	0.0153	0.0681	0.0123	0.021	0.0189	0.014	0.0248	0.0487	0.0601	0.0108	0.0183
7875	DAG(18:0/18:1)	Diacylglycerol	DAG Ester	54504	DMS-MS	100010652		HMDB07160	2.2181	0.8997	0.457	0.6863	0.4593	0.1796	0.2286	0.4215	0.4471	0.685	0.4922	0.157	0.2658	0.2688	0.3944	1.5236	0.3167	2.0948	1.0675	0.4721	0.3219	0.2559	0.2732	1.327	0.4265	0.6543	1.6294	1.5459	0.5214	0.3243	0.3196	1.2109	0.4762	0.4821	0.3084	1.3459	0.911	1.228	1.1072	0.6494	1.026
7876	DAG(18:0/18:2)	Diacylglycerol	DAG Ester	53273	DMS-MS	100009421		HMDB07161	0.9007	0.2872	0.168	0.3672	0.2937	0.0957	0.0871	0.2453	0.3219	0.3066	0.2088	0.0935	0.1155	0.1975	0.1872	0.8972	0.2098	0.9454	0.6423	0.2732	0.2556	0.1646	0.1654	0.7664	0.3064	0.3302	0.8835	0.6276	0.218	0.1267	0.1561	0.5603	0.2435	0.3148	0.1554	0.7944	0.2614	0.5963	0.6405	0.2543	0.3873
7877	DAG(18:0/18:3)	Diacylglycerol	DAG Ester	53982	DMS-MS	100010130		HMDB07163	0.1168	0.0526	0.0245	0.0531	0.032	0.0171	0.0128	0.0419	0.0458	0.042	0.0359	0.0174	0.0174	0.0273	0.0328	0.1763	0.0425	0.1087	0.0927	0.0374	0.0347	0.0165	0.0238	0.0718	0.0421	0.0402	0.1266	0.0574	0.0259	0.0238	0.0171	0.0851	0.0356	0.0386	0.033	0.0859	0.0375	0.0908	0.0585	0.0403	0.0501
7879	DAG(18:0/22:6)	Diacylglycerol	DAG Ester	53274	DMS-MS	100009422		HMDB07179	0.0544	0.0176	0.0133	0.0348	0.0215	0.0139	0.012	0.1531	0.0161	0.1654	0.0138	0.0081	0.0134	0.0181	0.0173	0.0798	0.0261	0.0434	0.0414	0.0168	0.0226	0.013	0.0113	0.3305	0.2347	0.0178	0.0815	0.0186	0.0253	0.0172	0.0137	0.0337	0.0241	0.0268	0.0225	0.0261	0.024	0.0615	0.1687	0.015	0.0193
7880	DAG(18:1/18:1)	Diacylglycerol	DAG Ester	53275	DMS-MS	100009423		HMDB07218	8.5698	5.7889	2.1657	4.6105	1.7857	1.3022	1.2749	2.8048	1.6034	3.6397	1.3634	1.1913	0.913	1.3866	2.3105	7.1798	2.3643	4.82	5.4441	3.4881	1.8095	1.4694	1.9681	6.9801	2.0017	5.7197	8.0446	5.6242	2.3948	2.099	2.2881	4.9967	1.9046	2.1917	1.8261	8.7183	4.8253	5.3922	5.5897	3.4192	4.7002
7881	DAG(18:1/18:2)	Diacylglycerol	DAG Ester	53276	DMS-MS	100009424		HMDB07219	6.6119	2.9877	1.3462	3.939	2.2726	1.1969	0.7789	3.0505	2.0946	2.756	1.0403	1.2779	0.7898	1.5769	1.8458	6.6189	2.5771	3.4248	5.878	3.5708	2.5877	1.6206	1.9851	7.0191	2.3783	4.3105	7.3625	4.8761	2.0187	1.5372	1.9552	4.1766	1.5575	2.5175	1.6915	8.2821	2.3659	4.5121	5.8212	2.669	3.3555
7882	DAG(18:1/20:1)	Diacylglycerol	DAG Ester	53801	DMS-MS	100009949		HMDB07224	0.1304	0.0829	0.0593	0.1027	0.0658	0.0359	0.0338	0.0574	0.0498	0.0881	0.0348	0.0483	0.0427	0.0518	0.0714	0.1171	0.0481	0.1135	0.1077	0.0696	0.0421	0.0324	0.0309	0.2907	0.0503	0.0787	0.1359	0.1376	0.0544	0.0506	0.0537	0.0865	0.0697	0.0435	0.033	0.114	0.0938	0.103	0.0947	0.0641	0.0915
7883	DAG(18:1/20:2)	Diacylglycerol	DAG Ester	54327	DMS-MS	100010475		HMDB07225	0.1333	0.0834	0.0564	0.1047	0.0503	0.0376	0.0294	0.0824	0.0535	0.1316	0.0355	0.0378	0.0407	0.0522	0.0653	0.1058	0.0323	0.1089	0.0978	0.0771	0.0676	0.0294	0.0224	0.3058	0.0527	0.0762	0.125	0.0798	0.0433	0.0443	0.0395	0.0906	0.0628	0.0459	0.0509	0.0834	0.0943	0.1026	0.0892	0.0649	0.0705
7884	DAG(18:1/20:3)	Diacylglycerol	DAG Ester	53633	DMS-MS	100009781		HMDB07227	0.3468	0.2984	0.1483	0.3098	0.1099	0.0987	0.073	0.3596	0.1937	0.3956	0.09	0.0746	0.1006	0.1374	0.1503	0.4334	0.0685	0.2581	0.2517	0.2187	0.101	0.0984	0.047	0.4629	0.1271	0.145	0.4448	0.208	0.1272	0.1219	0.0811	0.3135	0.1714	0.1115	0.214	0.2444	0.4658	0.3761	0.2392	0.2119	0.1897
7885	DAG(18:1/20:4)	Diacylglycerol	DAG Ester	53460	DMS-MS	100009608		HMDB07228	0.9204	0.658	0.4036	0.5727	0.3493	0.1817	0.172	0.6233	0.4872	0.7084	0.42	0.1054	0.1629	0.228	0.2643	1.6615	0.1503	0.564	0.7161	0.4244	0.2081	0.36	0.1134	0.7497	0.2639	0.2583	0.8026	0.636	0.2746	0.2109	0.1228	0.5279	0.4528	0.2725	0.424	0.8079	0.6006	1.0967	0.6673	0.4278	0.4275
7886	DAG(18:1/20:5)	Diacylglycerol	DAG Ester	53277	DMS-MS	100009425		HMDB07230	0.3403	0.1059	0.0596	0.0925	0.1102	0.046	0.0285	0.1868	0.1154	0.1395	0.076	0.0254	0.0421	0.0912	0.1631	0.626	0.1819	0.1172	0.2716	0.1064	0.2805	0.0417	0.0194	0.0848	0.0428	0.0536	0.2196	0.0664	0.1412	0.0587	0.0239	0.1238	0.0677	0.0776	0.1073	0.1868	0.2006	0.4794	0.1211	0.0722	0.0725
7887	DAG(18:1/22:4)	Diacylglycerol	DAG Ester	53278	DMS-MS	100009426		HMDB07234	0.0564	0.0341	0.0262	0.0468	0.0173	0.018	0.0164	0.0357	0.0271	0.0565	0.0263	0.0144	0.024	0.0238	0.026	0.0633	0.0123	0.0464	0.0529	0.0208	0.0183	0.0172	0.0093	0.0716	0.0291	0.0282	0.0757	0.0525	0.0275	0.015	0.0191	0.0459	0.0175	0.0187	0.0206	0.0503	0.0452	0.0552	0.0332	0.0342	0.0464
7888	DAG(18:1/22:5)	Diacylglycerol	DAG Ester	53802	DMS-MS	100009950		HMDB07236	0.1648	0.1036	0.0455	0.1345	0.0629	0.0496	0.0223	0.0915	0.0415	0.2363	0.0279	0.0412	0.0298	0.0906	0.0678	0.204	0.0802	0.0875	0.189	0.0659	0.0724	0.0677	0.0411	0.1702	0.0501	0.1016	0.1992	0.1164	0.0822	0.0523	0.0516	0.137	0.0405	0.0553	0.0685	0.1028	0.1176	0.1768	0.1071	0.0602	0.0863
7889	DAG(18:1/22:6)	Diacylglycerol	DAG Ester	53461	DMS-MS	100009609		HMDB07237	0.4045	0.1209	0.0452	0.1725	0.0955	0.0838	0.0268	0.1228	0.0606	0.2771	0.0335	0.0255	0.044	0.1215	0.1367	0.5487	0.2479	0.0933	0.2957	0.0589	0.1716	0.067	0.0479	0.2187	0.0654	0.1068	0.1967	0.0935	0.165	0.087	0.0792	0.2005	0.0761	0.1344	0.0556	0.1469	0.1324	0.3007	0.1509	0.0512	0.0735
7891	DAG(18:2/18:3)	Diacylglycerol	DAG Ester	53279	DMS-MS	100009427		HMDB07250	0.3922	0.1237	0.0588	0.2289	0.1116	0.064	0.0352	0.2332	0.237	0.1584	0.0939	0.0719	0.0495	0.1401	0.0876	0.7216	0.2283	0.1406	0.401	0.2066	0.1747	0.0604	0.0911	0.2471	0.1745	0.1426	0.4786	0.1611	0.0768	0.0994	0.0675	0.2297	0.1144	0.1358	0.1371	0.3025	0.1232	0.3163	0.2114	0.1455	0.138
7892	DAG(18:2/20:3)	Diacylglycerol	DAG Ester	54132	DMS-MS	100010280		HMDB07256	0.1675	0.096	0.0702	0.1485	0.0922	0.0574	0.0317	0.2334	0.1594	0.181	0.0563	0.0485	0.0517	0.0903	0.0797	0.2646	0.0412	0.1197	0.1695	0.1422	0.085	0.0654	0.0292	0.2546	0.0902	0.0638	0.2407	0.1297	0.0631	0.0649	0.0384	0.1498	0.0943	0.0821	0.1184	0.148	0.1638	0.1867	0.1612	0.1091	0.0841
7893	DAG(18:2/20:4)	Diacylglycerol	DAG Ester	53462	DMS-MS	100009610		HMDB07257	0.4655	0.1769	0.194	0.268	0.2705	0.1021	0.0687	0.379	0.3769	0.3192	0.2076	0.0682	0.082	0.1561	0.1342	0.9807	0.1057	0.2175	0.4979	0.247	0.1774	0.2396	0.0666	0.4114	0.1788	0.1244	0.463	0.3442	0.121	0.0946	0.0668	0.2852	0.2211	0.1992	0.2277	0.4637	0.23	0.5252	0.4035	0.1985	0.1767
7894	DAG(18:2/20:5)	Diacylglycerol	DAG Ester	54505	DMS-MS	100010653		HMDB07259	0.165	0.0333	0.0298	0.0425	0.0902	0.0278	0.0139	0.1175	0.0995	0.0718	0.0401	0.0159	0.0216	0.0714	0.083	0.4068	0.139	0.0507	0.1887	0.0676	0.2864	0.024	0.0127	0.0438	0.034	0.0279	0.136	0.0342	0.0692	0.0339	0.0152	0.0762	0.036	0.0601	0.063	0.1116	0.081	0.2605	0.0783	0.0344	0.0358
7895	DAG(18:2/22:4)	Diacylglycerol	DAG Ester	54133	DMS-MS	100010281		HMDB07263	0.0425	0.0162	0.0199	0.0306	0.0215	0.0165	0.0157	0.0325	0.0359	0.0324	0.028	0.0172	0.0273	0.0196	0.0263	0.0472	0.0117	0.0301	0.0461	0.0177	0.0191	0.0137	0.0066	0.0492	0.0279	0.0225	0.0606	0.037	0.0189	0.0095	0.0178	0.0335	0.0128	0.0268	0.0113	0.0525	0.0364	0.0372	0.0307	0.0253	0.0354
7896	DAG(18:2/22:5)	Diacylglycerol	DAG Ester	53463	DMS-MS	100009611		HMDB07265	0.0938	0.0338	0.022	0.0719	0.0486	0.0244	0.0118	0.0676	0.0347	0.1208	0.0163	0.0245	0.0176	0.0683	0.0437	0.136	0.0486	0.0398	0.1231	0.0383	0.0633	0.0462	0.0304	0.1143	0.0333	0.053	0.1103	0.0808	0.0473	0.0281	0.0296	0.0749	0.0257	0.0442	0.0395	0.0681	0.0412	0.09	0.0667	0.0328	0.0425
7897	DAG(18:2/22:6)	Diacylglycerol	DAG Ester	54506	DMS-MS	100010654		HMDB07266	0.2142	0.0356	0.0242	0.0792	0.0799	0.0506	0.012	0.0952	0.0449	0.136	0.0151	0.0153	0.0218	0.0877	0.0684	0.3401	0.1684	0.0431	0.2036	0.0343	0.1707	0.0409	0.0295	0.1418	0.0387	0.0511	0.1104	0.0502	0.0868	0.0404	0.0418	0.1151	0.0376	0.1029	0.0294	0.0723	0.0498	0.1479	0.0875	0.0291	0.0337
7765	DCER(14:0)	Sphingolipids	Dihydroceramide	53803	DMS-MS	100009951		HMDB11759	0.0245	0.0134	0.0186	0.0208	0.0132	0.0165	0.0224	0.0138	0.0209	0.0197	0.0181	0.018	0.0177	0.0167	0.0199	0.0198	0.0165	0.0269	0.0292	0.0135	0.012	0.0147	0.0119	0.0174	0.0151	0.0159	0.018	0.0224	0.0152	0.0161	0.0163	0.0212	0.0177	0.0125	0.0128	0.0194	0.0212	0.0165	0.0245	0.0201	0.0187
7766	DCER(16:0)	Sphingolipids	Dihydroceramide	54134	DMS-MS	100010282		HMDB11760	0.122	0.0844	0.0861	0.0928	0.0645	0.0616	0.0708	0.1007	0.1005	0.1043	0.0952	0.0559	0.0734	0.053	0.0724	0.076	0.069	0.069	0.1096	0.0702	0.0629	0.0622	0.0487	0.1308	0.1105	0.0791	0.1166	0.1305	0.0909	0.0831	0.0559	0.0925	0.0721	0.0903	0.0431	0.1029	0.0988	0.1131	0.1085	0.0866	0.0954
7767	DCER(18:0)	Sphingolipids	Dihydroceramide	53464	DMS-MS	100009612		HMDB11761	0.0534	0.0374	0.0433	0.0505	0.0384	0.0428	0.0383	0.2605	0.0591	0.2918	0.0502	0.0304	0.0484	0.0295	0.0339	0.0603	0.0315	0.0586	0.0646	0.0389	0.0488	0.0349	0.0404	0.2563	0.3769	0.0429	0.1366	0.085	0.049	0.0468	0.0479	0.0584	0.0333	0.0724	0.0397	0.0426	0.0603	0.0591	0.217	0.0627	0.0876
7768	DCER(18:1)	Sphingolipids	Dihydroceramide	53983	DMS-MS	100010131		HMDB11763	0.0211	0.0144	0.0136	0.0179	0.0114	0.0143	0.019	0.0144	0.0151	0.0162	0.0184	0.0113	0.0188	0.0148	0.0175	0.0122	0.0188	0.0244	0.0248	0.0148	0.0157	0.0115	0.0104	0.0242	0.0151	0.0165	0.0296	0.0271	0.0231	0.0136	0.0159	0.018	0.0156	0.0169	0.0133	0.0157	0.0231	0.025	0.0217	0.0173	0.0241
7769	DCER(20:0)	Sphingolipids	Dihydroceramide	53280	DMS-MS	100009428		HMDB11764	0.0684	0.0608	0.0544	0.0602	0.0514	0.0549	0.0587	0.0557	0.066	0.0502	0.0514	0.0451	0.0453	0.051	0.0442	0.0684	0.0572	0.0623	0.0774	0.0494	0.0563	0.0403	0.0446	0.0622	0.0554	0.0684	0.07	0.0748	0.0564	0.0588	0.0533	0.0639	0.0436	0.0795	0.0447	0.0747	0.0693	0.0579	0.0513	0.0504	0.0904
7770	DCER(20:1)	Sphingolipids	Dihydroceramide	53984	DMS-MS	100010132			0.0346	0.017	0.0144	0.0187	0.0184	0.0205	0.0159	0.0236	0.0153	0.0186	0.0163	0.0203	0.0211	0.0149	0.0203	0.0231	0.0158	0.0299	0.0303	0.0179	0.0183	0.016	0.0128	0.0284	0.0222	0.0183	0.0221	0.0311	0.0197	0.0155	0.0168	0.031	0.0133	0.0225	0.0109	0.0245	0.0222	0.0204	0.0255	0.0262	0.0279
7771	DCER(22:0)	Sphingolipids	Dihydroceramide	53465	DMS-MS	100009613		HMDB11765	0.2596	0.1701	0.1639	0.2057	0.177	0.135	0.2118	0.1994	0.2433	0.1531	0.2075	0.141	0.1524	0.1112	0.1683	0.2211	0.1409	0.2071	0.2625	0.1714	0.1531	0.0958	0.1078	0.1634	0.1999	0.1792	0.2832	0.2956	0.1513	0.1527	0.1639	0.2223	0.2031	0.2607	0.105	0.2321	0.2539	0.2192	0.1993	0.2014	0.3089
7772	DCER(22:1)	Sphingolipids	Dihydroceramide	53804	DMS-MS	100016011			0.1178	0.1126	0.0857	0.1038	0.1051	0.1048	0.093	0.1134	0.0971	0.0899	0.1028	0.0934	0.0919	0.0935	0.1069	0.1165	0.0989	0.1101	0.0968	0.0979	0.1164	0.0934	0.0982	0.1269	0.105	0.1104	0.1093	0.1091	0.1029	0.084	0.1023	0.12	0.0878	0.1005	0.0984	0.1013	0.113	0.1111	0.1051	0.1102	0.1157
7773	DCER(22:2)	Sphingolipids	Dihydroceramide	57732	DMS-MS	100009952		HMDB11766	0.3298	0.1148	0.1334	0.1657	0.1359	0.157	0.1083	0.1755	0.1226	0.1263	0.1406	0.1255	0.1136	0.104	0.1112	0.2627	0.1101	0.1406	0.1836	0.1068	0.1582	0.0748	0.073	0.1278	0.1089	0.1225	0.417	0.199	0.1094	0.1397	0.1053	0.2144	0.1135	0.1483	0.104	0.1455	0.1681	0.301	0.1224	0.1513	0.2099
7774	DCER(24:0)	Sphingolipids	Dihydroceramide	54328	DMS-MS	100010476		HMDB11768	0.662	0.3767	0.4056	0.4861	0.3806	0.3481	0.446	0.4807	0.5083	0.3125	0.3999	0.4313	0.28	0.2565	0.3606	0.5529	0.2645	0.413	0.668	0.3896	0.3838	0.1696	0.1872	0.2729	0.4317	0.3929	0.6356	0.6569	0.3286	0.3595	0.3768	0.4258	0.4357	0.4997	0.2437	0.4958	0.4784	0.5406	0.5246	0.4112	0.5533
7775	DCER(24:1)	Sphingolipids	Dihydroceramide	53466	DMS-MS	100009614		HMDB11769	0.438	0.3356	0.3284	0.324	0.3468	0.3599	0.2739	0.3934	0.4074	0.3091	0.3634	0.3129	0.3519	0.2886	0.3015	0.445	0.3124	0.3264	0.4645	0.2897	0.3156	0.2686	0.3724	0.3178	0.3454	0.3468	0.4784	0.4393	0.3295	0.3479	0.3817	0.3681	0.2488	0.4114	0.1953	0.3501	0.4042	0.4455	0.3084	0.356	0.5696
7776	DCER(26:0)	Sphingolipids	Dihydroceramide	53634	DMS-MS	100009782		HMDB11771	0.1522	0.2504	0.0825	0.1129	0.0584	0.0857	0.065	0.0694	0.1291	0.1107	0.0455	0.0764	0.0654	0.065	0.0659	0.085	0.0672	0.1389	0.1018	0.0915	0.0559	0.0797	0.0422	0.0688	0.0593	0.074	0.066	0.1052	0.0662	0.0624	0.087	0.1373	0.0614	0.0699	0.0563	0.1132	0.106	0.0747	0.056	0.0889	0.1
7777	DCER(26:1)	Sphingolipids	Dihydroceramide	53281	DMS-MS	100009429		HMDB11772	0.0782	0.0606	0.0486	0.0714	0.0642	0.0724	0.0578	0.0703	0.0828	0.0384	0.0549	0.0612	0.0887	0.0579	0.0586	0.0638	0.0581	0.0693	0.0941	0.0561	0.0506	0.0594	0.0617	0.0647	0.0565	0.056	0.0569	0.0887	0.0568	0.054	0.0598	0.0601	0.0367	0.0539	0.0242	0.0629	0.0648	0.0652	0.0445	0.0688	0.0761
7690	FFA(12:0)	Free Fatty Acids	Saturated FFA	54508	DMS-MS	100010656	C02679	HMDB00638	4.8654	6.4569	3.8066	7.6857	4.2362	5.6599	10.755	5.8529	5.9513	5.4243	4.1443	17.9923	3.9127	3.9866	6.6885	4.4884	14.3157	55.2836	4.3225	3.7114	3.7135	3.9846	5.3014	9.6138	3.7617	6.4157	4.4661	4.7805	5.8058	3.6657	4.6309	5.4463	8.3646	4.7415	3.5774	4.0589	3.3325	3.1367	22.7871	6.3158	5.4858
7692	FFA(14:0)	Free Fatty Acids	Saturated FFA	53467	DMS-MS	100009615	C06424	HMDB00806	21.8659	24.5438	16.3607	24.189	17.2051	16.6848	27.1411	27.5537	21.345	20.9952	16.1368	36.377	16.7246	19.5782	16.5325	28.4355	28.6645	47.0685	16.2462	14.0479	16.1913	18.8459	22.8008	26.3142	18.1512	22.9245	25.1425	19.0387	25.4147	17.583	17.3633	31.0095	24.9243	23.1032	23.2537	16.8194	13.7627	15.4046	22.4958	23.5257	22.316
7703	FFA(14:1)	Free Fatty Acids	Monounsaturated FFA	53985	DMS-MS	100010133	C08322	HMDB02000	4.4792	3.5772	2.657	4.6323	2.8763	3.0224	4.7194	8.0644	3.1588	7.6097	2.2713	6.8681	2.9123	2.6693	2.3741	3.833	3.3068	6.8601	2.2935	2.2306	2.7654	2.6957	5.0032	9.302	7.5719	3.6286	3.9388	3.2388	2.8667	3.498	2.9014	4.7237	3.4361	3.6974	5.7986	2.7616	2.0773	2.6322	5.8773	3.073	2.945
7693	FFA(15:0)	Free Fatty Acids	Saturated FFA	54135	DMS-MS	100010283	C16537	HMDB00826	5.8468	6.6704	4.5019	6.5194	5.634	4.9776	5.7748	10.1255	6.2131	9.904	4.8104	7.0954	5.2715	4.9321	4.6581	6.7283	5.36	6.681	4.8228	4.5139	4.7112	5.1009	6.9256	11.3615	10.32	6.223	6.9226	11.6834	6.5283	4.8985	4.9784	6.7815	5.4412	5.5695	20.3549	5.3261	4.2689	4.8543	7.1872	5.7509	7.6992
7694	FFA(16:0)	Free Fatty Acids	Saturated FFA	53986	DMS-MS	100010134	C00249	HMDB00220	172.404	163.808	179.729	186.816	200.793	161.741	176.368	196.917	203.012	223.357	159.461	221.109	193.304	161.546	181.901	183.727	183.736	171.896	159.461	163.426	160.657	177.177	265.964	208.196	223.243	161.044	198.065	203.825	174.845	174.924	166.324	212.551	192.12	178.242	118.773	198.928	144.402	166.222	173.044	174.891	159.882
7704	FFA(16:1)	Free Fatty Acids	Monounsaturated FFA	54136	DMS-MS	100010284	C08362	HMDB03229	16.545	7.3301	3.6054	14.6101	7.46	7.1437	16.0339	19.4057	4.5354	8.9988	2.7158	32.7665	3.8072	8.0219	2.7341	15.9832	12.055	34.2417	3.1387	3.9512	7.8585	9.1425	14.2573	14.1018	2.9595	32.5223	14.7464	7.0998	4.4989	10.7227	8.9978	36.355	13.7477	17.4081	37.0599	3.0073	2.1375	2.9874	4.1372	7.5525	6.9372
7695	FFA(17:0)	Free Fatty Acids	Saturated FFA	53468	DMS-MS	100009616	C17714	HMDB02259	5.7641	6.2779	4.94	6.9844	6.4232	5.6956	6.6234	7.9025	6.7813	6.2404	5.0058	8.0046	6.0342	6.5755	5.1326	7.3229	5.8946	8.0077	5.4031	4.7798	5.3235	6.2223	5.8086	7.0189	5.689	12.5983	7.2629	7.2547	7.8048	6.6139	5.7418	8.1963	7.2269	6.7016	7.0812	5.8532	4.796	5.3004	5.772	6.0159	6.6146
7696	FFA(18:0)	Free Fatty Acids	Saturated FFA	53805	DMS-MS	100009953	C01530	HMDB00827	131.433	127.884	138.099	143.319	158.655	134.524	142.035	156.405	161.119	170.369	131.843	163.765	156.209	139.511	149.673	143.561	150.048	143.062	130.371	128.232	134.803	147.28	184.81	164.729	170.088	132.65	153.209	169.312	147.211	144.399	138.565	169.923	162.488	142.636	107.155	160.968	125.01	137.323	141.619	143.55	131.941
7705	FFA(18:1)	Free Fatty Acids	Monounsaturated FFA	53469	DMS-MS	100009617	C00712	HMDB00207	88.6125	85.9018	32.1714	92.9225	81.0536	44.613	77.9186	114.894	55.4389	82.0672	22.7379	141.066	28.033	48.723	34.236	96.9353	93.493	98.5395	32.7575	47.626	50.5767	67.1171	68.1289	98.8835	22.5983	96.6884	81.3112	73.1098	40.9588	69.1825	59.811	107.343	94.5578	88.3846	80.7607	86.7127	15.4075	22.0987	69.1508	62.1684	47.5049
7710	FFA(18:2)	Free Fatty Acids	Polyunsaturated FFA (PUFA)	53635	DMS-MS	100009783	C01595	HMDB00673	48.9365	34.5314	15.1183	53.2915	48.1314	23.7644	38.0306	83.7816	48.0036	44.1144	11.1248	100.676	17.2757	28.723	18.4059	57.1923	60.728	66.4855	17.5455	30.9101	39.5004	35.3191	35.8803	62.5248	13.3687	65.4796	46.6338	37.4646	14.2952	31.4715	30.4219	55.2309	56.9343	65.7114	64.0262	50.327	7.4258	12.724	45.4553	31.1338	21.033
7712	FFA(18:4)	Free Fatty Acids	Polyunsaturated FFA (PUFA)	53636	DMS-MS	100009784	C16300	HMDB06547	0.6524	0.6262	0.5676	0.7561	0.6608	0.5934	0.6396	0.72	0.6358	0.6601	0.5568	0.7663	0.6969	0.6228	0.5893	0.8183	0.6437	0.601	0.5751	0.569	0.6	0.5924	0.8678	0.5723	0.5879	0.5958	0.5321	0.7105	0.6586	0.6838	0.5372	0.7169	0.701	0.5641	0.6056	0.6072	0.5525	0.644	0.7021	0.5655	0.5515
7698	FFA(20:0)	Free Fatty Acids	Saturated FFA	53470	DMS-MS	100009618	C06425	HMDB02212	6.8639	7.9148	5.2683	7.1594	8.6323	8.2438	9.3128	8.6904	10.9259	8.2736	8.7099	7.2737	8.2612	6.4155	9.4792	6.1601	8.3159	7.1479	6.9419	7.6455	8.1616	11.3286	12.4028	11.4583	8.3359	10.3741	6.7018	12.0799	7.6451	7.1933	9.0951	7.9159	7.9716	6.4875	11.9255	10.9714	9.4819	7.1046	8.8321	9.1275	10.1997
7706	FFA(20:1)	Free Fatty Acids	Monounsaturated FFA	53987	DMS-MS	100010135	C16526	HMDB34296	3.491	10.4321	3.2493	3.5093	3.9353	4.5802	3.836	4.6387	3.4798	3.6395	2.6075	5.4942	2.9542	2.9956	3.2281	3.7682	3.8657	4.1997	2.4765	2.8186	2.7422	4.8434	3.0435	4.5818	2.5514	4.5671	2.4581	4.042	2.7948	3.5778	3.3828	3.7792	4.6271	3.5335	3.4922	3.2396	7.473	2.641	3.4243	3.4973	3.5503
7713	FFA(20:2)	Free Fatty Acids	Polyunsaturated FFA (PUFA)	54137	DMS-MS	100010285	C16525	HMDB05060	64.6076	69.1669	87.6389	63.7779	48.5706	91.0672	65.1476	83.13	75.6537	69.2962	58.7435	79.4589	59.9734	58.5469	65.2056	57.4815	60.32	53.9356	53.7332	54.5505	53.8072	91.7597	66.0023	73.9518	59.5043	63.8133	37.8989	74.5799	53.6508	68.0822	67.2159	64.7317	75.3772	64.6127	45.3961	64.2094	74.7446	62.3305	69.7749	65.7997	68.1581
7714	FFA(20:3)	Free Fatty Acids	Polyunsaturated FFA (PUFA)	54138	DMS-MS	100010286	C03242	HMDB02925	1.4221	1.4174	0.8834	2.0433	1.4255	1.1783	1.3617	2.2905	1.4532	1.2051	0.7706	2.4747	1.4038	1.1485	1.0843	2.0005	1.1292	1.8688	1.2401	0.8828	1.338	1.2629	0.732	2.061	0.8422	1.4162	1.1485	1.8153	1.0355	1.3585	1.1735	2.133	1.6018	1.5819	1.9021	1.1115	1.0139	1.273	1.2194	1.2059	1.1295
7715	FFA(20:4)	Free Fatty Acids	Polyunsaturated FFA (PUFA)	53471	DMS-MS	100009619	C00219	HMDB01043	2.0523	2.8478	1.8427	2.6629	1.8066	3.6134	2.0914	5.0271	2.6798	2.5128	1.8286	3.1178	1.7057	2.3294	1.4802	4.699	2.0029	3.7907	2.0418	1.7275	4.0138	3.4843	1.7402	2.1096	1.4874	1.9481	1.8073	2.6749	1.686	2.1385	2.7477	2.74	3.4569	2.2768	5.2753	2.0378	1.6119	2.0394	2.0507	1.8702	2.2942
7716	FFA(20:5)	Free Fatty Acids	Polyunsaturated FFA (PUFA)	54329	DMS-MS	100010477		HMDB01999	2.5189	2.216	2.4191	2.1507	2.4888	2.6306	2.4636	2.9351	3.0097	3.0508	2.6232	2.3401	3.0658	2.9508	3.0785	3.2583	3.163	3.2328	3.0752	2.4409	3.738	2.6828	2.7373	2.8896	2.6901	2.5646	1.9303	2.8695	2.3169	2.27	2.228	2.509	2.7966	2.1955	3.7606	2.7009	3.04	3.1105	2.3285	2.7982	2.607
7700	FFA(22:0)	Free Fatty Acids	Saturated FFA	54139	DMS-MS	100010287	C08281	HMDB00944	56.2341	47.2325	56.8333	69.121	22.0727	70.6144	33.9009	42.2706	25.3531	27.3093	27.7707	99.2899	37.7462	27.3291	24.2374	49.1452	32.7683	30.2348	27.4833	49.8552	43.9619	57.5587	27.0751	19.7419	19.1529	19.1493	45.0687	43.5881	49.3684	23.1837	48.1221	32.1381	54.0425	33.7313	14.6143	39.7344	28.4333	29.023	21.0548	15.6142	25.2283
7707	FFA(22:1)	Free Fatty Acids	Monounsaturated FFA	53472	DMS-MS	100009620	C08316	HMDB02068	9.8837	9.2429	6.589	13.6393	11.6367	8.1732	13.3489	11.459	11.777	7.6845	7.0548	16.5678	13.3937	10.3427	12.6792	11.418	9.623	15.6457	9.5499	8.6681	9.921	12.7457	8.5392	12.8325	6.1694	13.2422	7.7593	14.0328	8.1087	9.2498	7.712	14.6909	9.2924	9.8538	7.9789	10.7488	9.9212	10.9257	8.7664	14.5093	9.8457
7717	FFA(22:2)	Free Fatty Acids	Polyunsaturated FFA (PUFA)	53283	DMS-MS	100009431	C16533	HMDB61714	1.2705	1.1007	1.087	1.6413	1.0682	1.5112	1.6588	2.0358	1.2268	1.2291	0.9214	2.6569	1.1704	1.0398	0.9442	1.5427	1.1884	2.0699	0.9887	1.092	0.9872	1.5535	1.2681	1.4606	0.9498	1.4102	0.9627	1.134	1.2713	1.201	1.2154	2.1357	1.5975	1.2255	1.6268	1.004	0.9167	0.7365	1.0498	1.2559	1.0348
7718	FFA(22:4)	Free Fatty Acids	Polyunsaturated FFA (PUFA)	53637	DMS-MS	100009785	C16527	HMDB02226	1.2247	1.167	0.9096	1.0782	0.9076	1.4372	0.9007	1.7138	0.9419	1.1426	0.9116	1.498	0.8424	0.9831	1.0854	1.2985	0.7065	1.576	0.7133	0.8735	0.901	1.8592	0.7688	0.9682	0.564	0.9965	0.7315	0.9685	0.9795	0.9706	0.8736	1.2255	1.1713	0.8821	2.6568	0.8275	0.6653	0.6323	0.9852	0.7347	0.8306
7719	FFA(22:5)	Free Fatty Acids	Polyunsaturated FFA (PUFA)	54509	DMS-MS	100010657	C16513	HMDB06528	1.4733	1.4552	1.1436	1.8779	1.3974	1.4748	1.3926	2.5431	1.5496	1.7835	0.869	2.3806	1.3697	1.6978	1.011	2.6127	1.532	2.4075	1.1629	1.1839	1.7322	1.7717	1.1015	1.5835	0.8356	1.6964	1.1703	1.3733	1.4398	1.3844	1.2103	1.7734	2.094	1.7896	2.9184	1.1694	0.9383	1.1592	1.2554	1.1441	1.2437
7720	FFA(22:6)	Free Fatty Acids	Polyunsaturated FFA (PUFA)	53806	DMS-MS	100009954	C06429	HMDB02183	3.7035	2.7748	2.1467	3.4426	2.5313	2.7352	2.407	3.609	3.0402	3.5225	1.4479	2.9023	2.4173	3.1532	1.9457	5.9053	4.8497	2.5936	2.2067	1.6071	3.3302	2.5968	1.5762	3.1421	1.3862	3.5751	1.9527	1.9444	2.4515	3.1554	2.0795	2.6968	5.0567	4.9308	3.4913	2.013	1.4601	2.258	1.9979	1.53	1.8321
7702	FFA(24:0)	Free Fatty Acids	Saturated FFA	53807	DMS-MS	100009955	C08320	HMDB02003	5.4296	3.5353	3.9817	5.3016	4.8391	5.5199	4.8079	6.0556	7.3269	3.1579	2.2494	6.1039	9.0189	3.7683	5.0969	3.5574	2.9524	6.6459	3.5464	4.6798	3.8842	6.5575	2.4953	4.7129	3.1178	5.57	3.2314	6.9616	4.1217	5.8414	5.8419	3.884	3.8415	3.7273	3.273	4.6402	3.9112	5.5863	4.1425	4.1605	2.8975
7708	FFA(24:1)	Free Fatty Acids	Monounsaturated FFA	54140	DMS-MS	100010288	C08323	HMDB02368	10.3313	11.284	10.1365	14.3508	10.3254	12.6229	12.9488	14.1803	12.6018	8.2571	7.285	15.6014	14.7003	10.642	13.1608	11.1947	9.6749	14.3363	10.0646	8.8059	9.1485	18.0495	5.5054	13.1338	6.9101	12.3401	6.802	15.8899	10.1312	12.0124	9.8269	13.3773	10.7676	10.8014	6.7005	11.2362	13.011	12.5132	11.4532	14.7454	11.2825
7778	HCER(14:0)	Sphingolipids	Hexosylceramide	53808	DMS-MS	100009956			0.0236	0.0147	0.017	0.0252	0.0126	0.0195	0.0211	0.0128	0.0189	0.015	0.0183	0.0212	0.0212	0.0138	0.0168	0.0161	0.0155	0.0138	0.0244	0.0139	0.0112	0.0097	0.0113	0.0146	0.013	0.0135	0.0212	0.0181	0.0175	0.0155	0.0164	0.0192	0.0174	0.0153	0.0083	0.0196	0.0226	0.0197	0.0212	0.0169	0.0205
7779	HCER(16:0)	Sphingolipids	Hexosylceramide	53809	DMS-MS	100009957		HMDB04971	0.8498	0.5683	0.7286	1.1033	0.47	0.597	0.7525	0.607	0.8131	0.57	0.6943	0.5169	0.7203	0.5016	0.5794	0.6474	0.6408	0.5384	0.9787	0.6852	0.4601	0.485	0.5441	0.555	0.6286	0.5613	0.9061	0.8605	0.6289	0.8695	0.6334	0.7228	0.5591	0.6883	0.3176	0.561	0.8782	0.5871	0.9368	0.8189	0.8629
7780	HCER(18:0)	Sphingolipids	Hexosylceramide	53638	DMS-MS	100009786		HMDB04972	0.0926	0.0684	0.1652	0.0975	0.0595	0.0793	0.0971	0.0774	0.1119	0.0668	0.1403	0.0689	0.1048	0.0821	0.0797	0.0951	0.0967	0.0916	0.1261	0.075	0.0601	0.0432	0.0571	0.0742	0.1409	0.0789	0.1342	0.1642	0.1093	0.1374	0.0994	0.0718	0.0765	0.1145	0.0725	0.093	0.1341	0.0908	0.1711	0.1018	0.1346
7781	HCER(18:1)	Sphingolipids	Hexosylceramide	53810	DMS-MS	100009958		HMDB04970	0.0284	0.0221	0.0245	0.0334	0.0206	0.0168	0.0208	0.023	0.0251	0.0175	0.0236	0.0162	0.0272	0.0181	0.019	0.0197	0.0204	0.0205	0.0357	0.0175	0.0143	0.0133	0.0151	0.0184	0.0193	0.0176	0.0284	0.0363	0.024	0.0256	0.018	0.0198	0.0158	0.0206	0.0092	0.022	0.0251	0.0249	0.0263	0.0213	0.0303
7782	HCER(20:0)	Sphingolipids	Hexosylceramide	53639	DMS-MS	100009787		HMDB04973	0.0997	0.0556	0.1063	0.1182	0.0521	0.0806	0.1077	0.0859	0.1251	0.0727	0.1107	0.0838	0.0969	0.0832	0.0749	0.0611	0.0829	0.0904	0.1326	0.0838	0.054	0.0304	0.0551	0.0816	0.0902	0.0809	0.1121	0.1002	0.1088	0.1399	0.0806	0.0871	0.097	0.0844	0.085	0.0897	0.1242	0.0984	0.1489	0.0927	0.1192
7783	HCER(20:1)	Sphingolipids	Hexosylceramide	54510	DMS-MS	100010658			0.0149	0.0097	0.0111	0.0157	0.0097	0.0113	0.0116	0.0109	0.0122	0.0095	0.0095	0.0087	0.0155	0.0088	0.0071	0.0119	0.0085	0.0165	0.0147	0.0079	0.0078	0.0063	0.0051	0.0104	0.0114	0.0083	0.0139	0.0176	0.0103	0.0087	0.0097	0.0109	0.0093	0.0118	0.0056	0.0137	0.0121	0.0137	0.0151	0.0133	0.017
7784	HCER(22:0)	Sphingolipids	Hexosylceramide	53473	DMS-MS	100009621		HMDB04974	0.8725	0.4871	1.0419	1.2273	0.5203	0.5788	1.1562	0.6914	1.006	0.5545	0.8961	0.9344	0.7881	0.7215	0.6117	0.7329	0.8947	0.6391	1.0941	1.1228	0.4605	0.2833	0.4658	0.5266	0.8812	0.6517	0.9197	0.8852	0.9424	0.9342	0.6873	0.6426	0.7316	0.6442	0.474	0.6114	0.9326	0.806	1.2992	0.856	0.8699
7785	HCER(22:1)	Sphingolipids	Hexosylceramide	53474	DMS-MS	100009622			0.096	0.0671	0.0621	0.1199	0.0723	0.0582	0.0689	0.0702	0.0829	0.0505	0.0671	0.0682	0.1123	0.0496	0.0646	0.0821	0.0599	0.1227	0.1128	0.0475	0.0424	0.0323	0.0323	0.0756	0.0629	0.0633	0.0972	0.1139	0.0799	0.0855	0.0589	0.0833	0.0546	0.0641	0.0283	0.0823	0.0834	0.0989	0.0978	0.0802	0.0925
7786	HCER(24:0)	Sphingolipids	Hexosylceramide	54511	DMS-MS	100010659		HMDB04978	1.2659	0.7265	1.2889	1.6538	0.7016	0.8048	1.1973	0.9144	1.2742	0.7487	1.1096	1.1432	1.2208	0.9915	0.8548	0.9816	1.1203	0.9739	1.3854	1.2681	0.6758	0.4168	0.6208	0.6826	1.0642	0.7056	1.2786	1.1441	1.1058	1.2851	1.0596	0.7998	0.9047	0.8412	0.6892	0.7817	1.1167	1.193	1.6981	0.9885	1.0732
7787	HCER(24:1)	Sphingolipids	Hexosylceramide	54512	DMS-MS	100010660		HMDB04975	0.8627	0.4905	0.8116	1.1473	0.3467	0.6322	0.6085	0.5243	0.9818	0.4805	0.7023	0.5632	0.8589	0.586	0.603	0.6552	0.6568	0.6381	0.7939	0.6176	0.3514	0.403	0.4734	0.4916	0.6148	0.5797	0.7934	0.745	0.777	1.0397	0.8291	0.73	0.5744	0.4892	0.5141	0.519	0.7279	0.7649	1.0545	0.7022	0.7707
7788	HCER(26:0)	Sphingolipids	Hexosylceramide	53811	DMS-MS	100009959		HMDB04977	0.0186	0.0121	0.0154	0.0198	0.0136	0.0157	0.0145	0.0171	0.0191	0.0134	0.0131	0.0122	0.0158	0.0142	0.0128	0.0217	0.0149	0.0191	0.0289	0.0143	0.0126	0.0074	0.0086	0.0131	0.0132	0.0114	0.0207	0.0202	0.0173	0.0165	0.0152	0.0137	0.0143	0.0145	0.0092	0.0161	0.0167	0.0208	0.0233	0.0154	0.0205
7789	HCER(26:1)	Sphingolipids	Hexosylceramide	53988	DMS-MS	100010136		HMDB04976	0.0163	0.0101	0.0122	0.015	0.011	0.0121	0.0089	0.012	0.0134	0.0112	0.0122	0.0117	0.0143	0.0087	0.0109	0.0166	0.0123	0.016	0.0178	0.0088	0.0087	0.0059	0.0057	0.0134	0.0105	0.0087	0.0144	0.0169	0.0132	0.0119	0.0117	0.012	0.0103	0.0109	0.0079	0.013	0.0142	0.0161	0.0174	0.0106	0.0141
7790	LCER(14:0)	Sphingolipids	Lactosylceramide	53284	DMS-MS	100009432			0.1064	0.1067	0.1086	0.1393	0.0718	0.1058	0.141	0.0827	0.139	0.0879	0.1192	0.1144	0.154	0.0753	0.0806	0.0644	0.0865	0.101	0.1325	0.057	0.0572	0.0678	0.0481	0.0844	0.0866	0.0761	0.0968	0.0915	0.1521	0.1305	0.1204	0.1244	0.118	0.0723	0.0394	0.084	0.1067	0.1088	0.1371	0.1256	0.1021
7791	LCER(16:0)	Sphingolipids	Lactosylceramide	54141	DMS-MS	100010289		HMDB06750	1.9119	1.8775	2.1196	2.9721	1.4231	2.1242	2.1265	1.3692	2.4552	1.5826	2.1792	1.6279	2.2261	1.2245	1.5221	1.2672	1.8897	1.7753	1.7855	1.6051	1.06	1.6558	1.2513	1.3535	2.0064	1.6502	1.7678	2.6461	2.4138	3.4222	1.9246	1.8469	1.8286	1.9286	1.007	1.3392	1.9672	1.4689	1.8528	2.614	2.1428
7792	LCER(18:0)	Sphingolipids	Lactosylceramide	53475	DMS-MS	100009623		HMDB11591	0.1492	0.1722	0.1355	0.1446	0.1164	0.103	0.1077	0.1213	0.1142	0.1049	0.1285	0.0984	0.1086	0.0878	0.0907	0.1471	0.09	0.1308	0.1727	0.0905	0.0793	0.0838	0.0724	0.1162	0.1042	0.1029	0.1664	0.1895	0.1523	0.1172	0.1092	0.1169	0.1124	0.1139	0.0678	0.1774	0.1982	0.1732	0.1318	0.1474	0.1978
7793	LCER(18:1)	Sphingolipids	Lactosylceramide	53476	DMS-MS	100009624		HMDB11592	0.326	0.3253	0.3369	0.3232	0.303	0.313	0.3375	0.292	0.2843	0.2835	0.3029	0.3596	0.2948	0.2884	0.2693	0.2743	0.2633	0.3123	0.3352	0.2862	0.266	0.2753	0.2587	0.2561	0.2953	0.2813	0.2843	0.3584	0.3264	0.3307	0.3054	0.2625	0.3295	0.3069	0.2365	0.3061	0.3406	0.3084	0.2875	0.3056	0.3427
7794	LCER(20:0)	Sphingolipids	Lactosylceramide	53477	DMS-MS	100009625		HMDB11593	0.0445	0.0526	0.0488	0.0456	0.0479	0.0418	0.0469	0.0459	0.0384	0.0339	0.0475	0.0395	0.05	0.0372	0.0363	0.0359	0.0392	0.0549	0.0581	0.0364	0.042	0.0374	0.0272	0.0334	0.0346	0.0311	0.0471	0.0665	0.0501	0.0533	0.0373	0.0366	0.048	0.0413	0.0305	0.1237	0.0722	0.0501	0.0491	0.0595	0.0668
7795	LCER(20:1)	Sphingolipids	Lactosylceramide	53812	DMS-MS	100009960			0.0585	0.059	0.0618	0.0558	0.0532	0.0547	0.0735	0.0529	0.0529	0.0429	0.0511	0.0496	0.0515	0.0407	0.0469	0.0464	0.0372	0.0557	0.0675	0.0552	0.046	0.0449	0.0313	0.0415	0.0439	0.0491	0.0369	0.0873	0.0547	0.0557	0.0515	0.0388	0.0469	0.0503	0.0217	0.1574	0.0842	0.0646	0.0565	0.0582	0.0655
7796	LCER(22:0)	Sphingolipids	Lactosylceramide	53640	DMS-MS	100009788		HMDB11594	0.0803	0.0728	0.12	0.1355	0.0853	0.0817	0.1381	0.1038	0.0799	0.0689	0.1352	0.0834	0.1384	0.0803	0.0824	0.0892	0.1152	0.1018	0.1417	0.0783	0.0854	0.069	0.0559	0.0568	0.0847	0.0913	0.1072	0.1311	0.1454	0.1273	0.0762	0.0764	0.1274	0.1035	0.065	0.1063	0.1593	0.0938	0.1081	0.1378	0.1296
7797	LCER(22:1)	Sphingolipids	Lactosylceramide	54142	DMS-MS	100010290		HMDB11594	0.0369	0.035	0.0368	0.0457	0.0335	0.0469	0.049	0.0345	0.0339	0.0289	0.0401	0.0365	0.0446	0.0327	0.0336	0.0333	0.0418	0.0384	0.0392	0.0309	0.0302	0.036	0.0267	0.0252	0.0318	0.0367	0.0294	0.0516	0.0485	0.0599	0.036	0.038	0.0389	0.0347	0.0255	0.0413	0.0509	0.0365	0.0336	0.0478	0.0476
7798	LCER(24:0)	Sphingolipids	Lactosylceramide	53989	DMS-MS	100010137		HMDB11595	0.0842	0.0843	0.1096	0.1294	0.0749	0.1064	0.1139	0.0829	0.0882	0.0634	0.1279	0.0988	0.1564	0.0681	0.0873	0.0758	0.1091	0.1135	0.1143	0.0875	0.0676	0.0647	0.0547	0.0504	0.0885	0.0934	0.1045	0.1244	0.1271	0.1557	0.0924	0.0744	0.1274	0.0921	0.0781	0.0947	0.1226	0.0877	0.1093	0.1144	0.1119
7799	LCER(24:1)	Sphingolipids	Lactosylceramide	53478	DMS-MS	100009626		HMDB04872	0.1613	0.193	0.2406	0.3507	0.1198	0.328	0.2508	0.1665	0.2207	0.1543	0.2524	0.2394	0.3605	0.124	0.1981	0.155	0.2856	0.2347	0.2039	0.188	0.1175	0.1713	0.1449	0.1088	0.1961	0.2023	0.1685	0.2663	0.3095	0.4227	0.2683	0.2608	0.2594	0.2143	0.1828	0.1916	0.2538	0.1613	0.2244	0.2635	0.2522
7800	LCER(26:0)	Sphingolipids	Lactosylceramide	53641	DMS-MS	100009789		HMDB04874	0.0141	0.0101	0.0151	0.012	0.0115	0.015	0.012	0.0111	0.0119	0.0092	0.0108	0.0161	0.0142	0.0094	0.0131	0.0104	0.0108	0.0166	0.0164	0.0112	0.0094	0.0091	0.005	0.0126	0.0114	0.0095	0.0102	0.0146	0.0126	0.0134	0.0114	0.0135	0.0129	0.0119	0.0071	0.0128	0.0185	0.0137	0.0124	0.0111	0.0159
7801	LCER(26:1)	Sphingolipids	Lactosylceramide	53642	DMS-MS	100009790		HMDB04873	0.0088	0.0082	0.0107	0.0103	0.0084	0.0095	0.0085	0.0094	0.011	0.0062	0.0083	0.0102	0.0135	0.0073	0.0101	0.0082	0.0077	0.0126	0.0103	0.0098	0.0068	0.0067	0.0042	0.0073	0.0075	0.0068	0.0083	0.0117	0.0092	0.0124	0.0102	0.0105	0.0109	0.0079	0.006	0.0091	0.0141	0.0093	0.0075	0.0108	0.0109
6759	LPC(14:0)	Lysophosphatidylcholine	LPC Ester	53285	DMS-MS	100009433		HMDB10379	1.2028	1.0508	1.0545	1.3667	0.6737	1.2247	1.2646	0.7648	0.9293	0.7847	0.7639	0.8613	1.0403	0.7566	0.7315	1.2535	0.4237	1.0311	0.8413	0.4254	0.4534	0.1601	0.17	0.9038	0.7566	0.4742	1.1114	0.439	0.6917	0.5892	0.8021	0.8794	0.9053	0.6199	0.4507	0.9516	0.875	1.4895	1.8809	0.8761	0.8646
6761	LPC(15:0)	Lysophosphatidylcholine	LPC Ester	53286	DMS-MS	100009434		HMDB10381	0.8641	0.8359	0.8649	0.9832	0.5668	0.7537	0.8643	0.794	0.982	0.5758	0.8155	0.3119	0.8109	0.5886	0.6642	1.0231	0.4178	0.4366	0.8727	0.5515	0.5153	0.2514	0.3726	0.5578	0.6466	0.6728	1.1522	0.8229	0.717	0.6521	0.8909	0.587	0.4903	0.5735	0.2498	1.0241	0.9607	1.2656	0.6761	0.9076	1.0095
6762	LPC(16:0)	Lysophosphatidylcholine	LPC Ester	53287	DMS-MS	100009435	C04102	HMDB10382	123.886	99.9082	91.4128	101.627	63.7591	96.8323	94.753	77.1672	80.5536	63.8097	61.2003	45.7643	117.431	69.1137	104.531	90.6392	75.1039	85.623	96.5921	87.6655	72.5787	36.2424	43.4449	73.6397	75.5228	103.716	97.2764	112.376	65.0448	106.985	84.1548	69.9549	73.7553	79.9182	67.6475	98.7426	95.2801	144.999	83.7579	89.9655	88.5112
6763	LPC(16:1)	Lysophosphatidylcholine	LPC Ester	53479	DMS-MS	100009627		HMDB10383	3.1896	2.8529	2.4613	2.6519	1.6053	2.3426	2.4339	2.0487	1.6865	1.6104	1.6	1.8423	3.5325	2.0601	2.6131	2.1686	1.3835	3.6779	2.1562	2.2643	1.7559	0.7123	1.088	3.3416	1.8537	1.8322	2.7297	1.9677	1.5767	2.4807	2.4787	2.3078	1.6549	2.1888	2.5324	1.9447	4.2422	3.8567	2.1249	2.1657	3.0535
6764	LPC(17:0)	Lysophosphatidylcholine	LPC Ester	54143	DMS-MS	100010291			1.2261	1.5966	1.4442	1.887	0.8739	1.4095	1.4891	1.3045	1.9448	0.623	1.2993	0.4669	1.6321	1.2108	1.2225	1.4568	1.2757	0.8946	1.9302	1.2108	1.1399	0.5494	0.6226	0.8261	1.2932	1.3867	1.8962	2.0895	1.3268	1.1622	1.3777	0.7075	1.0023	0.8404	0.7405	1.7564	1.6608	2.6544	1.4488	1.4088	1.5359
6765	LPC(18:0)	Lysophosphatidylcholine	LPC Ester	54144	DMS-MS	100010292		HMDB10384	32.3293	27.07	25.8868	33.4541	13.4224	24.377	28.6135	23.3088	21.4679	10.8536	19.9881	10.7946	31.2887	18.4321	25.9658	24.5821	29.1294	20.6271	32.0879	23.5561	21.8666	8.7913	10.0887	17.2356	23.4787	28.9936	25.2142	27.552	18.3239	26.6227	19.4804	19.7971	20.2133	24.3574	20.3343	28.961	30.4864	46.996	29.677	26.4006	25.4641
6766	LPC(18:1)	Lysophosphatidylcholine	LPC Ester	54145	DMS-MS	100010293			17.4008	21.4161	20.3822	19.8705	9.2243	22.1721	25.9402	15.0161	17.7927	8.3902	16.4023	8.921	35.5789	11.9696	22.9912	13.226	18.9579	18.218	14.8243	21.479	11.9055	5.0219	7.5697	14.8067	14.6649	24.1035	14.6783	20.8835	15.5677	22.8164	16.9322	9.4455	14.658	12.2618	14.2394	20.1582	25.2671	26.8964	20.31	16.1028	16.4635
6767	LPC(18:2)	Lysophosphatidylcholine	LPC Ester	54331	DMS-MS	100010479			16.3765	18.3436	19.1115	17.0775	15.8575	26.2214	31.083	19.7133	34.4311	9.1885	19.8436	13.712	62.3215	18.0007	39.0428	13.0258	18.4279	19.7948	16.6228	31.4464	16.9501	4.5516	9.2616	21.887	26.1367	25.2987	13.9233	25.713	19.9794	22.626	20.4113	9.0326	15.5248	18.6347	16.9027	32.0058	25.6007	30.1674	32.7423	18.5244	17.8262
6768	LPC(18:3)	Lysophosphatidylcholine	LPC Ester	54513	DMS-MS	100010661		HMDB10388	0.3153	0.3372	0.2269	0.216	0.1715	0.2718	0.3068	0.1736	0.3197	0.1174	0.3445	0.1511	0.6901	0.301	0.3699	0.2971	0.3204	0.3469	0.3066	0.3701	0.2044	0.1082	0.1155	0.2595	0.2769	0.2308	0.3187	0.1785	0.2127	0.4383	0.1598	0.2796	0.2259	0.2333	0.3475	0.2314	0.3919	0.5127	0.2084	0.2208	0.2499
6770	LPC(20:0)	Lysophosphatidylcholine	LPC Ester	53480	DMS-MS	100009628		HMDB10390	0.1451	0.171	0.1542	0.1984	0.0882	0.1359	0.2039	0.1616	0.1265	0.1107	0.1187	0.0873	0.1983	0.1183	0.131	0.1253	0.1831	0.1169	0.1926	0.1659	0.1121	0.0873	0.0967	0.1189	0.1245	0.1754	0.1695	0.1552	0.1127	0.2102	0.111	0.126	0.1339	0.1083	0.1285	0.1228	0.144	0.2044	0.1356	0.1104	0.1385
6771	LPC(20:1)	Lysophosphatidylcholine	LPC Ester	53813	DMS-MS	100009961		HMDB10391	0.1802	0.2117	0.1935	0.205	0.1098	0.2047	0.1989	0.1502	0.1116	0.0916	0.1154	0.0981	0.3031	0.133	0.2425	0.1176	0.3174	0.1189	0.1345	0.224	0.1273	0.0766	0.0832	0.1853	0.1139	0.3131	0.1012	0.1597	0.1879	0.2497	0.1562	0.12	0.2008	0.0746	0.1366	0.18	0.1236	0.2693	0.1796	0.1279	0.1175
6772	LPC(20:2)	Lysophosphatidylcholine	LPC Ester	53990	DMS-MS	100010138		HMDB10392	0.23	0.276	0.2483	0.2738	0.2019	0.3116	0.2918	0.1994	0.2249	0.1443	0.1845	0.1766	0.4812	0.2419	0.3548	0.2192	0.186	0.2807	0.1907	0.2396	0.1871	0.1035	0.0874	0.5084	0.2729	0.2487	0.2166	0.1908	0.1874	0.2605	0.2353	0.1786	0.2209	0.2052	0.2043	0.2163	0.2953	0.4267	0.3304	0.1682	0.2066
6773	LPC(20:3)	Lysophosphatidylcholine	LPC Ester	54146	DMS-MS	100010294		HMDB10394	1.8083	1.7017	1.6551	1.5475	1.4084	1.6143	1.5845	1.6362	1.5653	0.8792	1.5226	0.9829	2.183	1.3291	1.6378	1.8493	0.8711	1.5593	1.3346	1.2477	1.1946	0.4764	0.4417	2.5543	1.1766	1.3921	2.0124	1.8206	0.9088	1.2682	1.2608	1.6806	1.5327	1.5433	1.2445	1.506	2.4757	3.0747	1.8351	1.2055	1.5259
6774	LPC(20:4)	Lysophosphatidylcholine	LPC Ester	53481	DMS-MS	100009629		HMDB10395	2.3505	3.4708	2.6269	2.9826	1.629	3.359	3.0307	2.8255	3.2782	1.8006	2.529	1.0693	3.9789	2.2482	3.0351	2.9725	1.8353	2.3291	2.7204	3.0526	1.4925	1.6155	1.009	1.6717	1.9252	2.2742	2.2384	3.7698	1.837	2.6675	1.8039	1.8279	2.3777	1.4475	3.1196	3.0483	3.3507	3.6296	2.5739	2.539	2.1006
6775	LPC(20:5)	Lysophosphatidylcholine	LPC Ester	53644	DMS-MS	100009792		HMDB10397	0.2185	0.1321	0.1321	0.116	0.2126	0.1957	0.1646	0.1959	0.2354	0.1119	0.1381	0.0383	0.2928	0.2338	0.2388	0.3813	0.4429	0.1793	0.2319	0.1716	0.4663	0.0559	0.0383	0.0847	0.0383	0.1054	0.1742	0.1028	0.2915	0.1671	0.0749	0.147	0.0855	0.0959	0.1388	0.2124	0.3409	0.477	0.1271	0.1188	0.1052
6779	LPC(22:4)	Lysophosphatidylcholine	LPC Ester	53815	DMS-MS	100009963		HMDB10401	0.0792	0.0512	0.0356	0.0356	0.0356	0.0356	0.0823	0.1011	0.0656	0.0356	0.0761	0.0356	0.1084	0.0806	0.0851	0.0826	0.0356	0.078	0.0356	0.0673	0.0356	0.0356	0.0356	0.091	0.0356	0.0356	0.0565	0.0356	0.0356	0.0356	0.0356	0.0356	0.0602	0.0356	0.0862	0.0356	0.0957	0.1126	0.0763	0.0356	0.0577
6780	LPC(22:5)	Lysophosphatidylcholine	LPC Ester	54333	DMS-MS	100010481		HMDB10403	0.1457	0.2102	0.1722	0.1648	0.1429	0.1703	0.174	0.1478	0.2266	0.0877	0.1779	0.0764	0.3358	0.1666	0.1984	0.1779	0.1432	0.1733	0.19	0.129	0.1799	0.0724	0.1043	0.1606	0.113	0.1233	0.1789	0.2322	0.1487	0.1311	0.0947	0.1739	0.1456	0.1648	0.2076	0.2163	0.1768	0.378	0.2135	0.1254	0.1259
6781	LPC(22:6)	Lysophosphatidylcholine	LPC Ester	53645	DMS-MS	100009793		HMDB10404	0.3587	0.3309	0.2483	0.2513	0.1748	0.3678	0.2469	0.1633	0.3074	0.1629	0.1974	0.1177	0.5017	0.2096	0.3296	0.421	0.4621	0.1364	0.287	0.189	0.2562	0.1195	0.1071	0.2948	0.2584	0.2773	0.1983	0.196	0.2261	0.2856	0.1805	0.202	0.2326	0.2892	0.2476	0.2988	0.238	0.576	0.3745	0.1863	0.1849
7016	LPE(14:0)	Lysophosphatidylethanolamine	LPE Ester	53483	DMS-MS	100009631		HMDB11500	0.017	0.017	0.017	0.017	0.017	0.017	0.017	0.017	0.017	0.017	0.017	0.017	0.017	0.017	0.017	0.017	0.017	0.017	0.017	0.017	0.017	0.017	0.017	0.017	0.0185	0.017	0.017	0.017	0.0209	0.017	0.017	0.017	0.017	0.017	0.017	0.017	0.017	0.017	0.025	0.017	0.017
7018	LPE(15:0)	Lysophosphatidylethanolamine	LPE Ester	53646	DMS-MS	100009794		HMDB11502	0.0106	0.0106	0.0106	0.0106	0.0106	0.0106	0.0106	0.0106	0.0106	0.0106	0.0106	0.0106	0.0106	0.0106	0.0106	0.0106	0.0106	0.0106	0.0106	0.0106	0.0106	0.0106	0.0106	0.0106	0.0106	0.0106	0.0169	0.0106	0.0171	0.0106	0.0106	0.0106	0.0106	0.0106	0.0106	0.0106	0.0106	0.0106	0.0106	0.0106	0.0106
7019	LPE(16:0)	Lysophosphatidylethanolamine	LPE Ester	54516	DMS-MS	100010664		HMDB11503	1.5113	1.2313	1.1425	1.5007	0.9182	1.1938	1.3108	0.9315	1.2291	1.4056	1.2139	0.4905	1.5711	1.0733	1.4626	1.4347	1.1746	1.5673	1.3508	1.1389	0.9471	0.4433	0.532	1.4773	1.1621	1.2365	1.3857	1.4638	1.3095	1.3626	0.8905	0.8784	1.3949	1.0609	1.1576	1.3908	1.5299	1.9909	1.3922	0.8664	0.9944
7020	LPE(16:1)	Lysophosphatidylethanolamine	LPE Ester	54147	DMS-MS	100010295		HMDB11474	0.0884	0.0563	0.0555	0.0539	0.0601	0.0464	0.0634	0.0331	0.0521	0.0671	0.0719	0.0382	0.0782	0.0342	0.0603	0.0627	0.0193	0.2231	0.0371	0.0427	0.0186	0.0151	0.0271	0.1723	0.0597	0.0276	0.0977	0.0452	0.0521	0.0454	0.037	0.113	0.055	0.0473	0.0869	0.0511	0.1076	0.1137	0.0547	0.0459	0.0993
7021	LPE(17:0)	Lysophosphatidylethanolamine	LPE Ester	53993	DMS-MS	100010141			0.0297	0.0384	0.0274	0.0554	0.0209	0.0471	0.0471	0.0359	0.0583	0.0312	0.0522	0.0173	0.0539	0.041	0.0348	0.0447	0.0381	0.04	0.0546	0.0316	0.0264	0.0214	0.0129	0.0373	0.0343	0.0371	0.0606	0.0466	0.0579	0.0345	0.0351	0.0238	0.0301	0.0252	0.0206	0.0583	0.0611	0.0583	0.0378	0.0358	0.0438
7022	LPE(18:0)	Lysophosphatidylethanolamine	LPE Ester	53484	DMS-MS	100009632		HMDB11130	1.5033	1.1952	1.1073	1.5099	0.6852	1.0139	1.0997	1.0673	1.1934	0.7743	1.0724	0.4303	1.632	0.8784	1.2605	1.3454	1.0845	1.5495	1.4926	1.2078	0.9251	0.458	0.3856	1.0698	1.0269	1.2699	1.2958	1.5944	1.0558	1.1618	0.8686	0.8139	1.0774	0.9268	1.0776	1.5789	1.7289	1.7804	1.4384	0.9735	1.0039
7023	LPE(18:1)	Lysophosphatidylethanolamine	LPE Ester	53288	DMS-MS	100009436		HMDB11476	1.291	1.5752	1.2612	0.9088	0.7257	0.7092	1.5705	0.9426	1.4517	0.8406	1.2989	0.4043	2.3401	0.4586	2.0013	0.6881	0.7312	1.7467	0.8862	1.6298	0.6369	0.2313	0.3344	1.5768	1.0714	1.4332	0.8812	2.1959	1.3451	0.9755	0.5185	0.5042	0.9778	0.6525	0.9421	2.8568	2.259	1.6091	2.0248	1.023	1.1609
7024	LPE(18:2)	Lysophosphatidylethanolamine	LPE Ester	53817	DMS-MS	100009965		HMDB11477	1.2445	0.9314	1.0934	1.0569	1.1458	0.8636	1.5748	0.844	2.0999	0.6609	1.4952	0.8598	2.529	0.8274	2.1241	0.8054	0.7875	2.4032	1.0271	1.7049	0.7217	0.1649	0.5715	1.8663	1.8554	1.2205	1.173	1.7506	1.2382	1.1618	0.9404	0.6802	1.0808	1.1172	1.043	2.735	1.6832	1.6692	3.0063	0.9932	1.2778
7025	LPE(18:3)	Lysophosphatidylethanolamine	LPE Ester	54517	DMS-MS	100010665		HMDB11479	0.0183	0.0149	0.0201	0.0093	0.016	0.015	0.0223	0.0131	0.0453	0.0178	0.0256	0.0204	0.0408	0.0166	0.0232	0.0093	0.0215	0.0385	0.0196	0.0237	0.0093	0.0093	0.0126	0.0256	0.0354	0.0093	0.0226	0.0093	0.0146	0.0313	0.0093	0.0093	0.0162	0.0216	0.0285	0.0288	0.0264	0.0221	0.0152	0.0175	0.0193
7028	LPE(20:1)	Lysophosphatidylethanolamine	LPE Ester	53647	DMS-MS	100009795		HMDB11482	0.0133	0.0134	0.0238	0.0133	0.0133	0.0133	0.0199	0.0133	0.0151	0.0133	0.0169	0.0133	0.0354	0.0144	0.0632	0.0167	0.0271	0.0198	0.0133	0.0165	0.0133	0.0133	0.0133	0.0278	0.0201	0.0201	0.0188	0.0133	0.0209	0.0133	0.0133	0.0133	0.0208	0.0133	0.0162	0.0189	0.0157	0.0262	0.0133	0.0133	0.0133
7029	LPE(20:2)	Lysophosphatidylethanolamine	LPE Ester	53818	DMS-MS	100009966		HMDB11483	0.0181	0.0157	0.0245	0.0123	0.0218	0.0154	0.0156	0.0176	0.0182	0.0129	0.0211	0.0123	0.023	0.0141	0.0279	0.0123	0.0123	0.0295	0.0214	0.018	0.0167	0.0123	0.0123	0.0428	0.0189	0.0188	0.0152	0.0268	0.0206	0.0123	0.0123	0.0123	0.0168	0.02	0.0174	0.0241	0.0222	0.0181	0.0202	0.0167	0.0176
7030	LPE(20:3)	Lysophosphatidylethanolamine	LPE Ester	54334	DMS-MS	100010482		HMDB11486	0.1227	0.1026	0.1301	0.1227	0.1259	0.0852	0.1112	0.1076	0.1272	0.0799	0.1451	0.0956	0.1121	0.0877	0.0955	0.1411	0.0417	0.1948	0.1042	0.083	0.0711	0.0351	0.0322	0.2066	0.1038	0.0984	0.1687	0.1418	0.0884	0.0923	0.0767	0.1139	0.1553	0.1059	0.1256	0.1245	0.1804	0.1847	0.1864	0.0881	0.1169
7031	LPE(20:4)	Lysophosphatidylethanolamine	LPE Ester	53485	DMS-MS	100009633		HMDB11487	0.367	0.4816	0.5012	0.436	0.3891	0.3855	0.4157	0.3922	0.5909	0.3769	0.4615	0.2411	0.5211	0.333	0.4248	0.4756	0.2588	0.7082	0.4826	0.479	0.1978	0.2084	0.2088	0.377	0.4648	0.4041	0.5054	0.6412	0.4737	0.4826	0.2652	0.3276	0.4439	0.2736	0.6619	0.6381	0.6107	0.4416	0.7775	0.3981	0.4221
7032	LPE(20:5)	Lysophosphatidylethanolamine	LPE Ester	53994	DMS-MS	100010142		HMDB11489	0.022	0.01	0.0133	0.01	0.0265	0.01	0.01	0.0209	0.01	0.0189	0.0204	0.01	0.0279	0.018	0.022	0.0317	0.0359	0.0289	0.0215	0.0193	0.0338	0.01	0.01	0.01	0.01	0.01	0.0233	0.01	0.0576	0.0189	0.01	0.01	0.01	0.01	0.0178	0.0214	0.0345	0.0431	0.0182	0.0129	0.01
7036	LPE(22:4)	Lysophosphatidylethanolamine	LPE Ester	53487	DMS-MS	100009635		HMDB11493	0.0115	0.0178	0.0116	0.0166	0.0115	0.0115	0.0115	0.0155	0.025	0.0115	0.0228	0.0167	0.023	0.0115	0.0115	0.0115	0.0115	0.039	0.0115	0.0115	0.0182	0.0115	0.0115	0.027	0.0115	0.0115	0.0221	0.0115	0.0149	0.0115	0.0115	0.0201	0.0182	0.0125	0.0201	0.0156	0.022	0.0217	0.0115	0.0115	0.0211
7037	LPE(22:5)	Lysophosphatidylethanolamine	LPE Ester	54519	DMS-MS	100010667		HMDB11495	0.0354	0.0378	0.0441	0.0544	0.0431	0.0333	0.0356	0.0439	0.061	0.0393	0.062	0.0362	0.0372	0.0532	0.0338	0.0452	0.02	0.0841	0.0485	0.0382	0.0314	0.0232	0.0244	0.0505	0.0396	0.0414	0.0863	0.0602	0.0394	0.0349	0.0212	0.0518	0.0473	0.0379	0.0777	0.0458	0.0566	0.0757	0.0514	0.0324	0.0464
7038	LPE(22:6)	Lysophosphatidylethanolamine	LPE Ester	53649	DMS-MS	100009797		HMDB11496	0.1383	0.097	0.0864	0.1241	0.0987	0.1028	0.0933	0.0916	0.1035	0.1131	0.0768	0.0484	0.094	0.1116	0.1055	0.1811	0.1077	0.0901	0.1309	0.0708	0.0807	0.0465	0.0494	0.1164	0.1045	0.0987	0.1267	0.0746	0.1049	0.1297	0.0575	0.1003	0.1404	0.1405	0.133	0.0908	0.1068	0.1688	0.16	0.0548	0.069
10383	MAG(12:0)	MAG	Ester	62002	DMS-MS	100020128			0.0393	0.0284	0.0209	0.0216	0.0225	0.0339	0.0395	0.0246	0.0298	0.0297	0.0261	0.0263	0.0327	0.0205	0.0355	0.0254	0.0344	0.0706	0.0356	0.0439	0.0295	0.0291	0.021	0.0298	0.0155	0.027	0.0182	0.0416	0.026	0.0254	0.0329	0.0239	0.0268	0.0229	0.025	0.0323	0.0304	0.0238	0.0541	0.0329	0.0349
10384	MAG(14:0)	MAG	Ester	62028	DMS-MS	100020155			0.0434	0.0426	0.0299	0.0363	0.0288	0.0354	0.0395	0.0286	0.0426	0.0369	0.0301	0.0336	0.0347	0.0314	0.0338	0.0563	0.0336	0.0595	0.0358	0.0409	0.0321	0.026	0.0268	0.0473	0.0365	0.0342	0.0445	0.0343	0.0395	0.0294	0.0371	0.0495	0.0298	0.0351	0.0522	0.0392	0.0396	0.0285	0.0559	0.032	0.0501
10385	MAG(14:1)	MAG	Ester	62004	DMS-MS	100020131			0.1339	0.1207	0.1187	0.0981	0.1114	0.1285	0.1122	0.1657	0.1202	0.1737	0.11	0.1131	0.1235	0.1128	0.1283	0.1228	0.1047	0.1684	0.1168	0.1348	0.1163	0.1138	0.1062	0.2002	0.2175	0.1172	0.1037	0.1365	0.1064	0.0933	0.1227	0.102	0.0896	0.0887	0.2821	0.1212	0.1384	0.1155	0.1477	0.1021	0.1074
10386	MAG(15:0)	MAG	Ester	62005	DMS-MS	100020132			5.7166	4.6644	4.3826	4.7884	4.2459	4.5026	5.0304	17.6558	4.9224	17.9991	4.1639	3.7077	4.3741	3.7258	5.1158	5.006	4.3953	5.8596	5.3129	5.2828	4.7592	5.0828	6.4361	24.9553	23.6709	4.9083	6.1791	6.772	3.7706	3.8815	5.1024	4.0856	3.9364	3.7537	9.9651	5.2829	5.387	4.3688	13.546	4.9819	4.6841
10387	MAG(16:0)	MAG	Ester	62006	DMS-MS	100020133			0.5302	0.4804	0.4327	0.4807	0.4634	0.4666	0.4473	0.6357	0.5145	0.6306	0.4853	0.4451	0.4895	0.3979	0.5437	0.5844	0.4782	0.5832	0.6089	0.5061	0.4498	0.4756	0.476	0.7081	0.7604	0.5309	0.5226	0.5375	0.418	0.4414	0.5139	0.4958	0.4487	0.44	0.7389	0.5419	0.5217	0.443	0.5827	0.4904	0.5447
10388	MAG(16:1)	MAG	Ester	62007	DMS-MS	100020134			1.8427	1.7011	1.4033	1.6275	1.2798	1.5806	1.4855	2.8564	1.981	2.8904	1.7403	1.4323	1.4736	1.1738	1.9108	1.6834	1.4116	1.6998	2.1717	1.8471	1.614	1.5409	1.4433	3.078	3.7591	1.787	1.3804	2.1986	1.2838	1.4039	2.0535	1.442	1.0779	1.2745	3.7019	1.9771	2.0354	1.2361	2.3062	1.6889	1.886
10389	MAG(17:0)	MAG	Ester	62008	DMS-MS	100020135			0.0252	0.0173	0.0238	0.03	0.0235	0.0199	0.0189	0.0234	0.0245	0.0217	0.022	0.0208	0.0228	0.0216	0.0215	0.0209	0.0175	0.022	0.0241	0.0236	0.022	0.0176	0.0177	0.0182	0.0218	0.0192	0.0234	0.032	0.028	0.017	0.0218	0.0171	0.0218	0.0164	0.0178	0.0277	0.0202	0.0281	0.0211	0.0192	0.0245
10390	MAG(18:0)	MAG	Ester	62009	DMS-MS	100020136			0.2368	0.2224	0.2387	0.2495	0.2486	0.2535	0.2597	0.2356	0.2993	0.2555	0.2646	0.2546	0.2737	0.2549	0.268	0.2729	0.2874	0.2891	0.2869	0.2432	0.275	0.2932	0.2888	0.2665	0.2555	0.2862	0.2578	0.2793	0.2478	0.2792	0.2487	0.283	0.2641	0.2772	0.3017	0.2712	0.3082	0.2483	0.2733	0.2677	0.2661
10391	MAG(18:1)	MAG	Ester	62010	DMS-MS	100020137			0.2416	0.2441	0.0872	0.1952	0.1048	0.0891	0.0623	0.0996	0.0794	0.1195	0.0955	0.059	0.0637	0.063	0.1027	0.4757	0.1111	0.3154	0.2373	0.3391	0.1538	0.0815	0.0714	0.1941	0.0752	0.1682	0.3121	0.3679	0.089	0.0786	0.1208	0.1851	0.0837	0.0996	0.0912	0.4009	0.105	0.185	0.3365	0.0884	0.3327
10392	MAG(18:2)	MAG	Ester	62011	DMS-MS	100020138			0.1333	0.0945	0.0611	0.1149	0.1131	0.0694	0.0463	0.0673	0.0789	0.0789	0.0646	0.0517	0.0617	0.0504	0.0738	0.2587	0.0834	0.1566	0.172	0.2409	0.1348	0.0719	0.0532	0.1255	0.0644	0.1077	0.2174	0.2106	0.0663	0.052	0.0718	0.0958	0.0563	0.0808	0.0714	0.253	0.054	0.1169	0.2326	0.0518	0.1771
10393	MAG(18:3)	MAG	Ester	62012	DMS-MS	100020139			0.1329	0.0848	0.0878	0.1177	0.0895	0.1034	0.0916	0.0849	0.0951	0.0721	0.0928	0.0723	0.0906	0.0532	0.0653	0.1267	0.0812	0.0785	0.1302	0.0983	0.0851	0.0528	0.0575	0.0888	0.0836	0.0823	0.1175	0.1326	0.0874	0.0877	0.0828	0.1065	0.0733	0.0839	0.0398	0.1067	0.1121	0.1297	0.099	0.0981	0.1312
10394	MAG(18:4)	MAG	Ester	62013	DMS-MS	100020140			0.018	0.0153	0.0177	0.0194	0.0182	0.0193	0.0192	0.0232	0.0148	0.0163	0.0138	0.0197	0.0165	0.0137	0.0172	0.0278	0.018	0.0171	0.022	0.0189	0.0205	0.012	0.0108	0.0226	0.0159	0.0228	0.0211	0.0234	0.0181	0.0123	0.0157	0.0197	0.012	0.0123	0.0119	0.02	0.0241	0.0138	0.0251	0.0227	0.0228
10395	MAG(20:0)	MAG	Ester	62014	DMS-MS	100020141			0.0645	0.0479	0.0401	0.0513	0.0426	0.0478	0.0515	0.0668	0.0563	0.0578	0.0372	0.0437	0.0617	0.0434	0.0544	0.0504	0.0401	0.0509	0.0473	0.0492	0.0491	0.0543	0.0622	0.0913	0.0526	0.0378	0.0479	0.0612	0.037	0.0437	0.0371	0.0465	0.0349	0.0374	0.0464	0.058	0.0568	0.0591	0.0646	0.0531	0.0422
10396	MAG(20:1)	MAG	Ester	62015	DMS-MS	100020142			0.0199	0.0184	0.0173	0.0162	0.0144	0.0226	0.0205	0.0169	0.0168	0.0148	0.0148	0.0127	0.0199	0.0124	0.0206	0.0174	0.0149	0.0209	0.0189	0.0148	0.0152	0.0168	0.0127	0.0202	0.0201	0.0154	0.0161	0.0218	0.0125	0.0187	0.0153	0.013	0.0168	0.0169	0.0128	0.0226	0.019	0.0203	0.016	0.0146	0.0218
10397	MAG(20:2)	MAG	Ester	62016	DMS-MS	100020143			0.0267	0.0206	0.0172	0.02	0.0208	0.0237	0.022	0.0226	0.0254	0.0175	0.0219	0.0151	0.0205	0.0152	0.0233	0.026	0.0186	0.0205	0.0221	0.0241	0.0198	0.0199	0.0144	0.0292	0.0234	0.0228	0.0228	0.0304	0.0201	0.0203	0.0206	0.0169	0.0138	0.0227	0.0221	0.0257	0.0252	0.0184	0.0208	0.0237	0.021
10398	MAG(20:3)	MAG	Ester	62017	DMS-MS	100020144			0.0206	0.0208	0.0178	0.0131	0.0167	0.0173	0.0157	0.0187	0.0168	0.0132	0.0137	0.0153	0.0164	0.015	0.0134	0.0141	0.0151	0.0295	0.0238	0.0171	0.0148	0.0146	0.0123	0.0204	0.0126	0.0157	0.0178	0.0195	0.0137	0.0133	0.0171	0.0172	0.014	0.0153	0.0119	0.0205	0.0156	0.0203	0.0176	0.0172	0.0199
10399	MAG(20:4)	MAG	Ester	62018	DMS-MS	100020145			0.0298	0.0199	0.019	0.0242	0.0173	0.019	0.0195	0.0254	0.0174	0.0167	0.0164	0.0198	0.0262	0.0142	0.0117	0.0262	0.0151	0.0249	0.0232	0.0195	0.0218	0.0164	0.0093	0.0233	0.0179	0.0154	0.0217	0.0291	0.0181	0.0175	0.0214	0.0138	0.0134	0.0177	0.0152	0.0184	0.0151	0.023	0.0193	0.0187	0.0257
10400	MAG(20:5)	MAG	Ester	62019	DMS-MS	100020146			0.0315	0.0287	0.0249	0.023	0.028	0.0279	0.0303	0.0529	0.0254	0.0474	0.028	0.0179	0.0359	0.0248	0.0238	0.0238	0.0193	0.0317	0.023	0.0253	0.0292	0.0283	0.0227	0.0663	0.0558	0.0283	0.0242	0.0412	0.028	0.0228	0.0228	0.0193	0.0184	0.0169	0.0274	0.0358	0.0259	0.0222	0.0424	0.0222	0.0308
10401	MAG(22:0)	MAG	Ester	62020	DMS-MS	100020147			0.0197	0.0193	0.0127	0.0222	0.0163	0.0192	0.0184	0.0164	0.0196	0.0186	0.0189	0.0154	0.0159	0.0149	0.0184	0.0203	0.0122	0.0223	0.0237	0.0164	0.0143	0.0183	0.0147	0.0184	0.0199	0.0183	0.017	0.0218	0.0199	0.0151	0.0158	0.0184	0.016	0.0128	0.0101	0.0233	0.0154	0.02	0.0211	0.0135	0.0199
10402	MAG(22:1)	MAG	Ester	62021	DMS-MS	100020148			0.0311	0.0231	0.0265	0.0338	0.0209	0.0354	0.0301	0.02	0.0323	0.026	0.0247	0.0294	0.0292	0.0195	0.0293	0.0303	0.0239	0.0243	0.0402	0.0265	0.026	0.0185	0.0164	0.0217	0.019	0.0346	0.0215	0.0266	0.0287	0.0312	0.0316	0.0234	0.0158	0.0237	0.0188	0.0275	0.031	0.0215	0.0196	0.0232	0.0299
10403	MAG(22:2)	MAG	Ester	62022	DMS-MS	100020149			0.0249	0.0284	0.0256	0.0268	0.0275	0.0205	0.0221	0.0215	0.0278	0.0198	0.0255	0.0212	0.027	0.0207	0.0246	0.0281	0.022	0.0209	0.0243	0.0249	0.0215	0.0232	0.019	0.0226	0.0147	0.0248	0.019	0.0284	0.024	0.0262	0.0247	0.02	0.0194	0.0169	0.0163	0.0271	0.0313	0.0262	0.0222	0.0217	0.0287
10404	MAG(22:4)	MAG	Ester	62023	DMS-MS	100020150			0.0141	0.0134	0.0158	0.0201	0.012	0.0197	0.0168	0.0138	0.01	0.0133	0.0125	0.0143	0.0155	0.0098	0.0111	0.0187	0.0229	0.0114	0.0166	0.0144	0.0211	0.0088	0.0107	0.0145	0.0145	0.0131	0.0149	0.0172	0.0128	0.0156	0.0111	0.0119	0.0122	0.0119	0.0084	0.0156	0.0178	0.0084	0.0121	0.0146	0.0174
10405	MAG(22:5)	MAG	Ester	62024	DMS-MS	100020151			0.0198	0.014	0.0178	0.0176	0.0117	0.0148	0.0133	0.0281	0.0163	0.0289	0.013	0.0129	0.0188	0.0128	0.0142	0.0187	0.0135	0.0162	0.0164	0.0216	0.018	0.015	0.012	0.0342	0.0286	0.0136	0.0165	0.0225	0.0181	0.0128	0.0139	0.0124	0.0139	0.014	0.0145	0.017	0.0181	0.0171	0.0232	0.0154	0.017
10406	MAG(22:6)	MAG	Ester	62025	DMS-MS	100020152			0.018	0.0194	0.0194	0.0208	0.02	0.0169	0.0211	0.0733	0.0246	0.087	0.0169	0.0176	0.0184	0.0137	0.0152	0.0223	0.0168	0.0196	0.025	0.0182	0.0199	0.0172	0.0157	0.0939	0.0989	0.0203	0.0334	0.0265	0.0216	0.0184	0.0234	0.0216	0.0182	0.0187	0.025	0.0213	0.018	0.0252	0.0653	0.0181	0.02
10407	MAG(24:0)	MAG	Ester	62026	DMS-MS	100020153			0.0132	0.0155	0.0121	0.0197	0.0148	0.0128	0.0142	0.0106	0.0108	0.0108	0.0107	0.0141	0.0168	0.0119	0.0102	0.0123	0.0085	0.0166	0.0228	0.0117	0.0122	0.0121	0.0086	0.0161	0.0139	0.0167	0.0139	0.0182	0.0169	0.0181	0.0197	0.015	0.0141	0.0123	0.0072	0.0198	0.023	0.0182	0.0171	0.0114	0.0203
10408	MAG(24:1)	MAG	Ester	62027	DMS-MS	100020154			0.0218	0.0158	0.0163	0.0185	0.0106	0.0166	0.0167	0.0116	0.0155	0.0159	0.0172	0.0074	0.0166	0.0169	0.021	0.0166	0.0128	0.0174	0.0171	0.0114	0.0161	0.0123	0.01	0.0116	0.0168	0.0164	0.0179	0.0169	0.0162	0.0157	0.0184	0.0138	0.0115	0.0124	0.0099	0.0154	0.0181	0.0216	0.016	0.0124	0.0188
6538	PC(12:0/16:1)	Phosphatidylcholine	PC Ester	53820	DMS-MS	100009968			0.1034	0.1034	0.1034	0.1034	0.1034	0.1034	0.1034	0.1034	0.1034	0.1034	0.1034	0.1034	0.1034	0.1034	0.1034	0.1034	0.1034	0.1034	0.1034	0.1034	0.1034	0.1034	0.1034	0.1034	0.1034	0.1034	0.1034	0.1034	0.1034	0.1034	0.1034	0.1034	0.1034	0.1034	0.1034	0.1034	0.1034	0.1034	0.1034	0.1034	0.1034
6539	PC(12:0/18:1)	Phosphatidylcholine	PC Ester	54335	DMS-MS	100010483			0.2635	0.2853	0.1915	0.4245	0.111	0.4196	0.5685	0.1979	0.2237	0.2861	0.1994	0.1763	0.111	0.111	0.2445	0.2246	0.3152	0.3282	0.111	0.179	0.2207	0.111	0.111	0.3162	0.179	0.111	0.1933	0.111	0.36	0.1694	0.111	0.214	0.3444	0.111	0.1889	0.2406	0.2448	0.21	0.9419	0.1963	0.1734
6540	PC(12:0/18:2)	Phosphatidylcholine	PC Ester	53290	DMS-MS	100009438			0.1362	0.1362	0.1362	0.1362	0.1362	0.2181	0.3232	0.1573	0.1778	0.1362	0.1362	0.2762	0.2294	0.1362	0.1704	0.1573	0.2018	0.2041	0.1362	0.1362	0.1362	0.1362	0.1362	0.2535	0.1441	0.1362	0.1504	0.1362	0.1832	0.1362	0.1362	0.1362	0.2691	0.1362	0.2378	0.1362	0.1362	0.145	0.7154	0.1564	0.1818
6544	PC(12:0/20:2)	Phosphatidylcholine	PC Ester	53292	DMS-MS	100009440			0.0976	0.0976	0.0976	0.0976	0.0976	0.2496	0.0976	0.1819	0.1475	0.0976	0.1588	0.0976	0.0976	0.0976	0.0976	0.1449	0.0976	0.0976	0.0976	0.0976	0.0976	0.0976	0.0976	0.0976	0.0976	0.0976	0.0976	0.0976	0.1376	0.1679	0.0976	0.0976	0.0976	0.0976	0.0976	0.0976	0.0976	0.1541	0.0976	0.0976	0.1717
6552	PC(14:0/14:0)	Phosphatidylcholine	PC Ester	53293	DMS-MS	100009441		HMDB07866	0.163	0.0788	0.0946	0.1914	0.0725	0.1808	0.242	0.0816	0.1404	0.1811	0.2871	0.3543	0.166	0.0972	0.109	0.1652	0.0537	0.1525	0.1103	0.0537	0.0537	0.0537	0.0537	0.15	0.1091	0.0537	0.1365	0.0537	0.1733	0.0537	0.1075	0.1633	0.1614	0.0786	0.0602	0.164	0.1005	0.1431	0.4263	0.0982	0.1165
6554	PC(14:0/16:1)	Phosphatidylcholine	PC Ester	54151	DMS-MS	100010299		HMDB07870	0.538	0.1999	0.3515	0.3827	0.2664	0.3544	0.4456	0.2374	0.2969	0.5755	0.4181	0.445	0.4521	0.3164	0.1839	0.3936	0.1714	0.7447	0.3299	0.1668	0.196	0.0991	0.0991	0.7589	0.2708	0.1844	0.4447	0.2855	0.2841	0.221	0.4391	0.5721	0.333	0.3057	0.3256	0.3406	0.4591	0.4849	0.462	0.2859	0.4148
6555	PC(14:0/18:1)	Phosphatidylcholine	PC Ester	53996	DMS-MS	100010144		HMDB07873	6.5952	5.8512	5.9241	7.9165	3.4988	5.2607	6.4623	4.6365	4.9095	7.3699	6.7769	6.462	5.9052	3.8137	3.6509	7.3465	3.7505	7.7983	5.9984	2.8112	2.608	1.0133	1.0901	8.1729	4.4152	3.2499	8.1086	3.2178	4.6224	3.6455	5.7601	5.687	5.5344	3.4203	2.8602	6.1676	7.1032	7.6026	9.0555	4.7407	5.1973
6556	PC(14:0/18:2)	Phosphatidylcholine	PC Ester	54152	DMS-MS	100010300		HMDB07874	7.7894	5.2518	5.8673	8.957	6.0466	7.5047	7.097	6.4461	9.6508	7.1921	7.9291	11.5793	6.962	5.3555	5.5368	8.2337	4.2338	6.6924	8.17	3.9869	3.6617	1.1908	1.6204	9.9333	7.245	3.7243	9.9004	4.4973	4.8155	3.6435	7.1695	6.9708	6.5322	5.8279	2.7363	8.7697	5.0923	7.5345	12.6703	6.278	7.1909
6557	PC(14:0/18:3)	Phosphatidylcholine	PC Ester	53294	DMS-MS	100009442		HMDB07876	0.2352	0.1728	0.1209	0.1981	0.1106	0.1705	0.2112	0.1106	0.2093	0.1968	0.3068	0.2629	0.1106	0.1567	0.1106	0.3037	0.2016	0.197	0.1106	0.1106	0.1106	0.1106	0.1106	0.2564	0.1694	0.1106	0.2663	0.1106	0.1106	0.1106	0.132	0.1902	0.1106	0.1779	0.1106	0.1106	0.1465	0.2388	0.239	0.1106	0.2105
6560	PC(14:0/20:2)	Phosphatidylcholine	PC Ester	53652	DMS-MS	100009800		HMDB07880	0.302	0.2397	0.2945	0.2912	0.197	0.2922	0.213	0.2567	0.2212	0.2969	0.1932	0.3105	0.0769	0.239	0.0769	0.2153	0.2201	0.2567	0.2608	0.1725	0.1317	0.0769	0.0769	0.6246	0.2291	0.0769	0.2724	0.234	0.1763	0.1768	0.184	0.2939	0.2981	0.177	0.1529	0.293	0.2	0.3206	0.2875	0.2018	0.2482
6561	PC(14:0/20:3)	Phosphatidylcholine	PC Ester	53823	DMS-MS	100009971		HMDB07882	1.8729	1.2242	1.4201	1.7781	1.5007	1.1818	1.1469	1.3264	1.1912	2.0486	1.6848	1.5918	1.0114	1.0223	0.7241	2.0565	0.5379	0.9643	1.4044	0.3839	0.5993	0.3614	0.1972	2.7288	1.0592	0.4955	2.643	1.0108	0.7183	0.4576	1.0047	1.9758	1.4125	1.0521	0.5315	1.2625	1.734	1.8583	1.6982	1.1072	1.6508
6562	PC(14:0/20:4)	Phosphatidylcholine	PC Ester	54338	DMS-MS	100010486		HMDB07883	5.4487	5.9336	4.7226	6.2868	3.9543	7.3521	4.7521	7.0029	7.6234	8.121	7.9251	4.0733	5.2112	4.686	3.5556	7.7919	3.1533	4.0501	6.6769	2.6451	3.0238	2.9983	1.2275	4.621	5.0673	2.7033	7.1633	7.146	3.9975	3.2854	3.5813	5.2304	4.4759	3.4857	3.4504	7.2342	5.6629	5.7986	5.2991	5.4876	6.772
6563	PC(14:0/20:5)	Phosphatidylcholine	PC Ester	54523	DMS-MS	100010671		HMDB07885	0.6296	0.283	0.3874	0.5366	0.4461	0.5993	0.283	0.5516	0.3732	0.5947	0.5235	0.283	0.4777	0.4203	0.334	1.1486	0.693	0.283	0.6732	0.283	0.7246	0.283	0.283	0.283	0.283	0.283	0.5374	0.283	0.4421	0.283	0.283	0.5506	0.283	0.3872	0.283	0.3909	0.283	0.8409	0.5089	0.283	0.5864
6566	PC(14:0/22:4)	Phosphatidylcholine	PC Ester	54153	DMS-MS	100010301		HMDB07889	0.294	0.294	0.3903	0.5946	0.294	0.4301	0.6213	0.4792	0.5788	0.5242	0.6974	0.294	0.5279	0.3572	0.313	0.2994	0.294	0.5595	0.596	0.3851	0.294	0.4354	0.294	0.677	0.3227	0.294	0.5012	0.6076	0.3007	0.294	0.472	0.3556	0.4252	0.294	0.294	0.4638	0.489	0.574	0.439	0.5664	0.6056
6567	PC(14:0/22:5)	Phosphatidylcholine	PC Ester	53998	DMS-MS	100010146		HMDB07891	0.9131	0.8247	0.6897	0.9959	0.5369	0.7398	0.7898	0.7155	0.9648	0.8676	0.9151	0.621	0.6937	0.7154	0.5293	1.0195	0.5093	0.5439	1.3538	0.4338	0.8615	0.4324	0.4324	0.6695	0.6996	0.4896	1.046	0.8246	0.6575	0.541	0.6703	0.5534	0.8209	0.5412	0.4869	1.0308	0.8492	1.1596	0.833	0.8268	0.8506
6568	PC(14:0/22:6)	Phosphatidylcholine	PC Ester	53999	DMS-MS	100010147		HMDB07892	2.1588	1.5976	1.3654	2.1695	1.1867	2.0286	1.5016	0.956	1.9721	2.3824	1.3463	0.9406	1.042	1.5135	1.1772	3.1568	1.9707	0.7287	1.9654	0.6337	1.0371	0.637	0.6337	1.9311	1.3445	0.7827	1.4955	1.0189	1.4407	0.7141	1.1967	1.296	1.4226	1.5142	0.6373	1.8102	1.0121	2.407	2.0392	1.3045	1.3399
6570	PC(15:0/16:1)	Phosphatidylcholine	PC Ester	54525	DMS-MS	100010673		HMDB07936	0.3037	0.1989	0.1989	0.1989	0.1989	0.1989	0.1989	0.2757	0.1989	0.407	0.228	0.1989	0.1989	0.2032	0.1989	0.4208	0.1989	0.1989	0.3557	0.1989	0.1989	0.1989	0.1989	0.3556	0.1989	0.1989	0.3616	0.1989	0.2925	0.1989	0.2975	0.1989	0.1989	0.1989	0.1989	0.1989	0.1989	0.3162	0.1989	0.1989	0.2954
6571	PC(15:0/18:1)	Phosphatidylcholine	PC Ester	54526	DMS-MS	100010674		HMDB07939	1.0256	1.0201	0.9267	1.1666	0.793	0.8343	1.0025	0.8123	1.1918	0.9888	1.3628	0.648	0.9569	0.7408	0.7418	1.2481	0.4437	0.6033	1.2568	0.6029	0.5253	0.3164	0.2861	0.9957	0.6927	0.8089	1.6464	1.0811	1.1808	0.6901	1.0447	0.8877	0.5978	0.6665	0.29	1.2953	1.5501	1.3326	0.7843	0.8627	1.1351
6572	PC(15:0/18:2)	Phosphatidylcholine	PC Ester	54154	DMS-MS	100010302		HMDB07940	1.3531	1.131	1.1937	1.3483	1.1297	1.1897	1.1297	1.4355	2.2818	1.4046	1.4809	1.0239	1.3153	1.0503	1.1042	1.7223	0.7154	0.774	2.0519	1.0002	0.7562	0.4687	0.5701	1.4196	1.4344	1.0475	2.5813	1.4447	1.5419	0.9911	1.5072	1.3574	0.8235	1.0626	0.3414	2.212	1.2963	1.512	1.3078	1.5402	1.6624
6574	PC(15:0/20:3)	Phosphatidylcholine	PC Ester	54339	DMS-MS	100010487		HMDB07948	0.4447	0.3893	0.3993	0.421	0.3122	0.2086	0.2086	0.4074	0.386	0.7068	0.4392	0.2086	0.2086	0.3267	0.2549	0.6156	0.2086	0.3079	0.5766	0.2086	0.2086	0.2086	0.2086	0.4817	0.3005	0.3605	0.9919	0.3984	0.3126	0.2086	0.3084	0.5338	0.3068	0.3544	0.2086	0.4996	0.4821	0.5603	0.3517	0.2978	0.3892
6575	PC(15:0/20:4)	Phosphatidylcholine	PC Ester	53295	DMS-MS	100009443		HMDB07949	0.7327	0.8937	0.6446	0.5536	0.4155	0.5194	0.4977	0.8022	0.9368	1.2324	0.8231	0.2251	0.4503	0.5756	0.4649	1.2195	0.3185	0.4306	1.0813	0.4554	0.3712	0.3711	0.2251	0.6503	0.6029	0.4655	1.3355	0.6895	0.7403	0.3541	0.4749	0.5206	0.4521	0.3802	0.2881	1.1841	0.9016	1.1147	0.5081	0.6876	0.8823
6576	PC(15:0/20:5)	Phosphatidylcholine	PC Ester	54156	DMS-MS	100010304		HMDB07951	0.1925	0.1925	0.1925	0.1925	0.1925	0.1925	0.1925	0.1925	0.1925	0.1925	0.1925	0.1925	0.1925	0.1925	0.1925	0.1925	0.1925	0.1925	0.1925	0.1925	0.1925	0.1925	0.1925	0.1925	0.1925	0.1925	0.1925	0.1925	0.1974	0.1925	0.1925	0.1925	0.1925	0.1925	0.1925	0.1925	0.1925	0.1925	0.1925	0.1925	0.1925
6578	PC(15:0/22:5)	Phosphatidylcholine	PC Ester	54000	DMS-MS	100010148		HMDB07957	0.1847	0.1847	0.1847	0.1847	0.1847	0.1847	0.1847	0.1847	0.1847	0.1847	0.1847	0.1847	0.1847	0.1847	0.1847	0.1847	0.1847	0.1847	0.1847	0.1847	0.1847	0.1847	0.1847	0.1847	0.1847	0.1847	0.1847	0.1847	0.1847	0.1847	0.1847	0.1847	0.1847	0.1847	0.1847	0.1847	0.1847	0.2156	0.1847	0.1847	0.1847
6579	PC(15:0/22:6)	Phosphatidylcholine	PC Ester	53654	DMS-MS	100009802		HMDB07958	0.4789	0.4051	0.3169	0.2187	0.2493	0.2187	0.2272	0.317	0.3653	0.396	0.2911	0.2187	0.2187	0.2187	0.2187	0.5863	0.2811	0.2187	0.4585	0.2187	0.2282	0.2187	0.2187	0.2981	0.3318	0.2187	0.4766	0.2187	0.3226	0.2187	0.2187	0.262	0.2826	0.2187	0.2187	0.3947	0.2187	0.4171	0.3349	0.268	0.2634
6580	PC(16:0/12:0)	Phosphatidylcholine	PC Ester	54527	DMS-MS	100010675			0.481	0.2734	0.2549	0.5797	0.2489	0.5727	0.7555	0.3437	0.3434	0.4837	0.4627	0.4519	0.2906	0.2105	0.3233	0.4195	0.2843	0.5938	0.296	0.2077	0.2876	0.1622	0.1199	0.3877	0.2859	0.2843	0.3511	0.2566	0.5966	0.1979	0.3058	0.3506	0.4842	0.2964	0.416	0.3374	0.3119	0.512	0.9426	0.3281	0.2823
6581	PC(16:0/14:0)	Phosphatidylcholine	PC Ester	53490	DMS-MS	100009638		HMDB07965	3.2974	2.4087	2.6239	3.3724	1.9032	3.8479	4.3795	1.7839	2.9431	4.2146	5.0759	4.1625	3.613	1.9792	1.997	4.1692	0.9564	3.9771	3.0027	0.8999	1.0728	0.386	0.4	4.1489	1.8841	1.119	3.3807	1.2329	2.8895	1.1909	2.3194	3.5718	4.3581	1.8111	1.4118	3.3671	2.3761	3.8883	4.9485	2.2679	2.4764
6582	PC(16:0/14:1)	Phosphatidylcholine	PC Ester	54340	DMS-MS	100010488		HMDB07966	0.1489	0.0877	0.155	0.0877	0.0877	0.0877	0.0877	0.0877	0.0877	0.1538	0.3233	0.0877	0.1378	0.0877	0.0877	0.1111	0.0877	0.2211	0.0877	0.0877	0.0877	0.0877	0.0877	0.2128	0.0877	0.0877	0.0877	0.0877	0.0877	0.0877	0.0877	0.1823	0.1291	0.0877	0.0877	0.0877	0.0877	0.1439	0.0877	0.0877	0.1663
6583	PC(16:0/16:0)	Phosphatidylcholine	PC Ester	53655	DMS-MS	100009803		HMDB00564	40.1268	23.2136	21.3145	42.7706	28.319	36.6245	30.9787	23.2238	37.0109	20.505	24.1016	38.3185	54.8089	19.0754	36.1621	29.3062	19.6257	38.5304	48.6791	24.2986	17.6709	12.4419	7.3577	37.9668	17.1854	31.8364	31.6931	58.3181	26.474	31.0114	23.8178	38.4273	24.0179	24.7173	9.7503	44.5217	33.5049	37.737	26.998	33.4368	31.5712
6584	PC(16:0/16:1)	Phosphatidylcholine	PC Ester	53491	DMS-MS	100009639		HMDB07969	19.5405	6.0261	7.0641	9.3859	8.229	7.5919	6.5971	6.6014	6.1008	18.1459	9.402	11.7653	13.0275	7.3649	10.4543	13.1367	3.0321	31.3225	9.593	6.2578	3.8813	3.1735	2.9416	29.1354	6.1226	3.9474	16.9947	7.9688	6.9467	7.9336	9.7469	23.6078	7.8607	9.6989	10.5613	8.8719	17.9992	15.7219	6.8646	6.91	14.8336
6585	PC(16:0/18:0)	Phosphatidylcholine	PC Ester	54157	DMS-MS	100010305		HMDB07970	40.2765	24.6868	21.2116	51.2871	23.5106	33.4828	31.3001	24.4283	34.0979	15.0737	23.4192	32.7245	49.2742	18.7396	34.7456	26.6087	23.7558	39.1617	56.9151	21.9056	18.8487	10.4992	6.4003	35.1678	16.528	31.8639	30.9866	52.219	26.1576	28.0547	21.5287	42.2964	19.596	26.1776	8.5222	41.3968	42.856	43.6834	32.4463	34.902	33.2032
6586	PC(16:0/18:1)	Phosphatidylcholine	PC Ester	53656	DMS-MS	100009804	C13875	HMDB07972	307.765	205.101	217.01	257.943	148.96	216.883	192.653	181.642	219.137	285.767	221.635	175.189	290.027	154.113	216.001	241.136	146.526	344.952	261.953	191.362	122.728	85.0747	81.2357	317.418	165.076	221.928	319.001	301.84	222.761	255.82	216.975	235.173	208.502	182.245	144.722	242.354	310.725	306.433	221.468	193.485	240.217
6587	PC(16:0/18:2)	Phosphatidylcholine	PC Ester	54341	DMS-MS	100010489		HMDB07973	652.039	373.153	434.825	489.272	433.359	459.591	412.322	427.721	639.625	487.485	467.418	505.461	688.231	392.709	580.518	441.435	346.31	557.555	606.144	462.266	327.242	181.42	219.171	697.344	467.393	514.648	649.589	640.184	446.499	514.139	489.348	462.928	440.767	505.327	251.105	657.139	450.506	552.307	559.618	463.021	495.742
6588	PC(16:0/18:3)	Phosphatidylcholine	PC Ester	53825	DMS-MS	100009973		HMDB07975	14.2697	6.7651	5.4232	6.4443	4.3134	5.0455	5.4311	5.1419	8.3728	9.3998	10.3116	9.5684	10.3262	7.2471	8.4842	12.549	5.3474	13.453	10.0204	6.6443	3.1624	1.8074	2.9013	12.4583	6.6227	4.0573	14.1703	4.5114	4.5077	10.5699	4.7746	10.3983	7.0296	7.5503	6.8938	8.7197	9.0087	11.6886	4.2478	6.4931	7.9472
6589	PC(16:0/18:4)	Phosphatidylcholine	PC Ester	54001	DMS-MS	100010149		HMDB07976	0.3196	0.2517	0.2517	0.2517	0.2517	0.2517	0.2517	0.2517	0.2517	0.2517	0.2586	0.2517	0.2517	0.2766	0.2517	0.4575	0.2517	0.2517	0.2517	0.2517	0.2517	0.2517	0.2517	0.2517	0.2517	0.2517	0.2517	0.2517	0.2517	0.2517	0.2517	0.2517	0.2517	0.2517	0.2517	0.2517	0.2517	0.254	0.2517	0.2517	0.2517
6590	PC(16:0/20:1)	Phosphatidylcholine	PC Ester	53657	DMS-MS	100009805		HMDB07978	1.1107	0.8738	1.0125	1.181	0.8543	1.0104	0.7638	0.7748	0.7769	0.9157	0.5865	0.8199	0.9024	0.6312	0.9336	0.9459	0.9967	0.8341	1.2217	0.8403	0.5103	0.4005	0.1924	1.6875	0.615	0.9077	0.9173	1.4432	1.0188	0.9484	0.9955	0.9478	0.9105	0.6323	0.4603	0.9023	0.8799	1.4548	0.8085	0.7284	0.9598
6591	PC(16:0/20:2)	Phosphatidylcholine	PC Ester	54528	DMS-MS	100010676		HMDB07979	8.5738	4.5688	5.3163	6.4986	5.1383	4.8968	3.2277	5.2112	4.4752	8.2106	4.1336	5.7728	4.472	4.6982	5.4075	5.5179	2.7039	5.9762	6.5992	3.9624	3.4846	1.7463	1.1095	16.8042	3.9212	3.9123	8.3078	6.5227	4.1927	4.6467	4.6474	6.5843	6.8378	5.2662	3.0472	5.9853	5.8354	8.4808	5.7928	3.9431	5.6232
6592	PC(16:0/20:3)	Phosphatidylcholine	PC Ester	53296	DMS-MS	100009444		HMDB07981	102.838	61.7652	64.4048	68.6829	63.7263	45.7276	35.8978	61.5433	51.8239	97.5732	58.2321	55.1292	40.8574	48.104	50.4556	82.9226	27.5867	65.5314	78.9684	38.5675	39.6852	24.4202	13.9356	148.93	40.3459	44.3026	122.768	71.4167	43.9463	52.9511	46.62	108.395	71.6634	66.2067	33.6923	63.6108	87.7235	91.5485	56.5392	53.165	74.2652
6593	PC(16:0/20:4)	Phosphatidylcholine	PC Ester	54158	DMS-MS	100010306		HMDB07982	256.639	258.757	217.703	217.283	162.921	227.531	154.147	254.69	260.049	372.828	223.013	118.423	192.233	163.035	209.656	297.13	119.543	220.549	338.055	201.269	107.556	161.386	65.7934	218.543	141.356	142.831	308.212	324.517	178.659	205.286	139.836	237.821	225.656	130.308	202.056	305.243	270.671	245.222	192.155	209.435	208.185
6594	PC(16:0/20:5)	Phosphatidylcholine	PC Ester	54159	DMS-MS	100010307		HMDB07984	39.3123	15.3048	16.9536	13.595	20.9077	16.1908	12.6801	28.0182	21.4579	31.113	20.8525	6.8849	22.2566	25.5118	18.0835	56.5732	47.4914	24.5399	45.3333	15.7162	43.9234	4.9467	3.0296	9.6869	7.8012	8.748	32.3235	10.706	32.2087	16.0735	6.5386	25.1951	12.6936	14.2877	13.9332	26.8759	40.3484	52.7144	15.1318	12.1515	15.702
6595	PC(16:0/22:1)	Phosphatidylcholine	PC Ester	54160	DMS-MS	100010308		HMDB07986	0.1313	0.1313	0.1313	0.1313	0.1313	0.1313	0.1313	0.1313	0.1313	0.1313	0.1313	0.1313	0.1313	0.1313	0.1313	0.1313	0.1313	0.1313	0.1313	0.1313	0.1313	0.1313	0.1313	0.1313	0.1313	0.1313	0.1313	0.1313	0.1313	0.1313	0.1313	0.1313	0.1313	0.1313	0.1313	0.1313	0.1313	0.1313	0.1313	0.1313	0.1313
6597	PC(16:0/22:4)	Phosphatidylcholine	PC Ester	54161	DMS-MS	100010309		HMDB07988	5.3677	6.6794	5.8583	5.3322	4.4976	4.4864	3.827	4.8729	5.186	9.5006	5.9398	4.6593	4.5894	5.6588	5.8431	4.1472	1.7646	8.1037	7.7195	4.2824	2.6404	3.135	2.0005	10.145	4.7165	3.0355	8.276	7.881	3.8562	4.4467	4.2478	7.2648	5.2099	2.7645	4.7905	7.1396	7.3448	8.7247	4.5757	5.2345	6.6437
6598	PC(16:0/22:5)	Phosphatidylcholine	PC Ester	54529	DMS-MS	100010677		HMDB07990	30.2894	30.6565	24.5683	23.1982	13.9459	18.7278	15.9306	20.8481	28.0545	28.7534	22.3815	13.6439	21.3173	20.6028	18.6727	25.8298	20.6603	19.5467	51.7062	19.9207	23.3417	11.3773	9.515	26.8778	18.0517	16.593	33.8422	26.0179	20.859	16.9845	13.6908	23.9082	20.1077	18.4994	18.97	29.2227	24.6445	41.8997	24.1926	20.2548	25.833
6599	PC(16:0/22:6)	Phosphatidylcholine	PC Ester	54003	DMS-MS	100010151		HMDB07991	141.498	84.3086	70.507	79.752	49.2787	81.1157	54.226	49.6556	88.4249	126.635	53.9776	27.353	67.5312	57.2808	74.0731	134.562	133.597	35.069	147.858	43.2549	68.9574	39.9966	25.4749	111.944	68.3943	80.4293	86.5675	64.4719	72.7161	85.0972	57.0104	72.9489	76.5557	91.4163	52.6772	89.6746	57.6165	128.176	87.4924	56.9902	57.9351
6601	PC(17:0/16:1)	Phosphatidylcholine	PC Ester	53658	DMS-MS	100009806			0.3332	0.3202	0.2852	0.3528	0.2138	0.2138	0.2138	0.2507	0.4963	0.4388	0.2545	0.2138	0.2531	0.3699	0.2725	0.4397	0.2613	0.3744	0.5541	0.2138	0.299	0.2138	0.2138	0.4591	0.3778	0.2138	0.6206	0.4228	0.3752	0.2138	0.3338	0.3065	0.3149	0.2881	0.23	0.3221	0.4745	0.5837	0.2138	0.2916	0.3781
6602	PC(17:0/18:1)	Phosphatidylcholine	PC Ester	54162	DMS-MS	100010310			1.2566	1.3704	1.5239	1.9923	0.9156	1.2097	1.1935	1.458	2.5341	1.2273	1.79	0.7758	1.5717	1.1162	1.1211	1.6073	0.9022	1.2471	2.5035	1.0589	0.9681	0.5191	0.4908	1.5685	1.2883	1.077	2.6664	2.5243	2.052	1.1178	1.356	1.2738	1.0253	0.8113	0.5481	2.0171	2.3161	2.4209	1.4594	1.4405	1.5572
6603	PC(17:0/18:2)	Phosphatidylcholine	PC Ester	54163	DMS-MS	100010311			2.9573	2.7248	3.0365	4.1355	2.4659	2.7113	2.7475	3.1739	6.1156	2.2895	3.5219	1.9889	4.1046	2.7107	2.831	2.855	2.5535	2.2988	5.2926	2.5565	2.4286	1.17	1.2301	3.111	2.9356	2.9096	5.3052	5.1308	4.2627	2.3599	3.2471	2.0172	2.3103	2.2611	1.1822	4.8774	3.6398	3.8651	3.7926	3.1333	3.6125
6604	PC(17:0/18:3)	Phosphatidylcholine	PC Ester	53297	DMS-MS	100009445			0.1442	0.1442	0.1442	0.1442	0.1442	0.1442	0.1442	0.1442	0.4136	0.1442	0.1442	0.1442	0.1442	0.1442	0.1442	0.3778	0.2389	0.2574	0.3636	0.1442	0.2652	0.1442	0.1442	0.1442	0.1442	0.1442	0.3214	0.1442	0.2399	0.1442	0.1442	0.1442	0.1442	0.1442	0.1442	0.1442	0.4554	0.3915	0.1442	0.1442	0.1442
6605	PC(17:0/20:3)	Phosphatidylcholine	PC Ester	54343	DMS-MS	100010491			0.9359	0.8639	0.8557	0.7439	0.4222	0.5124	0.4419	0.7784	1.1539	0.8337	1.0072	0.4518	0.4844	0.7618	0.5999	0.9498	0.4659	0.5055	1.1596	0.4505	0.5152	0.3327	0.2858	1.1623	0.6987	0.5663	1.7455	1.0017	0.6855	0.3508	0.6044	0.7979	0.788	0.6182	0.3129	1.0176	1.127	1.2418	0.854	0.7288	0.7963
6606	PC(17:0/20:4)	Phosphatidylcholine	PC Ester	53826	DMS-MS	100009974			1.3607	1.9244	1.8539	1.5801	1.0494	1.4424	0.8575	2.2185	3.1143	2.2654	1.9007	0.4969	1.257	1.4052	1.47	2.2456	1.0631	0.9922	3.1372	1.1663	1.0788	1.1919	0.5605	1.2125	1.1494	0.9523	2.8815	2.5369	1.7493	1.1894	0.9128	1.0751	1.5502	0.7652	1.1182	2.5039	2.3223	2.2353	1.6398	1.474	1.5087
6607	PC(17:0/20:5)	Phosphatidylcholine	PC Ester	53298	DMS-MS	100009446			0.2155	0.2111	0.2111	0.2111	0.2111	0.2111	0.2111	0.3023	0.4306	0.3141	0.2455	0.2111	0.2111	0.3511	0.2111	0.4691	0.3961	0.2111	0.5217	0.2111	0.3697	0.2111	0.2111	0.2111	0.2111	0.2111	0.3791	0.2111	0.4387	0.2111	0.2111	0.2111	0.2111	0.2111	0.2111	0.2111	0.4857	0.5487	0.2111	0.2111	0.2111
6609	PC(17:0/22:5)	Phosphatidylcholine	PC Ester	54344	DMS-MS	100010492			0.1912	0.1912	0.1912	0.1912	0.1912	0.1912	0.1912	0.1912	0.1912	0.2497	0.1912	0.1912	0.1912	0.2333	0.1912	0.1912	0.1912	0.1912	0.4363	0.1912	0.1912	0.1912	0.1912	0.1912	0.1912	0.1912	0.1995	0.1912	0.1912	0.1912	0.1912	0.1912	0.1912	0.1912	0.1912	0.1912	0.1912	0.362	0.1912	0.1912	0.1912
6610	PC(17:0/22:6)	Phosphatidylcholine	PC Ester	53659	DMS-MS	100009807			0.7099	0.5833	0.4563	0.4492	0.2747	0.32	0.254	0.3899	0.5942	0.655	0.3971	0.2454	0.2454	0.3742	0.3223	0.5678	0.5913	0.2454	0.8252	0.2454	0.3573	0.2454	0.2454	0.2454	0.457	0.3577	0.5833	0.3367	0.4497	0.3675	0.2921	0.3456	0.3301	0.3866	0.2454	0.4811	0.45	0.7104	0.5023	0.4032	0.331
6611	PC(18:0/12:0)	Phosphatidylcholine	PC Ester	53828	DMS-MS	100009976			0.4986	0.2472	0.2364	0.3588	0.1788	0.322	0.3954	0.3518	0.3701	0.5182	0.2674	0.181	0.1248	0.2798	0.3027	0.5298	0.4176	0.4433	0.5157	0.2177	0.409	0.1248	0.1248	0.3182	0.1899	0.162	0.3936	0.1248	0.522	0.2493	0.1248	0.2946	0.2875	0.2666	0.3086	0.2617	0.4742	0.5613	0.7762	0.3208	0.2748
6612	PC(18:0/14:0)	Phosphatidylcholine	PC Ester	54004	DMS-MS	100010152		HMDB08031	0.6202	0.3503	0.5564	0.6817	0.3614	0.5237	0.638	0.3666	0.5206	0.4515	0.8713	0.5598	0.5898	0.3256	0.3501	0.5796	0.241	0.6316	0.696	0.1407	0.2296	0.1396	0.1396	0.6124	0.4338	0.1396	0.5657	0.2516	0.5292	0.2456	0.4834	0.5667	0.673	0.3301	0.2493	0.4973	0.5231	0.8172	2.0496	0.4313	0.4261
6614	PC(18:0/16:1)	Phosphatidylcholine	PC Ester	53830	DMS-MS	100009978		HMDB08035	1.7341	0.7252	0.762	1.0534	0.6526	0.6371	0.8112	0.7436	0.6745	1.1709	1.2237	1.0235	1.4964	0.8732	0.9478	1.1579	0.4175	3.547	1.0646	0.6667	0.4297	0.2344	0.2602	3.4994	0.7432	0.39	1.8958	0.7163	0.8097	0.7239	0.8963	2.5547	0.9265	1.1076	1.2521	0.8207	3.0945	2.6354	0.9891	0.7045	1.5657
6615	PC(18:0/18:0)	Phosphatidylcholine	PC Ester	53660	DMS-MS	100009808		HMDB08036	2.1525	1.4705	1.3266	2.5852	1.1506	1.2329	1.1588	1.3955	1.5151	1.0333	1.4917	1.0579	1.7403	0.9252	1.244	1.7122	1.2232	1.7755	2.6187	0.9402	0.97	0.6506	0.2935	2.2404	0.9905	1.2769	1.9767	2.282	1.2168	1.3147	0.9525	2.8861	1.3302	1.6111	0.7264	1.6762	2.715	2.8409	1.6918	1.4242	1.6926
6616	PC(18:0/18:1)	Phosphatidylcholine	PC Ester	54530	DMS-MS	100010678		HMDB08038	40.9899	27.8433	34.6971	40.106	16.5294	27.958	30.8487	25.3698	31.6086	27.3145	39.2105	18.7822	40.9147	20.5535	27.6148	29.585	29.7125	42.1053	38.5993	23.5336	19.2727	8.5508	9.8656	46.0283	27.019	31.45	43.3223	37.3999	34.308	31.624	24.0769	36.1581	28.2025	29.1599	20.301	37.1501	61.7081	54.5393	35.4459	27.2192	34.5932
6617	PC(18:0/18:2)	Phosphatidylcholine	PC Ester	54345	DMS-MS	100010493		HMDB08039	234.344	133.76	176.126	201.976	122.034	152.438	160.062	160.791	208.399	125.936	194.419	145.925	231.028	148.45	199.962	156.431	170.007	195.161	241.326	157.505	128.448	61.2208	68.0342	220.617	185.056	182.815	227.738	192.03	168.739	170.077	151.795	177.018	162.963	206.214	100.542	233.452	197.738	225.556	242.704	178.64	194.439
6618	PC(18:0/18:3)	Phosphatidylcholine	PC Ester	54164	DMS-MS	100010312		HMDB08040	4.2293	1.7761	1.8239	2.3307	0.8966	1.2455	1.6344	1.4891	2.1146	2.0628	3.8205	2.1555	2.5296	2.0771	2.3875	3.7342	1.9235	4.0221	2.6468	1.4769	0.9278	0.4383	0.7155	3.148	2.0361	1.2264	3.7537	1.0148	1.3965	2.6838	1.0531	3.4462	2.0472	2.525	2.0748	2.6175	3.8366	4.4204	1.3112	2.0768	2.2573
6619	PC(18:0/18:4)	Phosphatidylcholine	PC Ester	54165	DMS-MS	100010313		HMDB08042	0.2605	0.2605	0.2605	0.2605	0.2605	0.2605	0.2605	0.2605	0.2605	0.2605	0.2605	0.2605	0.2605	0.2605	0.2605	0.2605	0.2605	0.2605	0.2605	0.2605	0.2605	0.2605	0.2605	0.2605	0.2605	0.2605	0.2605	0.2605	0.2605	0.2605	0.2605	0.2605	0.2605	0.2605	0.2605	0.2605	0.2605	0.2605	0.2605	0.2605	0.2605
6620	PC(18:0/20:0)	Phosphatidylcholine	PC Ester	54166	DMS-MS	100010314		HMDB08043	0.6121	0.4658	0.5114	0.7537	0.3098	0.6443	0.466	0.4666	0.4967	0.5214	0.4848	0.2877	0.6545	0.5182	0.5918	0.5369	0.9928	0.3077	0.8061	0.3505	0.4582	0.277	0.1535	0.5199	0.4208	0.4208	0.486	0.4947	0.576	0.6224	0.3752	0.4614	0.5344	0.5865	0.3753	0.5699	0.538	0.7179	0.5498	0.4155	0.4318
6621	PC(18:0/20:1)	Phosphatidylcholine	PC Ester	53299	DMS-MS	100009447		HMDB08044	0.2959	0.2148	0.2677	0.2134	0.1676	0.2657	0.1844	0.1862	0.1627	0.2209	0.2273	0.1088	0.2417	0.1536	0.2844	0.1849	0.2405	0.2213	0.1088	0.1818	0.1942	0.1088	0.1088	0.3427	0.187	0.2116	0.267	0.288	0.232	0.2646	0.1088	0.2587	0.2419	0.2628	0.2045	0.2139	0.3808	0.3589	0.1819	0.2848	0.2668
6622	PC(18:0/20:2)	Phosphatidylcholine	PC Ester	53300	DMS-MS	100009448		HMDB08045	2.7494	1.3736	1.7415	2.2631	1.2161	1.0087	1.0785	1.4788	1.0432	1.6985	1.4197	1.3737	1.0704	1.4057	1.3822	1.6395	0.9502	1.9754	2.1934	0.8988	1.1343	0.5381	0.3761	4.271	1.3162	0.9714	2.5116	1.7903	1.472	1.2307	1.1447	2.465	1.919	2.1609	1.0828	1.5465	2.2759	3.1255	1.8848	1.2261	1.9842
6623	PC(18:0/20:3)	Phosphatidylcholine	PC Ester	54531	DMS-MS	100010679		HMDB08047	34.1002	21.0394	23.8468	28.1544	17.6852	12.5934	12.4107	20.7232	16.5662	19.9059	21.998	14.0369	13.0869	17.8442	13.4335	28.202	11.9086	19.4395	32.2061	11.6467	15.4232	8.4158	4.2985	40.4252	14.7307	15.1875	40.6461	20.8711	15.2054	15.603	13.3176	44.6918	26.4062	28.5929	13.7206	19.4529	37.2019	35.9358	23.1163	18.8751	27.1994
6624	PC(18:0/20:4)	Phosphatidylcholine	PC Ester	54167	DMS-MS	100010315		HMDB08048	92.8628	94.8695	96.3807	102.589	51.3921	74.6345	62.5497	101.528	93.1192	93.7535	94.5267	38.8454	65.8091	68.403	67.2564	115.228	60.7153	78.2328	164.109	72.2442	47.0201	71.721	26.3147	67.7724	60.6928	61.8287	115.056	115.549	74.8086	76.0636	51.5705	108.48	92.2176	60.8206	89.6343	111.871	126.45	105.651	96.2996	89.4731	87.3639
6625	PC(18:0/20:5)	Phosphatidylcholine	PC Ester	54168	DMS-MS	100010316		HMDB08050	15.1299	7.1549	8.1475	6.8024	6.6318	6.4674	5.9526	12.2969	8.3286	8.2071	10.4067	2.292	8.727	9.3396	5.5681	25.3072	25.2235	9.8803	23.6312	6.1334	20.5433	2.0759	1.4118	3.55	3.5648	3.7045	13.0044	3.6205	11.2022	6.6661	2.5621	12.3128	5.8703	7.7695	6.9091	11.4712	19.8712	25.4873	7.899	5.666	6.7508
6628	PC(18:0/22:4)	Phosphatidylcholine	PC Ester	53831	DMS-MS	100009979		HMDB08054	1.6367	1.6019	1.6869	1.7105	1.1796	0.8536	1.2425	1.3541	1.4518	2.1048	1.6788	0.986	1.4278	1.8081	1.3358	1.2202	0.7036	2.1155	2.4488	1.0398	0.7637	0.996	0.6357	2.7593	1.338	0.8325	2.5969	1.9531	1.3486	1.3612	0.9799	2.6621	1.7588	1.2287	1.3664	1.7914	2.4255	3.5879	1.462	1.4005	2.2292
6629	PC(18:0/22:5)	Phosphatidylcholine	PC Ester	53662	DMS-MS	100009810		HMDB08056	7.5375	6.7209	5.8011	6.9478	3.3861	2.9487	3.3868	4.615	5.7073	5.0982	6.0115	2.5988	4.9778	5.3209	3.4826	5.8417	4.929	5.434	11.6582	3.3889	5.7369	2.7969	1.8518	6.7018	4.1008	3.9245	7.9757	5.0121	4.9312	3.095	2.7882	7.7838	6.1993	5.5269	5.748	6.0598	7.4986	12.8772	6.1011	5.4518	7.445
6630	PC(18:0/22:6)	Phosphatidylcholine	PC Ester	54170	DMS-MS	100010318		HMDB08057	35.1047	17.6955	17.2952	23.5186	10.7792	14.1383	13.191	10.9928	19.3362	20.2124	15.0922	6.1226	14.2105	13.8227	14.2752	31.4014	35.765	8.5239	35.6345	8.2431	18.6827	10.0394	5.451	25.299	17.4158	17.8268	21.9731	12.2644	18.0356	17.948	12.0911	23.9752	20.6545	29.3043	15.5567	18.5958	16.3155	37.7589	21.562	15.3115	16.1074
6632	PC(18:1/16:1)	Phosphatidylcholine	PC Ester	54346	DMS-MS	100010494		HMDB08101	9.5057	8.9501	8.4572	9.6304	4.0629	6.6604	6.8312	6.8194	5.6742	7.5066	6.7667	8.3707	9.832	5.5511	7.7143	6.0628	6.7131	13.9609	10.3796	7.94	4.9608	2.1759	2.9523	15.3281	6.0984	6.4198	11.4492	7.7003	7.56	8.3707	8.5746	7.1464	5.7957	5.6103	6.8273	7.3827	16.2169	10.012	8.4047	6.6858	10.3867
6633	PC(18:1/18:1)	Phosphatidylcholine	PC Ester	53832	DMS-MS	100009980		HMDB00593	13.9322	16.7972	22.013	16.0803	6.0432	13.6823	15.6479	10.727	12.0602	10.5684	14.8167	9.4682	18.3278	6.9846	13.7366	8.4417	17.0861	16.0198	15.259	13.5059	6.565	3.4826	4.9784	16.2996	8.7835	20.0919	13.4773	18.5163	17.6868	20.3551	11.2969	8.6483	12.2406	7.7242	8.139	18.0938	21.1887	14.5789	16.1362	12.0674	13.1248
6634	PC(18:1/18:2)	Phosphatidylcholine	PC Ester	53833	DMS-MS	100009981		HMDB08105	62.2639	55.4038	67.5418	59.9977	35.4123	57.5976	57.5632	53.3938	68.337	41.1689	67.2058	54.4496	91.0043	41.2587	74.1041	36.0648	60.0467	60.9245	71.209	69.6278	35.9594	14.5362	26.1089	73.9824	57.9237	72.9424	61.4758	72.9021	60.4701	72.4184	55.5777	36.9042	53.5322	45.1316	31.1699	86.4631	62.3572	64.2753	73.6098	55.2982	55.99
6635	PC(18:1/18:3)	Phosphatidylcholine	PC Ester	54347	DMS-MS	100010495		HMDB08107	1.4761	1.323	0.9537	0.8994	0.3753	0.7177	0.9594	0.6755	0.9382	0.8365	1.4604	1.0734	1.2887	0.9899	1.2927	1.1384	1.4758	1.5927	1.2038	1.3098	0.3982	0.2309	0.5033	1.4846	1.0194	0.8698	1.5586	0.7272	0.8011	2.2577	0.6726	0.7611	0.7678	0.6886	0.9471	1.0892	1.4527	1.3772	0.5903	0.8218	1.0557
6637	PC(18:1/20:1)	Phosphatidylcholine	PC Ester	53493	DMS-MS	100009641		HMDB08110	0.2646	0.1904	0.2529	0.2688	0.2108	0.3163	0.1889	0.2031	0.1329	0.2155	0.1907	0.1881	0.1921	0.1329	0.1823	0.1329	0.3152	0.1329	0.3104	0.2217	0.1329	0.1329	0.1329	0.2851	0.1329	0.2404	0.2342	0.3	0.204	0.3105	0.1329	0.1329	0.2292	0.1329	0.1329	0.2139	0.2592	0.3007	0.2471	0.1763	0.1329
6638	PC(18:1/20:2)	Phosphatidylcholine	PC Ester	54171	DMS-MS	100010319		HMDB08111	1.0982	0.8436	1.0069	0.9672	0.5405	0.9052	0.6257	0.7119	0.5161	0.8611	0.5956	0.8217	0.5987	0.7327	0.7675	0.573	0.5393	0.9627	1.0566	0.6365	0.5041	0.2604	0.22	2.4661	0.6429	0.6894	1.065	0.8399	0.7993	0.9261	0.6715	0.7871	0.7788	0.6153	0.4561	0.6877	1.2203	1.0225	0.9885	0.4844	0.7914
6639	PC(18:1/20:3)	Phosphatidylcholine	PC Ester	54532	DMS-MS	100010680		HMDB08113	7.931	7.1434	7.5141	6.8952	3.9715	4.3206	3.6587	4.9945	4.1732	5.8229	6.0329	4.5551	3.6298	3.9274	4.0292	5.3933	3.5472	5.2799	8.2363	4.5018	3.7814	1.8992	1.3671	11.7935	3.9655	4.8921	10.0491	6.1422	4.1332	5.1465	4.3509	7.0714	5.6335	4.5525	3.3107	5.0912	10.2864	7.0103	6.3684	5.1599	7.5764
6640	PC(18:1/20:4)	Phosphatidylcholine	PC Ester	54172	DMS-MS	100010320		HMDB08114	23.7921	31.1755	29.1971	25.7259	12.7253	24.9546	19.123	24.7852	23.9324	25.6618	26.8524	12.4321	20.6643	16.7228	20.5947	24.3771	17.2257	21.5173	38.1437	25.7833	10.7471	14.9518	7.6049	19.4161	16.5091	19.8869	30.6312	32.7298	20.6673	24.2689	15.3807	17.9973	23.1109	11.8502	21.0714	30.1547	33.9358	22.3241	23.2703	22.3335	23.5924
6641	PC(18:1/20:5)	Phosphatidylcholine	PC Ester	53494	DMS-MS	100009642		HMDB08116	3.6918	2.2667	2.5423	1.7669	1.7188	2.1973	1.5586	2.6112	2.2629	2.2224	2.6095	0.6554	2.1172	2.7213	2.0945	4.4324	8.0572	2.8492	4.938	2.1579	4.471	0.4862	0.4827	0.9913	0.9843	1.0361	2.871	1.1106	3.6619	1.7368	0.7295	1.9125	1.1664	1.5206	1.3808	2.7686	4.7503	4.4001	2.0158	1.3686	1.5732
6644	PC(18:1/22:4)	Phosphatidylcholine	PC Ester	53834	DMS-MS	100009982		HMDB08120	0.4791	0.7001	0.5201	0.7047	0.4493	0.6328	0.5343	0.4223	0.4436	0.5883	0.5864	0.5317	0.408	0.3869	0.4443	0.3327	0.3272	0.7212	0.8101	0.368	0.3094	0.3776	0.3094	0.9751	0.3094	0.3094	0.6014	0.563	0.3602	0.758	0.4097	0.5507	0.3094	0.3094	0.4036	0.5024	0.7249	0.6405	0.483	0.5155	0.5441
6645	PC(18:1/22:5)	Phosphatidylcholine	PC Ester	53663	DMS-MS	100009811		HMDB08122	1.1765	2.0307	1.2338	1.3825	0.5932	1.1097	0.9303	0.8097	1.4646	0.9178	1.0966	0.8573	0.9865	0.7696	0.9739	0.9897	1.6135	1.0292	2.2081	1.2028	0.9623	0.6426	0.6062	1.8138	1.1338	1.0213	1.7506	1.2477	1.0931	0.9625	0.7078	1.0059	1.1621	0.7417	1.0661	1.4931	1.8165	1.7353	1.3464	1.2567	1.5291
6646	PC(18:1/22:6)	Phosphatidylcholine	PC Ester	53496	DMS-MS	100009644		HMDB08123	6.8792	6.0405	4.7074	4.8957	2.4246	4.7128	3.4343	3.1945	4.5625	4.7014	3.3444	1.3586	3.8446	2.7243	3.799	4.9091	10.1953	1.9024	8.3379	2.7382	4.5352	2.005	1.7432	7.3342	4.3854	4.969	4.4209	2.6094	3.9086	5.5124	2.9531	2.7624	4.0414	3.9488	3.5612	5.1589	4.88	6.5621	5.9378	2.7231	3.9278
6648	PC(18:2/16:1)	Phosphatidylcholine	PC Ester	54173	DMS-MS	100010321		HMDB08134	11.5468	9.2943	9.8411	11.5298	8.1822	9.8065	9.1674	10.8589	13.1012	9.1133	11.0776	14.4278	17.9968	9.4184	12.8591	8.1012	8.4235	14.1934	16.0239	12.4294	8.4406	3.26	4.9843	18.8728	11.8971	9.6063	16.6588	12.0328	10.0439	10.7314	12.8776	9.5913	7.8402	10.6005	6.9886	13.0821	14.9728	11.5266	13.8396	9.4567	14.0713
6649	PC(18:2/18:2)	Phosphatidylcholine	PC Ester	53304	DMS-MS	100009452		HMDB08138	14.9218	12.5884	14.1252	13.9548	10.0513	14.1386	17.6933	13.5923	20.9991	7.9671	19.8469	15.3485	29.374	10.8037	21.2738	9.1611	9.9369	12.3278	15.8965	17.525	10.0296	2.5031	6.1008	19.6779	19.0329	18.7896	14.0095	14.8022	10.3087	14.5048	12.8242	8.6369	13.8805	15.4338	6.8116	24.9207	12.7898	20.9066	14.3127	13.7933	11.9508
6650	PC(18:2/18:3)	Phosphatidylcholine	PC Ester	53835	DMS-MS	100009983		HMDB08141	0.9684	1.061	0.9432	0.8115	0.597	0.9761	0.9114	0.8925	1.1422	0.8102	1.4714	1.0596	1.4376	0.9827	1.3105	1.0376	1.1557	0.9076	1.1351	1.1764	0.812	0.53	0.7419	1.0769	1.1893	1.2283	1.0042	0.9386	0.7973	1.2387	0.8155	0.7107	0.7925	0.9717	0.8567	1.0521	1.1253	1.1522	0.7763	1.0121	0.8993
6652	PC(18:2/20:1)	Phosphatidylcholine	PC Ester	53305	DMS-MS	100009453		HMDB08144	0.4054	0.355	0.3535	0.4657	0.372	0.3708	0.3198	0.348	0.3539	0.2544	0.3288	0.4937	0.4512	0.3422	0.4793	0.245	0.6225	0.3716	0.4657	0.4635	0.2064	0.1659	0.1277	0.5658	0.2769	0.475	0.3351	0.4533	0.3528	0.5972	0.3318	0.3537	0.5463	0.3047	0.2409	0.3729	0.4012	0.4773	0.4487	0.3984	0.3067
6653	PC(18:2/20:2)	Phosphatidylcholine	PC Ester	53836	DMS-MS	100009984		HMDB08145	0.5177	0.4165	0.4908	0.5466	0.3437	0.4483	0.4094	0.4051	0.3539	0.291	0.4056	0.6698	0.4154	0.4686	0.4855	0.3577	0.3339	0.5756	0.6107	0.4512	0.3227	0.162	0.113	1.3344	0.4367	0.5277	0.5508	0.4464	0.393	0.5443	0.4884	0.3522	0.5217	0.4222	0.242	0.5056	0.4489	0.5729	0.5462	0.4222	0.443
6654	PC(18:2/20:3)	Phosphatidylcholine	PC Ester	53497	DMS-MS	100009645		HMDB08146	2.7944	2.2423	2.0898	2.3363	1.5878	1.6077	1.4914	2.1534	1.8071	1.8477	2.4389	2.1927	1.9458	1.8323	2.2256	1.967	1.2002	2.0159	2.5712	1.6823	1.4538	0.7428	0.7834	4.0044	2.1581	1.7976	3.2776	1.7483	1.3502	1.8277	1.6311	1.9859	2.3692	2.303	1.2157	2.232	2.8133	2.8553	1.6538	1.8685	2.0635
6655	PC(18:2/20:4)	Phosphatidylcholine	PC Ester	54533	DMS-MS	100010681		HMDB08147	10.2585	12.2921	9.7419	9.5706	6.2764	9.7346	8.6088	10.2085	11.4212	9.1238	11.6434	6.3615	10.7835	7.0654	9.8328	9.3603	6.2168	8.9277	12.6347	9.633	5.8448	4.5736	4.0293	8.7799	8.7527	8.11	10.9217	11.5785	6.2993	8.3563	6.5519	7.1276	9.7365	7.0597	7.1376	13.6615	10.8012	10.3142	7.5811	9.1367	8.4703
6656	PC(18:2/20:5)	Phosphatidylcholine	PC Ester	53665	DMS-MS	100009813		HMDB08149	1.6146	0.8825	0.8423	0.8783	0.8712	1.0764	0.862	1.0842	1.0421	0.9954	1.1251	0.6839	1.0948	0.9353	1.2757	1.4955	1.7617	0.9926	1.9396	1.1679	2.1738	0.5109	0.6389	0.6857	0.818	0.6688	1.3153	0.8107	1.1747	0.8428	0.8303	1.0625	0.6328	1.085	0.7793	1.2408	1.7496	2.0297	0.8306	0.8194	0.9559
6659	PC(18:2/22:4)	Phosphatidylcholine	PC Ester	54535	DMS-MS	100010683		HMDB08153	0.6062	0.6245	0.4161	0.5309	0.5591	0.5625	0.6666	0.5015	0.4122	0.5516	0.5137	0.5156	0.6323	0.5146	0.3425	0.4668	0.3483	0.4177	0.7871	0.5306	0.4019	0.5307	0.4257	0.5671	0.4884	0.5076	0.4442	0.4523	0.4374	0.6151	0.6226	0.4767	0.3425	0.4388	0.4946	0.6184	0.6129	0.4991	0.3425	0.534	0.6729
6660	PC(18:2/22:5)	Phosphatidylcholine	PC Ester	53498	DMS-MS	100009646		HMDB08155	0.6717	0.7628	0.5969	0.7498	0.578	0.6341	0.7666	0.6496	0.6559	0.5963	0.639	0.5236	0.737	0.7072	0.8095	0.5705	0.9217	0.4958	0.9858	0.6585	0.7621	0.457	0.4332	0.679	0.78	0.7778	0.7119	0.6327	0.6821	0.671	0.6179	0.7162	0.7549	0.5377	0.6487	0.7961	0.6523	0.8515	0.6587	0.8316	0.6159
6661	PC(18:2/22:6)	Phosphatidylcholine	PC Ester	54349	DMS-MS	100010497		HMDB08156	1.6755	1.7193	1.2744	1.9625	1.6301	1.8921	1.6907	1.4505	1.7214	1.1659	1.9541	1.3761	1.3616	1.3029	1.842	1.7522	2.6221	1.0913	1.8065	1.1124	1.78	1.0391	1	2.0871	2.0105	1.7228	1.2856	1.4126	1.5875	1.4929	1.2633	1.1308	1.7211	1.7517	1.0402	1.7569	1.4803	2.1649	1.3345	1.356	1.225
6662	PC(20:0/14:1)	Phosphatidylcholine	PC Ester	54350	DMS-MS	100010498		HMDB08263	0.2813	0.212	0.1977	0.3031	0.2588	0.2756	0.2294	0.1968	0.2453	0.258	0.2899	0.2296	0.4041	0.1848	0.2703	0.2208	0.1711	0.3717	0.3749	0.236	0.1601	0.1173	0.1258	0.2909	0.2183	0.2187	0.2575	0.2884	0.1847	0.2401	0.2295	0.3053	0.2357	0.2017	0.1327	0.3309	0.2361	0.3519	0.2853	0.2641	0.2876
6663	PC(20:0/16:1)	Phosphatidylcholine	PC Ester	53837	DMS-MS	100009985		HMDB08266	0.1899	0.0936	0.0936	0.1326	0.0936	0.0936	0.0936	0.0936	0.0936	0.1839	0.0936	0.0936	0.165	0.0936	0.0936	0.0936	0.0936	0.2095	0.0936	0.0936	0.0936	0.0936	0.0936	0.2477	0.0936	0.0936	0.195	0.0936	0.0936	0.0936	0.1292	0.2991	0.0936	0.0936	0.112	0.0936	0.2061	0.1382	0.0936	0.0936	0.1466
6664	PC(20:0/18:1)	Phosphatidylcholine	PC Ester	53306	DMS-MS	100009454		HMDB08269	2.0025	1.4474	1.6097	2.0691	0.9033	1.7566	1.6015	1.2956	1.3789	1.9236	1.6544	1.2871	2.013	1.1229	1.5254	1.5717	1.1582	2.2674	1.8626	1.5865	0.9644	0.5689	0.5771	2.1853	1.4469	1.7167	2.307	2.0602	1.5264	1.8164	1.5527	1.7703	1.6073	1.1655	0.8966	1.6241	2.3115	2.4935	1.5645	1.233	1.617
6665	PC(20:0/18:2)	Phosphatidylcholine	PC Ester	53307	DMS-MS	100009455		HMDB08270	5.1929	3.1541	3.8091	4.1355	3.378	3.7717	3.7551	3.5397	4.7996	3.5277	4.3847	3.944	5.6331	3.195	4.4208	3.4114	3.522	4.2087	5.1793	4.1338	2.7556	1.347	1.7766	5.8651	4.6187	4.9553	5.2057	5.2748	3.7265	4.2365	3.621	3.714	3.8344	3.871	2.0179	5.2641	4.2182	5.1016	5.0658	3.4512	4.0669
6666	PC(20:0/18:3)	Phosphatidylcholine	PC Ester	54536	DMS-MS	100010684		HMDB08272	0.1366	0.1366	0.1366	0.1366	0.1366	0.1366	0.1366	0.1366	0.1366	0.1543	0.1366	0.1366	0.1366	0.1366	0.1366	0.1366	0.1366	0.1379	0.1366	0.1366	0.1366	0.1366	0.1366	0.1366	0.1366	0.1366	0.1441	0.1366	0.1366	0.1366	0.1366	0.1366	0.1366	0.1366	0.1366	0.1366	0.1366	0.1385	0.1366	0.1366	0.1366
6669	PC(20:0/20:2)	Phosphatidylcholine	PC Ester	54174	DMS-MS	100010322		HMDB08276	0.0739	0.1543	0.1937	0.0739	0.0739	0.2059	0.0739	0.0739	0.0739	0.0739	0.0739	0.0739	0.0739	0.0739	0.0739	0.0739	0.0739	0.154	0.0739	0.0739	0.0739	0.0739	0.0739	0.2195	0.0739	0.2149	0.0739	0.0739	0.0739	0.2004	0.0739	0.0739	0.1726	0.163	0.0739	0.0739	0.0739	0.1773	0.1898	0.0739	0.0739
6670	PC(20:0/20:3)	Phosphatidylcholine	PC Ester	54175	DMS-MS	100010323		HMDB08278	0.7295	0.6059	0.6136	0.5686	0.4767	0.2871	0.3351	0.479	0.4039	0.6587	0.4488	0.5505	0.3183	0.4	0.3998	0.6158	0.3778	0.6196	0.7003	0.2571	0.3828	0.2325	0.1297	1.1605	0.3579	0.4495	0.9833	0.4848	0.2633	0.3833	0.3741	0.7964	0.6364	0.5165	0.244	0.3548	0.7775	0.7449	0.4488	0.3849	0.6219
6671	PC(20:0/20:4)	Phosphatidylcholine	PC Ester	53308	DMS-MS	100009456		HMDB08279	2.2984	2.3227	2.0875	2.0502	1.4795	2.7836	1.5917	2.4077	2.437	2.6687	2.4606	0.9987	1.6742	1.6404	1.9388	2.444	1.1341	1.7504	3.5604	2.1937	1.0996	1.5223	0.7827	1.9032	1.6296	1.4097	2.6855	2.8398	1.708	1.9998	1.3948	2.167	2.1016	1.2985	1.7434	2.8678	2.6482	2.5277	2.1502	2.0056	2.4625
6672	PC(20:0/20:5)	Phosphatidylcholine	PC Ester	54176	DMS-MS	100010324		HMDB08281	0.6009	0.2441	0.2441	0.2441	0.2441	0.2441	0.2441	0.2441	0.2441	0.3427	0.5055	0.2441	0.2441	0.433	0.2441	0.6978	0.6429	0.3431	0.6174	0.2441	0.5739	0.2441	0.2441	0.2441	0.2441	0.2441	0.2441	0.2441	0.3354	0.2441	0.2441	0.2441	0.2441	0.2441	0.2441	0.2441	0.391	0.5235	0.2441	0.2441	0.2441
6675	PC(20:0/22:5)	Phosphatidylcholine	PC Ester	54178	DMS-MS	100010326		HMDB08287	0.2442	0.2442	0.2442	0.2442	0.2442	0.2442	0.2442	0.2442	0.2442	0.2442	0.2442	0.2442	0.2442	0.2442	0.2442	0.2442	0.2442	0.2442	0.5412	0.2442	0.2442	0.2442	0.2442	0.2442	0.2442	0.2442	0.3583	0.2442	0.2849	0.2442	0.2442	0.2442	0.2442	0.2442	0.2442	0.2442	0.43	0.4579	0.2442	0.2442	0.2442
6676	PC(20:0/22:6)	Phosphatidylcholine	PC Ester	54351	DMS-MS	100010499		HMDB08288	1.2566	0.7518	0.5548	0.9599	0.4422	0.8245	0.4422	0.4422	0.7865	0.9152	0.5668	0.4422	0.5839	0.4422	0.7606	1.2053	1.0858	0.4422	1.3313	0.4422	0.8668	0.4422	0.4422	1.0677	0.6199	0.6448	0.6214	0.4422	0.6374	0.8492	0.4422	0.4422	0.7794	0.6124	0.4961	0.7587	0.8459	1.3043	0.8997	0.4422	0.4422
6789	PE(14:0/18:1)	Phosphatidylethanolamine	PE Ester	54538	DMS-MS	100010686		HMDB08828	0.0974	0.0974	0.0974	0.0974	0.0974	0.0974	0.0974	0.0974	0.0974	0.0974	0.0974	0.0974	0.0974	0.0974	0.0974	0.0974	0.0974	0.0974	0.0974	0.0974	0.0974	0.0974	0.0974	0.0974	0.0974	0.0974	0.0974	0.0974	0.0974	0.0974	0.0974	0.0974	0.0974	0.0974	0.0974	0.0974	0.0974	0.0974	0.0974	0.0974	0.0974
6790	PE(14:0/18:2)	Phosphatidylethanolamine	PE Ester	54005	DMS-MS	100010153		HMDB08829	0.0647	0.0647	0.0647	0.0647	0.0647	0.0647	0.0647	0.0647	0.0647	0.0647	0.0647	0.0647	0.0647	0.0647	0.0647	0.0647	0.0647	0.0647	0.0647	0.0647	0.0647	0.0647	0.0647	0.0647	0.0647	0.0647	0.0647	0.0647	0.0647	0.0647	0.0647	0.0647	0.0647	0.0647	0.0647	0.0647	0.0647	0.0647	0.0695	0.0647	0.0647
6823	PE(16:0/14:0)	Phosphatidylethanolamine	PE Ester	53844	DMS-MS	100009992		HMDB08920	0.3425	0.3425	0.3425	0.3425	0.3425	0.3425	0.3425	0.3425	0.3425	0.3425	0.3425	0.3425	0.3425	0.3425	0.3425	0.3425	0.3425	0.3425	0.3425	0.3425	0.3425	0.3425	0.3425	0.3425	0.3425	0.3425	0.3425	0.3425	0.3425	0.3425	0.3425	0.3425	0.3425	0.3425	0.3425	0.3425	0.3425	0.3425	0.3425	0.3425	0.3425
6826	PE(16:0/16:0)	Phosphatidylethanolamine	PE Ester	54006	DMS-MS	100010154		HMDB08923	0.0298	0.0245	0.0258	0.0202	0.0202	0.0202	0.0224	0.0202	0.0247	0.0352	0.023	0.0202	0.0258	0.0233	0.0266	0.0249	0.0217	0.0316	0.026	0.0219	0.0202	0.0202	0.0202	0.055	0.0208	0.0219	0.0249	0.0202	0.0304	0.0248	0.0266	0.0249	0.0289	0.0247	0.0202	0.0202	0.0202	0.0334	0.0202	0.022	0.0301
6827	PE(16:0/16:1)	Phosphatidylethanolamine	PE Ester	53672	DMS-MS	100009820		HMDB08924	0.0967	0.0387	0.0387	0.0551	0.0387	0.0387	0.0387	0.0387	0.0387	0.2372	0.0557	0.048	0.0387	0.0387	0.0387	0.066	0.0387	0.2515	0.0387	0.0387	0.0387	0.0387	0.0387	0.2659	0.0387	0.0387	0.082	0.0387	0.0387	0.0387	0.0387	0.081	0.0387	0.0387	0.0435	0.0514	0.117	0.0726	0.0387	0.0387	0.0741
6830	PE(16:0/18:1)	Phosphatidylethanolamine	PE Ester	54007	DMS-MS	100010155	C13877	HMDB08927	1.8658	1.2437	0.7346	1.1919	0.6667	0.4625	0.9282	0.7895	1.0384	3.3388	1.03	0.3764	0.492	0.363	0.9744	1.086	0.3494	2.654	1.0934	1.0901	0.5398	0.7227	0.2158	3.3077	0.8463	1.273	1.4311	1.3108	1.1516	0.4653	0.677	0.9866	1.3182	0.9646	0.6124	1.4487	1.8048	1.1626	0.9019	0.8754	1.1261
6831	PE(16:0/18:2)	Phosphatidylethanolamine	PE Ester	53502	DMS-MS	100009650		HMDB08928	4.3927	1.5174	1.238	2.3163	2.0576	0.9553	1.8157	1.5192	3.0435	4.8089	2.0506	1.2279	0.9138	0.9076	2.7928	1.8843	0.6713	5.8393	2.3551	2.618	1.2407	1.1078	0.6069	7.4743	2.637	2.2246	2.7144	2.1142	2.1263	0.9838	2.0464	1.7521	2.2041	2.5892	1.3713	4.7286	2.9359	2.3459	2.9632	1.6889	2.5038
6832	PE(16:0/18:3)	Phosphatidylethanolamine	PE Ester	54183	DMS-MS	100010331		HMDB08930	0.2147	0.0907	0.056	0.0983	0.056	0.056	0.056	0.056	0.1421	0.2209	0.1366	0.056	0.056	0.056	0.0912	0.1181	0.056	0.2119	0.0802	0.1164	0.056	0.056	0.056	0.2461	0.113	0.0698	0.1604	0.056	0.0865	0.056	0.0782	0.0947	0.056	0.0915	0.0702	0.0772	0.1005	0.1091	0.056	0.0673	0.095
6834	PE(16:0/20:1)	Phosphatidylethanolamine	PE Ester	54185	DMS-MS	100010333		HMDB08933	0.0514	0.0514	0.0514	0.0514	0.0514	0.0514	0.0514	0.0514	0.0514	0.056	0.0514	0.0514	0.0514	0.0514	0.0514	0.0514	0.0514	0.0514	0.0514	0.0514	0.0514	0.0514	0.0514	0.0814	0.0514	0.0514	0.0514	0.0514	0.0514	0.0514	0.0514	0.0514	0.0514	0.0514	0.0514	0.0514	0.0514	0.0514	0.0514	0.0514	0.0514
6835	PE(16:0/20:2)	Phosphatidylethanolamine	PE Ester	53315	DMS-MS	100009463		HMDB08934	0.0696	0.0422	0.0422	0.0422	0.0528	0.0422	0.0422	0.0422	0.0422	0.0991	0.0438	0.0527	0.0422	0.0422	0.0422	0.0422	0.0422	0.0711	0.0422	0.0648	0.0422	0.0422	0.0422	0.263	0.0454	0.0731	0.0614	0.0709	0.0599	0.0422	0.0422	0.0422	0.0422	0.0422	0.0422	0.0422	0.0422	0.0602	0.062	0.0639	0.0786
6836	PE(16:0/20:3)	Phosphatidylethanolamine	PE Ester	54543	DMS-MS	100010691		HMDB08936	0.4455	0.2812	0.2049	0.2799	0.2809	0.1434	0.1802	0.2278	0.267	0.8798	0.2579	0.1618	0.0754	0.1331	0.2577	0.2425	0.0851	0.5539	0.3086	0.2394	0.1629	0.1322	0.0474	1.1194	0.1912	0.1881	0.3619	0.2075	0.2137	0.1259	0.2083	0.2905	0.3338	0.2711	0.156	0.2965	0.4258	0.3016	0.263	0.1966	0.2311
6837	PE(16:0/20:4)	Phosphatidylethanolamine	PE Ester	54544	DMS-MS	100010692		HMDB08937	3.6698	2.813	1.7982	2.827	1.5919	1.6518	1.8213	2.3126	3.6281	8.0248	2.2473	0.9746	0.9582	1.207	2.7725	2.7775	0.7816	5.016	3.3658	3.1135	1.0934	2.228	0.6135	5.2902	2.1707	2.3363	2.993	3.1649	2.3166	1.6878	2.07	2.1451	2.7009	2.054	2.2121	3.7843	4.1254	2.2489	2.5107	2.0286	2.5277
6838	PE(16:0/20:5)	Phosphatidylethanolamine	PE Ester	54008	DMS-MS	100010156		HMDB08939	0.4843	0.1772	0.149	0.149	0.1959	0.1613	0.149	0.149	0.3091	0.5724	0.2009	0.149	0.149	0.149	0.2421	0.4559	0.2711	0.4001	0.3332	0.1802	0.3364	0.149	0.149	0.2146	0.149	0.149	0.1968	0.149	0.6184	0.149	0.149	0.149	0.149	0.2009	0.149	0.24	0.4602	0.428	0.149	0.149	0.149
6841	PE(16:0/22:4)	Phosphatidylethanolamine	PE Ester	54358	DMS-MS	100010506		HMDB08943	0.2853	0.3288	0.1358	0.2836	0.1391	0.1588	0.1653	0.2379	0.351	0.7505	0.3347	0.1486	0.0725	0.1341	0.2383	0.1901	0.0725	0.7522	0.2648	0.3068	0.1213	0.2324	0.0725	1.0122	0.2153	0.1593	0.3828	0.3456	0.1967	0.0725	0.1947	0.2469	0.296	0.1511	0.243	0.3693	0.3113	0.3175	0.181	0.2042	0.4047
6842	PE(16:0/22:5)	Phosphatidylethanolamine	PE Ester	54359	DMS-MS	100010507		HMDB08945	1.1066	0.9852	0.4403	0.7378	0.4962	0.4545	0.4923	0.6792	1.134	2.2933	0.8948	0.3702	0.2686	0.4558	0.6954	0.8944	0.2072	1.6607	1.4547	1.0868	0.5335	0.5956	0.1734	1.6361	0.7559	0.7357	1.1668	0.825	0.7571	0.2596	0.5709	0.8365	0.6791	0.6388	0.7161	1.0504	1.1672	1.0643	0.5933	0.5912	0.8542
6843	PE(16:0/22:6)	Phosphatidylethanolamine	PE Ester	53845	DMS-MS	100009993		HMDB08946	9.7452	4.9298	2.7965	5.2053	3.2861	2.999	2.9345	3.6568	5.5701	18.2781	2.7604	1.1958	1.1077	2.7089	4.6185	8.138	2.4982	4.3524	10.0398	4.975	3.4934	3.9381	0.8748	10.4043	4.0559	6.0166	4.9919	3.4473	5.1469	2.2486	4.2952	4.1867	5.2142	6.3122	3.1258	5.0828	5.394	5.8372	3.9843	2.3184	3.4514
6851	PE(17:0/18:1)	Phosphatidylethanolamine	PE Ester	53317	DMS-MS	100009465			0.1099	0.131	0.1099	0.1099	0.1099	0.1099	0.1099	0.1099	0.1641	0.135	0.1099	0.1099	0.1099	0.1099	0.1099	0.1099	0.1099	0.1099	0.1099	0.1099	0.1099	0.1099	0.1099	0.1587	0.1099	0.1099	0.1156	0.1174	0.1257	0.1099	0.1099	0.1099	0.1099	0.1099	0.1099	0.1099	0.1381	0.1378	0.1099	0.1099	0.1159
6852	PE(17:0/18:2)	Phosphatidylethanolamine	PE Ester	54009	DMS-MS	100010157			0.1296	0.0848	0.0848	0.0848	0.0848	0.0848	0.0848	0.0848	0.2073	0.162	0.1241	0.0848	0.0848	0.0848	0.1802	0.0848	0.0848	0.1516	0.1257	0.0848	0.0848	0.0848	0.0848	0.2252	0.0952	0.1323	0.1521	0.1631	0.1058	0.0848	0.0848	0.0848	0.0848	0.0848	0.0848	0.2418	0.0848	0.1564	0.1854	0.0848	0.1392
6855	PE(17:0/20:2)	Phosphatidylethanolamine	PE Ester	54545	DMS-MS	100010693			0.0859	0.0859	0.1498	0.1736	0.1004	0.0859	0.0859	0.0859	0.2051	0.102	0.1215	0.0859	0.0859	0.0859	0.1517	0.0859	0.0859	0.0859	0.195	0.0999	0.1269	0.0859	0.0859	0.1407	0.1051	0.1297	0.121	0.0859	0.0859	0.0859	0.0859	0.0859	0.0859	0.0859	0.0859	0.1484	0.0859	0.0859	0.151	0.1341	0.1562
6857	PE(17:0/20:4)	Phosphatidylethanolamine	PE Ester	53503	DMS-MS	100009651			0.105	0.1639	0.0973	0.1929	0.0885	0.0885	0.0885	0.1717	0.2163	0.1504	0.1222	0.0885	0.0885	0.0885	0.0885	0.0885	0.0885	0.1464	0.0885	0.1404	0.0885	0.0885	0.0885	0.1854	0.0885	0.0885	0.1193	0.1305	0.1138	0.0885	0.0885	0.0885	0.0964	0.0885	0.1037	0.1443	0.1539	0.1676	0.1304	0.0885	0.1376
6861	PE(17:0/22:4)	Phosphatidylethanolamine	PE Ester	54010	DMS-MS	100010158			0.1007	0.1007	0.1007	0.1007	0.1007	0.1007	0.1007	0.1007	0.1007	0.105	0.1007	0.1007	0.1007	0.1007	0.1007	0.1007	0.1007	0.1007	0.1007	0.1007	0.1007	0.1007	0.1007	0.1007	0.1007	0.1007	0.1007	0.1007	0.1007	0.1007	0.1007	0.1007	0.1007	0.1007	0.1007	0.1007	0.1007	0.1007	0.1007	0.1007	0.1007
6862	PE(17:0/22:5)	Phosphatidylethanolamine	PE Ester	53505	DMS-MS	100009653			0.102	0.102	0.102	0.102	0.102	0.102	0.102	0.102	0.102	0.102	0.102	0.102	0.102	0.102	0.102	0.102	0.102	0.102	0.102	0.102	0.102	0.102	0.102	0.102	0.102	0.102	0.102	0.102	0.102	0.102	0.102	0.102	0.102	0.102	0.102	0.102	0.102	0.102	0.102	0.102	0.102
6863	PE(17:0/22:6)	Phosphatidylethanolamine	PE Ester	54189	DMS-MS	100010337			0.1343	0.0729	0.0729	0.1097	0.0729	0.0729	0.0729	0.1221	0.1715	0.2174	0.0729	0.0729	0.0729	0.0729	0.0729	0.1702	0.0729	0.0729	0.1631	0.0729	0.0729	0.0729	0.0729	0.0729	0.0729	0.0729	0.1309	0.0729	0.0729	0.0729	0.0729	0.0729	0.0729	0.0729	0.0729	0.1164	0.1337	0.1617	0.0729	0.0729	0.0729
6864	PE(18:0/14:0)	Phosphatidylethanolamine	PE Ester	54546	DMS-MS	100010694		HMDB08986	0.2303	0.2303	0.2303	0.2303	0.2303	0.2303	0.2303	0.2303	0.2303	0.2303	0.2303	0.2303	0.2303	0.2303	0.2303	0.2303	0.2303	0.2303	0.2303	0.2303	0.2303	0.2303	0.2303	0.2303	0.2303	0.2303	0.2303	0.2303	0.2303	0.2303	0.2303	0.2303	0.2303	0.2303	0.2303	0.2303	0.2303	0.2303	0.2303	0.2303	0.2303
6867	PE(18:0/16:0)	Phosphatidylethanolamine	PE Ester	53507	DMS-MS	100009655		HMDB08989	0.0942	0.0665	0.0466	0.0732	0.0429	0.0411	0.0448	0.0411	0.0609	0.1115	0.0475	0.0411	0.0411	0.0411	0.0632	0.0561	0.0411	0.1211	0.0774	0.049	0.0546	0.0411	0.0411	0.14	0.0521	0.064	0.0559	0.0651	0.0757	0.0411	0.0421	0.0411	0.0602	0.0516	0.0411	0.0567	0.0749	0.0756	0.0754	0.0516	0.0657
6868	PE(18:0/16:1)	Phosphatidylethanolamine	PE Ester	54191	DMS-MS	100010339		HMDB08990	0.0557	0.0258	0.0258	0.0258	0.0258	0.0258	0.0258	0.0258	0.0258	0.0473	0.0258	0.0258	0.0258	0.0258	0.0258	0.0258	0.0258	0.0835	0.0258	0.0258	0.0258	0.0258	0.0258	0.1043	0.0258	0.0258	0.0433	0.0258	0.0258	0.0258	0.0258	0.0451	0.0258	0.0258	0.0258	0.0258	0.0258	0.0258	0.0258	0.0258	0.0258
6870	PE(18:0/18:0)	Phosphatidylethanolamine	PE Ester	54547	DMS-MS	100010695		HMDB08991	0.6864	0.4455	0.4982	0.4918	0.3708	0.4987	0.2917	0.4843	0.5479	0.7516	0.377	0.2173	0.5737	0.2732	0.4579	0.7887	0.6717	0.3262	0.7565	0.2838	0.4326	0.1834	0.1198	0.4993	0.5279	0.3947	0.5047	0.4656	0.3704	0.326	0.3463	0.483	0.3639	0.6256	0.2737	0.5139	0.4253	0.6607	0.4571	0.313	0.4577
6871	PE(18:0/18:1)	Phosphatidylethanolamine	PE Ester	54548	DMS-MS	100010696		HMDB08993	6.8295	3.859	3.2862	3.6069	2.2883	2.3428	2.7073	2.7777	4.0503	5.698	3.5339	1.8788	3.4825	1.8762	3.9698	3.5822	1.9642	7.1793	4.1221	3.5266	1.9786	1.3572	1.0537	7.1404	3.1006	3.6961	4.6276	5.8764	3.8509	2.7928	2.7067	3.1834	3.0896	2.861	2.3486	5.9339	5.798	4.9522	4.3628	3.111	4.2136
6872	PE(18:0/18:2)	Phosphatidylethanolamine	PE Ester	54011	DMS-MS	100010159		HMDB08994	20.3768	7.8641	7.6879	11.1666	8.7866	6.0284	8.5241	7.9808	15.496	14.0786	10.1675	7.3926	8.3937	6.477	13.9564	10.7459	5.5803	24.4982	14.4678	12.9237	7.3755	3.858	3.6847	25.3646	12.2619	10.7486	13.9151	12.9935	10.2406	7.2552	9.8903	9.5358	9.3446	11.2022	5.7007	22.9471	13.214	12.3246	16.8389	9.6425	12.9749
6873	PE(18:0/18:3)	Phosphatidylethanolamine	PE Ester	53847	DMS-MS	100009995		HMDB08996	0.5545	0.2123	0.1387	0.2126	0.1035	0.0736	0.1422	0.1135	0.3014	0.3336	0.2981	0.1226	0.1626	0.1279	0.2657	0.3307	0.135	0.6032	0.2289	0.1986	0.117	0.0606	0.0697	0.3802	0.2447	0.1169	0.4165	0.1358	0.1228	0.2046	0.1697	0.2836	0.1625	0.1991	0.2022	0.2657	0.3438	0.2798	0.1324	0.1479	0.237
6875	PE(18:0/20:1)	Phosphatidylethanolamine	PE Ester	54363	DMS-MS	100010511		HMDB08999	0.0829	0.0594	0.027	0.0829	0.027	0.027	0.027	0.0525	0.0676	0.0775	0.0496	0.027	0.065	0.0551	0.0832	0.0552	0.0506	0.0656	0.0894	0.027	0.0476	0.027	0.027	0.1514	0.0594	0.0845	0.0702	0.0728	0.0668	0.0516	0.0418	0.0611	0.0634	0.055	0.027	0.0749	0.064	0.1021	0.0492	0.0441	0.027
6876	PE(18:0/20:2)	Phosphatidylethanolamine	PE Ester	54012	DMS-MS	100010160		HMDB09000	0.3116	0.1764	0.1866	0.1958	0.1803	0.1307	0.1051	0.1734	0.1853	0.2984	0.1467	0.1397	0.1209	0.1676	0.2006	0.2111	0.0737	0.287	0.2344	0.1392	0.1022	0.0873	0.0396	0.6563	0.1452	0.105	0.1992	0.2027	0.1809	0.1095	0.1492	0.1971	0.2381	0.1523	0.1234	0.2014	0.217	0.287	0.2553	0.1198	0.2057
6877	PE(18:0/20:3)	Phosphatidylethanolamine	PE Ester	54549	DMS-MS	100010697		HMDB09002	3.1919	1.9953	1.6487	1.9649	1.8315	1.0434	0.9737	1.6962	1.5521	3.5034	1.5843	1.1253	0.8455	1.1177	1.462	2.6053	0.6443	2.8202	2.3635	1.4617	1.1598	0.861	0.3362	4.898	1.2538	1.3885	3.1541	1.847	1.2284	1.0032	1.3647	2.7235	2.0952	1.8675	0.9834	2.1247	2.6478	2.3518	1.9129	1.3864	1.9217
6878	PE(18:0/20:4)	Phosphatidylethanolamine	PE Ester	54013	DMS-MS	100010161		HMDB09003	15.2613	13.8125	9.8222	12.2432	7.7372	7.5976	7.0363	13.1448	15.9141	22.019	9.5718	4.0332	6.099	6.7539	11.2216	14.4841	5.2494	21.5974	19.7147	15.5043	6.2202	10.5865	2.8644	16.9271	9.8807	11.281	15.1128	18.257	10.3838	7.5364	9.6961	10.7878	10.969	8.426	10.7083	17.4505	17.8257	10.9638	14.5554	10.5352	12.6383
6879	PE(18:0/20:5)	Phosphatidylethanolamine	PE Ester	54192	DMS-MS	100010340		HMDB09005	2.5029	0.8274	0.5722	0.7012	0.8619	0.6757	0.6487	1.0567	1.3079	1.7709	0.8536	0.3188	0.4953	0.9643	1.2011	2.7507	1.5491	2.0652	2.2456	0.8584	2.0195	0.2702	0.15	0.4977	0.5859	0.5896	1.3611	0.5559	2.4559	0.6361	0.3808	0.8949	0.8197	0.7967	0.8204	1.765	2.3914	2.4056	1.1903	0.6728	0.8308
6882	PE(18:0/22:4)	Phosphatidylethanolamine	PE Ester	53674	DMS-MS	100009822		HMDB09009	0.457	0.418	0.3102	0.4407	0.2975	0.2047	0.2125	0.4695	0.4942	0.901	0.5084	0.2179	0.2402	0.3457	0.3227	0.4272	0.1452	1.1728	0.6304	0.3873	0.2392	0.3364	0.1132	1.2256	0.4502	0.3041	0.7465	0.7014	0.3456	0.1923	0.3489	0.4828	0.3729	0.322	0.3467	0.5196	0.5781	0.6411	0.3253	0.3991	0.5539
6883	PE(18:0/22:5)	Phosphatidylethanolamine	PE Ester	53319	DMS-MS	100009467		HMDB09011	1.8112	1.4237	0.9776	1.1362	0.8083	0.6114	0.5112	1.1624	1.5271	2.3002	1.1736	0.5026	0.6995	0.8502	0.9185	1.588	0.4952	1.9544	2.3377	1.2355	0.8574	0.6696	0.3124	1.9156	0.8569	0.8548	2.0637	1.5125	0.9722	0.4451	0.8027	1.4741	0.9426	0.9366	0.9958	1.5548	1.4349	2.0013	1.0456	0.8753	1.3021
6884	PE(18:0/22:6)	Phosphatidylethanolamine	PE Ester	54193	DMS-MS	100010341		HMDB09012	13.0814	6.0823	3.5583	6.1867	3.9601	3.2515	2.7634	4.1827	5.3536	12.907	3.5233	1.3965	2.0011	3.1736	4.8331	12.2931	4.6177	4.6233	11.6438	3.845	3.9799	3.6724	1.1607	9.5477	4.624	5.9756	7.0693	4.3654	5.4403	3.2631	4.6847	6.2417	5.534	7.4564	3.2903	6.1014	5.7564	7.7398	5.5555	3.0759	4.4259
6885	PE(18:1/14:1)	Phosphatidylethanolamine	PE Ester	53320	DMS-MS	100009468		HMDB09053	0.036	0.036	0.036	0.036	0.036	0.036	0.036	0.036	0.036	0.036	0.0465	0.036	0.036	0.036	0.036	0.036	0.036	0.036	0.036	0.036	0.036	0.036	0.036	0.036	0.0508	0.036	0.036	0.036	0.036	0.036	0.036	0.036	0.036	0.036	0.036	0.036	0.036	0.036	0.036	0.036	0.036
6886	PE(18:1/16:1)	Phosphatidylethanolamine	PE Ester	54550	DMS-MS	100010698		HMDB09056	0.1003	0.1018	0.0983	0.1457	0.0579	0.0761	0.073	0.0896	0.2297	0.1544	0.1561	0.079	0.218	0.0471	0.1011	0.0734	0.0928	0.174	0.1535	0.0503	0.0734	0.0478	0.0326	0.1601	0.1146	0.1015	0.1829	0.2454	0.104	0.0607	0.0868	0.0766	0.06	0.0905	0.0701	0.1285	0.1461	0.1214	0.1204	0.0734	0.165
6887	PE(18:1/18:1)	Phosphatidylethanolamine	PE Ester	53321	DMS-MS	100009469		HMDB09059	1.3095	1.5982	0.7202	0.4977	0.4919	0.2572	0.6693	0.6435	0.9294	1.3095	0.618	0.2118	0.5493	0.1664	1.305	0.3365	0.3847	1.5498	0.6812	1.0512	0.2972	0.2313	0.1719	2.0941	0.5956	0.9009	0.4555	1.161	0.9625	0.3776	0.3763	0.3845	0.5799	0.4172	0.3974	4.5661	1.3427	1.0016	1.3399	0.7205	0.7389
6888	PE(18:1/18:2)	Phosphatidylethanolamine	PE Ester	54551	DMS-MS	100010699		HMDB09060	3.0258	2.0038	1.4893	1.8199	1.6074	0.8092	1.9052	1.7411	3.735	2.7427	2.0091	1.1014	1.5963	0.7538	3.4267	1.067	0.8863	4.7561	2.0691	3.2104	1.0413	0.555	0.4862	6.7864	2.5329	1.8859	1.6327	2.4709	2.1683	0.9951	1.5897	0.9681	1.3795	1.4595	1.0344	9.5514	2.9453	2.1436	3.7952	1.7561	1.9818
6889	PE(18:1/18:3)	Phosphatidylethanolamine	PE Ester	54194	DMS-MS	100010342		HMDB09062	0.1056	0.1027	0.0447	0.0447	0.0447	0.0447	0.0447	0.0527	0.1577	0.1548	0.0447	0.0447	0.0447	0.0447	0.0999	0.0447	0.0771	0.1272	0.0835	0.098	0.0447	0.0447	0.0447	0.1373	0.0868	0.0447	0.0823	0.0447	0.0724	0.0447	0.0447	0.0447	0.0447	0.0447	0.0651	0.2801	0.1042	0.0634	0.0447	0.0447	0.0447
6891	PE(18:1/20:1)	Phosphatidylethanolamine	PE Ester	53322	DMS-MS	100009470		HMDB09065	0.0477	0.0477	0.0477	0.0477	0.0477	0.0477	0.0477	0.0477	0.0477	0.0477	0.0477	0.0477	0.0477	0.0477	0.0719	0.0477	0.0477	0.0477	0.0477	0.0477	0.0477	0.0477	0.0477	0.092	0.0477	0.0477	0.0477	0.0477	0.0477	0.0477	0.0477	0.0477	0.0477	0.0477	0.0477	0.0507	0.0477	0.0477	0.0477	0.0477	0.0477
6892	PE(18:1/20:2)	Phosphatidylethanolamine	PE Ester	54552	DMS-MS	100010700		HMDB09066	0.0425	0.0425	0.0425	0.0425	0.0425	0.0425	0.0425	0.0425	0.0425	0.0574	0.0425	0.0425	0.0425	0.0425	0.0425	0.0425	0.0425	0.0662	0.0425	0.0425	0.0425	0.0425	0.0425	0.204	0.0425	0.0425	0.0425	0.0425	0.0526	0.0425	0.0425	0.0425	0.0425	0.0425	0.0425	0.0425	0.0425	0.0612	0.0425	0.0425	0.0425
6893	PE(18:1/20:3)	Phosphatidylethanolamine	PE Ester	54195	DMS-MS	100010343		HMDB09068	0.3266	0.3001	0.1522	0.2487	0.1477	0.0959	0.1317	0.1832	0.217	0.387	0.2157	0.1401	0.1219	0.0926	0.2283	0.1924	0.0674	0.3811	0.2667	0.2382	0.109	0.0723	0.0405	0.7598	0.2095	0.1965	0.2744	0.1898	0.1537	0.0997	0.1914	0.1754	0.1886	0.1768	0.1017	0.2733	0.4469	0.1979	0.2266	0.1672	0.2068
6894	PE(18:1/20:4)	Phosphatidylethanolamine	PE Ester	54364	DMS-MS	100010512		HMDB09069	1.8349	2.7281	1.7212	2.1308	1.0239	1.4447	1.4019	2.3938	2.732	3.5333	1.7602	0.6933	1.6736	0.8138	2.4076	1.6221	1.106	3.2335	3.0188	3.244	0.8166	1.4154	0.409	3.1018	2.0865	1.8839	2.0498	2.6767	1.9561	1.1946	1.5299	1.1611	1.2784	1.15	1.4264	3.2472	3.3349	1.5732	2.1831	1.7331	2.0257
6895	PE(18:1/20:5)	Phosphatidylethanolamine	PE Ester	53675	DMS-MS	100009823		HMDB09071	0.3514	0.1204	0.1408	0.1866	0.1623	0.2398	0.1204	0.2667	0.1204	0.308	0.1733	0.1204	0.1976	0.2517	0.3476	0.3728	0.3737	0.4041	0.5909	0.2346	0.3312	0.1204	0.1204	0.1204	0.1204	0.1204	0.1832	0.1204	0.5903	0.1204	0.1204	0.1204	0.1204	0.1255	0.1444	0.3947	0.5443	0.3106	0.2772	0.1204	0.2192
6896	PE(18:1/22:0)	Phosphatidylethanolamine	PE Ester	55177	DMS-MS	100013437			0.123	0.1323	0.084	0.1158	0.0677	0.0879	0.1626	0.1935	0.1149	0.0775	0.0677	0.1503	0.109	0.0801	0.0925	0.1138	0.1443	0.1528	0.0825	0.1074	0.095	0.0405	0.0787	0.1696	0.079	0.1925	0.0811	0.0913	0.083	0.1146	0.098	0.0754	0.1123	0.1174	0.2482	0.1981	0.0644	0.0817	0.1624	0.0945	0.0687
6899	PE(18:1/22:4)	Phosphatidylethanolamine	PE Ester	53323	DMS-MS	100009471		HMDB09075	0.0697	0.0871	0.0697	0.0882	0.0697	0.0697	0.0697	0.0878	0.1155	0.1363	0.1271	0.0697	0.0697	0.0861	0.0869	0.0697	0.0697	0.2108	0.1191	0.1233	0.0697	0.08	0.0697	0.1937	0.0783	0.0697	0.0769	0.1617	0.0697	0.0697	0.0989	0.0697	0.0697	0.0697	0.0802	0.1507	0.1208	0.0977	0.0697	0.0697	0.1277
6900	PE(18:1/22:5)	Phosphatidylethanolamine	PE Ester	53324	DMS-MS	100009472		HMDB09077	0.2184	0.2966	0.1437	0.1382	0.1754	0.0613	0.1257	0.1724	0.2069	0.3949	0.1633	0.1428	0.1921	0.1503	0.3299	0.2113	0.1151	0.3075	0.3453	0.3223	0.1202	0.1377	0.0613	0.4156	0.19	0.1595	0.24	0.24	0.1973	0.1091	0.1438	0.1578	0.1314	0.157	0.1497	0.2741	0.3135	0.1967	0.1564	0.117	0.2479
6901	PE(18:1/22:6)	Phosphatidylethanolamine	PE Ester	53509	DMS-MS	100009657		HMDB09078	1.7076	1.3501	0.7299	1.0724	0.714	0.6629	0.5238	0.8394	1.0295	2.6633	0.6093	0.2531	0.6374	0.567	1.5341	1.3727	1.0898	0.7017	2.067	1.115	0.6136	0.5118	0.2067	2.4823	1.0777	0.9833	0.969	0.6756	1.1045	0.5142	0.8377	0.7442	0.838	1.0889	0.5082	1.4076	1.1135	1.1649	1.0255	0.5288	0.7694
6902	PE(18:2/14:1)	Phosphatidylethanolamine	PE Ester	54016	DMS-MS	100010164		HMDB09086	0.0525	0.0525	0.0525	0.0525	0.0525	0.0525	0.0525	0.0525	0.0706	0.0525	0.0525	0.0525	0.0525	0.0525	0.0525	0.0525	0.0525	0.0525	0.0525	0.0525	0.0525	0.0525	0.0525	0.0525	0.0525	0.0525	0.0525	0.0525	0.0525	0.0525	0.0525	0.0525	0.0525	0.0525	0.0525	0.0525	0.0832	0.0525	0.0525	0.0525	0.0575
6903	PE(18:2/16:1)	Phosphatidylethanolamine	PE Ester	53510	DMS-MS	100009658		HMDB09089	0.3477	0.1601	0.1829	0.3884	0.1829	0.3161	0.2296	0.2057	0.8141	0.2114	0.549	0.2016	0.5272	0.1665	0.4808	0.1715	0.2826	0.3854	0.4618	0.1829	0.2609	0.0724	0.0708	0.3906	0.2927	0.2115	0.5002	0.6858	0.2776	0.182	0.2277	0.1608	0.1786	0.3154	0.1424	0.6143	0.4636	0.2341	0.3785	0.1651	0.5033
6904	PE(18:2/18:2)	Phosphatidylethanolamine	PE Ester	53325	DMS-MS	100009473		HMDB09093	0.1897	0.1046	0.1002	0.0877	0.1784	0.0688	0.1685	0.1371	0.3421	0.1631	0.1012	0.0652	0.1456	0.0439	0.2856	0.0673	0.0796	0.3257	0.1359	0.2539	0.0911	0.0447	0.0496	0.4911	0.1742	0.1627	0.1299	0.1881	0.0999	0.0949	0.0792	0.0782	0.0893	0.1589	0.0773	1.0107	0.1873	0.1812	0.3717	0.1293	0.1381
6905	PE(18:2/18:3)	Phosphatidylethanolamine	PE Ester	54554	DMS-MS	100010702		HMDB09095	0.0377	0.0377	0.0377	0.0377	0.0377	0.0377	0.0377	0.0377	0.0888	0.0377	0.0377	0.0377	0.0377	0.0377	0.0377	0.0377	0.0377	0.0377	0.0377	0.0377	0.0377	0.0377	0.0377	0.0377	0.0377	0.0377	0.0377	0.0377	0.0377	0.0377	0.0377	0.0377	0.0377	0.0377	0.0377	0.0377	0.0377	0.0377	0.0377	0.0377	0.0377
6907	PE(18:2/20:1)	Phosphatidylethanolamine	PE Ester	54196	DMS-MS	100010344		HMDB09098	0.043	0.043	0.043	0.043	0.043	0.043	0.043	0.043	0.043	0.043	0.043	0.043	0.043	0.043	0.043	0.043	0.043	0.043	0.043	0.043	0.043	0.043	0.043	0.0798	0.043	0.043	0.043	0.043	0.043	0.043	0.043	0.043	0.043	0.043	0.043	0.043	0.043	0.043	0.043	0.043	0.043
6908	PE(18:2/20:2)	Phosphatidylethanolamine	PE Ester	54197	DMS-MS	100010345		HMDB09099	0.1042	0.1042	0.1042	0.1042	0.1042	0.1042	0.1042	0.1042	0.1042	0.1042	0.1042	0.1042	0.1042	0.1042	0.1042	0.1042	0.1042	0.1042	0.1042	0.1042	0.1042	0.1042	0.1042	0.1042	0.1042	0.1042	0.1042	0.1042	0.1042	0.1042	0.1042	0.1042	0.1042	0.1042	0.1042	0.1042	0.1042	0.1042	0.1042	0.1042	0.1042
6909	PE(18:2/20:3)	Phosphatidylethanolamine	PE Ester	54017	DMS-MS	100010165		HMDB09101	0.0413	0.0413	0.0413	0.0413	0.0413	0.0413	0.0413	0.0413	0.0413	0.0413	0.0413	0.0413	0.0413	0.0413	0.0413	0.0413	0.0413	0.0413	0.0413	0.0413	0.0413	0.0413	0.0413	0.1217	0.0413	0.0413	0.0413	0.0413	0.0413	0.0413	0.0413	0.0413	0.0413	0.0413	0.0413	0.0662	0.083	0.0413	0.0413	0.0413	0.0413
6910	PE(18:2/20:4)	Phosphatidylethanolamine	PE Ester	54555	DMS-MS	100010703		HMDB09102	0.2515	0.1742	0.1743	0.2016	0.1505	0.1906	0.1929	0.1821	0.3695	0.259	0.223	0.0833	0.1841	0.1097	0.2705	0.1715	0.1459	0.2849	0.2689	0.1993	0.114	0.1115	0.0833	0.3383	0.229	0.1692	0.1966	0.3647	0.1593	0.0833	0.1173	0.0833	0.1019	0.1663	0.1421	0.3771	0.336	0.2239	0.2085	0.1786	0.2555
6916	PE(18:2/22:6)	Phosphatidylethanolamine	PE Ester	53677	DMS-MS	100009825		HMDB09111	0.167	0.167	0.167	0.167	0.167	0.167	0.167	0.167	0.167	0.167	0.167	0.167	0.167	0.167	0.167	0.167	0.234	0.167	0.167	0.167	0.167	0.167	0.167	0.167	0.167	0.167	0.167	0.167	0.167	0.167	0.167	0.167	0.167	0.167	0.167	0.1911	0.167	0.1783	0.167	0.167	0.167
6919	PE(O-16:0/16:0)	Phosphatidylethanolamine	PE Ether	53849	DMS-MS	100009997		HMDB11158	0.0516	0.0516	0.0516	0.0516	0.0516	0.0516	0.0516	0.0516	0.0516	0.0516	0.0516	0.0516	0.0516	0.0516	0.0516	0.0516	0.0516	0.0516	0.0516	0.0516	0.0516	0.0516	0.0516	0.0516	0.0516	0.0516	0.0516	0.0516	0.0516	0.0516	0.0516	0.0516	0.0516	0.0516	0.0516	0.0516	0.0516	0.0516	0.0516	0.0516	0.0516
6922	PE(O-16:0/18:1)	Phosphatidylethanolamine	PE Ether	54366	DMS-MS	100010514		HMDB11157	0.0982	0.0938	0.1233	0.0896	0.0857	0.0964	0.1044	0.1614	0.1969	0.1912	0.1444	0.0933	0.1707	0.0585	0.1397	0.104	0.1097	0.0977	0.1016	0.0909	0.0522	0.0391	0.0381	0.1031	0.1282	0.1083	0.1217	0.2603	0.1229	0.07	0.098	0.0919	0.0623	0.0902	0.0522	0.1371	0.1561	0.1218	0.0932	0.0911	0.1787
6923	PE(O-16:0/18:2)	Phosphatidylethanolamine	PE Ether	53850	DMS-MS	100009998			0.2092	0.1588	0.2202	0.2099	0.1279	0.333	0.155	0.3079	0.4683	0.2839	0.3725	0.1568	0.3251	0.1179	0.4027	0.1778	0.1592	0.1758	0.2096	0.1679	0.1612	0.0664	0.0659	0.2277	0.3447	0.1435	0.3053	0.4297	0.289	0.0888	0.1479	0.1079	0.1464	0.3262	0.0939	0.3971	0.437	0.2671	0.2388	0.13	0.4142
6928	PE(O-16:0/20:3)	Phosphatidylethanolamine	PE Ether	54200	DMS-MS	100010348			0.0688	0.0481	0.1162	0.0785	0.0865	0.1478	0.0307	0.1114	0.1184	0.0828	0.133	0.0386	0.1187	0.0578	0.1005	0.0854	0.0307	0.061	0.0307	0.0307	0.0307	0.0307	0.0307	0.0307	0.0913	0.0307	0.0792	0.2105	0.092	0.0307	0.0666	0.057	0.0307	0.0786	0.0553	0.1031	0.1644	0.077	0.083	0.0613	0.1398
6929	PE(O-16:0/20:4)	Phosphatidylethanolamine	PE Ether	53329	DMS-MS	100009477			0.9743	1.019	1.488	1.008	0.5583	1.9341	0.5473	2.0515	1.5819	1.3581	1.2222	0.2595	1.389	0.5779	1.5017	1.131	0.7795	0.4673	1.0959	0.396	0.5398	0.5594	0.1599	0.6375	1.8282	0.4005	1.0023	2.0145	0.9958	0.3235	0.5424	0.5127	0.3345	1.122	0.6521	1.7014	1.287	0.6411	0.6368	0.5204	1.4243
6930	PE(O-16:0/20:5)	Phosphatidylethanolamine	PE Ether	53330	DMS-MS	100009478			0.2238	0.13	0.1362	0.13	0.1947	0.2454	0.13	0.2775	0.1902	0.2864	0.13	0.13	0.1804	0.1522	0.13	0.2713	0.3483	0.13	0.13	0.13	0.3312	0.13	0.13	0.13	0.1412	0.13	0.1865	0.13	0.2003	0.13	0.13	0.13	0.13	0.1772	0.13	0.2867	0.2521	0.337	0.1958	0.13	0.13
6933	PE(O-16:0/22:4)	Phosphatidylethanolamine	PE Ether	53852	DMS-MS	100010000			0.1556	0.1597	0.2656	0.2227	0.1288	0.2424	0.1842	0.2589	0.358	0.24	0.3791	0.1486	0.2402	0.1361	0.273	0.1788	0.0663	0.1827	0.2009	0.1489	0.0717	0.1289	0.0663	0.1717	0.321	0.1346	0.2245	0.6481	0.185	0.1667	0.161	0.1985	0.1326	0.216	0.1222	0.228	0.3656	0.1928	0.1644	0.1439	0.4386
6934	PE(O-16:0/22:5)	Phosphatidylethanolamine	PE Ether	53331	DMS-MS	100009479			0.6203	0.4428	0.6045	0.4837	0.3214	0.5177	0.4064	0.7722	1.0166	0.608	0.9251	0.3029	0.8165	0.3524	0.5815	0.7201	0.3004	0.4643	0.7358	0.3698	0.4312	0.2017	0.1424	0.4801	0.6748	0.1929	0.7626	1.28	0.4674	0.1669	0.3013	0.4301	0.2264	0.5831	0.2811	0.8311	0.6005	0.6671	0.3829	0.3886	0.9167
6935	PE(O-16:0/22:6)	Phosphatidylethanolamine	PE Ether	53332	DMS-MS	100009480			1.8447	0.8844	1.2728	1.0218	0.8692	1.6047	0.9194	1.3653	1.4572	1.431	0.9855	0.3583	1.1913	0.7009	1.1587	1.6063	1.4223	0.4752	1.5771	0.605	0.8328	0.3868	0.2598	1.2318	1.5664	0.8955	1.0444	1.1491	1.126	0.4955	0.9551	0.941	0.6032	1.5951	0.4025	1.3974	0.8456	1.4582	0.9596	0.6101	0.8832
6937	PE(O-18:0/16:0)	Phosphatidylethanolamine	PE Ether	53333	DMS-MS	100009481			0.0836	0.0437	0.0686	0.0704	0.0584	0.0278	0.0584	0.0641	0.0926	0.0677	0.0838	0.0494	0.0717	0.064	0.0764	0.0552	0.0702	0.0573	0.0936	0.0548	0.0409	0.0278	0.0278	0.0754	0.0564	0.0487	0.0711	0.1069	0.0519	0.0731	0.0569	0.0789	0.0575	0.0759	0.0278	0.0868	0.0583	0.0549	0.0637	0.0576	0.0802
6939	PE(O-18:0/18:0)	Phosphatidylethanolamine	PE Ether	53853	DMS-MS	100010001			0.0367	0.0367	0.0367	0.0367	0.0367	0.0367	0.0367	0.0367	0.0484	0.0367	0.0367	0.0367	0.0367	0.0367	0.0367	0.0548	0.0367	0.0367	0.0367	0.0367	0.0367	0.0367	0.0367	0.0367	0.0367	0.0367	0.0367	0.0367	0.0367	0.0367	0.0367	0.0367	0.0367	0.0367	0.0367	0.0367	0.0367	0.0575	0.0367	0.0367	0.0367
6940	PE(O-18:0/18:1)	Phosphatidylethanolamine	PE Ether	53513	DMS-MS	100009661			0.2722	0.225	0.253	0.3136	0.12	0.1578	0.1972	0.2532	0.3985	0.3968	0.2909	0.146	0.3371	0.1249	0.2508	0.1978	0.1725	0.2374	0.307	0.2136	0.1264	0.1002	0.0547	0.3175	0.2699	0.2339	0.3443	0.3985	0.2648	0.1593	0.1826	0.1934	0.1616	0.183	0.0932	0.3844	0.4022	0.2541	0.2141	0.1787	0.2807
6941	PE(O-18:0/18:2)	Phosphatidylethanolamine	PE Ether	54368	DMS-MS	100010516			0.6232	0.3945	0.4964	0.6453	0.3402	0.4833	0.4994	0.5808	1.1599	0.5413	0.719	0.3478	0.8523	0.2937	0.8069	0.4301	0.3197	0.6358	0.6234	0.4586	0.3163	0.1637	0.1509	0.8018	0.8068	0.4378	0.681	0.8123	0.5373	0.3078	0.4566	0.3027	0.3002	0.6692	0.204	1.1743	0.8741	0.484	0.6698	0.3755	0.7982
6942	PE(O-18:0/18:3)	Phosphatidylethanolamine	PE Ether	54369	DMS-MS	100010517			0.0449	0.0449	0.0449	0.0449	0.0449	0.0449	0.0449	0.0449	0.0449	0.0449	0.0449	0.0449	0.0449	0.0449	0.0449	0.0449	0.0449	0.0449	0.0449	0.0449	0.0449	0.0449	0.0449	0.0449	0.0449	0.0449	0.0449	0.0449	0.0449	0.0449	0.0449	0.0449	0.0449	0.0449	0.0449	0.0449	0.0449	0.0449	0.0449	0.0449	0.0449
6946	PE(O-18:0/20:3)	Phosphatidylethanolamine	PE Ether	53335	DMS-MS	100009483			0.1202	0.123	0.1653	0.1658	0.1318	0.1494	0.0995	0.1707	0.1828	0.2091	0.1443	0.0877	0.1767	0.0528	0.1577	0.1207	0.0785	0.1156	0.2063	0.0574	0.0839	0.0604	0.0341	0.1386	0.1558	0.0582	0.1593	0.2796	0.1208	0.0634	0.1237	0.0916	0.1159	0.1414	0.088	0.2179	0.3232	0.1153	0.1151	0.1005	0.1733
6947	PE(O-18:0/20:4)	Phosphatidylethanolamine	PE Ether	54203	DMS-MS	100010351			1.7143	2.027	2.3902	1.9456	0.8732	2.4659	1.3503	2.7338	3.1315	2.8057	2.2071	0.7646	2.9973	0.9766	2.3282	1.7971	1.1953	1.3998	2.3942	0.9726	0.8739	1.0148	0.3907	1.2855	2.6796	0.7615	2.0725	3.0947	1.2891	1.0543	1.4742	0.8553	1.0708	2.104	1.2673	4.8982	2.4901	1.2456	1.3309	1.3274	2.3423
6948	PE(O-18:0/20:5)	Phosphatidylethanolamine	PE Ether	54204	DMS-MS	100010352			0.36	0.2532	0.2761	0.2057	0.2437	0.3671	0.1477	0.5418	0.4967	0.3749	0.2611	0.1477	0.3783	0.1897	0.3123	0.5196	0.78	0.2576	0.6011	0.1477	0.5342	0.1477	0.1477	0.1477	0.2786	0.1477	0.2952	0.2528	0.3107	0.1477	0.1743	0.1477	0.1477	0.3383	0.1477	0.81	0.6814	0.3796	0.2659	0.1972	0.2815
6951	PE(O-18:0/22:4)	Phosphatidylethanolamine	PE Ether	54019	DMS-MS	100010167			0.1119	0.1558	0.2198	0.1758	0.1	0.1929	0.1346	0.2243	0.2601	0.1981	0.269	0.1352	0.1874	0.128	0.2038	0.1684	0.0871	0.2179	0.2143	0.1813	0.0754	0.1587	0.0754	0.1397	0.2016	0.1761	0.196	0.3619	0.175	0.1216	0.161	0.1655	0.0961	0.1425	0.0838	0.2908	0.2668	0.1542	0.1833	0.1874	0.251
6952	PE(O-18:0/22:5)	Phosphatidylethanolamine	PE Ether	54370	DMS-MS	100010518			0.4863	0.3453	0.4179	0.4045	0.2782	0.2955	0.3289	0.4185	0.7861	0.3741	0.6117	0.1841	0.5372	0.2425	0.3584	0.4525	0.261	0.3075	0.7302	0.3574	0.271	0.1907	0.0942	0.3201	0.5165	0.183	0.6	0.7025	0.3306	0.1545	0.276	0.2918	0.2027	0.4468	0.2288	0.7654	0.5884	0.5148	0.3175	0.3844	0.5771
6953	PE(O-18:0/22:6)	Phosphatidylethanolamine	PE Ether	54371	DMS-MS	100010519			1.7551	0.9831	1.2819	1.3051	0.6652	1.3574	0.898	1.2929	1.9007	1.6093	0.9908	0.4102	1.557	0.6024	1.3947	1.5735	1.4269	0.5019	2.5368	0.655	0.8766	0.4766	0.2974	1.163	1.4954	0.8428	1.1311	1.0336	0.9966	0.6405	1.1685	0.6818	0.6963	1.6589	0.5347	2.114	1.4286	1.359	0.922	0.7321	0.9644
6958	PE(P-16:0/16:0)	Phosphatidylethanolamine	PE Plasmalogen	54373	DMS-MS	100010521			0.0509	0.0519	0.0677	0.0667	0.0402	0.0333	0.0333	0.0719	0.0914	0.0773	0.068	0.0466	0.0968	0.0333	0.0333	0.0648	0.0779	0.0333	0.0671	0.0394	0.0434	0.0333	0.0333	0.0526	0.0625	0.0563	0.073	0.0333	0.0333	0.0501	0.0333	0.0806	0.0497	0.0588	0.0333	0.0743	0.0333	0.0728	0.0333	0.0541	0.0974
6959	PE(P-16:0/16:1)	Phosphatidylethanolamine	PE Plasmalogen	54374	DMS-MS	100010522		HMDB11339	0.0424	0.0424	0.0424	0.0424	0.0424	0.0424	0.0424	0.0424	0.0424	0.0424	0.0424	0.0424	0.0424	0.0424	0.0424	0.0424	0.0424	0.0424	0.0424	0.0424	0.0424	0.0424	0.0424	0.0424	0.0424	0.0424	0.0424	0.0424	0.0424	0.0424	0.0424	0.0424	0.0424	0.0424	0.0424	0.0424	0.0791	0.0424	0.0424	0.0424	0.0424
6960	PE(P-16:0/18:0)	Phosphatidylethanolamine	PE Plasmalogen	54375	DMS-MS	100010523		HMDB11340	0.0333	0.0333	0.0333	0.0333	0.0333	0.0333	0.0333	0.0428	0.0333	0.0464	0.0333	0.0333	0.0333	0.0333	0.0483	0.0333	0.0333	0.0333	0.0333	0.0333	0.0333	0.0333	0.0333	0.0333	0.0333	0.0536	0.0413	0.0525	0.0333	0.0333	0.0333	0.0333	0.0333	0.0357	0.0333	0.039	0.0617	0.0333	0.0333	0.0333	0.0444
6961	PE(P-16:0/18:1)	Phosphatidylethanolamine	PE Plasmalogen	53336	DMS-MS	100009484		HMDB11342	0.6446	0.8288	0.9433	0.9733	0.4716	0.9431	0.6734	1.1887	1.4216	1.4081	0.858	0.6771	1.6495	0.3805	0.9195	0.8688	0.7423	0.5513	0.839	0.5927	0.5289	0.2538	0.1992	0.7665	0.7848	0.9575	1.1571	1.6999	0.7828	0.5306	0.6614	0.7835	0.5186	0.7901	0.3015	1.0878	1.5588	0.8223	0.6828	0.5646	1.3679
6962	PE(P-16:0/18:2)	Phosphatidylethanolamine	PE Plasmalogen	54561	DMS-MS	100010709		HMDB11343	2.0247	2.0769	2.6103	2.8222	1.5294	2.7817	1.8232	3.7753	4.4062	2.6811	3.4679	1.7444	4.7499	1.2522	4.1173	2.2236	2.0458	2.0116	2.6161	1.4551	1.9743	0.4719	0.5423	2.3359	3.1172	2.2275	3.7245	3.9723	2.1072	1.1666	1.9548	1.7578	1.5289	3.2692	0.8171	4.0386	5.7626	1.776	2.1732	1.5194	4.7027
6963	PE(P-16:0/18:3)	Phosphatidylethanolamine	PE Plasmalogen	53854	DMS-MS	100010002		HMDB11345	0.1298	0.0526	0.0723	0.0526	0.0526	0.0526	0.0526	0.1146	0.1023	0.0526	0.0857	0.0526	0.1203	0.0526	0.0738	0.0567	0.0526	0.0526	0.1149	0.0526	0.0526	0.0526	0.0526	0.0526	0.1077	0.0526	0.1003	0.0526	0.0526	0.0526	0.0526	0.0626	0.0526	0.0718	0.0526	0.076	0.0623	0.0526	0.0526	0.0526	0.1047
6965	PE(P-16:0/20:1)	Phosphatidylethanolamine	PE Plasmalogen	53520	DMS-MS	100009668		HMDB11348	0.0404	0.0404	0.0545	0.0404	0.0404	0.0404	0.0404	0.0404	0.0404	0.0404	0.0438	0.0494	0.0448	0.0404	0.0404	0.0404	0.0477	0.0404	0.0404	0.0404	0.0404	0.0404	0.0404	0.0404	0.0404	0.0404	0.0433	0.0615	0.0404	0.0404	0.0404	0.0404	0.0404	0.0404	0.0404	0.0417	0.0404	0.0429	0.0404	0.0404	0.0504
6966	PE(P-16:0/20:2)	Phosphatidylethanolamine	PE Plasmalogen	54376	DMS-MS	100010524		HMDB11349	0.0394	0.0394	0.0575	0.0394	0.0394	0.0597	0.0394	0.0822	0.0394	0.0644	0.0394	0.0394	0.0742	0.0394	0.0612	0.0603	0.0394	0.0394	0.0758	0.0394	0.0434	0.0394	0.0394	0.0394	0.0612	0.0394	0.0713	0.0829	0.0394	0.0394	0.0507	0.0394	0.0394	0.0631	0.0394	0.0394	0.078	0.0394	0.0544	0.0394	0.0394
6967	PE(P-16:0/20:3)	Phosphatidylethanolamine	PE Plasmalogen	53855	DMS-MS	100010003		HMDB11351	0.6324	0.8314	1.0304	0.7827	0.6535	0.9146	0.2986	1.2517	0.9221	1.0084	0.8796	0.2898	1.01	0.3553	0.6568	0.8016	0.3743	0.4141	0.8068	0.2155	0.4409	0.1906	0.1046	0.4904	0.6747	0.4647	1.1152	1.1656	0.4095	0.2401	0.5586	0.7002	0.3361	0.7875	0.225	0.8509	1.5319	0.4972	0.4662	0.3536	1.1509
6968	PE(P-16:0/20:4)	Phosphatidylethanolamine	PE Plasmalogen	54020	DMS-MS	100010168		HMDB11353	6.2377	11.9575	10.3513	8.4599	4.8722	10.9953	3.8019	19.8456	12.353	12.4762	8.7966	2.1394	12.4931	3.9649	9.0473	13.5545	7.0173	4.4775	9.2299	3.3593	5.5598	4.2954	1.3463	4.6371	11.4152	4.5786	11.0079	12.5782	4.7641	2.9503	4.8538	5.948	4.2273	9.404	4.1089	10.7786	13.478	5.6396	4.2883	4.8641	13.5697
6969	PE(P-16:0/20:5)	Phosphatidylethanolamine	PE Plasmalogen	54562	DMS-MS	100010710		HMDB11354	0.9429	0.7067	0.6778	0.6461	1.0792	1.0678	0.2962	2.1633	1.0701	1.4194	0.6766	0.1597	1.0062	0.4739	0.6747	2.6791	2.8987	0.3516	1.6146	0.1959	3.5795	0.1597	0.1597	0.1955	0.6176	0.2688	1.1964	0.4037	1.0084	0.2405	0.1817	0.4562	0.3033	1.1683	0.2167	1.105	2.2114	1.3874	0.5774	0.2568	0.6554
6972	PE(P-16:0/22:4)	Phosphatidylethanolamine	PE Plasmalogen	54206	DMS-MS	100010354		HMDB11358	0.7029	0.9602	1.19	1.1064	0.794	1.1318	0.969	1.3735	1.314	1.1143	1.4933	0.939	1.6762	0.8687	0.9432	0.9296	0.5617	1.2952	1.2752	1.0074	0.5042	0.9109	0.3264	0.9238	0.9317	1.0952	1.1676	2.0706	0.7529	0.7217	0.9851	0.9657	0.8228	0.736	0.4902	1.412	1.7045	0.9138	0.9232	0.9084	1.7929
6973	PE(P-16:0/22:5)	Phosphatidylethanolamine	PE Plasmalogen	53521	DMS-MS	100009669		HMDB11360	1.8761	2.2203	2.5597	1.7967	1.4699	1.6977	1.6446	2.905	3.3818	2.1547	2.7622	1.3005	3.484	1.3933	1.7017	2.9718	1.4337	1.7063	3.1755	1.7913	1.7523	0.9375	0.5226	1.4666	1.9096	1.45	2.8247	3.65	1.4556	0.8386	1.4389	1.9539	1.3328	1.9647	0.9929	3.4452	2.8842	2.599	1.4444	1.8134	3.3604
6974	PE(P-16:0/22:6)	Phosphatidylethanolamine	PE Plasmalogen	53679	DMS-MS	100009827			7.4156	4.9157	5.8666	5.3773	4.4302	6.6871	4.0249	6.1751	6.3937	7.3291	4.7896	2.2912	6.2647	3.4098	5.4982	9.4411	7.7116	2.2561	9.7781	3.025	5.3124	2.2621	1.2097	4.8895	5.6682	4.9982	4.9692	4.8505	3.9346	3.2958	3.8577	5.1566	3.8863	7.6904	2.3091	6.4034	4.8162	6.7691	4.1302	3.203	5.3446
6975	PE(P-16:1/18:1)	Phosphatidylethanolamine	PE Plasmalogen	54207	DMS-MS	100010355			0.0414	0.0543	0.0296	0.0296	0.0296	0.0296	0.0296	0.0296	0.0296	0.0518	0.0296	0.0296	0.0296	0.0296	0.0296	0.0296	0.0296	0.0296	0.0296	0.0296	0.0296	0.0296	0.0296	0.0296	0.0296	0.0296	0.0296	0.0488	0.0296	0.0296	0.0296	0.0296	0.0296	0.0296	0.0296	0.0453	0.0296	0.0296	0.0296	0.0296	0.0296
6977	PE(P-18:0/16:0)	Phosphatidylethanolamine	PE Plasmalogen	53337	DMS-MS	100009485		HMDB11371	0.2483	0.1459	0.2275	0.2264	0.1286	0.2072	0.1776	0.3196	0.3586	0.2925	0.2527	0.1282	0.3787	0.1181	0.2246	0.2549	0.2051	0.1375	0.2246	0.2564	0.1399	0.0625	0.0532	0.2836	0.2105	0.1827	0.2695	0.3972	0.1776	0.1662	0.157	0.1705	0.1616	0.1745	0.0987	0.3191	0.2298	0.2813	0.155	0.1582	0.299
6978	PE(P-18:0/16:1)	Phosphatidylethanolamine	PE Plasmalogen	53857	DMS-MS	100010005		HMDB11372	0.0632	0.0452	0.0511	0.068	0.04	0.053	0.04	0.0575	0.0574	0.0849	0.06	0.04	0.1163	0.04	0.0686	0.0672	0.04	0.0862	0.04	0.04	0.04	0.04	0.04	0.0644	0.0637	0.04	0.0829	0.1341	0.0658	0.0504	0.04	0.0618	0.04	0.04	0.0418	0.0738	0.1324	0.0513	0.04	0.04	0.0904
6979	PE(P-18:0/18:0)	Phosphatidylethanolamine	PE Plasmalogen	53522	DMS-MS	100009670			0.0366	0.0366	0.0442	0.0597	0.0366	0.0466	0.0366	0.0413	0.082	0.0764	0.0694	0.0366	0.077	0.0366	0.0366	0.0688	0.0564	0.0502	0.0366	0.0603	0.0366	0.0366	0.0366	0.0366	0.0366	0.0366	0.0621	0.0934	0.0366	0.0366	0.0366	0.0366	0.0366	0.0366	0.0366	0.063	0.0749	0.0513	0.0709	0.0402	0.063
6980	PE(P-18:0/18:1)	Phosphatidylethanolamine	PE Plasmalogen	53338	DMS-MS	100009486		HMDB11375	0.9896	1.1827	1.4426	1.7241	0.7728	1.3792	1.108	1.5182	2.2091	1.9696	1.425	0.9098	2.401	0.5464	1.5395	1.2206	1.1492	1.0379	1.5334	0.8984	0.7948	0.4285	0.3244	1.1098	1.3392	1.2365	1.7312	3.0229	1.2073	0.9753	0.9698	0.8572	0.845	1.1412	0.574	1.8748	2.5118	1.3804	1.3177	0.9516	1.9395
6981	PE(P-18:0/18:2)	Phosphatidylethanolamine	PE Plasmalogen	54377	DMS-MS	100010525		HMDB11376	3.6957	3.2124	4.356	6.404	2.5052	5.4861	4.5646	4.9799	8.7131	4.9623	6.5685	4.1936	9.5371	2.6072	8.0523	3.3499	3.8237	4.5887	6.1025	3.5831	3.5954	0.9533	1.2199	5.1463	5.7372	3.6652	6.5158	8.8218	4.3252	3.0499	3.9684	2.6774	3.2061	5.5154	1.8525	9.0929	11.3192	3.585	6.1021	3.6758	7.4769
6982	PE(P-18:0/18:3)	Phosphatidylethanolamine	PE Plasmalogen	53523	DMS-MS	100009671		HMDB11378	0.1683	0.1007	0.12	0.0996	0.0704	0.1115	0.0829	0.114	0.1553	0.1171	0.1421	0.1058	0.2786	0.0459	0.1981	0.0906	0.15	0.123	0.2583	0.131	0.0459	0.0459	0.0459	0.0808	0.1421	0.0459	0.1688	0.1358	0.0799	0.0459	0.0459	0.109	0.0459	0.1034	0.049	0.1458	0.2389	0.0895	0.1147	0.0879	0.1816
6984	PE(P-18:0/20:1)	Phosphatidylethanolamine	PE Plasmalogen	53339	DMS-MS	100009487		HMDB11381	0.0337	0.0337	0.0594	0.0337	0.0337	0.0337	0.0337	0.0337	0.0672	0.0337	0.0337	0.0337	0.0337	0.0337	0.0337	0.0337	0.0337	0.0337	0.0337	0.0467	0.0337	0.0337	0.0337	0.0337	0.0337	0.0337	0.0337	0.0337	0.0337	0.0337	0.0337	0.0337	0.0337	0.0337	0.0337	0.0337	0.06	0.0337	0.0337	0.0337	0.0412
6985	PE(P-18:0/20:2)	Phosphatidylethanolamine	PE Plasmalogen	53340	DMS-MS	100009488		HMDB11382	0.0673	0.0355	0.0622	0.1022	0.075	0.078	0.0636	0.0866	0.0875	0.0995	0.0692	0.0355	0.1042	0.0355	0.0834	0.0706	0.0355	0.0355	0.0355	0.0355	0.0355	0.0355	0.0355	0.0801	0.0645	0.0355	0.0926	0.128	0.075	0.0581	0.0355	0.0355	0.0355	0.0635	0.0355	0.1	0.1139	0.0355	0.0885	0.0355	0.1287
6986	PE(P-18:0/20:3)	Phosphatidylethanolamine	PE Plasmalogen	54564	DMS-MS	100010712		HMDB11384	0.989	1.222	1.403	1.4866	1.0196	1.6493	0.6912	1.43	1.6823	1.6586	1.5511	0.5916	1.9546	0.7481	1.4564	1.1558	0.7599	0.8651	1.6003	0.3717	0.7393	0.4305	0.1991	0.9855	1.0905	0.6403	1.6134	2.3326	0.8558	0.5853	0.9428	0.8337	0.7507	1.1336	0.5378	1.8282	2.8839	1.005	0.9792	0.6843	1.6143
6987	PE(P-18:0/20:4)	Phosphatidylethanolamine	PE Plasmalogen	53524	DMS-MS	100009672		HMDB11386	11.0766	21.2652	18.3287	20.9188	8.5158	24.5859	9.3421	24.9424	29.1238	22.4171	19.6647	5.3961	29.1609	9.0052	21.2517	20.9217	13.9671	11.9014	23.173	7.2691	9.7376	9.5055	2.6717	10.7287	19.8005	7.8692	20.9003	33.9721	9.9691	7.7559	10.359	8.7622	11.1132	15.652	11.4983	30.2419	27.7514	11.5601	12.9748	11.6267	24.8198
6988	PE(P-18:0/20:5)	Phosphatidylethanolamine	PE Plasmalogen	54208	DMS-MS	100010356		HMDB11387	2.2071	1.7625	1.795	2.1194	2.2581	3.4078	1.02	3.9961	3.5052	3.0899	2.022	0.3425	3.2058	1.1223	1.7562	5.5165	7.0998	1.0225	5.3358	0.6874	7.5863	0.3992	0.2026	0.4494	1.3235	0.6825	2.4332	1.3445	2.2276	0.7914	0.6871	0.78	0.9281	1.9483	0.7713	4.6	4.9543	3.4513	2.9073	0.7911	1.9108
6991	PE(P-18:0/22:4)	Phosphatidylethanolamine	PE Plasmalogen	53680	DMS-MS	100009828		HMDB11391	0.4152	0.6423	0.7542	0.8392	0.4946	0.6518	0.5585	0.8228	1.0716	0.7314	1.0231	0.62	1.1723	0.5944	0.8042	0.7395	0.4507	0.9903	0.8617	0.7115	0.3658	0.7843	0.2491	0.6089	0.689	0.7738	0.696	1.5656	0.6072	0.5407	0.6467	0.4943	0.3633	0.534	0.4049	1.059	1.3167	0.6533	0.8063	0.7629	1.0988
6992	PE(P-18:0/22:5)	Phosphatidylethanolamine	PE Plasmalogen	53681	DMS-MS	100009829		HMDB11393	1.3184	1.6144	1.8078	1.8089	1.0226	1.3533	1.3638	1.9225	2.817	1.7217	2.3062	0.9706	3.2234	1.0894	1.7041	2.2975	1.5808	1.4365	2.966	1.2789	1.3347	0.7973	0.4169	1.1919	1.7889	1.0548	2.2516	2.9025	1.221	0.7891	1.0513	1.1844	1.0135	1.5395	1.0847	3.3333	2.6937	2.1787	1.5933	1.4248	2.4167
6993	PE(P-18:0/22:6)	Phosphatidylethanolamine	PE Plasmalogen	54209	DMS-MS	100010357		HMDB11394	8.4539	7.0608	6.706	8.6098	5.3925	8.234	5.5322	6.4645	9.3715	8.8452	6.3526	2.4439	10.1468	4.1461	7.8209	9.8427	11.9322	2.829	14.5631	3.58	5.9129	3.1919	1.5446	6.2651	8.4669	5.7474	6.5716	7.5644	5.7811	4.4879	5.0902	4.9549	4.8943	9.4386	3.584	10.5495	7.5631	8.1022	7.0326	4.0216	6.2633
6995	PE(P-18:1/16:0)	Phosphatidylethanolamine	PE Plasmalogen	54565	DMS-MS	100010713		HMDB11437	0.2125	0.1945	0.2088	0.2667	0.1693	0.2144	0.1683	0.3428	0.3305	0.2935	0.1911	0.1745	0.3371	0.1202	0.1896	0.2417	0.3462	0.141	0.2295	0.3528	0.1389	0.0623	0.0547	0.2442	0.1709	0.3594	0.2028	0.3145	0.1482	0.1811	0.1436	0.2587	0.187	0.118	0.0924	0.3812	0.2373	0.3618	0.1464	0.1434	0.3185
6996	PE(P-18:1/16:1)	Phosphatidylethanolamine	PE Plasmalogen	53341	DMS-MS	100009489		HMDB11438	0.0254	0.0392	0.0254	0.0254	0.0254	0.0254	0.0254	0.0428	0.0531	0.0254	0.0254	0.0254	0.0793	0.0254	0.0254	0.0571	0.0254	0.0646	0.0254	0.0254	0.0254	0.0254	0.0254	0.0254	0.0254	0.0254	0.0641	0.0795	0.0254	0.0254	0.0254	0.0551	0.0254	0.0254	0.0254	0.0455	0.072	0.044	0.0254	0.0254	0.0473
6997	PE(P-18:1/18:0)	Phosphatidylethanolamine	PE Plasmalogen	54566	DMS-MS	100010714		HMDB11439	0.0423	0.0423	0.0423	0.0423	0.0423	0.0423	0.0423	0.0423	0.0496	0.0423	0.0423	0.0423	0.0423	0.0423	0.0423	0.0423	0.0423	0.0423	0.0423	0.0423	0.0423	0.0423	0.0423	0.0423	0.0423	0.0504	0.0423	0.0474	0.0423	0.0423	0.0423	0.0423	0.0423	0.0423	0.0423	0.0642	0.0423	0.0423	0.0423	0.0423	0.0499
6998	PE(P-18:1/18:1)	Phosphatidylethanolamine	PE Plasmalogen	54210	DMS-MS	100010358		HMDB11441	0.5957	0.822	1.014	0.9486	0.4169	0.9696	0.7218	0.8525	1.2435	0.9991	0.7805	0.7232	1.4687	0.3591	0.8284	0.723	0.9322	0.5654	0.782	0.8491	0.4257	0.2547	0.1992	0.5603	0.6806	1.1512	0.9237	1.586	0.7639	0.6521	0.6124	0.561	0.5503	0.5775	0.3242	1.1467	1.1154	0.7044	0.7284	0.5225	1.188
6999	PE(P-18:1/18:2)	Phosphatidylethanolamine	PE Plasmalogen	54211	DMS-MS	100010359		HMDB11442	1.7854	1.5136	2.0281	2.1472	1.0576	2.2731	1.6756	2.0732	3.5074	1.6734	2.4815	1.8537	3.7424	1.1204	2.7591	1.3874	1.9317	1.8133	2.2112	1.8072	1.5325	0.3941	0.4845	1.9785	2.1688	2.1802	2.4372	3.3724	1.6425	1.376	1.451	1.1052	1.4124	1.8828	0.7583	3.1214	3.2621	1.575	2.2603	1.1995	3.1596
7000	PE(P-18:1/18:3)	Phosphatidylethanolamine	PE Plasmalogen	54379	DMS-MS	100010527		HMDB11444	0.1213	0.0497	0.0497	0.0497	0.0497	0.0497	0.0497	0.0497	0.0902	0.0654	0.0497	0.0843	0.1414	0.0497	0.1132	0.0497	0.0497	0.0497	0.1272	0.115	0.0497	0.0497	0.0497	0.0497	0.052	0.0497	0.0839	0.1072	0.0619	0.06	0.0497	0.1013	0.0497	0.0732	0.0497	0.0704	0.0912	0.0497	0.0497	0.0497	0.0916
7002	PE(P-18:1/20:1)	Phosphatidylethanolamine	PE Plasmalogen	54212	DMS-MS	100010360		HMDB11447	0.0276	0.0276	0.0276	0.0276	0.0276	0.0276	0.0276	0.0276	0.0276	0.0276	0.0276	0.0276	0.0276	0.0276	0.0276	0.0276	0.0447	0.0276	0.0276	0.0276	0.0276	0.0276	0.0276	0.0276	0.0276	0.0276	0.0276	0.0276	0.0276	0.0276	0.0276	0.0276	0.0276	0.0276	0.0276	0.0276	0.0276	0.0276	0.0276	0.0276	0.0276
7003	PE(P-18:1/20:2)	Phosphatidylethanolamine	PE Plasmalogen	53342	DMS-MS	100009490		HMDB11448	0.0487	0.0487	0.0644	0.0487	0.0487	0.0597	0.0487	0.0487	0.0487	0.0487	0.0487	0.0487	0.0487	0.0487	0.0487	0.0487	0.0487	0.0487	0.0599	0.0487	0.0487	0.0487	0.0487	0.0487	0.0487	0.0487	0.0493	0.073	0.0487	0.0487	0.0487	0.0487	0.0487	0.0487	0.0487	0.075	0.0487	0.0487	0.0487	0.0487	0.0487
7004	PE(P-18:1/20:3)	Phosphatidylethanolamine	PE Plasmalogen	53682	DMS-MS	100009830		HMDB11450	0.4481	0.5313	0.7153	0.5191	0.4246	0.6615	0.2851	0.6624	0.7774	0.5889	0.6153	0.2379	0.6551	0.2904	0.5405	0.4566	0.3027	0.39	0.5301	0.1966	0.3091	0.1609	0.0775	0.4126	0.4566	0.2738	0.582	0.9566	0.3189	0.2388	0.392	0.3102	0.3268	0.4189	0.1948	0.6343	1.0723	0.4301	0.3503	0.2451	0.8043
7005	PE(P-18:1/20:4)	Phosphatidylethanolamine	PE Plasmalogen	53859	DMS-MS	100010007		HMDB11451	5.4954	10.2418	9.1411	8.6075	4.3603	10.9506	4.2056	12.5349	14.1543	9.28	8.7097	2.7099	11.3834	4.1588	8.3423	8.6035	6.8627	5.3231	8.4492	4.4842	4.3775	4.3143	1.2401	4.6475	8.7826	4.4995	9.2713	15.2942	5.1882	3.9549	4.5085	4.1316	4.8251	6.408	4.6431	10.7194	10.3457	6.0528	5.0717	4.5047	12.7558
7006	PE(P-18:1/20:5)	Phosphatidylethanolamine	PE Plasmalogen	54380	DMS-MS	100010528		HMDB11420	0.9429	0.7585	0.7289	0.6658	1.0863	1.1387	0.3787	1.437	1.4411	1.0445	0.7197	0.1527	1.17	0.4772	0.5168	1.8313	3.1418	0.4931	1.5997	0.3205	2.9455	0.1527	0.1527	0.1527	0.4588	0.3519	1.0286	0.5387	1.2859	0.3207	0.2821	0.289	0.4081	0.8135	0.2716	1.72	1.8986	1.6739	0.9117	0.2413	0.6323
7009	PE(P-18:1/22:4)	Phosphatidylethanolamine	PE Plasmalogen	54567	DMS-MS	100010715		HMDB11424	0.2714	0.368	0.3325	0.3329	0.1797	0.3506	0.3069	0.2677	0.388	0.2629	0.3283	0.2496	0.4412	0.2213	0.2854	0.2672	0.1925	0.3004	0.3846	0.3633	0.1362	0.2948	0.109	0.2739	0.2662	0.2868	0.3324	0.5892	0.2877	0.3009	0.3106	0.2368	0.2631	0.1811	0.1534	0.4846	0.3878	0.2829	0.2726	0.258	0.4431
7010	PE(P-18:1/22:5)	Phosphatidylethanolamine	PE Plasmalogen	53343	DMS-MS	100009491		HMDB11459	0.7197	0.7182	0.8265	0.6707	0.4417	0.6501	0.6138	0.8005	1.0369	0.6305	0.8278	0.5524	1.2872	0.4704	0.6337	0.8609	0.7148	0.6349	1.2368	0.8285	0.6034	0.2994	0.1815	0.4705	0.6115	0.6952	0.8716	1.0975	0.5883	0.4471	0.3961	0.5641	0.5253	0.5006	0.4209	1.2895	0.8055	0.9274	0.5794	0.5265	0.9667
7011	PE(P-18:1/22:6)	Phosphatidylethanolamine	PE Plasmalogen	54022	DMS-MS	100010170		HMDB11460	4.7593	3.4763	3.7773	3.5309	2.785	4.7247	3.1109	3.2564	4.2502	3.9442	3.1684	1.3965	4.8226	2.0514	3.4384	5.0115	7.3145	1.4434	6.4829	2.525	3.4627	1.5862	0.8402	2.9387	3.776	4.2374	3.0238	3.2972	3.5593	2.6974	2.7052	2.6887	2.7892	4.3301	1.6216	4.9651	3.0725	4.8924	3.0435	1.8913	3.2535
7012	PE(P-18:2/18:2)	Phosphatidylethanolamine	PE Plasmalogen	54214	DMS-MS	100010362		HMDB09093	0.1078	0.0868	0.1132	0.1159	0.0793	0.0946	0.0775	0.1479	0.2086	0.0882	0.1583	0.1186	0.1811	0.101	0.1761	0.0916	0.0902	0.1154	0.1215	0.1451	0.0948	0.0383	0.0383	0.1353	0.1031	0.1168	0.1689	0.1654	0.1032	0.0843	0.0746	0.0638	0.0973	0.1174	0.0558	0.1514	0.1214	0.1045	0.1122	0.0694	0.1985
7013	PE(P-18:2/20:4)	Phosphatidylethanolamine	PE Plasmalogen	54215	DMS-MS	100010363			0.2436	0.3397	0.3933	0.2672	0.2164	0.3106	0.1637	0.6012	0.4757	0.4038	0.3325	0.1387	0.5039	0.2597	0.3649	0.382	0.2177	0.2604	0.3817	0.309	0.2906	0.2029	0.0538	0.2849	0.2799	0.19	0.4872	0.592	0.2989	0.1643	0.1762	0.2154	0.2653	0.29	0.1847	0.3815	0.3432	0.3032	0.2418	0.1648	0.7574
7014	PE(P-18:2/22:6)	Phosphatidylethanolamine	PE Plasmalogen	54023	DMS-MS	100010171			0.2497	0.1944	0.2129	0.1423	0.2247	0.1423	0.1423	0.1672	0.2112	0.1526	0.1423	0.1423	0.2643	0.1477	0.1423	0.2504	0.2382	0.1423	0.3632	0.1423	0.2581	0.1423	0.1423	0.1423	0.1891	0.1423	0.1826	0.1423	0.2498	0.1423	0.1423	0.1423	0.1423	0.2836	0.1423	0.232	0.1423	0.1423	0.1423	0.1423	0.1557
7292	PI(16:0/16:0)	Phosphatidylinositol	PI Ester	54568	DMS-MS	100010716		HMDB09778	0.6267	0.0961	0.1303	0.137	0.1629	0.1469	0.1534	0.1161	0.1641	1.0196	0.2517	0.0936	0.1555	0.0937	0.2308	0.309	0.0502	0.208	0.1579	0.0555	0.0794	0.0678	0.0454	1.3119	0.1209	0.0929	0.3361	0.1234	0.1576	0.1685	0.076	0.2285	0.1489	0.2835	0.0979	0.1531	0.1449	0.2654	0.1944	0.1116	0.3368
7293	PI(16:0/16:1)	Phosphatidylinositol	PI Ester	54381	DMS-MS	100010529		HMDB09779	0.388	0.0916	0.086	0.1316	0.1104	0.0723	0.1141	0.0943	0.058	0.3855	0.1062	0.1121	0.1068	0.0883	0.1497	0.1774	0.0378	0.3009	0.1339	0.0493	0.0455	0.0797	0.0378	0.852	0.092	0.0569	0.3271	0.0854	0.0757	0.118	0.0586	0.3772	0.0878	0.2126	0.1096	0.062	0.3847	0.3006	0.1058	0.1013	0.3357
7295	PI(16:0/18:1)	Phosphatidylinositol	PI Ester	53344	DMS-MS	100009492		HMDB09783	2.0342	1.0617	1.3057	1.3389	0.7792	0.8179	1.5773	1.046	1.111	2.4021	1.5981	0.541	1.3597	0.5688	1.2413	1.1166	0.8247	1.3094	1.1694	0.5686	0.517	0.4276	0.3424	3.1625	0.964	1.7469	1.8681	1.2959	1.408	1.3065	0.6313	1.0265	0.8556	1.3104	0.4879	1.1617	2.0621	1.833	1.506	1.2555	1.8399
7296	PI(16:0/18:2)	Phosphatidylinositol	PI Ester	54382	DMS-MS	100010530		HMDB09784	3.1733	1.007	0.9991	1.386	1.4911	0.7277	1.5504	1.3525	1.4823	2.1012	1.1772	1.0184	1.3537	1.1146	1.5633	1.767	0.7921	1.9061	1.7832	1.0729	1.0623	0.8031	0.4336	4.2733	1.4407	1.6181	2.7685	1.1576	1.1497	1.5362	0.6581	1.832	1.2427	2.4393	0.9054	1.3286	1.9464	2.0709	1.9329	1.5939	2.5469
7297	PI(16:0/18:3)	Phosphatidylinositol	PI Ester	54216	DMS-MS	100010364			0.0553	0.0314	0.0314	0.0314	0.0314	0.0314	0.0314	0.0314	0.0314	0.0314	0.0314	0.0314	0.0314	0.0314	0.0314	0.0314	0.0314	0.0314	0.0314	0.0314	0.0314	0.0314	0.0314	0.0314	0.0314	0.0314	0.0314	0.0314	0.0314	0.0314	0.0314	0.0314	0.0314	0.0314	0.0314	0.0314	0.0314	0.0353	0.0314	0.0314	0.0314
7301	PI(16:0/20:3)	Phosphatidylinositol	PI Ester	53860	DMS-MS	100010008		HMDB09788	0.5213	0.2893	0.2372	0.2677	0.2516	0.1741	0.1856	0.2662	0.2262	0.2884	0.2426	0.3091	0.2209	0.2233	0.2661	0.2494	0.1633	0.3582	0.3841	0.155	0.2205	0.0605	0.0644	1.4137	0.2063	0.2503	0.3859	0.2448	0.2158	0.2206	0.1914	0.5104	0.2787	0.4007	0.1655	0.272	0.6788	0.8118	0.3138	0.2285	0.3952
7302	PI(16:0/20:4)	Phosphatidylinositol	PI Ester	53861	DMS-MS	100010009		HMDB09789	2.0854	1.3064	1.0887	1.2119	0.6105	0.7553	1.0452	1.1892	0.9561	1.3981	1.1268	0.727	1.2454	0.8413	1.524	1.2194	0.7512	1.6891	1.8072	0.8899	0.8719	0.5046	0.2373	3.4895	1.1137	1.0507	1.674	1.5824	1.0107	1.0611	0.5378	1.5611	1.2515	1.362	1.229	1.5896	3.0558	2.9185	1.5463	1.3208	1.6685
7306	PI(16:0/22:4)	Phosphatidylinositol	PI Ester	54383	DMS-MS	100010531		HMDB09794	0.1102	0.0515	0.0515	0.0515	0.0515	0.0515	0.0515	0.0515	0.0515	0.0698	0.0515	0.0515	0.0515	0.0515	0.0515	0.0515	0.0515	0.1073	0.0515	0.0515	0.0515	0.0515	0.0515	0.2498	0.0515	0.0515	0.0901	0.0515	0.0515	0.0515	0.0515	0.0948	0.0515	0.0515	0.0515	0.0515	0.1345	0.1328	0.0515	0.0515	0.141
7307	PI(16:0/22:5)	Phosphatidylinositol	PI Ester	53527	DMS-MS	100009675		HMDB09796	0.1843	0.1221	0.1237	0.103	0.0877	0.0668	0.0668	0.1046	0.118	0.1559	0.1556	0.0668	0.0997	0.0938	0.1201	0.1946	0.0855	0.1345	0.2383	0.0668	0.0895	0.0668	0.0668	0.2508	0.0818	0.098	0.2637	0.1156	0.1086	0.1188	0.0668	0.2183	0.0826	0.153	0.0832	0.1085	0.1527	0.2943	0.1462	0.1231	0.2125
7308	PI(16:0/22:6)	Phosphatidylinositol	PI Ester	54217	DMS-MS	100010365			0.2497	0.1472	0.1472	0.1472	0.1472	0.1472	0.2673	0.1472	0.1472	0.3202	0.1472	0.1472	0.1472	0.1472	0.1472	0.2305	0.1472	0.1472	0.2505	0.1472	0.1918	0.1472	0.1472	0.3404	0.1472	0.3043	0.1508	0.1472	0.1472	0.1925	0.1472	0.1472	0.1472	0.2458	0.1472	0.1472	0.3204	0.2876	0.1705	0.1472	0.1472
7327	PI(18:0/16:0)	Phosphatidylinositol	PI Ester	53345	DMS-MS	100009493	C13888	HMDB09805	0.234	0.0714	0.1023	0.1151	0.0782	0.0685	0.0911	0.0799	0.1113	0.3947	0.1162	0.0527	0.0947	0.0564	0.116	0.1159	0.033	0.1481	0.1272	0.0397	0.0752	0.0586	0.033	0.4409	0.0771	0.0938	0.1793	0.0742	0.1009	0.1398	0.052	0.0967	0.0669	0.1227	0.0611	0.0947	0.1473	0.1554	0.1321	0.0851	0.1844
7328	PI(18:0/16:1)	Phosphatidylinositol	PI Ester	54569	DMS-MS	100010717		HMDB09806	0.4489	0.1323	0.1414	0.1262	0.1983	0.1268	0.1211	0.1415	0.102	0.7128	0.1196	0.1328	0.1879	0.1278	0.1734	0.2468	0.1074	0.3632	0.2149	0.083	0.0963	0.0993	0.0705	1.1003	0.1115	0.076	0.4938	0.1437	0.1471	0.2521	0.108	0.4667	0.0939	0.2771	0.1504	0.1135	0.316	0.2994	0.1255	0.1355	0.4628
7331	PI(18:0/18:1)	Phosphatidylinositol	PI Ester	53684	DMS-MS	100009832			2.0819	1.5536	1.9828	1.5068	0.6913	0.9865	1.5416	1.119	1.6196	2.8725	2.1747	0.7331	1.9578	0.6244	1.562	1.1227	1.6169	1.2494	1.4559	0.7614	0.6688	0.3798	0.4258	2.6944	1.0537	2.127	1.8132	1.5589	1.595	1.876	0.6736	1.0241	1.2358	1.1708	0.5364	1.5001	1.956	2.3094	1.8074	1.4001	1.7723
7332	PI(18:0/18:2)	Phosphatidylinositol	PI Ester	54218	DMS-MS	100010366		HMDB09809	6.4897	2.8583	3.439	3.6554	3.0064	2.0525	3.8938	3.2711	4.342	5.5254	2.9669	3.3821	3.9882	3.1714	4.9242	3.6905	3.8741	5.0909	5.1026	3.4684	2.9566	2.2113	1.4854	7.2086	3.5551	4.2006	6.0242	3.4048	3.4976	5.6136	1.9744	3.4285	3.0363	5.1172	2.7094	3.8429	3.938	4.5622	5.6861	4.1039	5.3413
7333	PI(18:0/18:3)	Phosphatidylinositol	PI Ester	54024	DMS-MS	100010172		HMDB09811	0.206	0.1438	0.1357	0.1636	0.1579	0.1281	0.1732	0.1267	0.1304	0.1773	0.1753	0.1647	0.1343	0.1408	0.1753	0.1797	0.1463	0.2256	0.2328	0.1362	0.1125	0.13	0.1001	0.1635	0.1512	0.133	0.217	0.1429	0.1741	0.2096	0.1149	0.202	0.1462	0.1495	0.1423	0.1089	0.2325	0.2733	0.1285	0.1624	0.1617
7336	PI(18:0/20:2)	Phosphatidylinositol	PI Ester	53528	DMS-MS	100009676		HMDB09812	0.2559	0.1298	0.1468	0.1385	0.0895	0.1171	0.091	0.1344	0.1605	0.1873	0.1519	0.2345	0.1805	0.133	0.1378	0.1236	0.0922	0.2462	0.238	0.1135	0.1231	0.0614	0.0614	0.5314	0.1113	0.1541	0.1559	0.1767	0.1579	0.1524	0.1897	0.1456	0.1178	0.2147	0.0812	0.1871	0.2216	0.3531	0.2478	0.1276	0.1568
7337	PI(18:0/20:3)	Phosphatidylinositol	PI Ester	54025	DMS-MS	100010173		HMDB09814	2.7503	1.9966	1.9626	1.6945	1.3603	1.1488	1.1431	1.404	1.6363	1.7066	1.5511	1.9428	1.4396	1.3147	1.49	1.7342	1.2259	2.0758	2.7577	1.2324	1.6798	0.6447	0.3486	3.7225	1.054	1.661	1.9081	2.0942	1.3905	1.6924	1.5926	2.1214	1.943	2.1964	1.2118	2.0448	2.9176	3.9884	2.4051	1.4974	1.7287
7338	PI(18:0/20:4)	Phosphatidylinositol	PI Ester	54026	DMS-MS	100010174		HMDB09815	13.8765	12.4038	11.6346	11.0313	5.4982	8.1859	8.6467	9.7067	11.9973	9.9771	9.8302	6.4044	10.8299	8.5663	10.4993	11.1101	10.6293	11.4051	21.9325	9.3404	8.8143	5.8205	2.6087	10.8432	9.1858	10.8854	11.9475	17.5219	9.672	11.5478	7.3457	10.0107	9.7156	10.15	11.5338	14.1551	15.5629	17.6088	16.0925	13.4149	11.8289
7339	PI(18:0/20:5)	Phosphatidylinositol	PI Ester	53529	DMS-MS	100009677			0.1359	0.1359	0.1359	0.1359	0.1359	0.1359	0.1359	0.1359	0.1359	0.1359	0.1359	0.1359	0.1359	0.1359	0.1359	0.1359	0.2444	0.1359	0.1359	0.1359	0.1718	0.1359	0.1359	0.1359	0.1359	0.1359	0.1359	0.1359	0.1359	0.1359	0.1359	0.1359	0.1359	0.1359	0.1359	0.1359	0.1714	0.2569	0.1958	0.1359	0.1359
7341	PI(18:0/22:4)	Phosphatidylinositol	PI Ester	53685	DMS-MS	100009833		HMDB09818	0.1369	0.179	0.1596	0.1678	0.1052	0.1288	0.1436	0.1455	0.1262	0.1505	0.1495	0.1165	0.2118	0.1036	0.1379	0.1025	0.0871	0.2136	0.2169	0.0725	0.0454	0.1	0.0454	0.2888	0.0907	0.1181	0.1667	0.2865	0.1357	0.1674	0.1205	0.1517	0.1153	0.1422	0.0979	0.1292	0.1705	0.3094	0.176	0.1494	0.2125
7342	PI(18:0/22:5)	Phosphatidylinositol	PI Ester	54384	DMS-MS	100010532		HMDB09820	0.361	0.2839	0.2481	0.2075	0.1523	0.163	0.2053	0.2062	0.2101	0.2997	0.2291	0.103	0.2128	0.2117	0.1875	0.3134	0.2797	0.2698	0.5802	0.2089	0.1773	0.1112	0.0737	0.1986	0.2095	0.2214	0.4074	0.2525	0.2133	0.2122	0.1907	0.2464	0.1588	0.2135	0.1681	0.2588	0.3039	0.482	0.2639	0.2549	0.375
7343	PI(18:0/22:6)	Phosphatidylinositol	PI Ester	54219	DMS-MS	100010367		HMDB09821	0.7767	0.3246	0.3786	0.3895	0.2605	0.3624	0.3144	0.3015	0.3279	0.7216	0.312	0.0885	0.3319	0.245	0.2936	0.5409	0.5493	0.2456	0.5965	0.0885	0.4091	0.1768	0.0885	0.5877	0.2814	0.5033	0.4147	0.3329	0.3769	0.4348	0.2601	0.3553	0.2672	0.4892	0.1608	0.3583	0.4622	0.6342	0.5033	0.2333	0.3158
7345	PI(18:1/16:1)	Phosphatidylinositol	PI Ester	54220	DMS-MS	100010368		HMDB09835	0.1409	0.0952	0.0851	0.0737	0.0543	0.0723	0.0717	0.1482	0.0455	0.1994	0.072	0.0947	0.08	0.0598	0.0514	0.0548	0.0583	0.1787	0.0911	0.0671	0.049	0.0392	0.0479	0.445	0.1647	0.0677	0.1532	0.0578	0.0686	0.0951	0.0392	0.0675	0.0607	0.0757	0.075	0.0535	0.1973	0.1248	0.1513	0.0888	0.1489
7346	PI(18:1/18:1)	Phosphatidylinositol	PI Ester	53346	DMS-MS	100009494		HMDB09837	1.6713	2.1494	2.7814	1.4638	0.5638	0.919	1.7388	1.2705	1.4075	1.5677	1.7924	0.6442	2.4584	0.5113	1.431	0.5364	2.0803	1.1848	1.3872	0.8206	0.6122	0.21	0.4711	2.0649	0.9567	3.1454	1.0832	1.647	1.7138	2.2313	0.5979	0.6638	1.5812	0.881	0.639	2.2828	1.59	2.3899	1.7631	1.498	1.4343
7347	PI(18:1/18:2)	Phosphatidylinositol	PI Ester	53530	DMS-MS	100009678		HMDB09838	0.7888	0.5344	0.5462	0.5356	0.3657	0.3625	0.6023	0.6548	0.8637	0.5618	0.5347	0.4256	1.014	0.37	0.8819	0.3456	0.7204	0.7371	0.6944	0.6006	0.5477	0.1864	0.2466	1.3601	0.583	0.8712	0.5045	0.5869	0.5398	0.7885	0.2695	0.3598	0.5662	0.6608	0.4365	0.9257	0.6493	0.9376	0.8395	0.6706	0.6385
7352	PI(18:1/20:3)	Phosphatidylinositol	PI Ester	54027	DMS-MS	100010175		HMDB09843	0.1633	0.1433	0.1148	0.1101	0.0736	0.082	0.1062	0.066	0.0789	0.1063	0.106	0.1002	0.1171	0.0611	0.091	0.0709	0.0807	0.1101	0.1118	0.0578	0.0695	0.029	0.029	0.3378	0.0836	0.0953	0.1105	0.0899	0.0819	0.0822	0.0705	0.1076	0.074	0.0921	0.0526	0.1057	0.2769	0.1885	0.1511	0.0616	0.1053
7353	PI(18:1/20:4)	Phosphatidylinositol	PI Ester	54221	DMS-MS	100010369		HMDB09844	0.6959	0.8622	0.5798	0.5321	0.2164	0.4071	0.4307	0.4081	0.6674	0.419	0.5867	0.3031	0.5457	0.3072	0.5262	0.429	0.5487	0.5964	0.9224	0.4982	0.3642	0.2268	0.1206	0.9212	0.415	0.717	0.5499	0.6425	0.4148	0.4683	0.2245	0.3288	0.4345	0.446	0.5285	0.6665	1.1215	1.0319	0.8224	0.5997	0.6037
7363	PI(18:2/18:2)	Phosphatidylinositol	PI Ester	53686	DMS-MS	100009834		HMDB09850	0.0686	0.0325	0.0325	0.0325	0.0753	0.0325	0.0325	0.1001	0.0845	0.0665	0.0325	0.0758	0.0863	0.0555	0.1004	0.0505	0.0624	0.0695	0.0879	0.0546	0.1071	0.0325	0.0325	0.117	0.0802	0.074	0.071	0.0325	0.0573	0.0876	0.0325	0.0325	0.0596	0.072	0.0569	0.1173	0.0679	0.0902	0.0636	0.0749	0.0325
7802	SM(14:0)	Sphingolipids	Sphingomyelin	54222	DMS-MS	100010370		HMDB12097	19.216	9.4496	12.2687	14.0997	9.949	8.4802	10.9013	10.6456	14.9127	11.8982	13.1094	9.5307	14.4539	8.9016	7.7283	16.2046	8.8035	11.0701	22.4913	6.4985	9.6418	4.6067	4.2938	8.499	7.933	7.2237	19.2845	14.4041	11.0266	10.5655	8.994	11.3912	12.2375	11.32	4.1057	13.1886	14.3963	15.0449	15.4548	12.6505	19.8678
7803	SM(16:0)	Sphingolipids	Sphingomyelin	54385	DMS-MS	100010533		HMDB10169	149.379	123.13	135.501	174.479	101.753	124.616	124.537	116.047	142.475	118.667	127.631	95.8642	148.29	92.499	111.207	126.408	124.609	116.469	197.844	109.531	111.639	81.2804	60.8623	109.385	128.295	110.897	168.283	214.589	139.664	156.26	115.081	113.645	126.225	142.865	68.2746	146.009	169.178	141.334	153.779	140.783	155.362
7804	SM(18:0)	Sphingolipids	Sphingomyelin	54386	DMS-MS	100010534		HMDB01348	30.1808	21.663	25.3919	29.908	23.9648	21.1184	22.7959	22.7046	28.3867	21.8619	24.8248	15.0441	27.6207	20.8687	15.1986	22.8615	16.6933	24.754	38.2839	14.2024	20.0308	17.6788	12.4707	18.8993	22.3841	19.8461	34.9474	45.1324	26.0146	27.7679	24.7495	26.2027	21.4974	35.6299	15.8199	25.9914	28.6665	29.8007	33.6832	26.8479	37.0214
7805	SM(18:1)	Sphingolipids	Sphingomyelin	53862	DMS-MS	100010010		HMDB12101	10.0046	8.748	10.0225	10.6456	7.8023	7.6832	7.6356	8.5071	10.4516	6.7907	9.5381	5.2774	10.3974	6.9583	6.072	7.4201	6.1886	9.7923	14.8763	5.5621	8.0389	7.3374	5.2074	6.8601	8.7385	9.1045	14.2679	18.0463	8.9725	9.6671	8.5663	9.4493	8.373	14.4213	7.3628	10.7933	11.1222	11.538	11.9138	11.6892	13.6706
7806	SM(20:0)	Sphingolipids	Sphingomyelin	53687	DMS-MS	100009835		HMDB12102	47.6881	26.09	33.4412	38.8856	34.0453	27.329	32.603	31.4479	41.1281	34.7639	32.0319	31.2118	43.05	26.0763	31.2626	35.1015	22.8888	38.5598	48.0622	30.1745	24.219	14.6076	14.8533	39.8518	30.6516	32.3588	44.8238	43.1079	31.9291	33.8888	30.0505	32.7599	33.3087	34.5961	18.5598	42.2568	32.9591	37.5239	42.631	33.1993	38.5578
7807	SM(20:1)	Sphingolipids	Sphingomyelin	53531	DMS-MS	100009679			7.3206	5.1786	6.5256	7.2525	5.2698	5.2444	5.9602	6.0398	6.6512	4.8574	6.4976	4.5105	6.7508	4.5756	4.4613	4.5854	4.1193	6.4125	9.7887	4.9047	5.053	3.7509	3.1752	5.5828	5.1116	7.7665	7.7447	8.8189	6.0886	6.813	5.5252	6.1662	6.6687	7.7707	5.2402	7.2489	8.3655	6.9871	8.2849	6.9209	7.9943
7808	SM(22:0)	Sphingolipids	Sphingomyelin	53347	DMS-MS	100009495		HMDB12103	70.62	40.6966	53.7844	67.7136	44.341	39.6458	51.6954	50.585	52.1686	41.9585	48.1217	42.9266	56.3284	36.6461	42.9147	58.2457	45.0898	49.7167	74.3836	49.4355	39.2881	23.2111	21.1988	52.035	50.5716	46.5261	63.0556	65.1558	48.0455	47.7848	40.0788	53.007	48.9504	54.1409	27.019	59.8552	54.9988	56.2943	66.7612	53.3811	55.3063
7809	SM(22:1)	Sphingolipids	Sphingomyelin	54570	DMS-MS	100010718		HMDB12104	41.0746	24.6451	32.0551	38.5887	26.6661	23.1098	28.7548	28.872	30.4723	27.182	28.8382	26.1462	30.3119	20.5656	22.8211	34.3442	23.5037	27.2823	42.6386	26.6936	22.2237	14.926	12.6187	28.5324	24.1919	26.829	40.8621	37.972	27.3153	28.9614	22.8272	32.2514	33.2046	29.4963	17.5781	34.5647	34.7847	32.9295	35.8358	33.552	34.9207
7810	SM(24:0)	Sphingolipids	Sphingomyelin	53863	DMS-MS	100010011		HMDB11697	35.0606	22.166	26.7112	38.2752	22.5993	19.7207	22.5456	28.6437	23.5098	25.2118	19.7942	22.3117	26.0021	17.9507	18.9276	31.171	25.0904	21.1988	37.3484	24.9427	21.5359	15.7941	12.2729	19.2928	23.4546	20.9293	29.3626	38.101	23.9774	25.0177	22.8118	28.7227	24.2457	23.4665	14.9261	26.8919	25.6572	26.5205	33.0553	26.2347	24.6377
7811	SM(24:1)	Sphingolipids	Sphingomyelin	54028	DMS-MS	100010176		HMDB12107	73.3551	51.2615	57.4312	74.5634	45.249	49.6946	40.4386	55.1147	52.7205	53.2182	43.9885	45.1493	63.38	43.7127	45.6157	66.4812	57.0157	49.0381	71.3528	48.3817	43.0407	39.7542	25.6905	47.603	42.739	46.0787	69.6097	78.8901	55.0406	64.2528	55.0395	65.7379	56.53	54.2043	41.1227	56.8002	62.193	64.4388	65.4478	55.7132	60.1686
7812	SM(26:0)	Sphingolipids	Sphingomyelin	54387	DMS-MS	100010535		HMDB11698	0.3777	0.283	0.3111	0.4022	0.2612	0.3218	0.2808	0.3448	0.3647	0.3174	0.3396	0.2313	0.4355	0.2469	0.2911	0.3965	0.4142	0.2842	0.518	0.3337	0.2594	0.2039	0.167	0.3008	0.3183	0.2521	0.3499	0.3987	0.3159	0.3479	0.3147	0.287	0.3409	0.3111	0.1681	0.3238	0.3242	0.3331	0.3562	0.3275	0.3754
7813	SM(26:1)	Sphingolipids	Sphingomyelin	53348	DMS-MS	100009496			0.6428	0.505	0.5362	0.688	0.4623	0.5912	0.3882	0.5278	0.583	0.6133	0.4893	0.4166	0.7486	0.4759	0.5127	0.6871	0.7337	0.4986	0.7447	0.5082	0.4252	0.4205	0.2698	0.4791	0.4569	0.3987	0.5665	0.7301	0.573	0.6202	0.5722	0.5539	0.5816	0.5099	0.3637	0.5651	0.5929	0.627	0.6567	0.4785	0.6137
8195	TAG36:0-FA12:0	Triacylglycerol	TAG Ester	54388	DMS-MS	100010536			0.0272	0.0822	0.0308	0.0954	0.0071	0.07	0.6339	0.1047	0.0252	0.0242	0.0409	0.0349	0.0116	0.0229	1.1899	0.0088	0.5482	122.486	0.0428	0.0088	0.0039	0.0088	0.0129	0.1871	0.0337	0.0086	0.0241	0.0691	0.2594	0.0128	0.004	0.0618	0.1836	0.0041	0.0102	0.0214	0.011	0.0085	13.6015	0.2104	0.1542
8196	TAG38:0-FA12:0	Triacylglycerol	TAG Ester	53532	DMS-MS	100009680			0.0528	0.1628	0.0562	0.1764	0.0101	0.0948	0.7147	0.1151	0.0383	0.0407	0.1235	0.0461	0.0121	0.0379	0.7629	0.0168	0.4115	76.9114	0.0833	0.0113	0.0089	0.0092	0.0175	0.2152	0.072	0.0127	0.0515	0.0563	0.4593	0.0142	0.0101	0.14	0.1752	0.0091	0.0186	0.0374	0.0148	0.0171	10.2026	0.3316	0.2901
8204	TAG40:0-FA12:0	Triacylglycerol	TAG Ester	53688	DMS-MS	100009836			0.1013	0.2136	0.0902	0.4527	0.0164	0.1447	1.5989	0.1444	0.0747	0.074	0.2618	0.0784	0.0082	0.0555	1.0884	0.0574	0.3557	52.7839	0.1329	0.0094	0.0059	0.0056	0.0241	0.6613	0.1514	0.0211	0.0775	0.0325	0.6606	0.0071	0.0087	0.5824	0.5106	0.0098	0.0128	0.0652	0.0166	0.047	10.4063	0.5158	0.4187
8206	TAG40:0-FA14:0	Triacylglycerol	TAG Ester	53349	DMS-MS	100009497			0.1887	0.3635	0.1706	0.2904	0.0327	0.0792	0.4973	0.088	0.0936	0.0794	0.4586	0.0455	0.0144	0.1073	0.317	0.1277	0.1917	38.2051	0.2695	0.0131	0.01	0.009	0.04	0.2493	0.2901	0.0122	0.1643	0.0274	1.1902	0.0137	0.0122	0.2819	0.2073	0.0192	0.0147	0.1114	0.029	0.1038	4.9647	0.7788	0.8029
8207	TAG40:0-FA16:0	Triacylglycerol	TAG Ester	53689	DMS-MS	100009837			0.4482	0.4387	0.227	0.3894	0.061	0.0834	0.9341	0.1032	0.1412	0.1615	0.6745	0.0554	0.0143	0.1162	0.631	0.26	0.1976	42.0396	0.7908	0.0242	0.0111	0.0084	0.0451	0.7734	0.3791	0.0253	0.2453	0.0302	1.2677	0.0081	0.0105	0.4843	0.5721	0.0299	0.0223	0.1506	0.1814	0.1917	4.9947	1.1024	0.974
8225	TAG42:0-FA12:0	Triacylglycerol	TAG Ester	53533	DMS-MS	100009681			0.4208	0.4346	0.2194	0.7153	0.073	0.1571	1.5009	0.1338	0.1507	0.163	0.754	0.1289	0.0153	0.1049	0.9415	0.3758	0.276	33.4642	0.3527	0.0117	0.0138	0.0047	0.0418	0.9085	0.3963	0.0227	0.276	0.0271	1.3193	0.0085	0.0201	1.2393	0.9006	0.0405	0.0168	0.1649	0.042	0.2168	13.7875	0.8808	0.7942
8227	TAG42:0-FA14:0	Triacylglycerol	TAG Ester	54029	DMS-MS	100010177			0.6194	0.685	0.355	0.7917	0.1133	0.1521	1.3231	0.1646	0.2173	0.2279	1.0068	0.1356	0.0289	0.2173	0.5588	0.6681	0.2058	26.5705	0.506	0.032	0.0347	0.0186	0.0788	0.8666	0.6547	0.0343	0.4694	0.0393	2.1369	0.0249	0.0352	1.3083	0.7881	0.0654	0.0402	0.2678	0.0763	0.3567	6.3796	1.3213	1.4514
8229	TAG42:0-FA16:0	Triacylglycerol	TAG Ester	53690	DMS-MS	100009838			1.2076	1.1921	0.6374	1.0233	0.2044	0.1795	1.565	0.1836	0.4239	0.465	2.0192	0.1564	0.0451	0.2897	0.6592	0.8509	0.195	39.8335	1.9664	0.0479	0.0341	0.0168	0.1139	1.7168	1.1399	0.0512	0.7567	0.0511	3.0225	0.0174	0.0435	1.8219	1.3804	0.1214	0.058	0.4237	0.2085	0.6223	6.2914	2.3883	2.2586
8231	TAG42:1-FA12:0	Triacylglycerol	TAG Ester	54030	DMS-MS	100010178			0.2236	0.3794	0.1206	0.8104	0.0335	0.2028	2.0208	0.1227	0.1191	0.1325	0.3657	0.0996	0.0117	0.0567	4.5145	0.1411	0.708	41.9824	0.1636	0.011	0.0109	0.0054	0.0186	0.8544	0.1886	0.0315	0.1449	0.0276	0.5479	0.0077	0.018	0.9322	0.9729	0.0213	0.0169	0.0986	0.0314	0.1073	20.9197	0.6475	0.346
8233	TAG42:1-FA14:0	Triacylglycerol	TAG Ester	53350	DMS-MS	100009498			0.3033	0.5471	0.1654	0.2671	0.0564	0.0342	0.2436	0.0492	0.1179	0.1097	0.4051	0.034	0.0148	0.0854	0.1202	0.234	0.0476	5.2628	0.2189	0.017	0.0145	0.0073	0.0299	0.3472	0.281	0.0161	0.2324	0.0204	0.8746	0.01	0.0206	0.4514	0.1891	0.0295	0.0177	0.1693	0.0512	0.1673	1.3669	0.5887	0.6069
8235	TAG42:1-FA16:0	Triacylglycerol	TAG Ester	53351	DMS-MS	100009499			0.9168	0.483	0.2451	0.3208	0.1382	0.027	0.2028	0.054	0.1791	0.253	0.7963	0.0266	0.0326	0.1072	0.1161	0.5201	0.0261	21.8561	0.6819	0.0361	0.0238	0.0075	0.04	0.8104	0.377	0.023	0.4254	0.0293	0.7668	0.01	0.0229	0.7284	0.5769	0.0768	0.0446	0.2531	0.2489	0.3894	0.779	0.733	0.7771
8236	TAG42:1-FA16:1	Triacylglycerol	TAG Ester	53691	DMS-MS	100009839			0.2661	0.1885	0.0982	0.1808	0.0479	0.0326	0.1803	0.0321	0.0623	0.1027	0.2639	0.0269	0.0146	0.0489	0.0747	0.1611	0.0393	5.908	0.1239	0.0126	0.0126	0.0087	0.0193	0.3272	0.1635	0.0124	0.1644	0.0173	0.3077	0.0114	0.0191	0.4437	0.1811	0.0299	0.0311	0.0645	0.0454	0.1479	1.0916	0.2875	0.3089
8237	TAG42:1-FA18:1	Triacylglycerol	TAG Ester	54223	DMS-MS	100010371			0.5809	0.944	0.2514	0.5723	0.0776	0.1324	1.1659	0.1283	0.2249	0.2423	0.4957	0.0702	0.0296	0.1258	2.9672	0.2565	0.4581	37.9989	0.6942	0.0462	0.0233	0.0106	0.0437	0.9658	0.3817	0.0442	0.3273	0.0458	1.2414	0.0154	0.0243	0.4996	0.8104	0.0476	0.037	0.3709	0.2296	0.2219	12.4294	1.0892	1.015
8238	TAG42:2-FA12:0	Triacylglycerol	TAG Ester	53692	DMS-MS	100009840			0.0475	0.0967	0.0377	0.2311	0.0111	0.0617	0.5564	0.0623	0.0925	0.0721	0.07	0.0402	0.0097	0.0188	1.5737	0.0282	0.3415	12.4164	0.0532	0.0077	0.0064	0.0038	0.0059	0.2931	0.0592	0.0141	0.0702	0.0172	0.0963	0.0067	0.0073	0.1892	0.4329	0.0076	0.0083	0.0398	0.0102	0.0272	9.8463	0.1889	0.0812
8242	TAG42:2-FA18:2	Triacylglycerol	TAG Ester	53352	DMS-MS	100009500			0.2229	0.2489	0.1333	0.2296	0.067	0.0558	0.3636	0.0891	0.1813	0.1501	0.2065	0.0361	0.0227	0.067	1.0302	0.1382	0.2351	13.967	0.3011	0.0276	0.0209	0.0095	0.0261	0.4439	0.1783	0.0273	0.3509	0.0312	0.287	0.0125	0.0191	0.2229	0.4114	0.0332	0.0321	0.1662	0.1541	0.1423	6.4639	0.3902	0.381
8265	TAG44:0-FA12:0	Triacylglycerol	TAG Ester	53693	DMS-MS	100009841			1.112	0.7529	0.4117	0.9987	0.2139	0.2235	1.6359	0.1569	0.3265	0.4892	1.3429	0.2036	0.0647	0.1859	0.7795	0.9387	0.2388	19.13	1.1464	0.0698	0.0621	0.0279	0.0897	2.2639	0.7376	0.1428	0.6496	0.0788	1.7418	0.0427	0.0718	2.6575	1.7978	0.1492	0.1048	0.3243	0.1772	0.581	7.9675	1.3542	1.2247
8267	TAG44:0-FA14:0	Triacylglycerol	TAG Ester	54389	DMS-MS	100010537			2.8301	1.5762	0.9119	1.4257	0.5176	0.1791	1.2748	0.2004	0.5373	0.8189	2.6738	0.2051	0.052	0.4619	0.5766	4.0968	0.1826	15.2001	1.3177	0.0448	0.0804	0.0148	0.1702	2.0722	1.7412	0.0618	2.0766	0.0619	4.1861	0.0316	0.1158	3.4579	1.4149	0.2772	0.1188	0.6753	0.2445	1.9103	7.4927	2.4833	3.0763
8269	TAG44:0-FA16:0	Triacylglycerol	TAG Ester	54031	DMS-MS	100010179			3.9269	2.2826	1.357	2.4563	0.6937	0.4095	3.5022	0.3612	0.9594	1.5135	4.119	0.4165	0.1059	0.5843	1.3256	3.9174	0.3671	36.0155	3.5666	0.1407	0.1198	0.0368	0.2455	5.5784	2.4135	0.3096	2.5044	0.1326	5.3237	0.0543	0.1582	7.2915	4.1191	0.4177	0.1773	0.9676	0.5209	2.1777	8.8347	4.2365	4.2247
8271	TAG44:0-FA18:0	Triacylglycerol	TAG Ester	53534	DMS-MS	100009682			1.1467	0.9593	0.9745	0.903	0.5667	0.5882	0.9112	0.6224	0.8309	0.8259	1.1625	0.6495	0.8278	0.8738	1.2432	0.9233	0.9053	9.546	1.4316	0.6709	0.6772	0.5608	0.3441	1.1327	0.9331	0.9343	0.913	0.8705	1.6583	0.7388	0.6463	1.1302	0.9486	0.7671	1.2888	1.0799	0.9373	0.8865	5.1013	1.59	1.5009
8273	TAG44:1-FA12:0	Triacylglycerol	TAG Ester	54390	DMS-MS	100010538			1.1668	1.2321	0.3978	1.477	0.1911	0.2821	2.1815	0.1686	0.3324	0.4683	0.9323	0.2153	0.0357	0.1754	2.1909	0.8997	0.547	23.6104	0.513	0.0331	0.0496	0.0094	0.0515	1.9879	0.6696	0.0782	0.7402	0.0505	1.319	0.0197	0.0919	3.1274	1.481	0.1236	0.0541	0.377	0.1669	0.5862	16.3488	1.3018	1.0246
8275	TAG44:1-FA14:0	Triacylglycerol	TAG Ester	53694	DMS-MS	100009842			1.5721	1.4229	0.5016	1.4124	0.2703	0.2507	1.8857	0.1843	0.3724	0.5452	1.3058	0.1835	0.0454	0.2398	2.0929	1.5752	0.5248	21.3036	0.5982	0.0387	0.0623	0.0128	0.0773	1.7164	0.8781	0.0736	1.1703	0.0575	1.7214	0.0252	0.1076	2.4988	1.122	0.1495	0.0768	0.4744	0.2213	1.0014	14.3403	1.4527	1.431
8276	TAG44:1-FA14:1	Triacylglycerol	TAG Ester	54032	DMS-MS	100010180			0.4846	0.2177	0.1302	0.18	0.0787	0.0249	0.1042	0.0343	0.0851	0.1201	0.5007	0.0218	0.0293	0.0608	0.044	0.4691	0.0202	0.8563	0.147	0.0191	0.0192	0.0074	0.0235	0.275	0.2141	0.0223	0.3208	0.018	0.4469	0.0248	0.0336	0.5313	0.1348	0.0498	0.0361	0.1119	0.0662	0.3522	0.2011	0.2478	0.3416
8278	TAG44:1-FA16:0	Triacylglycerol	TAG Ester	53864	DMS-MS	100010012			2.7835	2.2808	0.8457	1.3152	0.4938	0.1619	0.9208	0.1926	0.7435	0.965	2.5619	0.1619	0.0994	0.3669	0.4843	1.9019	0.1354	27.4346	1.9039	0.0998	0.1019	0.0365	0.136	2.8675	1.38	0.1224	1.7531	0.119	2.3086	0.0398	0.1224	3.7994	1.7194	0.3084	0.1466	0.8351	0.4777	1.4698	3.3417	2.071	2.2626
8279	TAG44:1-FA16:1	Triacylglycerol	TAG Ester	54571	DMS-MS	100010719			0.9998	0.4109	0.2405	0.5913	0.18	0.1152	0.5326	0.0774	0.1586	0.3553	0.6189	0.1052	0.0329	0.1276	0.1789	0.8901	0.1016	7.1699	0.2738	0.0331	0.0465	0.0169	0.0515	1.1771	0.3613	0.0428	0.6291	0.0444	0.547	0.0297	0.0685	2.4955	0.6918	0.1226	0.0746	0.1786	0.1505	0.5329	2.1034	0.6049	0.6214
8281	TAG44:1-FA18:1	Triacylglycerol	TAG Ester	53695	DMS-MS	100009843			1.8626	3.1711	0.8822	1.7592	0.3388	0.3361	2.3651	0.3301	0.7782	0.8971	1.8373	0.2186	0.1259	0.4045	2.6932	1.1199	0.7042	35.1465	1.9933	0.1194	0.114	0.0496	0.1398	2.6133	1.4249	0.1747	1.3954	0.1613	3.1146	0.0546	0.1506	1.9893	1.6907	0.2267	0.1638	1.0406	0.4811	0.9675	17.8101	2.7427	2.5939
8283	TAG44:2-FA12:0	Triacylglycerol	TAG Ester	53535	DMS-MS	100009683			0.3407	0.4014	0.1696	0.5489	0.0748	0.0949	0.6701	0.0924	0.2155	0.1801	0.2853	0.0775	0.0146	0.0875	0.7402	0.293	0.2637	7.0607	0.2093	0.0199	0.0282	0.0051	0.0251	0.6436	0.2893	0.0308	0.3634	0.0262	0.3788	0.009	0.0309	0.7449	0.482	0.047	0.0248	0.1598	0.0504	0.2001	8.6486	0.4934	0.3446
8285	TAG44:2-FA14:0	Triacylglycerol	TAG Ester	54224	DMS-MS	100010372			0.327	0.3546	0.1636	0.4755	0.087	0.0913	0.5648	0.0947	0.2232	0.169	0.275	0.0811	0.0385	0.0843	0.7535	0.3322	0.274	6.8597	0.2298	0.0281	0.0321	0.0118	0.0286	0.5825	0.2731	0.0415	0.3715	0.0464	0.3125	0.0261	0.0379	0.551	0.4394	0.0527	0.0297	0.1687	0.0637	0.2358	7.3494	0.4397	0.3578
8287	TAG44:2-FA16:0	Triacylglycerol	TAG Ester	53353	DMS-MS	100009501			0.9525	0.6489	0.3552	0.3512	0.2635	0.038	0.1621	0.0977	0.444	0.3681	0.8685	0.0417	0.0498	0.1708	0.1701	0.7107	0.0593	10.2462	0.7773	0.0574	0.0595	0.0208	0.0607	1.0758	0.5925	0.0487	0.9165	0.0566	0.5778	0.0229	0.0447	0.6265	0.5415	0.1509	0.0687	0.3685	0.1822	0.5622	0.8796	0.6642	0.7332
8288	TAG44:2-FA16:1	Triacylglycerol	TAG Ester	54033	DMS-MS	100010181			0.4317	0.3022	0.1079	0.2202	0.0734	0.0308	0.1259	0.0359	0.0908	0.1579	0.2299	0.0328	0.0172	0.0672	0.0682	0.2602	0.036	3.2413	0.1337	0.02	0.0217	0.0081	0.0248	0.4663	0.1544	0.0198	0.2855	0.0203	0.2536	0.0126	0.0347	0.6987	0.1705	0.0508	0.0448	0.1035	0.0978	0.2256	0.7133	0.2592	0.308
8289	TAG44:2-FA18:1	Triacylglycerol	TAG Ester	54225	DMS-MS	100010373			0.6779	0.9366	0.2327	0.3317	0.1201	0.0367	0.198	0.0922	0.2121	0.2651	0.406	0.031	0.0399	0.1099	0.2381	0.3091	0.0714	6.5191	0.5338	0.0588	0.0405	0.0113	0.0444	0.6929	0.3242	0.0465	0.4135	0.0453	0.7689	0.0203	0.0417	0.4143	0.2881	0.0649	0.0547	0.6187	0.2516	0.3015	1.4827	0.6405	0.659
8290	TAG44:2-FA18:2	Triacylglycerol	TAG Ester	54226	DMS-MS	100010374			0.7775	0.8262	0.4329	0.7563	0.2278	0.126	0.7361	0.1822	0.6087	0.4646	0.7851	0.1038	0.0477	0.2141	0.9809	0.5988	0.3713	14.8889	0.8667	0.0515	0.0664	0.0187	0.0755	1.3301	0.7497	0.0683	1.0912	0.071	0.7574	0.0224	0.0565	0.8078	0.8337	0.1411	0.0578	0.4937	0.1735	0.5294	10.192	1.023	0.9912
8296	TAG44:3-FA18:2	Triacylglycerol	TAG Ester	54391	DMS-MS	100010539			0.2775	0.2316	0.1043	0.1316	0.0833	0.0189	0.0658	0.0533	0.1604	0.1374	0.1566	0.0184	0.0216	0.0637	0.0957	0.1677	0.041	2.7147	0.2414	0.0347	0.0268	0.0097	0.0217	0.3381	0.1649	0.0228	0.3222	0.0276	0.2183	0.0102	0.0193	0.1656	0.1367	0.0435	0.0283	0.2749	0.1237	0.1614	0.8477	0.2392	0.2569
8307	TAG45:0-FA14:0	Triacylglycerol	TAG Ester	54392	DMS-MS	100010540			0.3262	0.2403	0.1554	0.2006	0.0787	0.0196	0.0911	0.0387	0.1488	0.1524	0.4769	0.018	0.0143	0.0833	0.0409	0.5658	0.0126	0.5034	0.2213	0.0137	0.017	0.0074	0.0325	0.2128	0.3452	0.015	0.4572	0.0192	0.7599	0.0085	0.0278	0.3781	0.0867	0.0471	0.0143	0.1213	0.0454	0.3082	0.1573	0.389	0.5902
8308	TAG45:0-FA15:0	Triacylglycerol	TAG Ester	53865	DMS-MS	100010013			0.3065	0.2513	0.1381	0.1812	0.0801	0.0179	0.086	0.0323	0.1566	0.1594	0.4465	0.0153	0.0135	0.0746	0.0375	0.5536	0.0149	0.4346	0.2176	0.014	0.014	0.008	0.0324	0.1919	0.3082	0.0138	0.4392	0.0184	0.6743	0.0114	0.0242	0.3608	0.0915	0.0474	0.0146	0.1148	0.0478	0.2844	0.1364	0.3793	0.5618
8309	TAG45:0-FA16:0	Triacylglycerol	TAG Ester	54572	DMS-MS	100010720			0.4894	0.3442	0.2172	0.2652	0.1153	0.0309	0.1401	0.0572	0.2269	0.237	0.6897	0.0272	0.0269	0.1166	0.0737	0.7438	0.0282	0.9137	0.4014	0.0246	0.0256	0.0142	0.0456	0.3639	0.4392	0.0263	0.6132	0.0325	0.9391	0.0161	0.0371	0.5851	0.1657	0.0771	0.0282	0.1694	0.0748	0.4175	0.2169	0.5615	0.799
8316	TAG45:1-FA15:0	Triacylglycerol	TAG Ester	53536	DMS-MS	100009684			0.1809	0.2123	0.0814	0.1553	0.0476	0.0205	0.1206	0.0249	0.1003	0.0996	0.224	0.0137	0.0127	0.0414	0.0686	0.2477	0.0319	0.493	0.0955	0.0102	0.0106	0.0043	0.0165	0.1692	0.15	0.0176	0.2467	0.0177	0.2671	0.0102	0.0197	0.2755	0.0747	0.0293	0.0129	0.0789	0.0414	0.1506	0.426	0.2011	0.2568
8317	TAG45:1-FA16:0	Triacylglycerol	TAG Ester	54573	DMS-MS	100010721			0.2846	0.1783	0.0966	0.1271	0.0828	0.0235	0.0804	0.0359	0.1102	0.1513	0.3052	0.0216	0.0254	0.0549	0.0603	0.3116	0.0253	0.8021	0.1757	0.0256	0.021	0.011	0.021	0.2254	0.1661	0.0246	0.299	0.0277	0.2463	0.0155	0.0321	0.328	0.1026	0.0562	0.0236	0.0944	0.0638	0.223	0.2393	0.2013	0.2657
8320	TAG45:1-FA18:1	Triacylglycerol	TAG Ester	53537	DMS-MS	100009685			0.2079	0.3725	0.113	0.1943	0.0508	0.0273	0.1438	0.0411	0.1372	0.1161	0.2522	0.0211	0.0203	0.0567	0.0838	0.1938	0.0408	0.7444	0.1873	0.0172	0.0188	0.008	0.0193	0.232	0.196	0.0295	0.2356	0.026	0.3816	0.0106	0.0287	0.2103	0.0933	0.0368	0.017	0.1475	0.061	0.1491	0.5489	0.2837	0.3509
8334	TAG46:0-FA12:0	Triacylglycerol	TAG Ester	53538	DMS-MS	100009686			0.6356	0.5529	0.2416	0.647	0.1115	0.128	0.8154	0.0974	0.2563	0.3492	0.6353	0.0983	0.043	0.1176	0.5872	0.4812	0.1951	7.687	0.5619	0.0375	0.0345	0.0107	0.04	1.4898	0.4565	0.0955	0.4585	0.0633	0.9152	0.0248	0.0523	1.337	0.9275	0.0883	0.0307	0.2364	0.1221	0.3533	5.6201	0.9215	0.7728
8336	TAG46:0-FA14:0	Triacylglycerol	TAG Ester	54393	DMS-MS	100010541			8.505	3.0599	1.8976	2.308	1.525	0.3118	1.6855	0.4104	1.3011	2.7504	5.3922	0.3495	0.1859	0.9005	0.9084	10.4289	0.2185	13.381	4.4129	0.2071	0.2631	0.0874	0.357	5.6763	3.2856	0.3613	5.3322	0.3031	6.0916	0.1589	0.3663	8.5792	3.1959	1.0744	0.5295	1.546	0.9619	5.2639	4.9238	4.2463	5.5624
8338	TAG46:0-FA16:0	Triacylglycerol	TAG Ester	53354	DMS-MS	100009502			18.7093	6.2641	3.8933	4.8577	3.2119	0.6581	3.9559	0.8057	2.7861	5.9447	11.6833	0.7382	0.3848	1.7597	2.1887	22.4643	0.4909	32.3242	10.521	0.4467	0.5211	0.1741	0.7141	12.6365	6.6001	0.7772	11.0063	0.6406	11.3392	0.2804	0.6661	18.9924	7.2275	2.2317	1.0949	3.1597	1.9958	11.0865	10.1692	8.6693	11.3752
8340	TAG46:0-FA18:0	Triacylglycerol	TAG Ester	53539	DMS-MS	100009687			0.8339	0.7013	0.3486	0.6559	0.1439	0.1043	0.6781	0.1118	0.3304	0.3815	0.8602	0.0802	0.0422	0.1909	0.4259	0.6533	0.1624	8.5231	0.7237	0.0399	0.0432	0.0155	0.0623	1.5591	0.7147	0.0787	0.6329	0.0633	1.7011	0.0298	0.0561	1.1225	0.7629	0.1079	0.0492	0.3238	0.1523	0.4546	5.74	1.5586	1.4354
8342	TAG46:1-FA12:0	Triacylglycerol	TAG Ester	53866	DMS-MS	100010014			4.0936	3.8777	1.2417	4.3212	0.7815	0.8376	5.7638	0.4525	1.2979	2.1062	2.8827	0.7043	0.1997	0.5692	4.3437	3.3668	1.4128	33.9094	3.0123	0.2898	0.2496	0.06	0.2184	7.4182	2.0045	0.728	2.749	0.3961	2.6216	0.1241	0.3958	8.3529	5.6323	0.5871	0.223	1.365	0.8117	2.1218	27.0624	3.8306	2.7289
8344	TAG46:1-FA14:0	Triacylglycerol	TAG Ester	53696	DMS-MS	100009844			9.7808	5.9454	2.303	4.0767	1.7039	0.5465	2.7282	0.6741	1.5607	3.475	4.1128	0.5523	0.1788	1.1479	1.6541	11.1952	0.7343	16.8164	2.7122	0.2183	0.4589	0.0842	0.3781	7.6133	3.6867	0.4477	7.497	0.3771	4.7473	0.1809	0.7649	10.5536	2.7967	1.1172	0.7322	2.4313	1.5443	6.2748	13.1379	4.1942	5.5809
8345	TAG46:1-FA14:1	Triacylglycerol	TAG Ester	54227	DMS-MS	100010375			1.6584	0.6029	0.5397	0.5559	0.651	0.2491	0.3816	0.3899	0.4243	0.6089	1.2973	0.3271	0.3155	0.4239	0.3404	1.4841	0.2183	1.9629	0.8291	0.2073	0.286	0.2202	0.2352	1.082	0.7542	0.283	1.7063	0.3505	0.9991	0.5975	0.2447	2.1722	0.7336	0.7217	0.3477	0.5829	0.415	1.4499	0.8627	0.7147	1.0206
8347	TAG46:1-FA16:0	Triacylglycerol	TAG Ester	53355	DMS-MS	100009503			13.6753	6.1083	2.6226	6.3389	2.2259	1.1594	7.1456	0.8186	2.2925	4.9659	7.1373	1.0312	0.3336	1.2151	5.5563	11.7765	1.6541	48.7808	5.2934	0.4289	0.5012	0.1446	0.4876	13.9099	3.9789	1.0455	8.235	0.6238	4.7654	0.254	0.7816	19.8372	7.7698	1.5676	0.7935	2.5378	1.9504	7.0018	31.0358	6.3351	6.3025
8348	TAG46:1-FA16:1	Triacylglycerol	TAG Ester	53540	DMS-MS	100009688			5.8454	1.319	0.8387	1.3468	0.975	0.2013	0.7141	0.2424	0.5528	1.9848	1.9902	0.2387	0.0837	0.487	0.4123	5.8866	0.1532	7.6627	1.0321	0.1058	0.1837	0.0615	0.1837	4.2402	1.2204	0.1697	3.6283	0.1621	1.2071	0.1113	0.3149	7.4176	1.3882	0.6857	0.471	0.7452	0.829	3.2811	2.1869	1.3447	2.317
8350	TAG46:1-FA18:0	Triacylglycerol	TAG Ester	54034	DMS-MS	100010182			0.4401	0.5196	0.1528	0.2142	0.0617	0.0302	0.111	0.046	0.1675	0.1554	0.3276	0.0244	0.0303	0.0847	0.1121	0.1925	0.0449	3.0512	0.3515	0.0239	0.0247	0.0086	0.0276	0.4565	0.2585	0.0244	0.2809	0.0367	0.6534	0.0099	0.0277	0.3868	0.173	0.0462	0.0307	0.2459	0.1023	0.1886	0.8444	0.6581	0.5837
8351	TAG46:1-FA18:1	Triacylglycerol	TAG Ester	54394	DMS-MS	100010542			7.6883	8.3035	2.658	6.6243	1.5428	1.3092	7.8995	1.0537	2.3527	3.87	4.9845	1.043	0.3634	1.2903	6.0607	7.1796	2.2349	41.795	4.8463	0.4878	0.58	0.1713	0.4902	10.8549	4.3806	1.2064	5.9102	0.6852	6.2269	0.4366	0.8539	11.0515	6.8759	1.1832	0.5386	3.0627	1.6455	4.8778	37.5127	7.3799	5.98
8355	TAG46:2-FA12:0	Triacylglycerol	TAG Ester	54035	DMS-MS	100010183			2.5229	1.7248	0.7757	2.6475	0.6383	0.5006	2.497	0.3742	1.201	1.4608	1.4278	0.4848	0.1273	0.4476	2.127	2.094	1.1427	19.4832	1.6339	0.2157	0.2292	0.0503	0.1737	4.9537	1.4464	0.4119	2.0255	0.2726	1.0474	0.0911	0.2898	4.6569	3.1167	0.4466	0.1706	0.851	0.4649	1.3954	23.122	2.2907	1.3586
8357	TAG46:2-FA14:0	Triacylglycerol	TAG Ester	54036	DMS-MS	100010184			3.2861	2.1036	0.9235	1.8457	0.7809	0.2084	0.9277	0.3605	0.9473	1.0807	1.4096	0.2466	0.0858	0.5956	0.6278	4.0875	0.4301	5.6428	1.2254	0.1343	0.2813	0.0432	0.1989	3.1089	1.8649	0.2034	3.1296	0.1804	1.458	0.0808	0.3384	2.9506	0.9814	0.4784	0.2919	1.1888	0.5518	2.5245	7.4038	1.7135	1.9243
8358	TAG46:2-FA14:1	Triacylglycerol	TAG Ester	54574	DMS-MS	100010722			1.4417	0.76	0.2834	0.4977	0.2273	0.0449	0.1854	0.0915	0.202	0.3972	0.6549	0.0625	0.0425	0.1811	0.1184	1.039	0.0418	1.7127	0.3348	0.0493	0.0617	0.0256	0.0666	1.0073	0.4206	0.0527	0.9916	0.0583	0.5861	0.0422	0.1133	1.5254	0.2385	0.1523	0.1322	0.3143	0.312	0.9437	0.5376	0.4778	0.708
8360	TAG46:2-FA16:0	Triacylglycerol	TAG Ester	53356	DMS-MS	100009504			3.4869	1.582	0.8759	2.2855	0.8119	0.4211	2.1187	0.3656	1.3763	1.6793	1.9379	0.4515	0.1109	0.4784	2.0016	3.0137	0.9076	19.4087	1.8576	0.2208	0.2189	0.0718	0.2154	5.0293	1.5366	0.4006	2.6067	0.2586	1.081	0.0941	0.2501	4.9999	3.1355	0.5537	0.2395	0.8872	0.5686	1.9914	18.6978	2.0695	1.7043
8361	TAG46:2-FA16:1	Triacylglycerol	TAG Ester	53867	DMS-MS	100010015			2.9852	1.1693	0.4765	1.4037	0.4429	0.2397	0.854	0.2031	0.335	1.041	0.9519	0.2213	0.0651	0.37	0.5907	2.084	0.4105	6.6429	0.6425	0.1251	0.141	0.0359	0.1476	2.8944	0.7203	0.1575	1.966	0.1313	0.6741	0.0719	0.2785	4.6467	0.9093	0.3263	0.343	0.4736	0.6687	1.5663	6.4764	1.1705	1.3398
8363	TAG46:2-FA18:1	Triacylglycerol	TAG Ester	54037	DMS-MS	100010185			2.8542	4.9845	0.9939	1.9914	0.5028	0.2834	1.2084	0.3676	0.8956	1.2572	1.4969	0.2263	0.1415	0.5178	1.2714	1.6937	0.5778	12.1231	1.8526	0.2336	0.2082	0.0589	0.2163	3.3527	1.3907	0.2981	2.1023	0.2464	2.5297	0.0937	0.3213	3.1051	1.29	0.3462	0.2706	2.0925	0.8627	1.6351	9.4638	2.497	2.4144
8364	TAG46:2-FA18:2	Triacylglycerol	TAG Ester	53868	DMS-MS	100010016			3.2067	2.27	1.1953	2.8513	0.9766	0.5157	2.554	0.5431	1.8097	1.8575	1.9209	0.5158	0.1199	0.698	2.3332	3.8095	1.274	19.1773	2.2381	0.2276	0.3367	0.0593	0.2359	5.5914	2.347	0.4884	3.3479	0.312	1.5731	0.0835	0.3407	4.3573	3.2074	0.604	0.2241	1.46	0.4899	2.3954	24.2498	2.8577	2.1454
8367	TAG46:3-FA12:0	Triacylglycerol	TAG Ester	54038	DMS-MS	100010186			0.477	0.3296	0.1335	0.4854	0.1086	0.0937	0.3336	0.0778	0.2485	0.2663	0.2191	0.0928	0.0198	0.1191	0.2846	0.4276	0.3319	3.058	0.2986	0.0536	0.0519	0.0112	0.0425	0.8179	0.2962	0.06	0.4708	0.0462	0.1993	0.0167	0.0653	0.9076	0.4176	0.084	0.0499	0.1466	0.0774	0.2617	4.5466	0.433	0.255
8369	TAG46:3-FA14:0	Triacylglycerol	TAG Ester	54395	DMS-MS	100010543			0.4996	0.363	0.1517	0.2815	0.114	0.0333	0.1171	0.0672	0.1818	0.1557	0.239	0.0399	0.0233	0.112	0.0749	0.6925	0.0893	0.7292	0.2074	0.0324	0.0445	0.0098	0.032	0.3779	0.3102	0.0353	0.5705	0.031	0.257	0.0202	0.0544	0.3867	0.1462	0.0705	0.0546	0.1976	0.0789	0.454	0.7755	0.2765	0.2681
8370	TAG46:3-FA14:1	Triacylglycerol	TAG Ester	53357	DMS-MS	100009505			0.335	0.2163	0.0971	0.1736	0.0817	0.0208	0.0602	0.0441	0.1043	0.0874	0.1772	0.0282	0.0205	0.0787	0.0417	0.2866	0.0268	0.3844	0.1273	0.0264	0.0309	0.0112	0.0268	0.2726	0.1745	0.0243	0.2988	0.026	0.1783	0.0155	0.0415	0.2797	0.0778	0.0557	0.0481	0.1232	0.0807	0.2699	0.2641	0.1738	0.1985
8372	TAG46:3-FA16:0	Triacylglycerol	TAG Ester	54396	DMS-MS	100010544			0.4738	0.2386	0.1256	0.2405	0.1323	0.0428	0.1541	0.0546	0.2511	0.2151	0.2683	0.0624	0.0221	0.0933	0.1512	0.5597	0.1732	1.9674	0.3025	0.0536	0.0354	0.0218	0.05	0.4874	0.2132	0.0498	0.4699	0.0479	0.1492	0.0294	0.035	0.525	0.2883	0.0965	0.0523	0.1258	0.0644	0.2979	1.0772	0.22	0.2213
8373	TAG46:3-FA16:1	Triacylglycerol	TAG Ester	54397	DMS-MS	100010545			0.542	0.2642	0.1263	0.4391	0.1222	0.0745	0.2376	0.0869	0.1496	0.2401	0.1813	0.0808	0.026	0.1188	0.2022	0.3623	0.2	2.0395	0.2245	0.0507	0.0559	0.015	0.0454	0.7599	0.2342	0.0535	0.4222	0.0507	0.1575	0.0254	0.0725	0.8488	0.2965	0.0951	0.0827	0.1463	0.1234	0.297	3.4669	0.3515	0.2699
8374	TAG46:3-FA18:1	Triacylglycerol	TAG Ester	54575	DMS-MS	100010723			0.5257	1.0071	0.2509	0.3275	0.1851	0.0494	0.1239	0.1379	0.4231	0.3524	0.2893	0.0436	0.075	0.1506	0.3177	0.2793	0.1335	3.2461	0.5747	0.0913	0.0885	0.0249	0.063	0.7344	0.3668	0.0742	0.6905	0.0869	0.5193	0.0375	0.0666	0.3391	0.295	0.1242	0.0822	0.8512	0.1932	0.3663	1.3449	0.5156	0.5589
8375	TAG46:3-FA18:2	Triacylglycerol	TAG Ester	54576	DMS-MS	100010724			1.1595	1.1693	0.3849	0.8304	0.3148	0.1175	0.3902	0.2151	0.6261	0.5436	0.5309	0.116	0.0619	0.2992	0.4796	0.833	0.308	4.9346	0.8068	0.1177	0.1417	0.0291	0.1118	1.5928	0.7566	0.1154	1.298	0.1214	0.7187	0.0399	0.1422	1.2029	0.6016	0.1953	0.1186	0.8971	0.2453	0.7664	5.6824	0.9313	0.842
8376	TAG46:3-FA18:3	Triacylglycerol	TAG Ester	54039	DMS-MS	100010187			0.4016	0.3484	0.1413	0.3029	0.0701	0.0601	0.2218	0.0566	0.2906	0.2272	0.2641	0.063	0.0204	0.0899	0.1673	0.6331	0.2745	1.9454	0.2524	0.0391	0.032	0.0087	0.0241	0.4053	0.2735	0.0437	0.5677	0.0261	0.2028	0.0163	0.0312	0.5263	0.3378	0.0678	0.0461	0.154	0.0702	0.3467	1.7013	0.2928	0.2266
8383	TAG46:4-FA18:2	Triacylglycerol	TAG Ester	53869	DMS-MS	100010017			0.1888	0.2064	0.0948	0.1225	0.1097	0.0211	0.0368	0.071	0.318	0.18	0.1059	0.024	0.0322	0.0788	0.108	0.1401	0.0565	1.2149	0.2428	0.0432	0.0548	0.0122	0.0294	0.3188	0.1876	0.0286	0.7414	0.0399	0.1491	0.0148	0.0268	0.1283	0.1145	0.0643	0.0331	0.3665	0.0802	0.1912	0.6499	0.1782	0.183
8401	TAG47:0-FA14:0	Triacylglycerol	TAG Ester	54228	DMS-MS	100010376			0.4	0.2905	0.1629	0.2217	0.1011	0.021	0.0845	0.047	0.2189	0.1895	0.446	0.0226	0.0206	0.0897	0.0468	0.6715	0.0203	0.5913	0.2212	0.0171	0.0245	0.009	0.0336	0.3079	0.3448	0.0204	0.6132	0.0348	0.6775	0.0123	0.0439	0.4148	0.1406	0.0622	0.0233	0.1618	0.0838	0.4201	0.1815	0.3927	0.5815
8402	TAG47:0-FA15:0	Triacylglycerol	TAG Ester	54229	DMS-MS	100010377			0.9351	0.5226	0.3245	0.3726	0.2224	0.0573	0.1326	0.084	0.413	0.5536	0.9273	0.0395	0.0515	0.1679	0.1059	1.4673	0.0381	0.7914	0.7366	0.0485	0.0537	0.0463	0.0868	0.6386	0.6161	0.0857	1.1982	0.1329	1.0728	0.0412	0.0817	0.9757	0.2211	0.193	0.0685	0.2821	0.2061	0.8339	0.1363	0.6893	1.1605
8403	TAG47:0-FA16:0	Triacylglycerol	TAG Ester	53697	DMS-MS	100009845			2.1747	1.0145	0.6833	0.8147	0.4862	0.0793	0.3086	0.1788	0.8189	1.1083	2.2518	0.0716	0.089	0.3474	0.2082	3.2398	0.0665	1.9646	1.6704	0.0908	0.1035	0.0772	0.1759	1.3969	1.3391	0.1516	2.7158	0.2527	2.2483	0.0577	0.161	2.2635	0.4711	0.4161	0.0943	0.6072	0.4225	1.9039	0.3094	1.4337	2.4671
8404	TAG47:0-FA17:0	Triacylglycerol	TAG Ester	53870	DMS-MS	100010018			0.4146	0.2435	0.1741	0.2217	0.1069	0.0468	0.0968	0.0726	0.2518	0.2133	0.4419	0.038	0.0406	0.0998	0.0793	0.6808	0.0389	0.6488	0.2712	0.0412	0.0344	0.0268	0.0351	0.3066	0.2979	0.0471	0.5681	0.0658	0.5308	0.0407	0.0459	0.4276	0.1809	0.0724	0.0796	0.1685	0.1058	0.4309	0.2381	0.3308	0.5055
8409	TAG47:1-FA14:0	Triacylglycerol	TAG Ester	53871	DMS-MS	100010019			0.9505	0.8882	0.3445	0.5331	0.2247	0.0618	0.2164	0.1235	0.392	0.5283	0.703	0.0542	0.0411	0.1893	0.1234	1.4524	0.0675	0.8539	0.4538	0.0389	0.065	0.023	0.0739	0.8278	0.6467	0.087	1.3864	0.0968	0.8409	0.0305	0.1346	0.8948	0.2128	0.159	0.0551	0.4184	0.2548	0.9696	0.5659	0.6158	0.9814
8411	TAG47:1-FA15:0	Triacylglycerol	TAG Ester	53358	DMS-MS	100009506			1.1564	0.9055	0.3504	0.5082	0.2513	0.0625	0.2	0.1298	0.4553	0.6561	0.7479	0.057	0.044	0.1919	0.1186	1.6776	0.0615	0.8284	0.4932	0.0509	0.0688	0.0343	0.0908	0.8328	0.6524	0.1054	1.5812	0.1126	0.7802	0.0385	0.152	1.2244	0.2072	0.1969	0.0603	0.3922	0.307	1.0153	0.4546	0.6251	1.0812
8412	TAG47:1-FA16:0	Triacylglycerol	TAG Ester	54398	DMS-MS	100010546			1.4582	0.6261	0.3265	0.4256	0.3356	0.062	0.1914	0.1128	0.4253	0.7014	0.9141	0.0587	0.0574	0.2062	0.1839	1.7282	0.0655	1.3203	0.5747	0.0589	0.0703	0.0426	0.0855	1.0122	0.5554	0.0855	1.6276	0.1234	0.6537	0.0468	0.1264	1.5558	0.2857	0.2451	0.0843	0.3648	0.3254	1.2311	0.4083	0.5286	1.0222
8413	TAG47:1-FA16:1	Triacylglycerol	TAG Ester	54577	DMS-MS	100010725			0.7225	0.2537	0.2369	0.2302	0.173	0.0712	0.1188	0.0985	0.1946	0.4342	0.4646	0.0581	0.0697	0.1451	0.1306	0.91	0.0575	0.6502	0.2576	0.0786	0.0739	0.0481	0.0778	0.5478	0.2735	0.0912	0.937	0.0901	0.2984	0.0715	0.1115	0.9047	0.1833	0.1712	0.1145	0.187	0.2158	0.5808	0.1495	0.2665	0.5787
8414	TAG47:1-FA17:0	Triacylglycerol	TAG Ester	53872	DMS-MS	100010020			0.2392	0.2058	0.0894	0.1802	0.0642	0.0385	0.1167	0.0448	0.147	0.1187	0.2351	0.0282	0.0264	0.0597	0.1025	0.2891	0.0462	0.6819	0.1319	0.0223	0.0226	0.0096	0.018	0.2397	0.1557	0.0304	0.3192	0.0348	0.2096	0.0191	0.0356	0.3227	0.131	0.0419	0.0315	0.1029	0.0709	0.2279	0.5424	0.1864	0.229
8416	TAG47:1-FA18:1	Triacylglycerol	TAG Ester	54578	DMS-MS	100010726			1.0124	1.3184	0.4373	0.6695	0.2386	0.0874	0.3142	0.1603	0.5029	0.6455	0.8086	0.0641	0.0549	0.2242	0.2042	1.4417	0.1267	1.1077	0.6503	0.0649	0.087	0.0313	0.0978	0.9107	0.797	0.1395	1.4486	0.1242	1.0954	0.0406	0.1738	0.879	0.2561	0.1839	0.0532	0.543	0.3031	1.0001	1.0765	0.8419	1.2289
8420	TAG47:2-FA14:0	Triacylglycerol	TAG Ester	53541	DMS-MS	100009689			0.3812	0.2591	0.1363	0.221	0.1197	0.0317	0.0785	0.066	0.2021	0.1869	0.2155	0.0306	0.0215	0.0939	0.0528	0.5997	0.0369	0.2829	0.2178	0.0246	0.042	0.0121	0.0395	0.3634	0.2888	0.0426	0.5987	0.0429	0.2142	0.016	0.0624	0.325	0.0846	0.0777	0.0328	0.1849	0.0973	0.3999	0.3083	0.2368	0.3305
8422	TAG47:2-FA15:0	Triacylglycerol	TAG Ester	54230	DMS-MS	100010378			0.4326	0.3065	0.1566	0.233	0.1242	0.0338	0.0726	0.0725	0.2401	0.2094	0.2732	0.0307	0.0204	0.1001	0.0542	0.6787	0.0398	0.2771	0.2295	0.0312	0.0436	0.0173	0.0472	0.3528	0.3185	0.0521	0.6784	0.0542	0.2482	0.0206	0.0749	0.4114	0.0817	0.0851	0.0299	0.2003	0.113	0.427	0.2785	0.2542	0.3788
8424	TAG47:2-FA16:1	Triacylglycerol	TAG Ester	54579	DMS-MS	100010727			0.3539	0.1201	0.0708	0.113	0.0695	0.0229	0.0332	0.0391	0.0741	0.1538	0.1268	0.0243	0.0162	0.0626	0.042	0.3244	0.025	0.2735	0.1045	0.029	0.0254	0.0128	0.0336	0.2752	0.1006	0.0245	0.3902	0.0277	0.0933	0.0231	0.0554	0.4499	0.055	0.0566	0.0462	0.0716	0.1278	0.2552	0.0997	0.1048	0.2244
8426	TAG47:2-FA18:1	Triacylglycerol	TAG Ester	53698	DMS-MS	100009846			0.3698	0.4924	0.1337	0.2312	0.1024	0.0359	0.1201	0.0699	0.1686	0.2129	0.2313	0.0295	0.0317	0.0918	0.142	0.3429	0.0762	0.5753	0.2155	0.0471	0.0456	0.0176	0.0352	0.3329	0.2095	0.0541	0.4199	0.0616	0.2908	0.0237	0.0695	0.3144	0.1081	0.0746	0.0418	0.2343	0.1454	0.3115	0.6644	0.2659	0.339
8427	TAG47:2-FA18:2	Triacylglycerol	TAG Ester	54580	DMS-MS	100010728			0.4475	0.3568	0.1926	0.2953	0.1731	0.0459	0.1195	0.094	0.3649	0.2539	0.3346	0.0365	0.03	0.1338	0.0994	0.7631	0.0856	0.4881	0.334	0.0327	0.0628	0.0186	0.0543	0.482	0.4432	0.0686	0.7784	0.0694	0.2953	0.025	0.0787	0.3736	0.128	0.121	0.0343	0.2624	0.0992	0.4818	0.6927	0.3258	0.4248
8451	TAG48:0-FA14:0	Triacylglycerol	TAG Ester	54399	DMS-MS	100010547			5.8051	2.8812	1.3949	1.9318	1.1011	0.2698	0.994	0.4322	1.2049	2.2446	3.127	0.252	0.2218	0.732	0.7869	6.4483	0.3043	8.1894	2.6351	0.2294	0.3111	0.0982	0.2798	4.4538	2.3106	0.4707	4.4668	0.487	3.3744	0.1707	0.4304	4.7246	2.0635	0.7893	0.4789	1.443	1.0455	4.0467	3.9313	3.0852	3.9773
8453	TAG48:0-FA16:0	Triacylglycerol	TAG Ester	54581	DMS-MS	100010729			58.2303	13.4412	8.8685	9.6904	10.1884	1.5864	5.5948	2.2853	7.9135	21.168	24.7189	1.7457	1.6408	4.3966	5.7301	57.0118	1.3108	50.8605	38.8869	4.9907	2.1338	2.1838	2.611	37.2754	14.0188	6.3745	31.4824	6.7536	18.3253	1.874	2.6494	49.3853	16.5581	9.6616	5.1481	8.2529	12.06	33.83	9.0925	16.6176	26.502
8455	TAG48:0-FA18:0	Triacylglycerol	TAG Ester	54400	DMS-MS	100010548			4.6328	2.1413	1.2325	1.6661	0.8451	0.2035	0.8566	0.3206	1.1368	1.6923	3.1449	0.1734	0.2057	0.6171	0.7088	4.9973	0.2597	9.9404	2.3617	0.1516	0.2261	0.0666	0.223	3.9118	2.28	0.2775	3.4824	0.3594	3.6242	0.1383	0.2591	3.5825	1.8934	0.5606	0.3687	1.2247	0.7984	3.2174	7.755	3.3983	3.8936
8458	TAG48:1-FA12:0	Triacylglycerol	TAG Ester	53542	DMS-MS	100009690			0.8347	1.2356	0.2935	1.0239	0.1382	0.1853	0.9452	0.1456	0.3938	0.4723	0.5103	0.1193	0.0569	0.1424	1.6063	0.4821	0.5707	7.8436	0.6942	0.0788	0.0862	0.0164	0.0581	1.8635	0.4742	0.2017	0.583	0.1522	0.7294	0.0288	0.1005	1.2016	0.9359	0.113	0.054	0.4513	0.2238	0.384	11.036	1.1536	0.7263
8460	TAG48:1-FA14:0	Triacylglycerol	TAG Ester	54040	DMS-MS	100010188			38.538	21.4413	8.473	12.7378	7.2845	2.1104	7.4991	3.4367	6.8767	16.8764	14.2181	2.1694	1.1215	4.4889	5.2482	44.0238	2.8562	37.6753	15.984	1.9953	2.4834	0.8732	2.0393	30.6172	12.0532	4.6024	29.5794	3.4652	11.2953	1.4592	3.7357	30.1208	11.481	5.6999	3.4302	10.1644	7.9885	26.3249	22.1796	13.5101	18.5087
8461	TAG48:1-FA14:1	Triacylglycerol	TAG Ester	54231	DMS-MS	100010379			0.9485	0.4259	0.2091	0.2627	0.1605	0.0296	0.0915	0.0768	0.1724	0.299	0.5825	0.0343	0.0501	0.1138	0.0886	0.722	0.024	1.1982	0.3249	0.0505	0.0527	0.0292	0.0537	0.6125	0.3059	0.057	0.701	0.085	0.408	0.0338	0.0734	0.7817	0.1778	0.1236	0.0878	0.2394	0.2328	0.7317	0.1688	0.3419	0.5159
8463	TAG48:1-FA16:0	Triacylglycerol	TAG Ester	53359	DMS-MS	100009507			82.0669	30.5398	13.6627	20.356	14.2622	3.5433	11.1012	5.2013	10.4975	32.0934	25.5127	3.7722	2.0381	7.5936	8.502	79.7358	3.6303	73.4109	24.7134	3.319	4.01	2.2917	4.0858	59.2001	18.6495	7.0893	55.0426	6.369	15.8695	2.8996	5.9626	73.5124	19.8471	11.9726	8.1117	15.116	15.357	49.6888	28.9387	20.4587	33.5077
8464	TAG48:1-FA16:1	Triacylglycerol	TAG Ester	53543	DMS-MS	100009691			19.7638	3.0232	1.9953	2.6355	3.0502	0.5926	1.0537	0.7685	1.4156	6.6863	4.3563	0.7193	0.3887	1.4065	1.3231	16.2947	0.3879	16.652	3.6165	0.6554	0.7009	0.6845	0.9882	13.1191	2.6248	1.073	11.0062	1.2875	2.2092	0.7193	1.1445	20.6891	3.2057	3.0279	2.3003	1.854	3.304	10.2389	1.8411	2.928	6.8535
8466	TAG48:1-FA18:0	Triacylglycerol	TAG Ester	53699	DMS-MS	100009847			2.1597	1.5918	0.5786	1.2643	0.3739	0.2155	0.963	0.2133	0.6324	0.8824	1.332	0.1482	0.1247	0.3137	1.5063	1.6349	0.5007	11.2063	1.0959	0.1187	0.1507	0.0385	0.1268	2.8012	0.9692	0.234	1.6733	0.2213	1.4053	0.0725	0.205	2.3658	1.1316	0.2739	0.1985	0.7346	0.5232	1.3867	9.7711	1.7857	1.6491
8467	TAG48:1-FA18:1	Triacylglycerol	TAG Ester	54401	DMS-MS	100010549			50.0466	31.0716	11.711	18.1647	8.7268	3.0353	10.956	4.6868	9.2224	23.3014	19.0613	2.9427	1.4562	5.845	8.81	56.1087	4.3256	51.0013	19.8403	2.5227	3.2452	1.1564	2.6491	42.6894	16.5125	6.4213	38.8893	4.7468	15.0601	1.9267	4.9397	36.9317	15.3923	7.0211	4.3664	13.8207	10.6561	35.8589	41.8776	18.8943	24.0241
8472	TAG48:2-FA12:0	Triacylglycerol	TAG Ester	54582	DMS-MS	100010730			2.8804	6.3397	1.0978	4.9488	0.5541	0.8846	4.1082	0.7257	1.2474	1.8892	1.2922	0.5621	0.1959	0.5751	9.1606	2.1012	3.3512	17.2501	2.3387	0.5119	0.4488	0.0735	0.2917	5.8339	1.7157	1.3341	2.4645	0.6635	1.8141	0.1401	0.6302	4.2436	3.9488	0.4534	0.261	2.099	1.0167	1.6431	46.2568	3.9854	1.8219
8474	TAG48:2-FA14:0	Triacylglycerol	TAG Ester	54583	DMS-MS	100010731			25.1209	9.9052	5.109	9.0384	6.0192	1.5898	3.599	2.6427	5.4625	9.421	7.0013	1.8007	0.6704	3.6527	3.1284	29.1886	2.4749	21.7337	10.3188	1.7619	2.3572	0.6969	1.8037	22.7816	8.8078	2.8954	21.0663	2.4821	4.5143	0.9451	2.9844	19.424	6.3704	4.6589	2.9695	6.887	5.0035	17.4236	19.0073	8.0009	10.3889
8475	TAG48:2-FA14:1	Triacylglycerol	TAG Ester	53700	DMS-MS	100009848			6.688	3.3764	1.307	2.0585	1.07	0.233	0.6916	0.5717	1.0655	2.2965	2.7421	0.2978	0.2639	0.7763	0.6235	4.6791	0.2015	5.3326	2.0315	0.4199	0.3597	0.2151	0.4351	4.3592	1.7941	0.5152	4.7158	0.5689	1.6628	0.288	0.6096	5.0122	1.0839	0.8333	0.6847	1.6787	1.8326	4.5867	1.4235	1.8387	2.9838
8477	TAG48:2-FA16:0	Triacylglycerol	TAG Ester	53360	DMS-MS	100009508			36.5967	11.9869	6.6858	10.1771	7.7708	1.7016	4.1703	3.0456	6.9818	12.371	10.995	2.0332	0.9593	4.3629	3.832	37.2582	2.1552	29.5461	12.5744	1.9592	2.6067	0.9931	2.2959	29.1072	11.1996	3.1735	27.6378	3.0276	5.8103	1.2543	3.1764	29.7595	7.8991	5.9664	3.9789	8.5588	6.4675	24.4672	19.2917	9.3274	13.5117
8478	TAG48:2-FA16:1	Triacylglycerol	TAG Ester	54402	DMS-MS	100010550			20.785	5.8098	2.5641	5.2821	3.1412	1.0749	1.6484	1.494	1.5478	7.2907	3.3055	1.27	0.4113	2.3191	1.7082	14.9665	1.1068	17.5708	4.4244	1.204	1.1639	0.5648	1.5982	17.0856	3.3713	1.3421	14.5749	1.3385	2.4295	0.94	2.3102	25.2843	2.8918	2.8539	3.7137	2.9502	5.7037	10.6449	6.918	4.1818	8.5788
8480	TAG48:2-FA18:0	Triacylglycerol	TAG Ester	53701	DMS-MS	100009849			0.4206	0.3632	0.1539	0.4339	0.1142	0.0869	0.305	0.0891	0.3454	0.3126	0.2547	0.0724	0.0384	0.1106	0.5838	0.3208	0.2708	4.4266	0.3495	0.0507	0.0628	0.0166	0.0456	0.928	0.2779	0.0845	0.4575	0.0861	0.2658	0.0205	0.0551	0.5337	0.4779	0.0874	0.0528	0.2449	0.1122	0.2867	5.6308	0.4838	0.3539
8481	TAG48:2-FA18:1	Triacylglycerol	TAG Ester	54584	DMS-MS	100010732			22.7835	22.2882	5.4149	15.4959	3.6446	2.5721	9.9868	3.0193	4.4707	10.1029	7.5009	2.0497	0.8266	3.3612	21.3141	17.6981	7.4221	43.9236	9.3056	2.0971	2.0288	0.5499	1.8158	23.9889	7.722	4.0038	18.1746	2.6114	7.4349	0.9622	3.4819	21.8302	10.2093	2.9125	2.8819	8.5237	7.2896	14.26	88.0274	13.2598	11.8109
8482	TAG48:2-FA18:2	Triacylglycerol	TAG Ester	54041	DMS-MS	100010189			22.8311	8.6294	5.188	8.2335	6.443	1.4877	3.6272	2.6206	6.6549	8.9899	7.6458	1.6848	0.6472	3.433	3.6832	30.8312	2.7712	21.7731	10.2122	1.4385	2.3601	0.6968	1.5617	21.5655	9.9795	2.953	19.9758	2.5488	4.4509	0.7568	2.2878	15.9184	7.043	4.5365	2.184	7.4507	3.2565	18.4518	26.3197	7.8459	8.8501
8487	TAG48:3-FA12:0	Triacylglycerol	TAG Ester	53370	DMS-MS	100009518			2.2261	3.2353	0.8295	3.8068	0.6698	0.6479	2.4832	0.8295	1.7067	1.7622	0.8605	0.493	0.1449	0.6733	6.2277	1.8575	3.6408	11.7752	2.0956	0.5683	0.6276	0.0797	0.2815	5.1663	1.8932	0.9783	2.3329	0.6502	1.3198	0.1008	0.5495	3.0361	3.5315	0.4974	0.2561	1.9942	0.5451	1.4207	52.3608	3.2236	1.2217
8489	TAG48:3-FA14:0	Triacylglycerol	TAG Ester	53551	DMS-MS	100009699			5.3688	1.912	0.9417	2.0481	1.2516	0.3923	0.6214	0.6987	1.151	1.8093	1.2064	0.4619	0.1217	1.0501	0.5838	6.4144	0.7879	4.0707	2.2079	0.526	0.6591	0.1474	0.5377	4.8067	2.0321	0.5507	5.0692	0.4785	0.9529	0.236	0.7918	4.4624	1.1769	1.0512	0.9127	1.4714	0.9286	3.8318	4.4487	1.7601	2.1751
8490	TAG48:3-FA14:1	Triacylglycerol	TAG Ester	53883	DMS-MS	100010031			3.5519	1.3541	0.6794	1.1388	0.7911	0.1582	0.3096	0.3907	0.7889	1.0026	1.2622	0.227	0.1631	0.5855	0.3314	2.7313	0.1674	2.5513	1.2826	0.3083	0.2955	0.1604	0.3399	2.6736	1.2614	0.2879	2.606	0.3345	0.7553	0.1701	0.3885	2.5072	0.574	0.5838	0.4819	0.9801	0.7434	2.4347	1.0615	0.9985	1.4419
8492	TAG48:3-FA16:0	Triacylglycerol	TAG Ester	53884	DMS-MS	100010032			6.1222	2.0966	1.077	1.8593	1.2014	0.2446	0.57	0.5443	1.4739	1.8489	2.261	0.3342	0.1799	0.8895	0.5697	6.7109	0.4057	4.3855	2.2215	0.4241	0.4448	0.1687	0.4536	4.1175	2.3415	0.4145	4.9981	0.452	1.1377	0.2239	0.5071	4.1531	1.2341	0.9575	0.6884	1.5498	0.8614	4.5513	2.4073	1.6196	2.1258
8493	TAG48:3-FA16:1	Triacylglycerol	TAG Ester	54408	DMS-MS	100010556			5.5508	1.8368	0.8946	2.1062	1.2325	0.4023	0.5309	0.7114	0.8507	1.8323	1.0177	0.5111	0.1425	1.0857	0.5739	4.7938	0.5999	4.5038	1.9306	0.59	0.6634	0.1736	0.64	5.2938	1.6871	0.5126	4.6659	0.4821	0.9022	0.2864	0.9468	5.5109	0.9651	1.0163	1.3372	1.3392	1.4812	3.2534	3.8157	1.7134	2.5002
8495	TAG48:3-FA18:1	Triacylglycerol	TAG Ester	54585	DMS-MS	100010733			3.4642	4.2735	1.1368	4.2849	0.8903	0.7235	2.5998	0.9888	2.0555	2.2506	1.1978	0.5975	0.2032	0.8886	6.6937	2.5897	3.5552	13.315	2.6171	0.7333	0.7496	0.1391	0.4484	6.1784	2.2542	1.1263	3.3631	0.7487	1.7137	0.194	0.7675	3.6337	3.7642	0.6906	0.5	2.5384	1.0217	2.2591	50.6418	3.7346	2.0318
8496	TAG48:3-FA18:2	Triacylglycerol	TAG Ester	54232	DMS-MS	100010380			9.8802	5.9491	2.2388	6.7349	2.5962	1.1479	3.1722	1.8346	3.4354	4.241	3.0272	1.0445	0.3697	2.116	7.2345	8.7704	4.3175	17.2276	5.0737	1.2416	1.5335	0.3238	1.1078	11.6013	4.8298	1.6734	9.1093	1.4087	2.8004	0.389	1.6398	8.728	4.8296	1.8607	1.4336	4.3306	1.8435	6.7935	56.3358	5.7347	4.4454
8497	TAG48:3-FA18:3	Triacylglycerol	TAG Ester	53544	DMS-MS	100009692			3.1653	1.412	0.5888	0.9902	0.4447	0.1488	0.3844	0.2992	0.9422	1.1775	1.3473	0.188	0.0739	0.4615	0.3384	5.5579	0.4695	2.5269	1.1681	0.1767	0.2001	0.0446	0.1567	1.7054	1.1785	0.2368	2.791	0.1653	0.5237	0.1154	0.1923	1.8984	1.0403	0.4273	0.3852	0.8917	0.4504	2.8752	1.9212	0.8992	0.9178
8501	TAG48:4-FA12:0	Triacylglycerol	TAG Ester	53702	DMS-MS	100009850			0.6984	0.7729	0.2816	1.0593	0.3082	0.1992	0.591	0.3375	1.0539	0.6983	0.2766	0.1824	0.0573	0.2871	1.4659	0.6809	1.5008	3.6882	0.782	0.2245	0.2811	0.0331	0.1095	1.5946	0.7483	0.264	1.1699	0.2264	0.4101	0.0415	0.169	0.9125	1.0979	0.2122	0.0961	0.6321	0.1319	0.5738	18.2979	0.9387	0.363
8502	TAG48:4-FA14:0	Triacylglycerol	TAG Ester	53361	DMS-MS	100009509			0.5814	0.2539	0.1042	0.2243	0.1145	0.0376	0.0724	0.0843	0.135	0.1985	0.1835	0.0476	0.0181	0.1341	0.0599	0.9725	0.1115	0.4665	0.198	0.0496	0.0688	0.0125	0.0481	0.3442	0.2319	0.0433	0.5074	0.0384	0.1084	0.0262	0.0662	0.451	0.1467	0.0945	0.1138	0.1515	0.0974	0.4856	0.4242	0.1784	0.2061
8503	TAG48:4-FA14:1	Triacylglycerol	TAG Ester	54403	DMS-MS	100010551			0.583	0.2306	0.1068	0.2262	0.1194	0.0335	0.0506	0.0834	0.1436	0.1535	0.1871	0.0545	0.0328	0.1323	0.0605	0.4949	0.0485	0.4334	0.2323	0.0731	0.0627	0.0293	0.0736	0.3906	0.2122	0.0438	0.4908	0.05	0.1363	0.0374	0.0826	0.4319	0.1045	0.0988	0.1194	0.1661	0.1348	0.4408	0.1856	0.177	0.2465
8504	TAG48:4-FA16:0	Triacylglycerol	TAG Ester	53362	DMS-MS	100009510			0.6741	0.2505	0.1089	0.2086	0.1216	0.0388	0.0927	0.066	0.1938	0.2141	0.2944	0.0413	0.0347	0.1131	0.0896	0.9419	0.0719	0.7131	0.2366	0.0503	0.0493	0.0216	0.0483	0.3326	0.2204	0.0401	0.4687	0.0464	0.1254	0.0381	0.0457	0.4478	0.1931	0.1036	0.0925	0.1807	0.1035	0.5492	0.4713	0.1713	0.1937
8505	TAG48:4-FA16:1	Triacylglycerol	TAG Ester	53873	DMS-MS	100010021			0.7847	0.2944	0.1222	0.2982	0.1505	0.058	0.0727	0.1144	0.1589	0.2329	0.174	0.0713	0.0312	0.1973	0.0794	0.7465	0.1022	0.6142	0.2901	0.0893	0.0855	0.0253	0.097	0.6144	0.2611	0.0623	0.7022	0.0631	0.1513	0.045	0.1133	0.6443	0.146	0.1297	0.1941	0.1989	0.1696	0.5536	0.4028	0.2371	0.3289
8506	TAG48:4-FA18:1	Triacylglycerol	TAG Ester	54404	DMS-MS	100010552			0.381	0.5016	0.1177	0.36	0.1031	0.069	0.193	0.1094	0.3327	0.2595	0.1472	0.0817	0.0345	0.1166	0.3989	0.3409	0.5587	1.3438	0.3298	0.1136	0.0747	0.0256	0.0685	0.4813	0.2422	0.1017	0.4691	0.072	0.2032	0.0409	0.0742	0.419	0.2829	0.0937	0.0744	0.3256	0.113	0.2719	2.6383	0.3077	0.2272
8507	TAG48:4-FA18:2	Triacylglycerol	TAG Ester	54042	DMS-MS	100010190			1.3136	1.0943	0.4609	1.7022	0.6488	0.2865	0.7972	0.6126	1.8157	1.2128	0.4486	0.2854	0.1029	0.5497	2.1834	1.2531	1.9306	4.9947	1.3938	0.4032	0.5404	0.0815	0.2328	2.7827	1.3222	0.4508	2.2425	0.3991	0.674	0.0804	0.3245	1.3816	1.6802	0.4341	0.248	1.2367	0.2784	1.0783	29.2508	1.4889	0.7097
8508	TAG48:4-FA18:3	Triacylglycerol	TAG Ester	53703	DMS-MS	100009851			1.3588	0.8878	0.2405	0.7946	0.1899	0.1212	0.3164	0.2004	0.5701	0.5685	0.5727	0.1251	0.0487	0.2977	0.5498	1.6512	0.776	2.0993	0.5921	0.1438	0.127	0.027	0.109	0.9713	0.6063	0.1384	1.2657	0.1014	0.3188	0.0679	0.1383	1.2066	0.5768	0.1884	0.2456	0.4775	0.2695	1.1157	4.2462	0.5994	0.4658
8511	TAG48:4-FA20:4	Triacylglycerol	TAG Ester	53874	DMS-MS	100010022			0.2256	0.2014	0.1357	0.2378	0.0682	0.0702	0.1994	0.055	0.1159	0.1729	0.2589	0.0488	0.0195	0.0626	0.0921	0.5089	0.0677	1.4309	0.1493	0.0144	0.0208	0.0112	0.0123	0.213	0.1206	0.0202	0.1892	0.024	0.1483	0.0125	0.0185	0.2665	0.2925	0.0304	0.0395	0.0839	0.0556	0.2503	1.0925	0.2104	0.1554
8518	TAG48:5-FA18:2	Triacylglycerol	TAG Ester	54043	DMS-MS	100010191			0.1615	0.1341	0.059	0.1425	0.0678	0.0321	0.0675	0.0596	0.3335	0.1451	0.0589	0.0397	0.0188	0.0716	0.1393	0.1808	0.2985	0.5454	0.1735	0.0568	0.055	0.0176	0.032	0.2161	0.1493	0.0442	0.4075	0.0409	0.0761	0.0199	0.0329	0.1476	0.1281	0.057	0.0348	0.1504	0.0353	0.1365	1.4381	0.126	0.0891
8519	TAG48:5-FA18:3	Triacylglycerol	TAG Ester	53875	DMS-MS	100010023			0.2151	0.1841	0.0658	0.2133	0.0555	0.04	0.0897	0.068	0.3553	0.1655	0.0958	0.0417	0.0271	0.087	0.1927	0.2363	0.3724	0.6633	0.1633	0.0593	0.0517	0.0119	0.0281	0.2382	0.1743	0.0452	0.4273	0.0455	0.0851	0.0261	0.0389	0.2027	0.1928	0.0545	0.0567	0.1279	0.0519	0.1683	2.0399	0.1881	0.0965
8541	TAG49:0-FA15:0	Triacylglycerol	TAG Ester	53704	DMS-MS	100009852			0.6942	0.4415	0.2222	0.2642	0.1511	0.0373	0.0851	0.083	0.3541	0.4023	0.5574	0.0272	0.046	0.1223	0.0817	0.8603	0.0365	0.5668	0.4647	0.0516	0.0514	0.0378	0.0676	0.5055	0.4214	0.1042	0.9259	0.1605	0.5924	0.0371	0.0843	0.5248	0.1341	0.134	0.0413	0.2514	0.1918	0.6229	0.1096	0.5088	0.804
8542	TAG49:0-FA16:0	Triacylglycerol	TAG Ester	54044	DMS-MS	100010192			3.0275	1.3773	0.7937	0.8849	0.7276	0.132	0.3052	0.2966	1.2422	1.4893	2.2937	0.1079	0.1679	0.4718	0.3172	4.0535	0.107	2.7737	2.0084	0.1894	0.1955	0.1672	0.2394	2.0757	1.4196	0.2862	3.7714	0.573	1.9848	0.1116	0.3276	2.5279	0.7451	0.6028	0.1714	0.884	0.7832	2.7761	0.4264	1.577	2.7914
8543	TAG49:0-FA17:0	Triacylglycerol	TAG Ester	54405	DMS-MS	100010553			1.1872	0.4848	0.3233	0.3752	0.3116	0.0635	0.133	0.1167	0.5882	0.6066	0.9058	0.0636	0.082	0.214	0.1369	1.7709	0.0711	1.1659	0.8153	0.0761	0.0824	0.0733	0.1004	0.8639	0.5926	0.126	1.5758	0.2392	0.8528	0.0887	0.1203	1.0379	0.3624	0.2511	0.1016	0.3542	0.3171	1.1669	0.2071	0.5842	1.123
8544	TAG49:0-FA18:0	Triacylglycerol	TAG Ester	53363	DMS-MS	100009511			0.6019	0.3533	0.2126	0.2693	0.1264	0.0286	0.0684	0.0716	0.3129	0.3082	0.6215	0.017	0.0475	0.1212	0.0676	0.7173	0.0265	0.6502	0.4419	0.0303	0.0449	0.0257	0.0541	0.4629	0.465	0.0582	0.8419	0.1221	0.7045	0.0218	0.0615	0.4269	0.1234	0.1107	0.0295	0.2306	0.1703	0.5759	0.1483	0.5933	0.8778
8549	TAG49:1-FA14:0	Triacylglycerol	TAG Ester	54233	DMS-MS	100010381			0.7451	0.7282	0.2663	0.39	0.21	0.0576	0.1473	0.1124	0.4108	0.3539	0.5103	0.0431	0.0451	0.1653	0.1265	1.1029	0.0635	0.8391	0.4342	0.0425	0.0648	0.0216	0.0563	0.6962	0.4554	0.0883	1.1092	0.1291	0.5263	0.0283	0.1143	0.5453	0.2193	0.1238	0.0559	0.4007	0.2803	0.8493	0.5042	0.4615	0.7256
8551	TAG49:1-FA15:0	Triacylglycerol	TAG Ester	53364	DMS-MS	100009512			4.3015	3.242	1.2272	1.5364	1.0513	0.2855	0.5684	0.6299	1.9356	2.871	2.5504	0.2266	0.2429	0.7225	0.5231	5.9486	0.2919	2.3578	2.7846	0.3955	0.3344	0.3298	0.4967	3.3922	2.0165	0.945	6.3954	1.0856	2.0015	0.2729	0.7306	3.352	0.738	0.9741	0.2609	1.7455	1.3645	3.9445	0.8864	2.1017	3.9326
8552	TAG49:1-FA16:0	Triacylglycerol	TAG Ester	53876	DMS-MS	100010024			7.8104	4.3429	2.0009	2.507	1.9127	0.433	0.9144	0.9627	2.7232	4.624	4.2494	0.3727	0.4064	1.1617	0.8716	9.9763	0.4258	4.7255	4.1303	0.5866	0.5853	0.5262	0.7851	6.162	3.2328	1.2937	10.2859	1.7393	2.9968	0.4026	1.1065	6.3909	1.3373	1.6785	0.5119	2.6624	2.452	7.209	1.4272	3.0541	6.1673
8553	TAG49:1-FA16:1	Triacylglycerol	TAG Ester	53545	DMS-MS	100009693			0.8069	0.2655	0.1672	0.216	0.1836	0.0465	0.0716	0.0881	0.2261	0.383	0.3714	0.0421	0.0425	0.1306	0.0815	0.957	0.0419	0.7412	0.2727	0.0537	0.058	0.0451	0.0787	0.6134	0.2296	0.0688	1.0789	0.1162	0.2329	0.0444	0.1192	0.8959	0.1504	0.1619	0.0912	0.1729	0.3008	0.7168	0.1189	0.2363	0.5866
8554	TAG49:1-FA17:0	Triacylglycerol	TAG Ester	54045	DMS-MS	100010193			1.389	0.872	0.345	0.5501	0.3283	0.0889	0.1745	0.1856	0.6005	0.697	0.7175	0.0821	0.0788	0.2587	0.1644	1.949	0.0861	1.3514	0.6025	0.068	0.1042	0.0495	0.104	1.0381	0.5838	0.1257	1.936	0.1868	0.6114	0.0621	0.1872	1.2584	0.3023	0.2361	0.1105	0.4919	0.4612	1.3296	0.5509	0.5438	1.0735
8556	TAG49:1-FA18:1	Triacylglycerol	TAG Ester	53365	DMS-MS	100009513			5.9339	4.6979	1.9236	2.5673	1.3295	0.4185	0.9188	0.9574	2.4547	3.8265	3.5414	0.3223	0.3158	1.0573	0.7511	8.1667	0.4607	3.2711	3.5969	0.4733	0.5169	0.4409	0.6975	4.8103	3.1498	1.3212	8.5926	1.471	3.1012	0.3506	1.0504	4.3056	0.9736	1.2811	0.3389	2.5228	2.0173	5.7613	1.6743	2.9755	5.211
8563	TAG49:2-FA14:0	Triacylglycerol	TAG Ester	54046	DMS-MS	100010194			0.7054	0.6601	0.2383	0.4675	0.2398	0.0631	0.1338	0.1419	0.4132	0.3612	0.3456	0.0603	0.0471	0.1983	0.1344	1.0666	0.0986	0.6241	0.4435	0.0652	0.106	0.0299	0.0769	0.7771	0.4356	0.1043	1.1793	0.1539	0.331	0.04	0.1515	0.5809	0.1903	0.1477	0.0884	0.4008	0.332	0.8887	0.6998	0.3889	0.6014
8565	TAG49:2-FA15:0	Triacylglycerol	TAG Ester	53877	DMS-MS	100010025			2.8855	1.444	0.7437	1.1265	0.921	0.2427	0.3065	0.518	1.5168	1.7438	1.2505	0.2273	0.1637	0.6131	0.3734	4.2697	0.2496	1.4251	1.8701	0.3673	0.3411	0.2738	0.491	2.5109	1.4653	0.6177	4.5735	0.7655	0.8977	0.2154	0.616	2.4799	0.4691	0.7769	0.279	1.1964	0.9025	2.7333	0.8072	1.1795	2.2564
8566	TAG49:2-FA16:0	Triacylglycerol	TAG Ester	54234	DMS-MS	100010382			3.559	1.2948	0.8225	1.2023	1.1188	0.2266	0.3246	0.4857	1.5129	1.8714	1.5078	0.2138	0.1833	0.673	0.395	4.6972	0.2479	1.8998	1.9318	0.3532	0.3761	0.2877	0.4681	2.9593	1.6553	0.5991	4.8008	0.8217	0.929	0.2242	0.555	2.9235	0.5467	0.9123	0.3311	1.3031	1.0185	3.4434	0.8615	1.2019	2.2836
8567	TAG49:2-FA16:1	Triacylglycerol	TAG Ester	53546	DMS-MS	100009694			1.8751	0.8019	0.4135	0.6658	0.4097	0.1473	0.1844	0.2597	0.3845	0.9741	0.5518	0.135	0.0879	0.3649	0.226	1.8875	0.1426	1.1016	0.7228	0.2035	0.1652	0.1204	0.282	1.6402	0.5423	0.2659	2.4536	0.3239	0.4607	0.1578	0.3739	1.9687	0.2589	0.3637	0.2775	0.4779	0.8994	1.5274	0.4234	0.5858	1.3835
8568	TAG49:2-FA17:0	Triacylglycerol	TAG Ester	53366	DMS-MS	100009514			0.4728	0.3053	0.1493	0.2496	0.1526	0.0399	0.0729	0.0914	0.337	0.2239	0.2841	0.0425	0.037	0.1412	0.072	0.7477	0.0542	0.4381	0.2736	0.0369	0.0591	0.0198	0.0502	0.4366	0.2961	0.0542	0.7758	0.0719	0.203	0.0252	0.0841	0.4055	0.1195	0.1046	0.0527	0.2393	0.1749	0.5525	0.3339	0.2054	0.3879
8570	TAG49:2-FA18:1	Triacylglycerol	TAG Ester	54406	DMS-MS	100010554			2.4562	2.0492	0.673	1.1944	0.559	0.2252	0.3453	0.4849	0.7369	1.3562	0.8808	0.1846	0.1297	0.5185	0.5009	2.6005	0.3383	1.4753	1.2415	0.3172	0.2813	0.1599	0.3741	2.1842	1.027	0.4548	3.3468	0.5156	1.0131	0.1904	0.5922	1.9663	0.4059	0.4618	0.3008	1.088	1.1861	2.1483	1.3528	1.1045	1.9576
8571	TAG49:2-FA18:2	Triacylglycerol	TAG Ester	54047	DMS-MS	100010195			2.6092	1.3068	0.8416	1.1703	1.0201	0.2112	0.3074	0.5171	1.7164	1.4707	1.434	0.196	0.1552	0.6731	0.3683	4.3011	0.2814	1.3344	1.9165	0.2693	0.3857	0.2702	0.4166	2.54	1.8218	0.6193	4.5504	0.7337	0.9843	0.163	0.5124	2.0209	0.4553	0.8364	0.1918	1.3316	0.5907	3.0528	1.0446	1.1973	2.0333
8578	TAG49:3-FA15:0	Triacylglycerol	TAG Ester	53547	DMS-MS	100009695			0.6494	0.289	0.1389	0.2814	0.198	0.0728	0.0625	0.141	0.3026	0.3533	0.2435	0.0679	0.0379	0.181	0.0872	0.9983	0.0836	0.278	0.449	0.1035	0.1032	0.061	0.1499	0.5559	0.3265	0.1248	1.1065	0.1457	0.1927	0.0603	0.161	0.6316	0.0997	0.1893	0.0891	0.2434	0.1848	0.6217	0.2036	0.2581	0.4928
8579	TAG49:3-FA16:0	Triacylglycerol	TAG Ester	53367	DMS-MS	100009515			0.5112	0.1889	0.1113	0.1629	0.1554	0.0394	0.0541	0.0804	0.2108	0.2415	0.2219	0.0374	0.0321	0.114	0.0614	0.7561	0.063	0.2829	0.2719	0.0716	0.0619	0.0328	0.0601	0.3589	0.2377	0.0695	0.653	0.1013	0.1222	0.0427	0.0722	0.3839	0.1058	0.1298	0.0659	0.1837	0.1249	0.5268	0.1152	0.16	0.2693
8580	TAG49:3-FA16:1	Triacylglycerol	TAG Ester	53368	DMS-MS	100009516			0.6639	0.2409	0.1511	0.2781	0.2016	0.0792	0.0758	0.144	0.2117	0.3098	0.1989	0.0791	0.0499	0.1856	0.1147	0.7278	0.0859	0.367	0.3766	0.1344	0.1128	0.058	0.1405	0.6366	0.2793	0.1227	0.9564	0.1479	0.183	0.076	0.1773	0.6641	0.1051	0.1731	0.1563	0.2238	0.2796	0.5316	0.2306	0.2395	0.4762
8583	TAG49:3-FA18:2	Triacylglycerol	TAG Ester	53705	DMS-MS	100009853			1.0904	0.5745	0.2559	0.5592	0.3984	0.1144	0.1232	0.2557	0.5342	0.5215	0.3635	0.1091	0.071	0.3302	0.2157	1.3682	0.1913	0.5533	0.7037	0.1849	0.216	0.093	0.2135	1.0949	0.6112	0.2175	1.6326	0.2632	0.3717	0.0898	0.2819	0.9031	0.1906	0.296	0.1643	0.5656	0.329	1.0461	0.7972	0.5027	0.7387
8584	TAG49:3-FA18:3	Triacylglycerol	TAG Ester	54407	DMS-MS	100010555			0.3794	0.2219	0.0935	0.1444	0.0763	0.0269	0.038	0.065	0.2485	0.2105	0.2669	0.0274	0.0215	0.0923	0.0442	0.7759	0.0537	0.178	0.2239	0.0365	0.0391	0.0223	0.0422	0.2073	0.2305	0.057	0.6066	0.0506	0.1174	0.0302	0.0503	0.2383	0.0747	0.083	0.0389	0.1676	0.0941	0.4738	0.0871	0.1367	0.2137
8615	TAG50:0-FA14:0	Triacylglycerol	TAG Ester	53706	DMS-MS	100009854			0.6821	0.4645	0.2236	0.3008	0.157	0.0692	0.1368	0.1074	0.2523	0.274	0.4381	0.053	0.082	0.1495	0.1783	0.5766	0.0926	1.3893	0.4723	0.063	0.0787	0.0388	0.0637	0.6147	0.3506	0.0942	0.5597	0.1366	0.6201	0.0617	0.0944	0.4789	0.2439	0.1298	0.115	0.2665	0.2165	0.4576	1.4139	0.652	0.7637
8617	TAG50:0-FA16:0	Triacylglycerol	TAG Ester	54235	DMS-MS	100010383			45.2109	13.1704	6.6398	8.0783	8.2139	1.6886	3.5505	2.9105	7.4719	17.792	15.8117	1.6256	2.1065	4.1741	5.3069	38.8602	1.9528	37.8491	24.799	5.2191	2.7856	2.8876	2.8529	31.3947	10.2205	7.4252	27.5865	12.168	11.2524	2.5943	3.5617	30.1694	11.7528	8.1066	4.6856	10.2505	11.1406	26.7174	7.8261	13.0311	21.7614
8619	TAG50:0-FA18:0	Triacylglycerol	TAG Ester	53878	DMS-MS	100010026			16.5904	4.5104	2.6584	3.1961	2.8357	0.5302	1.292	0.9392	3.266	6.101	6.9975	0.4726	0.9082	1.6757	2.0089	13.9652	0.6381	17.7264	9.3802	1.3487	0.9508	0.7792	0.8919	11.963	4.5393	2.0081	9.8189	4.4193	5.8828	0.8096	1.1008	10.419	4.7856	2.6705	1.6616	3.4537	3.9049	10.0226	4.9074	6.6204	9.2707
8625	TAG50:1-FA14:0	Triacylglycerol	TAG Ester	54048	DMS-MS	100010196			6.1587	5.9816	1.756	2.985	1.3202	0.4826	1.2192	1.0342	1.7256	2.5357	2.5442	0.4446	0.4074	1.0483	1.6598	6.1782	1.0686	9.3509	3.7437	0.6772	0.7903	0.2219	0.5727	5.6241	2.4422	1.2638	5.6902	1.2972	2.9396	0.3564	1.0617	4.2425	1.8051	1.0886	0.7986	2.8547	2.0833	4.4689	7.3864	3.8615	4.6603
8628	TAG50:1-FA16:0	Triacylglycerol	TAG Ester	53879	DMS-MS	100010027			231.308	93.0719	41.0506	54.5547	52.6893	15.2017	27.1344	24.1752	40.9164	114.153	69.4152	15.3131	11.5142	26.9784	34.8798	210.523	17.2892	163.378	137.466	43.8016	21.2374	25.8388	24.0393	175.576	53.2455	66.4658	163.598	72.9301	45.3623	21.5538	30.8877	162.98	60.9436	58.3771	33.9392	75.5067	77.9063	150.64	52.8142	63.0618	110.473
8629	TAG50:1-FA16:1	Triacylglycerol	TAG Ester	54236	DMS-MS	100010384			12.3817	3.081	1.5431	2.4254	2.1424	0.6564	0.6804	1.0282	1.1917	4.5619	2.4612	0.6815	0.4961	1.3544	1.1897	9.56	0.5667	11.3979	3.443	1.1326	0.8693	0.7404	1.2384	8.7754	1.9631	1.3994	8.9494	1.9111	1.6877	0.8526	1.4083	11.6853	2.0024	2.1673	2.155	1.9408	3.4653	6.7651	1.8696	2.469	5.416
8631	TAG50:1-FA18:0	Triacylglycerol	TAG Ester	54237	DMS-MS	100010385			13.4375	6.4664	2.5057	3.6702	2.4155	0.6881	1.3561	1.2936	2.5488	4.8592	4.5251	0.6207	0.7391	1.6747	2.0447	10.9126	0.9643	19.304	5.4082	0.9902	1.0428	0.5499	1.0521	10.2128	3.6887	1.4733	10.5935	2.1736	4.1888	0.7143	1.4755	11.2429	2.9218	2.1775	1.8924	3.4362	3.6697	8.1186	6.9779	5.2201	7.8598
8632	TAG50:1-FA18:1	Triacylglycerol	TAG Ester	53880	DMS-MS	100010028			150.226	65.1619	26.2479	35.9758	30.0797	9.3947	16.2325	15.1408	24.8406	72.9131	41.9566	9.2541	6.5393	17.2342	21.4261	138.202	11.8248	99.8985	78.5712	23.0748	12.5929	15.3186	14.7219	119.301	33.7933	42.6126	107.447	41.4772	31.2864	12.9813	19.9261	99.6462	36.7043	33.8983	19.4067	44.1436	46.8214	98.2011	37.8701	42.2071	70.4321
8635	TAG50:1-FA20:1	Triacylglycerol	TAG Ester	53548	DMS-MS	100009696			0.3622	0.1985	0.1243	0.1826	0.1034	0.0335	0.0895	0.0404	0.069	0.2498	0.1327	0.0421	0.0181	0.0668	0.1154	0.4192	0.0533	0.4565	0.1587	0.0249	0.0252	0.0109	0.0232	0.8079	0.1558	0.0442	0.2914	0.0421	0.137	0.0165	0.0506	0.2886	0.1781	0.0487	0.0371	0.104	0.0899	0.313	0.3395	0.1496	0.1988
8639	TAG50:2-FA14:0	Triacylglycerol	TAG Ester	53549	DMS-MS	100009697			26.2251	33.9024	7.9847	17.5998	6.1597	3.0903	6.0468	7.1846	6.4591	12.8804	6.8858	3.0498	1.552	5.1714	9.047	29.1456	8.2124	24.0103	17.0535	5.1213	5.2456	1.4927	3.8281	27.0658	10.2548	9.739	27.7455	6.5248	9.2864	2.2541	7.1251	17.1373	7.8522	5.4854	4.6753	15.4766	11.1652	20.5225	38.2338	15.4229	16.2881
8640	TAG50:2-FA14:1	Triacylglycerol	TAG Ester	53369	DMS-MS	100009517			0.5328	0.5509	0.1606	0.2055	0.1334	0.0374	0.0641	0.1007	0.1627	0.1986	0.2514	0.0402	0.0733	0.1007	0.1093	0.3321	0.0537	0.7708	0.3281	0.0797	0.0609	0.0379	0.0616	0.4422	0.2004	0.0786	0.403	0.1403	0.2847	0.0448	0.0876	0.3884	0.0913	0.1029	0.0942	0.3096	0.2835	0.4488	0.215	0.2865	0.4147
8642	TAG50:2-FA16:0	Triacylglycerol	TAG Ester	54586	DMS-MS	100010734			189.367	53.4892	30.3405	49.1565	50.223	14.5683	15.6361	23.1982	35.5181	86.5889	41.0217	16.0967	8.2806	27.0959	25.1381	173.868	16.6744	121.247	94.3736	36.355	23.5614	23.3757	27.022	159.087	45.5165	44.159	148.308	51.487	27.7492	17.5068	29.8504	144.356	40.3188	52.957	37.2238	58.2371	58.3506	123.951	52.5133	45.2251	83.9321
8643	TAG50:2-FA16:1	Triacylglycerol	TAG Ester	53881	DMS-MS	100010029			84.8604	25.0202	11.203	21.0752	14.2904	6.1314	5.6859	9.168	7.6649	35.8868	12.4676	6.671	3.0682	10.742	9.1576	63.8136	5.3778	52.777	26.326	11.4711	7.1244	6.7637	11.8526	67.0003	13.1117	13.4306	65.2911	14.789	10.5565	7.7182	13.0399	74.2643	12.526	16.1824	17.6447	15.909	29.1512	45.4948	16.5021	18.2614	38.9485
8645	TAG50:2-FA18:0	Triacylglycerol	TAG Ester	54049	DMS-MS	100010197			3.2285	1.8574	0.8371	1.3592	0.9185	0.2354	0.4123	0.5481	1.2783	1.2804	1.2429	0.2415	0.2321	0.6838	0.675	3.3582	0.5188	5.5574	2.0072	0.3979	0.5173	0.1457	0.3742	3.2666	1.5203	0.4955	3.4676	0.6608	1.1335	0.1757	0.5107	2.5322	0.8936	0.7469	0.5811	1.46	0.9373	2.5812	3.6398	1.6114	2.1213
8646	TAG50:2-FA18:1	Triacylglycerol	TAG Ester	53550	DMS-MS	100009698			136.875	87.6193	28.1315	56.2229	25.8487	13.3123	18.2175	22.8698	19.9412	64.5347	25.8515	13.1222	6.4675	20.945	28.1309	115.121	21.0218	95.1808	59.0361	22.2143	17.0153	10.6394	20.5365	120.255	32.8835	33.6308	113.704	29.5306	29.962	13.5588	28.3112	108.528	28.1086	27.5985	29.6597	46.5419	55.4175	84.6884	83.5652	49.0977	72.2348
8647	TAG50:2-FA18:2	Triacylglycerol	TAG Ester	53882	DMS-MS	100010030			75.3883	18.7468	11.7884	17.2289	22.1689	5.0854	5.7886	8.9772	18.0802	31.9154	17.4457	5.582	3.0884	10.6174	9.2776	82.6529	7.5567	43.3719	40.9247	12.6112	9.7204	9.8419	8.9751	66.6646	21.6123	20.2437	58.2522	22.0911	11.4442	5.4766	9.8224	47.2854	16.9348	23.0083	10.7897	24.3564	15.3659	57.1137	24.4586	18.5666	29.165
8651	TAG50:2-FA20:2	Triacylglycerol	TAG Ester	54238	DMS-MS	100010386			0.3937	0.1587	0.1184	0.177	0.0992	0.0302	0.0747	0.0499	0.066	0.2525	0.1154	0.0459	0.0174	0.0772	0.0682	0.3983	0.0281	0.4775	0.1127	0.0245	0.0299	0.0083	0.0171	0.9383	0.1775	0.0436	0.3036	0.0346	0.0885	0.0147	0.0448	0.3274	0.1677	0.0604	0.042	0.1135	0.0835	0.2746	0.3943	0.1236	0.1581
8654	TAG50:3-FA14:0	Triacylglycerol	TAG Ester	53707	DMS-MS	100009855			21.828	17.2362	5.7817	14.9897	8.0502	2.9818	3.9049	8.085	8.0461	10.1354	4.7727	3.1172	1.3393	5.939	6.9742	27.7996	9.395	16.3675	17.4288	5.8106	7.7044	1.7118	4.1256	27.5907	11.8381	8.7273	25.9458	6.4316	7.035	1.7325	6.5344	14.1882	7.0418	6.3725	4.7356	16.1509	5.9181	18.8729	43.6308	13.5354	11.8258
8655	TAG50:3-FA14:1	Triacylglycerol	TAG Ester	54587	DMS-MS	100010735			1.5926	2.2737	0.5423	0.8984	0.4371	0.1587	0.2315	0.4893	0.4661	0.6784	0.509	0.2199	0.1845	0.3763	0.3899	1.0183	0.3249	1.6859	1.0665	0.4556	0.3102	0.1854	0.3394	1.487	0.6335	0.4968	1.4212	0.4572	0.755	0.1881	0.4298	1.0519	0.3245	0.3561	0.4075	1.4586	0.9998	1.479	0.984	0.8777	1.1533
8657	TAG50:3-FA16:0	Triacylglycerol	TAG Ester	54050	DMS-MS	100010198			58.8258	11.1308	6.4727	13.362	12.9642	4.3398	3.0324	7.0289	8.5622	20.9972	8.8635	4.9985	1.9376	9.062	5.7682	55.0954	5.1482	29.6143	25.0159	10.3455	6.964	5.4896	9.4593	48.407	12.9809	9.1766	46.905	10.8082	6.8639	4.7492	8.1392	46.7142	8.81	14.6646	12.7016	12.3004	11.7708	34.4076	14.1064	12.0827	22.3108
8658	TAG50:3-FA16:1	Triacylglycerol	TAG Ester	53885	DMS-MS	100010033			51.0186	10.9724	6.0627	13.3874	10.9768	4.4057	2.8209	6.9789	6.0329	18.4205	6.0905	5.2552	1.8001	8.5034	5.3744	38.5718	4.3864	28.0706	19.9747	8.9867	6.5617	4.5562	9.3128	46.2169	9.7748	8.0178	40.3334	9.4202	6.5247	4.5596	9.3986	44.1657	7.04	11.9294	14.5792	10.6505	14.045	27.7137	13.4824	11.4873	21.7806
8660	TAG50:3-FA18:0	Triacylglycerol	TAG Ester	53708	DMS-MS	100009856			0.5153	0.3299	0.1356	0.2388	0.1488	0.0457	0.0659	0.1123	0.2429	0.1991	0.2085	0.0439	0.0491	0.129	0.1092	0.5686	0.125	0.8184	0.3773	0.0813	0.0947	0.027	0.0679	0.4515	0.2701	0.0879	0.6404	0.1006	0.2062	0.0403	0.0875	0.352	0.1404	0.1253	0.1068	0.2894	0.138	0.4441	0.505	0.2483	0.3198
8661	TAG50:3-FA18:1	Triacylglycerol	TAG Ester	54409	DMS-MS	100010557			30.8197	24.3608	7.6521	18.4513	9.4008	3.8508	4.8655	9.5788	9.0967	13.8762	6.3493	4.2088	1.8349	7.739	8.5069	33.3886	10.1242	23.9246	21.4692	7.7931	8.7243	2.3078	6.1008	36.5643	13.263	10.0629	33.5053	7.9108	9.3021	2.8129	8.9593	22.006	8.132	7.9081	8.6425	19.0543	11.5552	25.1186	45.1316	15.5704	17.6259
8662	TAG50:3-FA18:2	Triacylglycerol	TAG Ester	53886	DMS-MS	100010034			66.6341	25.9008	10.9537	26.588	18.7234	6.7675	6.4907	13.9785	14.4682	26.2501	10.7506	7.4638	2.9611	13.5258	11.9167	63.4399	12.6865	38.425	36.3122	12.7282	13.474	6.2714	12.7214	65.7703	21.4549	15.4565	61.8918	15.7329	12.9349	5.7378	13.8975	52.5338	12.7665	17.9588	15.2387	25.7688	15.079	44.1943	53.9112	22.5361	30.3078
8663	TAG50:3-FA18:3	Triacylglycerol	TAG Ester	54051	DMS-MS	100010199			9.5417	2.8195	1.2177	1.8918	1.4172	0.4329	0.5459	0.8916	2.2338	3.7796	2.7491	0.5853	0.2883	1.2989	0.9068	14.7192	1.2054	5.1274	4.3177	1.6317	0.7515	0.5598	0.8148	5.179	2.5719	1.4197	7.387	1.2048	1.1283	0.7305	0.7345	5.3621	2.3591	2.0452	1.6976	2.2698	2.0079	8.5848	1.6852	1.8333	2.7131
8667	TAG50:3-FA20:3	Triacylglycerol	TAG Ester	54588	DMS-MS	100010736			0.6779	0.3667	0.2307	0.3223	0.1941	0.0609	0.1157	0.1235	0.1719	0.4705	0.3155	0.0762	0.0354	0.141	0.0949	1.1268	0.0447	0.8073	0.2182	0.0395	0.0582	0.0186	0.0221	0.8072	0.2778	0.0526	0.6568	0.0563	0.145	0.0287	0.0573	0.7411	0.3394	0.1182	0.1067	0.2281	0.2128	0.7647	0.6304	0.2461	0.2751
8670	TAG50:4-FA14:0	Triacylglycerol	TAG Ester	54589	DMS-MS	100010737			7.362	4.3649	1.7177	4.5587	3.8507	0.9756	1.0413	3.0439	4.0939	3.2023	1.6789	1.1296	0.4412	2.5471	2.0312	11.0533	3.9756	4.8159	6.8952	2.1067	3.6525	0.5783	1.5633	9.2501	4.9518	2.4829	10.177	2.1444	2.1627	0.5366	2.084	4.7096	2.3706	2.7555	1.8112	5.4598	1.4245	6.9145	14.9238	4.1061	3.4412
8671	TAG50:4-FA14:1	Triacylglycerol	TAG Ester	53887	DMS-MS	100010035			1.0523	1.1249	0.3418	0.7297	0.4675	0.1406	0.1457	0.4979	0.4966	0.4838	0.3464	0.214	0.1625	0.3878	0.3052	0.8842	0.3459	1.0287	1.0085	0.4622	0.4084	0.191	0.3222	1.2602	0.5794	0.3657	1.1996	0.361	0.4994	0.1486	0.3871	0.751	0.2609	0.3605	0.3746	1.3108	0.4707	1.1286	0.932	0.624	0.734
8673	TAG50:4-FA16:0	Triacylglycerol	TAG Ester	53371	DMS-MS	100009519			6.3253	1.5412	0.714	1.4271	1.1573	0.3765	0.3508	0.7704	1.0698	2.1363	1.4094	0.4595	0.1917	1.0565	0.5724	8.2334	0.6962	3.1436	2.3577	0.8218	0.7283	0.3273	0.8571	3.4865	1.469	0.6651	4.873	0.6809	0.718	0.5284	0.6325	4.7562	1.2075	1.4029	1.6103	1.3074	1.1818	4.6995	1.2554	1.1547	1.9617
8674	TAG50:4-FA16:1	Triacylglycerol	TAG Ester	54052	DMS-MS	100010200			9.1097	1.9888	0.9986	2.806	1.774	0.9409	0.4514	1.591	1.1286	2.9501	1.0357	1.2204	0.3145	2.1442	1.0043	7.2516	1.2104	4.9739	4.1357	2.1224	1.5777	0.6461	2.0886	7.9192	2.0602	1.2572	8.206	1.3196	1.2714	0.9447	2.0186	8.4528	1.2146	2.1121	4.194	1.947	2.473	5.2211	2.6116	2.1437	4.0433
8676	TAG50:4-FA18:1	Triacylglycerol	TAG Ester	53888	DMS-MS	100010036			3.4342	3.0691	0.8245	1.865	0.9253	0.3653	0.455	1.0135	1.3192	1.4192	0.8831	0.4507	0.2479	1.0359	0.8468	4.1805	1.5481	2.7389	2.5419	0.9213	0.8752	0.2509	0.6902	3.317	1.7422	0.8287	4.1747	0.7085	1.1356	0.3302	0.885	2.2786	0.8764	0.9098	1.0016	2.1833	1.0966	3.1553	3.3998	1.6487	1.9155
8677	TAG50:4-FA18:2	Triacylglycerol	TAG Ester	54053	DMS-MS	100010201			13.3063	6.2123	2.8372	7.9453	7.1455	1.8474	1.5892	5.6969	6.8034	5.5797	2.5125	2.1605	0.8228	4.5053	3.3908	16.3034	5.6204	8.3083	11.8282	4.232	6.8839	1.2506	3.2246	17.3135	8.2509	4.3168	17.6307	4.047	3.7456	1.1223	4.096	9.4012	3.7374	5.2268	4.2072	9.7154	2.9501	11.5781	24.5351	7.0006	6.6448
8678	TAG50:4-FA18:3	Triacylglycerol	TAG Ester	53552	DMS-MS	100009700			9.4537	3.8583	1.1866	3.0758	1.3592	0.6375	0.6782	1.5002	2.075	3.3931	1.9274	0.7671	0.3264	1.8131	1.1796	11.0715	2.0494	4.8489	3.861	1.3137	1.1577	0.3946	1.1847	5.4794	2.6489	1.1993	8.103	1.0504	1.2612	0.7864	1.1514	6.5089	1.9417	1.7515	2.5082	2.8777	2.2065	7.2004	4.1426	2.5091	3.1028
8681	TAG50:4-FA20:3	Triacylglycerol	TAG Ester	54239	DMS-MS	100010387			0.3253	0.2415	0.1072	0.2454	0.0834	0.0494	0.0835	0.0777	0.089	0.2039	0.1337	0.0454	0.0257	0.0844	0.104	0.3279	0.066	0.5533	0.1276	0.0349	0.0402	0.0101	0.0165	0.422	0.1318	0.034	0.3329	0.0353	0.0846	0.0224	0.0388	0.4112	0.1662	0.0529	0.0734	0.1325	0.1492	0.293	1.0313	0.176	0.1395
8682	TAG50:4-FA20:4	Triacylglycerol	TAG Ester	54054	DMS-MS	100010202			1.8619	0.893	0.7643	0.7718	0.4901	0.1722	0.3908	0.2653	0.5853	1.0545	1.3986	0.131	0.0823	0.2865	0.2142	4.7369	0.1282	2.2786	0.707	0.0756	0.1102	0.0629	0.0517	1.0108	0.5882	0.0852	1.2848	0.1408	0.3891	0.0623	0.0896	1.1733	0.9918	0.24	0.3622	0.5533	0.406	2.2887	1.605	0.617	0.6563
8685	TAG50:5-FA14:0	Triacylglycerol	TAG Ester	54240	DMS-MS	100010388			1.197	0.6233	0.235	0.5993	0.3518	0.1254	0.1411	0.359	0.7774	0.4854	0.2956	0.1578	0.0668	0.4103	0.2509	2.3	0.7621	0.7695	0.9181	0.2776	0.3562	0.0504	0.196	1.0367	0.7408	0.2305	1.9934	0.1889	0.2981	0.0879	0.221	0.7276	0.3462	0.366	0.3181	0.6366	0.2207	1.2486	1.4428	0.5126	0.4647
8686	TAG50:5-FA14:1	Triacylglycerol	TAG Ester	53889	DMS-MS	100010037			0.5256	0.3764	0.1529	0.3821	0.2618	0.0886	0.1074	0.2403	0.3373	0.2197	0.1816	0.1406	0.1382	0.213	0.1776	0.4723	0.1728	0.5496	0.5069	0.2232	0.2369	0.0942	0.1274	0.5211	0.2796	0.156	0.6198	0.2302	0.2093	0.1147	0.1531	0.3994	0.1396	0.1839	0.1715	0.5067	0.1915	0.5622	0.3449	0.285	0.2945
8688	TAG50:5-FA16:0	Triacylglycerol	TAG Ester	54410	DMS-MS	100010558			0.6931	0.1963	0.1007	0.1821	0.1492	0.0346	0.0517	0.0967	0.1463	0.2428	0.2417	0.0411	0.0243	0.1522	0.0779	1.3414	0.1229	0.5258	0.2827	0.08	0.1016	0.0312	0.0492	0.206	0.1631	0.053	0.404	0.056	0.1281	0.0539	0.0358	0.3757	0.1799	0.1392	0.1626	0.1613	0.114	0.6996	0.2885	0.1289	0.1519
8689	TAG50:5-FA16:1	Triacylglycerol	TAG Ester	53890	DMS-MS	100010038			1.0348	0.2786	0.1266	0.3264	0.1728	0.0902	0.0555	0.1946	0.1554	0.334	0.176	0.1232	0.0422	0.2836	0.1046	1.0917	0.1831	0.573	0.4239	0.2149	0.1727	0.0426	0.2061	0.6119	0.2354	0.0999	0.8454	0.0904	0.1417	0.1059	0.177	0.8517	0.1705	0.2147	0.5433	0.2224	0.2676	0.7069	0.2611	0.2276	0.3915
8691	TAG50:5-FA18:1	Triacylglycerol	TAG Ester	53553	DMS-MS	100009701			0.4145	0.3637	0.1015	0.236	0.1186	0.0543	0.0892	0.1391	0.1906	0.1861	0.1307	0.0653	0.0561	0.1591	0.1349	0.5235	0.1766	0.4415	0.2856	0.1096	0.1033	0.0366	0.0724	0.2918	0.1944	0.0752	0.411	0.0843	0.1482	0.0489	0.084	0.2564	0.143	0.1075	0.1303	0.2809	0.1412	0.3917	0.5011	0.1883	0.2056
8692	TAG50:5-FA18:2	Triacylglycerol	TAG Ester	53372	DMS-MS	100009520			1.4727	0.812	0.3121	0.7987	0.6051	0.1665	0.1596	0.5913	1.0153	0.6092	0.3453	0.2313	0.1159	0.59	0.3461	2.2006	0.8141	1.0016	1.3142	0.4893	0.6259	0.1317	0.3442	1.5126	0.9772	0.3411	2.5966	0.3233	0.4209	0.1351	0.3651	0.9414	0.4049	0.56	0.4582	1.0789	0.3122	1.4023	1.8278	0.683	0.6859
8693	TAG50:5-FA18:3	Triacylglycerol	TAG Ester	54411	DMS-MS	100010559			2.0481	1.0611	0.346	0.9786	0.4793	0.1802	0.181	0.6315	1.0787	0.7485	0.5035	0.2479	0.1017	0.7184	0.3643	3.0782	0.9586	1.1587	1.4295	0.4962	0.5376	0.0904	0.3541	1.5473	1.087	0.3533	2.8761	0.2793	0.4156	0.1793	0.3701	1.3395	0.5531	0.5297	0.7447	1.0757	0.4832	1.8247	1.8965	0.8199	0.7665
8696	TAG50:5-FA20:4	Triacylglycerol	TAG Ester	54590	DMS-MS	100010738			0.813	0.5239	0.2989	0.4898	0.2122	0.1271	0.2893	0.1521	0.2809	0.4434	0.6186	0.0731	0.0519	0.156	0.2244	1.2932	0.1434	1.3047	0.3372	0.0548	0.0616	0.0344	0.03	0.4983	0.2535	0.0504	0.5746	0.0754	0.1978	0.0339	0.0532	0.6418	0.467	0.1023	0.1978	0.2465	0.23	0.8495	1.9311	0.3917	0.3206
8697	TAG50:5-FA20:5	Triacylglycerol	TAG Ester	54241	DMS-MS	100010389			0.5796	0.1614	0.1145	0.1396	0.1424	0.0398	0.0642	0.083	0.1423	0.2034	0.2261	0.022	0.0223	0.1364	0.0854	1.6677	0.1633	0.4061	0.2731	0.0246	0.1132	0.0076	0.0131	0.1143	0.1073	0.0236	0.3521	0.0234	0.2082	0.0182	0.0248	0.2998	0.132	0.0677	0.0765	0.1365	0.1266	0.9948	0.278	0.1124	0.123
8709	TAG50:6-FA20:4	Triacylglycerol	TAG Ester	54055	DMS-MS	100010203			0.1182	0.1136	0.0769	0.1409	0.061	0.0437	0.0859	0.0584	0.1098	0.1137	0.1161	0.0325	0.0267	0.047	0.0805	0.198	0.0684	0.3892	0.1124	0.0249	0.0223	0.0163	0.0098	0.1268	0.0685	0.0224	0.1233	0.0377	0.0495	0.0165	0.0181	0.1223	0.1626	0.0336	0.0516	0.0769	0.0521	0.1441	1.0799	0.1147	0.0719
8733	TAG51:0-FA16:0	Triacylglycerol	TAG Ester	54242	DMS-MS	100010390			1.7438	0.7396	0.3365	0.4087	0.3866	0.0651	0.1386	0.1559	0.6733	0.6907	0.8605	0.0546	0.1304	0.2759	0.2007	1.7707	0.1022	1.7416	1.0388	0.1762	0.1222	0.0821	0.115	1.0801	0.593	0.1736	1.6058	0.6218	0.7998	0.0767	0.1573	0.9171	0.3916	0.2706	0.125	0.5716	0.5901	1.4797	0.2682	0.7221	1.2792
8734	TAG51:0-FA17:0	Triacylglycerol	TAG Ester	53709	DMS-MS	100009857			0.8098	0.4495	0.2225	0.2859	0.2159	0.0501	0.0798	0.1086	0.5243	0.3948	0.5357	0.0359	0.0806	0.1643	0.106	1.011	0.0576	0.791	0.5675	0.0744	0.0791	0.0589	0.0784	0.6379	0.3601	0.1301	1.1689	0.2994	0.4923	0.0555	0.1201	0.6048	0.2066	0.1707	0.0643	0.3426	0.2971	0.7826	0.1525	0.4499	0.8465
8735	TAG51:0-FA18:0	Triacylglycerol	TAG Ester	53554	DMS-MS	100009702			0.7465	0.3985	0.2141	0.264	0.1759	0.0336	0.0725	0.0866	0.456	0.3142	0.6001	0.0228	0.0739	0.1482	0.0928	0.7886	0.043	0.8714	0.5276	0.0541	0.0629	0.0414	0.0658	0.5953	0.413	0.0778	0.9736	0.2537	0.6101	0.0335	0.0885	0.4636	0.1738	0.1416	0.0536	0.3038	0.2605	0.6837	0.1529	0.5877	0.9533
8744	TAG51:1-FA15:0	Triacylglycerol	TAG Ester	53373	DMS-MS	100009521			0.9283	0.9483	0.3172	0.4169	0.2279	0.0873	0.1202	0.219	0.5663	0.507	0.5118	0.0549	0.0903	0.1903	0.177	0.9943	0.1254	0.6954	0.7396	0.1527	0.1244	0.0888	0.165	0.688	0.4382	0.303	1.2984	0.4433	0.575	0.0877	0.2269	0.5466	0.1617	0.2099	0.0929	0.5977	0.4306	0.7756	0.3191	0.6046	1
8745	TAG51:1-FA16:0	Triacylglycerol	TAG Ester	53710	DMS-MS	100009858			6.9161	3.8347	1.6165	2.0685	1.8676	0.3799	0.6759	0.8686	3.0021	3.1592	3.1595	0.3313	0.4857	1.1326	0.9567	8.2733	0.4333	5.1741	4.0841	0.7728	0.638	0.5735	0.7109	5.3139	2.2439	1.2221	9.0873	2.6034	2.2115	0.424	0.9956	4.5904	1.5701	1.4911	0.5863	3.0133	2.7826	6.7573	1.3554	2.3828	5.084
8747	TAG51:1-FA17:0	Triacylglycerol	TAG Ester	54412	DMS-MS	100010560			5.2225	3.2693	1.308	1.8105	1.3774	0.3894	0.5462	0.7967	2.6901	2.6862	2.4368	0.3297	0.4689	1.007	0.723	7.0133	0.4792	3.7979	3.3887	0.5748	0.5466	0.487	0.598	4.0175	1.7562	1.1683	7.4968	1.8822	1.8042	0.4306	0.9383	3.657	1.1507	1.172	0.4591	2.4202	2.0633	5.2075	1.1311	1.8703	4.2208
8748	TAG51:1-FA18:0	Triacylglycerol	TAG Ester	54591	DMS-MS	100010739			1.295	0.9403	0.385	0.4868	0.3129	0.0875	0.1428	0.2106	0.6417	0.6058	0.7478	0.0655	0.1245	0.2479	0.208	1.3726	0.112	1.2331	0.8795	0.1511	0.153	0.0992	0.1614	1.0397	0.592	0.2438	1.7863	0.4963	0.7738	0.0914	0.23	0.8912	0.2312	0.2687	0.1158	0.623	0.5528	1.134	0.345	0.8053	1.3309
8749	TAG51:1-FA18:1	Triacylglycerol	TAG Ester	53891	DMS-MS	100010039			6.6229	5.3848	1.8125	2.4703	1.6437	0.4854	0.7171	1.1926	3.2536	3.3579	3.2173	0.3813	0.5114	1.3287	0.9892	8.4809	0.6196	4.4043	4.3249	0.7591	0.7236	0.6267	0.909	5.6646	2.5581	1.6435	9.697	2.5901	2.7995	0.4924	1.3593	4.3483	1.3407	1.5078	0.6013	3.3615	2.8692	6.6809	1.74	2.8496	5.7291
8758	TAG51:2-FA15:0	Triacylglycerol	TAG Ester	54243	DMS-MS	100010391			3.7917	5.0377	1.3682	2.3033	1.0331	0.5646	0.5927	1.4335	1.8955	2.4425	1.4847	0.4195	0.3763	0.9156	0.9228	4.9426	0.8755	1.7279	3.4407	1.1351	0.8089	0.623	1.1253	3.1529	1.7205	2.2867	6.2002	2.0763	2.0334	0.5771	1.5025	2.436	0.7662	1.0127	0.497	3.1896	2.1358	3.5633	1.9446	2.2747	3.6233
8759	TAG51:2-FA16:0	Triacylglycerol	TAG Ester	53374	DMS-MS	100009522			8.1482	4.3368	2.0699	3.3842	2.7431	0.8515	0.9717	1.6086	3.6739	4.4171	2.8171	0.7864	0.8547	1.9284	1.5268	9.9188	0.9709	4.9115	5.0604	1.548	1.3336	1.1426	1.474	7.8293	2.9217	2.0877	12.0974	3.6199	2.2551	0.9432	1.7834	6.0368	1.8504	2.2953	1.3817	4.0135	4.0439	8.4698	2.6361	2.7541	5.9787
8760	TAG51:2-FA16:1	Triacylglycerol	TAG Ester	53375	DMS-MS	100009523			1.379	0.7515	0.3135	0.5295	0.372	0.1267	0.1138	0.2525	0.43	0.6669	0.4016	0.1183	0.0979	0.3344	0.2002	1.4345	0.1132	1.0981	0.6913	0.2039	0.1779	0.1091	0.219	1.324	0.4093	0.2268	1.9824	0.4177	0.3675	0.1127	0.3408	1.1669	0.2373	0.2837	0.2557	0.5172	0.9104	1.3061	0.3673	0.4419	1.0833
8761	TAG51:2-FA17:0	Triacylglycerol	TAG Ester	54056	DMS-MS	100010204			3.3457	1.5694	0.8589	1.4475	1.2409	0.3475	0.3589	0.7101	2.0995	1.7635	1.3357	0.3527	0.3755	0.9506	0.5483	4.9186	0.4096	2.4248	2.5235	0.5416	0.5792	0.4237	0.5649	3.1594	1.4025	0.7908	5.4573	1.3591	0.9694	0.3541	0.8317	2.6235	0.7529	1.0225	0.4877	1.7413	1.3796	3.5502	1.0921	1.1376	2.4342
8762	TAG51:2-FA18:0	Triacylglycerol	TAG Ester	54592	DMS-MS	100010740			0.5417	0.3492	0.2509	0.2966	0.2683	0.1419	0.1488	0.2092	0.4017	0.3225	0.3434	0.1453	0.1554	0.2256	0.2067	0.639	0.1756	0.5137	0.492	0.1874	0.1921	0.1562	0.198	0.502	0.3605	0.2219	0.7924	0.3038	0.3119	0.147	0.2126	0.4102	0.1972	0.2375	0.1716	0.3893	0.2883	0.5394	0.2887	0.3425	0.4913
8763	TAG51:2-FA18:1	Triacylglycerol	TAG Ester	53555	DMS-MS	100009703			12.3943	12.9043	4.1001	6.8766	3.4376	1.6455	1.917	3.6623	4.8122	7.5303	4.3949	1.2912	1.2057	3.0228	2.8261	14.8432	2.2502	6.5053	9.4445	3.0034	2.3096	1.8915	3.0039	11.2041	4.9214	5.43	19.7609	6.0687	5.5251	1.7086	4.2136	8.8263	2.3782	3.1933	1.9635	8.1193	7.6597	12.4747	5.4057	6.4409	11.0337
8764	TAG51:2-FA18:2	Triacylglycerol	TAG Ester	54413	DMS-MS	100010561			2.7569	1.4503	0.7468	1.163	1.2303	0.2704	0.274	0.6952	2.2405	1.4186	1.3077	0.232	0.2503	0.8097	0.4639	4.5883	0.4001	1.8029	2.3625	0.4634	0.5829	0.4031	0.5261	2.8563	1.5308	0.7507	5.0864	1.3311	0.988	0.2145	0.6746	2.0052	0.6342	0.989	0.3481	1.7856	0.8451	3.3945	1.0877	1.1284	2.1426
8772	TAG51:3-FA15:0	Triacylglycerol	TAG Ester	54593	DMS-MS	100010741			3.0423	2.6336	0.942	2.0728	1.367	0.5638	0.4292	1.6432	2.1349	1.9176	0.9878	0.451	0.3356	1.0377	0.8394	4.7526	0.984	1.1866	3.7553	1.2756	1.1704	0.731	1.2325	3.2775	1.9453	1.9735	5.7123	2.0234	1.6574	0.4894	1.454	2.1141	0.6578	1.1975	0.4999	3.1291	1.1769	3.1364	2.2516	1.9741	2.674
8773	TAG51:3-FA16:0	Triacylglycerol	TAG Ester	53711	DMS-MS	100009859			9.452	7.7123	7.2038	7.6817	7.7621	6.451	6.7042	7.1748	7.7453	8.0398	7.3499	6.6399	6.4901	7.1639	6.9864	10.117	6.6643	7.99	8.6007	6.8551	6.9797	7.0423	7.1642	9.6915	7.5072	7.3722	10.8957	7.7149	7.2431	6.6668	7.1864	8.5569	7.0233	7.3255	6.96	8.1184	7.4253	9.5956	7.7836	7.3494	8.4334
8774	TAG51:3-FA16:1	Triacylglycerol	TAG Ester	53376	DMS-MS	100009524			1.1783	0.6238	0.2843	0.5781	0.3842	0.143	0.1092	0.2906	0.4002	0.574	0.2685	0.1464	0.1052	0.3919	0.2208	1.167	0.1652	0.8234	0.7523	0.2759	0.24	0.124	0.2688	1.3097	0.3961	0.2448	1.8048	0.4045	0.3196	0.1288	0.3756	1.0085	0.1916	0.2904	0.3725	0.5101	0.8115	1.1858	0.4424	0.4265	0.973
8775	TAG51:3-FA17:0	Triacylglycerol	TAG Ester	53377	DMS-MS	100009525			0.7765	0.3149	0.1752	0.3392	0.2693	0.0962	0.0684	0.1874	0.4336	0.3649	0.24	0.0969	0.0767	0.2754	0.117	1.1034	0.1268	0.5011	0.5943	0.1523	0.156	0.0895	0.1694	0.7188	0.3432	0.1411	1.3252	0.2422	0.2102	0.0816	0.2213	0.6079	0.1543	0.2464	0.1638	0.3584	0.2929	0.8213	0.2605	0.2517	0.5357
8777	TAG51:3-FA18:1	Triacylglycerol	TAG Ester	53378	DMS-MS	100009526			8.4728	7.6701	5.6751	6.8934	5.8177	4.9197	4.7764	6.1227	6.2465	6.6928	5.496	4.8399	4.6384	5.4787	5.4261	9.7589	5.4755	6.1996	8.4875	5.6007	5.5499	5.02	5.7219	8.8646	6.4817	6.4714	10.9374	6.5581	6.2002	4.9546	6.1435	7.0077	5.1967	5.5837	5.219	7.8421	6.2861	8.3135	6.9506	6.606	7.9108
8778	TAG51:3-FA18:2	Triacylglycerol	TAG Ester	54244	DMS-MS	100010392			5.5609	3.4133	1.5005	3.2598	2.4632	0.837	0.6518	2.196	3.2167	3.0596	1.7477	0.7192	0.5425	1.8286	1.2668	7.8489	1.3263	2.526	5.4383	1.7538	1.7217	1.0884	1.755	6.2475	3.1154	2.5124	9.9848	3.1556	2.3202	0.7048	2.0136	4.0939	1.0927	2.0141	1.0249	4.24	2.1475	6.0301	3.2816	2.8176	4.5145
8779	TAG51:3-FA18:3	Triacylglycerol	TAG Ester	53712	DMS-MS	100009860			0.3505	0.2017	0.085	0.1321	0.0857	0.0282	0.0303	0.0835	0.2801	0.1629	0.2092	0.026	0.0269	0.1096	0.0543	0.744	0.0662	0.2223	0.2414	0.054	0.0446	0.0247	0.056	0.2214	0.1836	0.0598	0.6468	0.086	0.1008	0.0302	0.0576	0.2398	0.0882	0.0944	0.062	0.1659	0.1203	0.4998	0.0847	0.1237	0.2119
8785	TAG51:4-FA15:0	Triacylglycerol	TAG Ester	53556	DMS-MS	100009704			1.0462	0.6872	0.2919	0.684	0.6704	0.2107	0.1279	0.6396	1.0819	0.6289	0.368	0.1905	0.1343	0.4627	0.2924	2.0028	0.4233	0.4309	1.5047	0.4693	0.5789	0.2556	0.4542	1.1803	0.8603	0.5639	2.2613	0.6859	0.5376	0.1629	0.4649	0.7812	0.2289	0.5249	0.2238	1.0842	0.3224	1.2462	0.7887	0.5992	0.7896
8786	TAG51:4-FA16:0	Triacylglycerol	TAG Ester	54414	DMS-MS	100010562			1.192	0.9301	0.881	0.9027	0.9402	0.7835	0.7867	0.8439	0.9307	1.0094	0.9182	0.7837	0.7773	0.8797	0.8352	1.5209	0.8114	0.9727	1.0614	0.8329	0.823	0.7916	0.8519	1.1226	0.9157	0.8493	1.3529	0.8761	0.8382	0.7949	0.8481	1.0542	0.8403	0.8979	0.8725	0.9536	0.8838	1.2742	0.8807	0.875	0.9627
8787	TAG51:4-FA16:1	Triacylglycerol	TAG Ester	54245	DMS-MS	100010393			0.3993	0.1674	0.0915	0.2042	0.1661	0.0613	0.0464	0.1279	0.1637	0.1938	0.0902	0.0673	0.0429	0.166	0.0899	0.41	0.0925	0.2427	0.3027	0.1345	0.1235	0.0525	0.1086	0.4677	0.1491	0.0986	0.5803	0.1437	0.1131	0.0543	0.1364	0.3259	0.0763	0.13	0.1802	0.1812	0.2107	0.3764	0.1838	0.1554	0.2959
8789	TAG51:4-FA18:1	Triacylglycerol	TAG Ester	54415	DMS-MS	100010563			1.0531	0.9562	0.6799	0.826	0.7816	0.5975	0.606	0.7865	0.8384	0.8287	0.7054	0.6194	0.595	0.7265	0.6754	1.303	0.7722	0.7705	1.0367	0.7217	0.6878	0.575	0.6987	1.0304	0.8232	0.7344	1.3291	0.7402	0.7822	0.6162	0.7156	0.828	0.6603	0.6944	0.652	1.0067	0.7511	1.0992	0.7996	0.8164	0.8906
8790	TAG51:4-FA18:2	Triacylglycerol	TAG Ester	53557	DMS-MS	100009705			1.791	0.8745	0.4721	1.1362	1.2485	0.3496	0.2035	1.1231	1.54	0.9625	0.5043	0.3373	0.2016	0.8182	0.501	2.8365	0.6573	0.7102	2.4689	0.8919	1.0675	0.4422	0.7612	2.255	1.3927	0.9492	3.5014	1.2369	0.8523	0.2751	0.8316	1.3059	0.3688	0.8932	0.4365	1.8532	0.5646	1.9766	1.4433	1.0443	1.3207
8791	TAG51:4-FA18:3	Triacylglycerol	TAG Ester	54057	DMS-MS	100010205			0.7452	0.5195	0.1673	0.3531	0.1869	0.0781	0.071	0.2343	0.4431	0.3694	0.2791	0.0737	0.0613	0.2567	0.1327	1.2803	0.1922	0.3359	0.5914	0.187	0.1525	0.066	0.1781	0.5203	0.3847	0.1823	1.2334	0.2144	0.2211	0.0967	0.1703	0.4915	0.1504	0.2008	0.1576	0.445	0.2985	0.8963	0.2427	0.2961	0.4525
8793	TAG51:4-FA20:4	Triacylglycerol	TAG Ester	53713	DMS-MS	100009861			0.2274	0.1517	0.1346	0.1213	0.0936	0.0342	0.0571	0.0724	0.2132	0.2103	0.313	0.0269	0.0335	0.0781	0.0484	0.6657	0.0303	0.1441	0.1678	0.0262	0.0375	0.0449	0.0254	0.1477	0.1296	0.0404	0.3186	0.075	0.112	0.027	0.0379	0.1792	0.0935	0.0578	0.0549	0.1233	0.0951	0.3851	0.0727	0.1126	0.1708
8802	TAG51:5-FA18:2	Triacylglycerol	TAG Ester	54058	DMS-MS	100010206			0.2387	0.112	0.0543	0.124	0.1621	0.0422	0.0298	0.1408	0.2383	0.1239	0.0755	0.0508	0.0366	0.118	0.0726	0.3958	0.1467	0.0988	0.285	0.1385	0.1447	0.0394	0.0818	0.2603	0.1886	0.0851	0.4694	0.1074	0.1047	0.0422	0.0867	0.1402	0.0592	0.1183	0.0669	0.2586	0.0735	0.2827	0.1525	0.1238	0.1412
8803	TAG51:5-FA18:3	Triacylglycerol	TAG Ester	54416	DMS-MS	100010564			0.2688	0.1471	0.056	0.1389	0.0873	0.0322	0.026	0.1208	0.2421	0.1318	0.095	0.0382	0.0233	0.1225	0.0598	0.5079	0.1127	0.1005	0.2763	0.0949	0.0873	0.03	0.0782	0.1954	0.1724	0.0776	0.5403	0.0803	0.0822	0.0375	0.0703	0.1733	0.0604	0.0882	0.0795	0.1957	0.0894	0.3145	0.1088	0.1235	0.1483
8826	TAG52:0-FA16:0	Triacylglycerol	TAG Ester	53714	DMS-MS	100009862			8.5367	2.6566	1.3135	1.6632	1.6399	0.3664	0.614	0.8101	1.7379	2.7313	2.9968	0.2742	0.7208	0.9461	1.1459	5.2945	0.5154	7.979	4.7327	1.1341	0.7748	0.513	0.5908	5.373	1.8727	1.2704	4.9639	4.6387	2.3154	0.599	0.7653	4.418	1.9366	1.4602	0.8892	2.8388	2.4398	4.1029	2.7053	2.9647	4.4673
8828	TAG52:0-FA18:0	Triacylglycerol	TAG Ester	53892	DMS-MS	100010040			11.7875	3.5723	1.6875	2.226	1.945	0.4069	0.7341	0.9914	2.5044	3.3951	4.0691	0.3104	0.9545	1.1871	1.4917	6.433	0.663	10.7925	6.1726	1.395	1.0102	0.6718	0.8297	8.1087	2.5785	1.6822	6.2844	6.9095	3.4835	0.7482	0.9598	5.5474	2.2441	1.8239	1.0651	3.8287	3.4048	5.2195	4.0252	4.8985	6.6934
8830	TAG52:0-FA20:0	Triacylglycerol	TAG Ester	54059	DMS-MS	100010207			0.5159	0.2201	0.1755	0.1886	0.1646	0.0736	0.1058	0.0916	0.214	0.3235	0.3048	0.047	0.0745	0.1146	0.1221	0.3712	0.062	0.5249	0.5095	0.1287	0.0674	0.048	0.0685	0.5158	0.2341	0.1227	0.2927	0.2001	0.3725	0.0602	0.0911	0.3259	0.2074	0.1199	0.0965	0.2228	0.217	0.3708	0.1771	0.2843	0.3752
8837	TAG52:1-FA16:0	Triacylglycerol	TAG Ester	54417	DMS-MS	100010565			83.5346	38.2026	14.7153	21.58	17.3871	5.6713	7.0691	12.6451	15.3149	31.274	21.8144	4.7505	6.4312	10.3483	13.6226	63.0624	8.8309	63.1671	47.2646	17.9976	10.593	8.3367	10.6268	55.9363	16.9541	26.3338	59.7868	45.4017	17.2262	8.6344	12.7694	45.8608	19.082	17.2528	11.2594	41.3672	29.5812	45.8293	27.1764	24.5708	40.757
8838	TAG52:1-FA16:1	Triacylglycerol	TAG Ester	53379	DMS-MS	100009527			1.1576	0.5358	0.7194	0.4001	0.2693	0.8032	0.1954	0.4304	0.632	0.5217	0.4792	0.2131	0.2637	0.4582	0.515	0.8518	0.3788	1.9287	0.5314	0.1934	0.3974	0.3587	0.1865	1.1492	0.2962	0.3411	0.828	1.3018	0.4824	0.4251	0.4273	1.0824	0.5475	0.461	0.9852	0.4683	1.0018	0.9991	0.5979	0.5887	0.786
8840	TAG52:1-FA18:0	Triacylglycerol	TAG Ester	53715	DMS-MS	100009863			64.1143	27.5217	10.4765	14.5433	12.4565	3.3704	4.951	8.0949	12.4438	22.437	18.3465	2.8047	4.7939	7.144	9.5727	44.647	5.7097	54.8049	36.0446	11.8392	7.3226	5.3202	6.4665	44.9728	13.0579	15.8161	42.3823	35.998	13.6651	5.6949	8.2918	33.7044	13.8501	12.3717	7.7714	30.2685	21.3364	35.1353	19.2571	18.2923	31.0515
8841	TAG52:1-FA18:1	Triacylglycerol	TAG Ester	53558	DMS-MS	100009706			92.3165	52.2219	18.797	28.8822	20.3705	7.6244	9.1615	17.3159	18.051	38.3804	23.4757	6.484	7.4018	12.9082	17.289	73.0486	12.7085	64.8704	56.0171	23.3773	13.4423	11.378	14.4483	70.0459	20.7653	36.4496	71.4624	49.8005	22.5561	11.589	17.2839	52.9901	20.8733	21.1955	14.8283	53.5198	36.6943	56.3582	34.2841	30.5342	49.6345
8843	TAG52:1-FA20:0	Triacylglycerol	TAG Ester	53893	DMS-MS	100010041			0.3814	0.2446	0.1167	0.1713	0.114	0.0466	0.085	0.0689	0.1207	0.2271	0.1592	0.0433	0.053	0.0809	0.1347	0.278	0.0549	0.4739	0.2419	0.0695	0.0549	0.0203	0.0575	0.3541	0.1524	0.0677	0.2761	0.0785	0.1883	0.0335	0.0865	0.2941	0.1221	0.0725	0.0556	0.1709	0.1528	0.2748	0.2268	0.162	0.2457
8844	TAG52:1-FA20:1	Triacylglycerol	TAG Ester	53559	DMS-MS	100009707			1.2325	0.4732	0.527	0.3797	0.3825	0.3873	0.1819	0.2419	0.3786	0.8842	0.3907	0.158	0.1349	0.3362	0.4302	1.2135	0.2325	1.124	0.6153	0.19	0.1938	0.2025	0.1221	2.6224	0.3511	0.3581	0.8597	0.6639	0.3776	0.217	0.2964	0.911	0.5779	0.326	0.4704	0.3589	0.5775	1.1216	0.4235	0.419	0.6423
8851	TAG52:2-FA14:0	Triacylglycerol	TAG Ester	53716	DMS-MS	100009864			0.3309	0.3369	0.1538	0.2509	0.1363	0.0539	0.0851	0.0876	0.091	0.224	0.0927	0.0646	0.0294	0.0976	0.2176	0.3583	0.1162	0.4	0.2207	0.0702	0.051	0.0168	0.0384	0.8145	0.1543	0.1092	0.3374	0.0953	0.145	0.0294	0.1119	0.24	0.1476	0.0678	0.052	0.1925	0.1581	0.2858	0.4868	0.1748	0.2324
8854	TAG52:2-FA16:0	Triacylglycerol	TAG Ester	53717	DMS-MS	100009865			264.57	177.124	74.0605	123.109	76.6268	40.7594	40.363	82.1661	64.3661	140.1	63.3974	37.1907	29.9495	55.4991	76.1993	233.714	63.4686	164.266	190.101	107.945	63.8329	54.6046	68.6707	218.16	76.2318	154.679	233.031	155.762	80.5448	57.3633	81.4209	171.33	76.4782	84.4865	68.3877	201.322	131.888	181.234	141.119	108.336	157.101
8855	TAG52:2-FA16:1	Triacylglycerol	TAG Ester	53560	DMS-MS	100009708			8.6432	4.7208	1.8931	2.9982	1.9372	0.8569	0.6973	2.0749	1.3908	3.5778	1.539	0.9438	0.721	1.6851	1.6695	5.9193	1.5549	8.7248	4.5939	2.3291	1.5979	0.8761	1.7595	7.7569	1.9799	2.5191	7.5567	3.0211	2.1992	1.1261	2.2373	6.7033	1.5318	1.9921	2.6136	3.7868	4.7129	5.3084	3.2263	2.854	5.442
8857	TAG52:2-FA18:0	Triacylglycerol	TAG Ester	53380	DMS-MS	100009528			33.0291	10.4888	5.7146	8.6983	9.7945	2.3489	2.1803	5.9568	8.9511	12.1684	7.9286	2.1906	2.6429	5.4374	5.3875	28.4414	4.2459	31.246	20.441	7.4941	6.2659	3.8351	5.0337	28.3364	9.1464	8.5282	28.8718	16.4444	6.1419	3.055	5.464	20.4595	7.6878	9.4521	6.1522	17.9268	9.6572	21.7259	14.4518	8.7956	14.6978
8858	TAG52:2-FA18:1	Triacylglycerol	TAG Ester	53894	DMS-MS	100010042			333.237	243.5	118.281	183.177	108.339	65.3009	65.5281	123.065	98.0091	197.904	97.7015	59.3631	48.4353	85.0969	119.077	296.153	101.645	235.978	270.363	152.129	94.8855	80.7282	97.8756	282.875	113.334	207.778	298.529	215.311	123.611	93.1462	122.491	232.679	117.351	123.45	108.858	269.736	195.502	246.679	202.655	161.106	219.548
8859	TAG52:2-FA18:2	Triacylglycerol	TAG Ester	53895	DMS-MS	100010043			40.8089	14.8614	7.5234	13.8708	14.4091	4.0734	3.2968	10.4702	12.7263	16.8442	9.1862	3.87	3.5815	7.9173	8.136	40.3325	7.889	27.7616	30.3989	12.9384	11.049	7.0176	8.7252	38.7498	13.2707	16.9256	39.4866	24.2118	9.4903	4.9712	8.662	24.8097	10.3765	14.1258	8.2045	28.3049	11.0571	29.6276	22.7267	13.0748	19.4747
8861	TAG52:2-FA20:0	Triacylglycerol	TAG Ester	54060	DMS-MS	100010208			0.2395	0.1652	0.0732	0.1148	0.0959	0.0449	0.0478	0.0763	0.0948	0.1267	0.0703	0.0359	0.0341	0.0663	0.0831	0.2185	0.0652	0.2177	0.192	0.0918	0.0605	0.0435	0.0579	0.2518	0.0992	0.1152	0.2293	0.1193	0.0864	0.0389	0.0701	0.1629	0.0792	0.0707	0.0577	0.1841	0.1026	0.1904	0.1966	0.1128	0.1508
8862	TAG52:2-FA20:1	Triacylglycerol	TAG Ester	53718	DMS-MS	100009866			1.0429	0.5405	0.2802	0.4781	0.3007	0.1034	0.1352	0.1537	0.135	0.7158	0.1819	0.1472	0.0739	0.2185	0.3864	0.8683	0.1855	0.9208	0.4392	0.1567	0.1117	0.0632	0.142	2.5285	0.294	0.2194	0.9228	0.2379	0.2476	0.0894	0.2697	0.945	0.2922	0.1821	0.1789	0.3123	0.445	0.7308	0.708	0.3242	0.5759
8863	TAG52:2-FA20:2	Triacylglycerol	TAG Ester	54418	DMS-MS	100010566			1.2265	0.3471	0.2423	0.3346	0.3371	0.0894	0.116	0.1462	0.1816	0.8357	0.2465	0.1289	0.0644	0.2383	0.2064	1.1011	0.073	1.0091	0.3917	0.1226	0.1168	0.1005	0.0799	2.8653	0.3451	0.2553	0.9303	0.2464	0.1936	0.0928	0.1897	0.9047	0.4302	0.2681	0.191	0.293	0.294	0.851	0.3341	0.2782	0.5051
8866	TAG52:3-FA14:0	Triacylglycerol	TAG Ester	54061	DMS-MS	100010209			0.4521	0.3474	0.1672	0.3488	0.1951	0.0632	0.0906	0.1491	0.1157	0.3031	0.1038	0.0885	0.0439	0.1645	0.1931	0.5218	0.126	0.4903	0.3012	0.1066	0.11	0.0303	0.0563	1.3846	0.2606	0.1458	0.5507	0.1338	0.1681	0.0366	0.1504	0.4032	0.1988	0.116	0.0955	0.267	0.1648	0.4027	0.8418	0.2469	0.2741
8869	TAG52:3-FA16:0	Triacylglycerol	TAG Ester	53381	DMS-MS	100009529			239.056	117.303	57.7228	115.791	95.2299	40.1641	29.9754	94.5343	80.7346	123.287	49.919	40.7909	27.2665	64.7368	69.8304	232.066	73.5652	125.554	205.034	112.662	87.846	62.6471	74.4724	223.606	91.7614	141.544	227.15	154.397	76.5087	48.8494	78.7464	156.052	71.0386	101.351	72.7631	201.03	82.5518	177.718	158.769	100.023	133.88
8870	TAG52:3-FA16:1	Triacylglycerol	TAG Ester	53896	DMS-MS	100010044			34.1359	27.6349	9.045	18.4129	7.5241	5.5599	3.6722	13.7763	5.5084	15.6368	4.4094	6.4268	3.2574	8.7811	9.0434	24.8645	11.6033	23.0752	22.8422	16.6587	10.23	4.5929	11.5138	34.4991	9.2535	17.5328	33.3358	14.3579	11.1981	6.7546	14.4382	23.3768	6.4598	8.4622	15.8119	21.7895	23.3296	21.9609	19.0347	14.5427	23.7034
8872	TAG52:3-FA18:0	Triacylglycerol	TAG Ester	54246	DMS-MS	100010394			5.3607	1.8082	0.9144	1.6709	1.449	0.4791	0.3281	1.2329	1.458	2.0063	1.0804	0.5378	0.4291	1.2951	0.9402	4.9705	1.1221	5.1934	3.5415	1.5708	1.2596	0.5928	1.1468	4.4612	1.714	1.2073	5.4033	1.768	1.1622	0.6053	1.1002	3.9797	1.0408	1.6197	1.5495	2.5103	1.5872	3.5462	2.2027	1.4704	2.6842
8873	TAG52:3-FA18:1	Triacylglycerol	TAG Ester	54594	DMS-MS	100010742			246.887	140.621	64.6884	126.338	92.4969	43.7493	32.1454	100.85	79.7378	126.965	50.7534	44.9473	29.2302	68.1787	76.2977	229.57	82.533	142.147	208.704	119.083	89.0585	61.9776	79.4742	233.536	92.4247	144.826	236.006	155.752	83.7417	53.0239	87.7399	165.13	71.7379	99.1152	87.6181	206.492	106.73	182.18	163.074	109.934	146.388
8874	TAG52:3-FA18:2	Triacylglycerol	TAG Ester	54247	DMS-MS	100010395			220.536	109.761	53.0467	107.554	88.8673	37.118	27.0038	90.2748	76.0569	112.036	45.9212	37.4233	25.3802	60.6104	64.8352	217.894	70.3604	115.829	191.797	104.864	82.9802	58.2535	69.1038	207.833	84.9723	130.561	214.626	146.167	71.3262	44.3901	74.8304	143.634	64.7338	92.7657	66.672	189.716	79.0207	166.909	147.273	94.0339	121.506
8875	TAG52:3-FA18:3	Triacylglycerol	TAG Ester	53897	DMS-MS	100010045			4.6145	1.988	0.7204	1.4258	0.9732	0.3709	0.2973	1.0543	1.4782	1.8374	1.2036	0.4065	0.3576	1.0085	0.7881	6.0474	1.2575	3.0634	3.0434	1.5279	0.8915	0.478	0.9052	2.9138	1.5736	1.2226	4.7679	1.4613	0.8686	0.6367	0.6861	2.7898	1.2165	1.328	1.2082	2.2364	1.3572	3.9493	1.5407	1.3247	1.8326
8876	TAG52:3-FA20:0	Triacylglycerol	TAG Ester	53561	DMS-MS	100009709			0.9226	0.3869	0.1858	0.3708	0.3319	0.1205	0.0932	0.3257	0.2672	0.4195	0.1507	0.1333	0.0892	0.2122	0.2278	0.9164	0.2508	0.4253	0.7308	0.3832	0.2926	0.1942	0.2634	0.9573	0.3261	0.4892	0.9627	0.561	0.2655	0.1405	0.2545	0.5526	0.2282	0.3423	0.2327	0.7427	0.2537	0.6718	0.5908	0.3341	0.4513
8877	TAG52:3-FA20:1	Triacylglycerol	TAG Ester	53562	DMS-MS	100009710			0.367	0.1965	0.1069	0.2224	0.1608	0.056	0.0598	0.1122	0.1067	0.2173	0.0684	0.0738	0.043	0.1173	0.1585	0.3562	0.1255	0.2903	0.2568	0.1322	0.1	0.053	0.0877	0.8869	0.1589	0.1483	0.4006	0.1494	0.1315	0.0517	0.1289	0.2651	0.1236	0.1065	0.1017	0.2389	0.1479	0.3042	0.4599	0.1647	0.2036
8878	TAG52:3-FA20:2	Triacylglycerol	TAG Ester	54248	DMS-MS	100010396			1.3416	0.5482	0.3037	0.5931	0.3579	0.1346	0.1403	0.2851	0.2248	0.828	0.1974	0.1883	0.0878	0.3394	0.2897	1.056	0.1721	1.1273	0.5751	0.2747	0.2155	0.1178	0.1826	3.1057	0.4137	0.3265	1.2671	0.332	0.267	0.1189	0.3095	1.2277	0.3568	0.2907	0.3158	0.5239	0.4879	0.8414	0.9695	0.4458	0.6163
8879	TAG52:3-FA20:3	Triacylglycerol	TAG Ester	54595	DMS-MS	100010743			2.2122	0.7957	0.5208	0.6253	0.6709	0.1636	0.188	0.3966	0.4884	1.6703	0.6766	0.21	0.1332	0.4532	0.3202	3.0002	0.1217	1.6603	0.8158	0.2208	0.209	0.2211	0.11	2.5198	0.5225	0.3353	2.0391	0.4297	0.3458	0.1723	0.2301	2.1478	0.8311	0.5659	0.4542	0.5983	0.8097	2.2498	0.5308	0.5949	0.9045
8880	TAG52:3-FA22:1	Triacylglycerol	TAG Ester	53719	DMS-MS	100009867			0.2052	0.0987	0.044	0.0962	0.0754	0.0316	0.0265	0.0693	0.062	0.0887	0.0385	0.0302	0.0264	0.0513	0.0713	0.2039	0.0733	0.1124	0.1599	0.087	0.0682	0.0433	0.0544	0.2081	0.0715	0.1089	0.196	0.1208	0.0534	0.0413	0.0634	0.124	0.0543	0.0754	0.0592	0.1606	0.0687	0.147	0.1477	0.0794	0.1029
8882	TAG52:4-FA14:0	Triacylglycerol	TAG Ester	54596	DMS-MS	100010744			0.6109	0.4444	0.2118	0.4264	0.2497	0.0753	0.1073	0.2139	0.1818	0.3862	0.1982	0.1008	0.0471	0.2074	0.1444	0.8931	0.1248	0.6049	0.3731	0.0975	0.1488	0.0363	0.0566	1.2028	0.3162	0.1264	0.7532	0.1263	0.1885	0.0392	0.1343	0.5914	0.2671	0.1579	0.1589	0.3445	0.2025	0.5851	0.9493	0.3109	0.3379
8885	TAG52:4-FA16:0	Triacylglycerol	TAG Ester	54249	DMS-MS	100010397			97.7165	31.4506	17.1461	38.9898	48.45	13.8881	7.6267	39.77	41.8319	42.3338	16.2664	15.6265	8.5957	28.4966	22.8245	117.906	33.3217	39.9566	93.231	48.7774	46.2141	25.4733	32.5534	100.109	44.5508	47.8649	106.934	62.6949	26.4622	15.3359	27.2482	62.5604	24.4391	48.8388	28.821	79.8993	22.4865	77.2432	66.3587	35.0924	43.1349
8886	TAG52:4-FA16:1	Triacylglycerol	TAG Ester	54062	DMS-MS	100010210			26.8794	14.6522	5.8709	15.441	8.9846	5.2675	2.3612	15.5308	6.2733	11.4501	3.0428	6.3172	2.6136	9.256	8.0325	22.4275	12.4078	14.5352	24.8619	17.7971	14.3474	4.8499	11.4641	33.4093	9.6132	14.7041	30.113	13.4694	9.6004	5.2184	12.6591	18.762	5.6083	9.5281	15.1894	21.713	11.1295	18.0589	20.3744	12.184	16.7671
8888	TAG52:4-FA18:0	Triacylglycerol	TAG Ester	53382	DMS-MS	100009530			0.5865	0.2438	0.1012	0.2324	0.1694	0.0612	0.0475	0.1597	0.184	0.2347	0.1504	0.0606	0.0488	0.1858	0.1076	0.7094	0.1652	0.579	0.3587	0.1644	0.1464	0.0478	0.1219	0.3819	0.2066	0.1069	0.5802	0.1408	0.1496	0.0741	0.1073	0.4259	0.1451	0.1742	0.2163	0.2749	0.1696	0.4673	0.2626	0.1686	0.2697
8889	TAG52:4-FA18:1	Triacylglycerol	TAG Ester	53898	DMS-MS	100010046			48.4218	24.702	8.6605	21.0342	12.9349	7.056	3.9109	19.2502	12.1602	19.6654	6.5106	8.5351	3.9659	13.8691	11.6131	47.5576	18.8337	24.0553	38.4927	26.3003	17.3602	7.2555	16.0479	47.5208	16.9083	20.994	52.267	20.3958	13.5112	8.4617	16.3307	30.9352	9.4358	15.4302	20.9319	33.1256	17.1048	34.0701	26.1434	17.8261	25.5995
8890	TAG52:4-FA18:2	Triacylglycerol	TAG Ester	54597	DMS-MS	100010745			134.628	43.8876	25.4935	62.7124	76.0944	23.4537	11.1945	66.7329	61.8411	61.0842	21.3228	26.1167	13.849	45.575	36.5833	145.815	49.6169	57.8844	134.507	73.5032	72.8963	38.6538	47.4509	146.709	63.1692	73.2125	147.733	93.9468	43.1131	22.5447	46.6357	88.9655	35.2839	69.3653	47.1996	122.555	34.1145	105.601	103.946	53.7819	65.6085
8891	TAG52:4-FA18:3	Triacylglycerol	TAG Ester	54419	DMS-MS	100010567			34.5396	16.6067	5.2148	12.4363	7.3358	3.3946	2.456	9.5357	10.3506	14.0944	7.1701	3.7305	2.6077	8.1354	6.4231	46.1993	11.2115	14.8921	24.0021	13.8922	7.5529	4.0946	7.9843	22.0394	11.43	11.3661	33.7036	11.1311	6.5949	5.6869	6.3097	19.6974	8.7066	10.0926	10.2752	19.097	10.563	28.7228	12.9144	10.4302	13.3748
8892	TAG52:4-FA20:0	Triacylglycerol	TAG Ester	53383	DMS-MS	100009531			0.7889	0.258	0.1396	0.3272	0.4342	0.1264	0.07	0.3311	0.3524	0.346	0.1296	0.1321	0.0868	0.2414	0.1973	0.9726	0.2736	0.3483	0.7924	0.4037	0.4071	0.2033	0.2822	0.8433	0.3875	0.3985	0.94	0.5228	0.2214	0.128	0.2295	0.5055	0.1963	0.4096	0.2318	0.6858	0.1832	0.6314	0.5737	0.2809	0.3627
8894	TAG52:4-FA20:2	Triacylglycerol	TAG Ester	53899	DMS-MS	100010047			0.323	0.1701	0.1079	0.2038	0.1588	0.0585	0.0623	0.1416	0.1131	0.2034	0.0755	0.0765	0.0478	0.1338	0.1128	0.3215	0.0996	0.2906	0.2509	0.1238	0.1374	0.0507	0.0817	0.8755	0.1872	0.1316	0.3808	0.1355	0.1075	0.052	0.1176	0.2898	0.1155	0.1191	0.1267	0.2323	0.1459	0.2668	0.4682	0.1672	0.1883
8895	TAG52:4-FA20:3	Triacylglycerol	TAG Ester	53900	DMS-MS	100010048			2.178	1.0565	0.5259	0.9659	0.6456	0.228	0.2	0.607	0.4324	1.4322	0.4824	0.2726	0.1481	0.5394	0.3832	2.4134	0.2167	1.6867	0.9258	0.3679	0.3256	0.1731	0.1882	2.635	0.5684	0.3114	2.3022	0.402	0.3553	0.1973	0.3114	2.6112	0.653	0.5291	0.6987	0.8215	1.1628	1.8822	1.3278	0.7452	0.9547
8896	TAG52:4-FA20:4	Triacylglycerol	TAG Ester	53563	DMS-MS	100009711			6.3445	2.0139	1.7462	1.5972	1.8421	0.452	0.6627	0.882	1.7324	4.0849	3.2456	0.3159	0.3414	0.9888	0.6761	13.5999	0.3137	4.2667	2.6509	0.5168	0.4757	0.9429	0.2947	3.3774	1.266	0.5411	4.1384	1.3404	0.9607	0.3988	0.4079	3.8379	2.8172	1.2168	1.7257	1.6629	1.6935	7.6024	1.18	1.4848	2.0244
8897	TAG52:4-FA22:1	Triacylglycerol	TAG Ester	54598	DMS-MS	100010746			0.2724	0.1121	0.0493	0.1231	0.0995	0.0463	0.0247	0.1064	0.0915	0.1194	0.0485	0.0433	0.0294	0.0867	0.0633	0.2972	0.1013	0.1348	0.2315	0.1318	0.1153	0.0562	0.0981	0.2715	0.1093	0.1163	0.3275	0.1375	0.0806	0.0507	0.0882	0.1805	0.0635	0.1113	0.1022	0.2045	0.0836	0.2213	0.1668	0.0979	0.1346
8898	TAG52:4-FA22:4	Triacylglycerol	TAG Ester	53384	DMS-MS	100009532			0.2995	0.1268	0.0894	0.1252	0.104	0.0333	0.0492	0.0581	0.0735	0.1985	0.1234	0.0325	0.0182	0.0729	0.055	0.4649	0.0353	0.2793	0.1339	0.0419	0.0514	0.0266	0.0324	0.2994	0.1152	0.0448	0.2689	0.0696	0.0712	0.0219	0.036	0.2567	0.1101	0.06	0.0539	0.1313	0.064	0.2809	0.2285	0.0992	0.1197
8900	TAG52:5-FA14:0	Triacylglycerol	TAG Ester	53901	DMS-MS	100010049			0.6857	0.4823	0.2339	0.4048	0.2808	0.0849	0.1308	0.2404	0.2278	0.4043	0.2808	0.0836	0.052	0.2159	0.1508	1.3561	0.1495	0.5836	0.4185	0.0867	0.1594	0.0419	0.0443	0.7136	0.2886	0.0916	0.736	0.1157	0.1998	0.0463	0.0953	0.5826	0.3012	0.1634	0.1804	0.3393	0.2012	0.8264	0.8035	0.3099	0.2895
8903	TAG52:5-FA16:0	Triacylglycerol	TAG Ester	54250	DMS-MS	100010398			15.2845	4.4939	2.0511	4.5569	4.2053	1.4147	0.8676	4.2316	6.6418	6.082	2.8563	1.8112	1.0102	4.3073	2.5575	24.5952	6.1875	5.9263	11.7344	6.239	4.3107	1.9021	3.8543	10.6701	6.1483	4.1481	18.279	4.65	2.9494	2.096	2.5568	9.2083	3.1963	5.8679	4.9699	7.9455	3.5836	13.0961	5.6268	4.1038	5.0994
8904	TAG52:5-FA16:1	Triacylglycerol	TAG Ester	54063	DMS-MS	100010211			9.577	3.9196	1.661	4.9757	4.236	1.8272	0.6692	6.214	3.1348	3.8641	1.2385	2.3525	0.8745	4.1516	2.5961	9.4805	5.0265	4.6043	9.6419	6.7275	6.8654	1.6886	4.3386	11.4692	4.1617	4.1457	11.2345	4.3318	3.1118	1.7101	4.0485	7.093	2.0336	4.0259	6.2042	7.3066	2.8241	7.1743	6.7475	3.9935	5.0157
8907	TAG52:5-FA18:1	Triacylglycerol	TAG Ester	54420	DMS-MS	100010568			4.8443	2.8499	0.8954	2.1602	1.2401	0.6663	0.4105	1.9924	1.3664	1.9616	0.8709	0.8009	0.3705	1.74	1.155	6.1129	2.3714	2.5035	3.5783	2.3469	1.888	0.4541	1.6412	3.6704	1.8271	1.4673	4.9408	1.3006	1.3301	0.8874	1.397	2.9943	1.0737	1.4455	2.6843	2.9705	1.6539	4.0436	2.1195	1.7162	2.2856
8908	TAG52:5-FA18:2	Triacylglycerol	TAG Ester	54251	DMS-MS	100010399			20.2361	6.59	3.0912	9.0773	8.7506	3.2423	1.283	11.2112	9.2188	8.0338	2.7058	4.3273	1.7672	8.1272	5.0812	24.5142	10.6231	8.3935	21.325	13.3135	13.1897	3.6509	8.3616	22.7926	9.9616	8.5558	26.0986	9.6291	5.8348	3.2415	7.0124	13.6406	4.2618	9.7138	10.0968	16.0245	5.0922	15.8541	13.4859	7.6433	9.3534
8909	TAG52:5-FA18:3	Triacylglycerol	TAG Ester	53720	DMS-MS	100009868			19.7506	6.8543	2.6631	7.1933	5.0545	2.0201	1.1356	6.8215	8.5737	7.4496	3.7584	2.5664	1.3763	5.879	3.587	27.9879	8.1656	7.6049	15.6596	8.6866	5.9676	2.2893	5.1606	13.2617	7.9477	5.6874	22.157	6.0214	3.7558	2.9839	3.7771	11.164	4.7848	7.1117	7.6859	11.0369	5.2607	15.9633	8.0018	6.1805	6.997
8913	TAG52:5-FA20:3	Triacylglycerol	TAG Ester	53902	DMS-MS	100010050			0.4435	0.2862	0.1498	0.3288	0.2157	0.0686	0.0657	0.2504	0.1936	0.3153	0.1301	0.0877	0.0485	0.1957	0.123	0.6155	0.1006	0.3838	0.2925	0.131	0.1389	0.0396	0.0508	0.6618	0.2178	0.0902	0.5698	0.1049	0.1206	0.0523	0.0979	0.4899	0.1941	0.1421	0.226	0.3036	0.2832	0.4898	0.6082	0.2588	0.2352
8914	TAG52:5-FA20:4	Triacylglycerol	TAG Ester	53721	DMS-MS	100009869			5.6568	2.3982	1.4837	2.0346	1.5367	0.5167	0.645	1.1608	1.3851	3.059	2.2508	0.3658	0.3098	1.0077	0.6652	9.2064	0.3624	3.7929	2.2077	0.5484	0.5067	0.5653	0.3277	3.0926	1.0788	0.365	4.0273	0.8306	0.8166	0.3562	0.4244	4.1589	1.8215	0.9675	2.0369	1.6127	1.8452	5.2982	2.1498	1.5633	2.0339
8915	TAG52:5-FA20:5	Triacylglycerol	TAG Ester	53722	DMS-MS	100009870			1.91	0.3172	0.2567	0.265	0.5212	0.1161	0.1104	0.2683	0.3445	0.6988	0.4821	0.0615	0.0862	0.4358	0.2145	4.5609	0.3744	0.845	0.9823	0.1346	0.5174	0.1098	0.055	0.3292	0.2007	0.1258	0.9372	0.135	0.5583	0.1097	0.0735	0.8501	0.3462	0.3115	0.3438	0.3427	0.5105	3.0748	0.2226	0.237	0.3319
8917	TAG52:5-FA22:5	Triacylglycerol	TAG Ester	53385	DMS-MS	100009533			0.9405	0.3218	0.195	0.374	0.2704	0.0847	0.1045	0.1846	0.2474	0.7373	0.2265	0.0976	0.0532	0.2896	0.1604	1.6039	0.2212	0.631	0.5154	0.1762	0.1812	0.0688	0.1301	0.658	0.3106	0.1684	0.8583	0.1757	0.2344	0.077	0.1148	0.7183	0.247	0.227	0.1932	0.3811	0.2106	0.9172	0.5535	0.2364	0.3209
8919	TAG52:6-FA14:0	Triacylglycerol	TAG Ester	54421	DMS-MS	100010569			0.561	0.2235	0.1344	0.2488	0.1903	0.0629	0.0758	0.1343	0.1665	0.3024	0.1734	0.0407	0.0349	0.1733	0.1044	1.2296	0.1577	0.3544	0.3392	0.0476	0.1474	0.0306	0.0332	0.3184	0.1843	0.0526	0.4064	0.0583	0.1547	0.0322	0.0602	0.3771	0.1867	0.124	0.1136	0.2	0.1217	0.6205	0.4275	0.1636	0.1604
8922	TAG52:6-FA16:0	Triacylglycerol	TAG Ester	54599	DMS-MS	100010747			1.8742	0.5167	0.206	0.4648	0.3539	0.1104	0.0938	0.3093	0.6701	0.6837	0.4118	0.1122	0.0854	0.516	0.2371	3.6449	0.7492	0.9119	1.0273	0.4496	0.3349	0.0906	0.2003	0.6071	0.5547	0.2239	1.5786	0.219	0.3608	0.1937	0.1457	0.9474	0.4022	0.422	0.4946	0.5116	0.5379	1.6842	0.4149	0.3607	0.4312
8923	TAG52:6-FA16:1	Triacylglycerol	TAG Ester	53386	DMS-MS	100009534			1.7928	0.6069	0.236	0.7258	0.4738	0.2518	0.1065	0.7855	0.6022	0.7109	0.2655	0.3445	0.1394	0.7955	0.3728	2.1694	1.028	0.8135	1.5222	0.9671	0.7971	0.1636	0.6098	1.4191	0.671	0.4301	1.9798	0.4165	0.4311	0.2892	0.4955	1.3028	0.3478	0.618	1.2495	0.8685	0.5121	1.4731	0.6895	0.5716	0.7545
8925	TAG52:6-FA18:1	Triacylglycerol	TAG Ester	54422	DMS-MS	100010570			0.4042	0.2893	0.0954	0.2065	0.1402	0.0597	0.0561	0.2154	0.182	0.2123	0.1324	0.065	0.0488	0.2082	0.163	0.671	0.357	0.2538	0.346	0.1832	0.2283	0.041	0.0942	0.1998	0.1544	0.1098	0.3553	0.0835	0.1991	0.0794	0.0776	0.2278	0.1109	0.1309	0.2167	0.3462	0.1635	0.4829	0.3057	0.1544	0.1689
8926	TAG52:6-FA18:2	Triacylglycerol	TAG Ester	53387	DMS-MS	100009535			2.0842	0.7933	0.3294	0.9109	0.8507	0.2959	0.1347	1.1181	0.9965	0.7851	0.4053	0.3969	0.1631	0.9703	0.4961	3.1609	1.3152	0.8534	1.9842	1.1907	1.3343	0.2254	0.7362	1.6572	0.9885	0.6092	2.4726	0.5729	0.5479	0.3397	0.5741	1.3104	0.5052	0.8448	1.2945	1.4585	0.5047	1.8594	1.1408	0.7421	0.8635
8927	TAG52:6-FA18:3	Triacylglycerol	TAG Ester	54064	DMS-MS	100010212			2.8445	1.0132	0.3355	1.0493	0.6405	0.3388	0.1457	1.192	1.4441	1.0687	0.478	0.4786	0.2011	1.1774	0.5467	4.0098	2.0393	1.1252	2.4139	1.64	1.061	0.2433	0.8857	2.0198	1.247	0.6727	3.841	0.6488	0.5426	0.4801	0.6504	1.8185	0.5864	1.0267	1.7806	1.4264	1.0876	2.2834	1.0689	0.8568	1.0936
8931	TAG52:6-FA20:4	Triacylglycerol	TAG Ester	54065	DMS-MS	100010213			1.089	0.6898	0.4682	0.6152	0.5592	0.1663	0.2093	0.496	0.6528	0.7077	0.6821	0.1353	0.1033	0.3704	0.2129	2.4306	0.1889	0.902	0.7993	0.209	0.2361	0.1359	0.0869	0.8063	0.4292	0.108	1.0864	0.2229	0.2544	0.083	0.1398	0.8199	0.5362	0.2979	0.5955	0.6376	0.4915	1.3994	1.0667	0.5636	0.5417
8932	TAG52:6-FA20:5	Triacylglycerol	TAG Ester	53723	DMS-MS	100009871			1.6893	0.4114	0.2151	0.3245	0.4327	0.1305	0.103	0.3456	0.2969	0.5466	0.3693	0.0643	0.0786	0.4206	0.2387	3.3394	0.4771	0.8473	0.8444	0.1513	0.5568	0.0643	0.0621	0.2948	0.1822	0.0771	0.9733	0.0812	0.4842	0.1031	0.0704	0.9805	0.2513	0.2485	0.4529	0.3594	0.5522	2.2786	0.4219	0.2979	0.3461
8935	TAG52:6-FA22:6	Triacylglycerol	TAG Ester	54252	DMS-MS	100010400			1.7628	0.3939	0.2447	0.5772	0.3579	0.1389	0.1511	0.1392	0.1939	1.0189	0.2872	0.0549	0.0587	0.4158	0.2453	3.6238	0.3972	0.8349	0.6312	0.0495	0.2368	0.0383	0.0735	0.7221	0.3758	0.0945	0.7173	0.064	0.4109	0.0675	0.1384	1.0753	0.4778	0.326	0.1283	0.2902	0.1973	1.475	0.8831	0.2092	0.269
8939	TAG52:7-FA16:0	Triacylglycerol	TAG Ester	53564	DMS-MS	100009712			1.6373	0.7283	0.3241	0.3954	0.3752	0.0667	0.1256	0.1442	0.6417	0.6316	0.8254	0.0548	0.1209	0.2514	0.1991	1.6851	0.0975	1.6839	1.0416	0.1707	0.1234	0.0779	0.1037	0.9953	0.5414	0.1579	1.4598	0.5922	0.7182	0.0726	0.1522	0.8211	0.3726	0.2518	0.1256	0.5521	0.5848	1.34	0.2666	0.6892	1.2274
8941	TAG52:7-FA18:1	Triacylglycerol	TAG Ester	54423	DMS-MS	100010571			0.5108	0.419	0.1434	0.1959	0.1392	0.0481	0.0671	0.1066	0.265	0.2805	0.2563	0.0339	0.0438	0.1212	0.1193	0.672	0.1467	0.4555	0.3655	0.0669	0.0824	0.054	0.0631	0.3928	0.1949	0.1081	0.6889	0.1945	0.2396	0.0458	0.1059	0.3455	0.1254	0.1306	0.0693	0.2758	0.2169	0.5188	0.2777	0.2157	0.4178
8947	TAG52:7-FA20:5	Triacylglycerol	TAG Ester	54066	DMS-MS	100010214			0.3852	0.1255	0.0772	0.1061	0.1759	0.0465	0.0392	0.1566	0.1521	0.1423	0.1237	0.0289	0.0325	0.1746	0.09	0.8742	0.2308	0.2195	0.3191	0.063	0.2891	0.0184	0.018	0.0884	0.0835	0.0278	0.2759	0.0309	0.1548	0.0284	0.0267	0.2095	0.083	0.0801	0.1517	0.1484	0.1549	0.6157	0.2096	0.1083	0.0965
8950	TAG52:7-FA22:6	Triacylglycerol	TAG Ester	54600	DMS-MS	100010748			0.7338	0.2176	0.0951	0.3175	0.1391	0.095	0.1044	0.0811	0.0809	0.4217	0.1126	0.0278	0.0366	0.2049	0.2709	0.9737	0.4981	0.4253	0.2752	0.0258	0.1364	0.0188	0.0369	0.3301	0.1429	0.0536	0.2881	0.0377	0.2828	0.038	0.0828	0.5473	0.2078	0.1227	0.069	0.1358	0.1223	0.522	1.1687	0.1117	0.1163
8954	TAG52:8-FA16:1	Triacylglycerol	TAG Ester	53388	DMS-MS	100009536			0.3151	0.1346	0.0551	0.0888	0.0777	0.0229	0.0215	0.0427	0.0958	0.1338	0.1075	0.0179	0.0277	0.064	0.0396	0.2926	0.0264	0.3691	0.1367	0.0313	0.0315	0.015	0.0289	0.224	0.0885	0.0302	0.3213	0.0635	0.0912	0.0219	0.0502	0.2285	0.0581	0.0549	0.0449	0.0857	0.139	0.2473	0.0544	0.0869	0.2089
8955	TAG52:8-FA18:2	Triacylglycerol	TAG Ester	53724	DMS-MS	100009872			0.2283	0.1166	0.0571	0.0982	0.1014	0.0279	0.0268	0.0583	0.1812	0.1206	0.1024	0.0219	0.0265	0.0786	0.0515	0.3562	0.0817	0.1761	0.2063	0.0434	0.0666	0.0321	0.0356	0.2159	0.1205	0.0542	0.3789	0.0962	0.0814	0.0182	0.0547	0.1634	0.0626	0.0895	0.036	0.1521	0.0716	0.2632	0.1924	0.0927	0.1615
8970	TAG53:0-FA16:0	Triacylglycerol	TAG Ester	54601	DMS-MS	100010749			1.9475	0.4329	0.2516	0.4275	0.6317	0.1666	0.0993	0.4433	0.4544	0.808	0.3947	0.0888	0.1373	0.5596	0.3127	3.2298	0.5442	0.8502	1.2635	0.3304	0.9231	0.1687	0.1478	0.6585	0.3243	0.1781	1.107	0.4136	0.5488	0.18	0.1735	1.0784	0.3712	0.4508	0.4257	0.6165	0.4778	1.8307	0.4108	0.3515	0.4941
8980	TAG53:1-FA16:0	Triacylglycerol	TAG Ester	54602	DMS-MS	100010750			1.9909	1.0909	0.2695	0.3153	0.4923	0.0749	0.1225	0.1776	0.4791	0.5394	0.4964	0.0617	0.1327	0.2315	0.2915	1.4282	0.1478	1.9076	0.9477	0.3655	0.1785	0.082	0.0932	0.9609	0.3625	0.2115	0.8641	0.9659	0.38	0.0953	0.15	0.5473	0.4279	0.2071	0.1415	1.3161	0.7226	1.224	0.4841	0.4818	0.7663
8982	TAG53:1-FA17:0	Triacylglycerol	TAG Ester	53725	DMS-MS	100009873			1.1669	1.0425	0.3764	0.54	0.3346	0.1146	0.1382	0.2869	0.7896	0.5219	0.578	0.089	0.1839	0.2912	0.2441	1.1831	0.1864	1.0632	0.9441	0.2244	0.2071	0.1183	0.1853	0.8762	0.445	0.3617	1.6636	0.8119	0.5384	0.138	0.3009	0.6523	0.264	0.268	0.1322	0.9811	0.6546	1.1428	0.4418	0.6056	1.1754
8983	TAG53:1-FA18:0	Triacylglycerol	TAG Ester	54424	DMS-MS	100010572			1.2535	0.9078	0.3415	0.4341	0.3261	0.0848	0.1107	0.2174	0.7545	0.4392	0.6376	0.056	0.1584	0.2628	0.2265	1.1031	0.1259	1.2289	0.9178	0.1839	0.1721	0.0998	0.1548	0.9272	0.4598	0.2477	1.4504	0.888	0.5742	0.0912	0.2169	0.6278	0.2588	0.2499	0.1218	0.872	0.6006	1.0924	0.3699	0.6458	1.1728
8984	TAG53:1-FA18:1	Triacylglycerol	TAG Ester	54603	DMS-MS	100010751			2.3561	2.1969	0.6216	0.8498	0.642	0.189	0.24	0.5182	1.1658	0.913	0.8761	0.1364	0.2815	0.5292	0.4842	2.0808	0.3715	1.941	1.7149	0.5085	0.3628	0.2084	0.2968	1.7118	0.781	0.6222	2.4231	1.4274	0.9985	0.2076	0.5013	1.0399	0.5034	0.4323	0.2631	1.9982	1.2446	2.0642	0.8471	1.0373	1.9112
8994	TAG53:2-FA16:0	Triacylglycerol	TAG Ester	54253	DMS-MS	100010401			3.2986	1.722	0.5924	0.8656	1.2883	0.183	0.2822	0.4142	0.8425	1.2221	0.793	0.1589	0.2325	0.4692	0.8272	2.844	0.251	2.2626	1.6101	0.8935	0.3753	0.2415	0.274	2.7223	0.7567	0.611	2.2154	2.5787	0.6058	0.2227	0.4444	1.2236	0.8629	0.4875	0.3216	3.3211	1.9267	2.8509	1.1802	0.8465	1.4739
8996	TAG53:2-FA17:0	Triacylglycerol	TAG Ester	54254	DMS-MS	100010402			4.2433	5.842	1.8106	3.034	1.484	0.7409	0.7022	1.9208	2.892	2.5628	1.5822	0.5548	0.8062	1.5189	1.3177	5.735	1.1997	2.8395	4.5294	1.4833	1.2753	0.7468	1.1731	4.0682	1.9779	2.6964	7.424	3.5736	2.1917	0.7932	1.9494	2.5198	1.181	1.2523	0.7871	5.4777	3.4086	5.0485	2.6019	2.3854	4.3447
8997	TAG53:2-FA18:0	Triacylglycerol	TAG Ester	53726	DMS-MS	100009874			1.1567	0.9102	0.5475	0.66	0.6034	0.3735	0.3817	0.5184	0.9535	0.7021	0.6786	0.3567	0.4254	0.5504	0.5003	1.1979	0.4427	1.1196	1.0641	0.4719	0.4933	0.3948	0.4657	1.1047	0.6712	0.534	1.5492	0.9493	0.6102	0.3729	0.5022	0.7758	0.4923	0.5203	0.4079	1.1076	0.8041	1.2177	0.689	0.6858	1.1028
8998	TAG53:2-FA18:1	Triacylglycerol	TAG Ester	54425	DMS-MS	100010573			9.624	12.3691	3.5706	5.6773	3.1736	1.4093	1.3603	3.5297	5.1115	4.9067	3.3374	1.0512	1.4769	2.8581	3.016	10.9072	2.2819	6.0572	8.4901	3.2012	2.3937	1.5201	2.3193	9.0831	3.8324	4.8509	13.8695	7.6164	4.3167	1.5199	3.7133	5.1348	2.4547	2.4301	1.7208	11.2412	7.2239	10.3626	4.9846	4.7636	8.7267
8999	TAG53:2-FA18:2	Triacylglycerol	TAG Ester	53727	DMS-MS	100009875			0.9062	0.5809	0.256	0.4112	0.4604	0.1052	0.0938	0.3014	0.7733	0.4216	0.3594	0.0796	0.1422	0.3256	0.2331	1.1257	0.2166	0.8313	0.9295	0.2975	0.2837	0.1264	0.1777	0.8813	0.4618	0.284	1.3019	0.7289	0.3543	0.0919	0.2493	0.4755	0.2539	0.299	0.1501	1.0041	0.4665	1.1457	0.5241	0.3831	0.672
9008	TAG53:3-FA16:0	Triacylglycerol	TAG Ester	54255	DMS-MS	100010403			1.8179	0.7389	0.3572	0.519	1.1446	0.1359	0.1415	0.3193	0.622	0.7787	0.4166	0.1281	0.1372	0.3673	0.4992	1.9235	0.2286	1.059	1.1199	0.7474	0.3383	0.1984	0.2089	1.9155	0.556	0.4277	1.5439	1.6227	0.3384	0.1488	0.2963	0.8132	0.5027	0.4156	0.2485	2.3212	1.1026	1.9601	0.8141	0.5067	0.7882
9010	TAG53:3-FA17:0	Triacylglycerol	TAG Ester	54067	DMS-MS	100010215			3.6288	3.2096	1.268	2.7495	1.8453	0.7742	0.522	2.191	3.2964	2.0018	1.1925	0.578	0.7249	1.751	1.2585	5.4114	1.4093	2.0695	4.8689	1.7405	1.8053	0.8802	1.349	4.2379	2.3408	2.3964	6.842	3.4985	1.991	0.67	1.9122	2.1563	1.0713	1.4714	0.8786	5.5627	1.8866	4.4212	2.996	1.999	3.1737
9011	TAG53:3-FA18:0	Triacylglycerol	TAG Ester	53728	DMS-MS	100009876			6.2237	6.2476	6.068	5.9335	5.8668	6.0353	6.0556	6.0382	6.1695	6.1492	6.4635	5.6905	5.9461	6.12	6.1536	6.258	6.0543	5.7163	6.5347	5.7666	6.0608	5.7679	6.4054	6.268	5.8464	6.2126	6.0798	6.3543	5.9696	5.798	6.0548	5.8797	5.9326	5.8841	5.4583	6.5192	6.3347	6.0943	6.0767	5.8427	6.1335
9012	TAG53:3-FA18:1	Triacylglycerol	TAG Ester	53389	DMS-MS	100009537			10.6118	11.8924	6.5778	8.828	6.944	5.3285	5.1217	7.3931	8.3744	7.8108	6.2343	4.9766	5.2564	6.6069	6.7651	12.0481	6.7014	7.9629	11.6132	7.102	6.761	5.2347	6.4268	11.7334	7.177	7.9356	14.6857	10.1794	7.372	5.2594	7.3262	7.7037	5.7119	6.1525	5.7313	14.6285	9.3037	11.4955	9.0063	7.6567	10.425
9013	TAG53:3-FA18:2	Triacylglycerol	TAG Ester	53390	DMS-MS	100009538			3.9642	3.4294	1.3	2.7067	2.2847	0.7233	0.4977	2.1841	3.3325	2.113	1.2765	0.5561	0.6927	1.8201	1.3758	5.6622	1.3453	2.3764	5.0214	1.9033	1.8722	0.87	1.3214	4.8342	2.43	2.1741	7.1353	4.0767	2.0038	0.6106	1.8557	2.347	1.166	1.5804	0.9472	6.0018	2.1409	5.1512	3.0115	2.1554	3.3155
9021	TAG53:4-FA16:0	Triacylglycerol	TAG Ester	53391	DMS-MS	100009539			0.5354	0.2167	0.1159	0.1865	0.3297	0.0511	0.0445	0.1218	0.249	0.3153	0.1612	0.0565	0.053	0.1568	0.1366	0.7785	0.1052	0.3421	0.4165	0.2514	0.118	0.0709	0.0661	0.4705	0.1735	0.1159	0.5706	0.2737	0.1161	0.0592	0.0927	0.3089	0.1462	0.1618	0.1005	0.5844	0.3702	0.6173	0.2029	0.1616	0.2434
9023	TAG53:4-FA17:0	Triacylglycerol	TAG Ester	54426	DMS-MS	100010574			1.2138	0.7945	0.3738	0.8672	0.8922	0.2842	0.1493	0.8789	1.5798	0.6812	0.4271	0.2399	0.2627	0.8036	0.4345	2.1748	0.6108	0.6533	2.0209	0.6921	0.8951	0.3375	0.4988	1.4325	1.0483	0.6634	2.6346	1.1937	0.6555	0.224	0.6101	0.7838	0.382	0.6256	0.3472	1.8605	0.4848	1.7095	1.0752	0.6434	0.9271
9024	TAG53:4-FA18:0	Triacylglycerol	TAG Ester	53565	DMS-MS	100009713			0.9132	0.8946	0.8395	0.8525	0.8638	0.8427	0.8208	0.87	0.8626	0.8764	0.9267	0.8429	0.8619	0.8658	0.8516	0.9	0.8665	0.8758	0.9515	0.8395	0.8742	0.8148	0.8538	0.8572	0.8591	0.8973	0.8705	0.8936	0.8257	0.8193	0.8787	0.8619	0.9041	0.8379	0.8076	0.9242	0.8795	0.8851	0.8695	0.8601	0.8904
9025	TAG53:4-FA18:1	Triacylglycerol	TAG Ester	53392	DMS-MS	100009540			14.2884	14.4259	13.0504	13.5304	13.6416	12.6478	12.7679	13.2676	13.3889	13.6274	13.4294	12.2966	12.7698	13.1295	13.4084	14.5664	13.726	13.6823	15.2055	13.3671	13.5168	12.3451	12.5453	14.7088	13.2958	13.6469	15.03	14.305	13.0798	12.342	13.6674	13.194	12.6318	12.7602	13.9886	15.7533	13.6159	14.3468	14.2118	13.2765	14.1063
9026	TAG53:4-FA18:2	Triacylglycerol	TAG Ester	54256	DMS-MS	100010404			2.9996	2.2665	1.0559	2.3171	2.4016	0.8433	0.6105	2.2094	3.2307	1.6963	1.0378	0.7867	0.7863	1.8688	1.4558	4.2183	1.643	1.7253	4.2319	2.0678	2.2503	0.9781	1.3346	4.0631	2.2992	1.8714	5.493	3.2887	1.7655	0.7519	1.7335	1.9645	1.0372	1.6479	1.2861	5.3085	1.6486	3.8132	3.0537	1.8185	2.5474
9027	TAG53:4-FA18:3	Triacylglycerol	TAG Ester	53729	DMS-MS	100009877			0.5075	0.4667	0.1376	0.2946	0.1813	0.0677	0.0516	0.2248	0.4854	0.2507	0.202	0.062	0.079	0.233	0.1388	0.9153	0.21	0.2954	0.5554	0.2009	0.1645	0.0617	0.1371	0.3957	0.3056	0.1621	0.9289	0.267	0.1897	0.0874	0.1508	0.2871	0.1471	0.1635	0.1474	0.5205	0.3257	0.6977	0.2409	0.2207	0.3428
9031	TAG53:4-FA20:4	Triacylglycerol	TAG Ester	53903	DMS-MS	100010051			0.2319	0.1552	0.1063	0.1219	0.1151	0.0301	0.0342	0.0822	0.2459	0.2161	0.2482	0.0141	0.033	0.0876	0.0436	0.6315	0.0231	0.184	0.1804	0.0298	0.0339	0.0496	0.0213	0.1447	0.1039	0.0294	0.3829	0.1003	0.1018	0.0227	0.039	0.1711	0.1068	0.0653	0.0566	0.152	0.1171	0.4355	0.0644	0.098	0.1832
9040	TAG53:5-FA18:1	Triacylglycerol	TAG Ester	54427	DMS-MS	100010575			6.8297	6.7564	6.6128	6.536	6.5846	6.3926	6.4683	6.557	6.1602	6.4446	6.486	6.1375	6.3965	6.4498	6.3712	6.768	6.3196	6.6763	7.0062	6.3947	6.7161	6.1254	6.2465	6.583	6.3037	6.4982	6.5219	6.5694	6.4444	6.1831	6.4532	6.354	6.3058	6.1164	7.0811	6.7837	6.466	6.7521	6.7204	6.3615	6.6677
9041	TAG53:5-FA18:2	Triacylglycerol	TAG Ester	54257	DMS-MS	100010405			8.7678	8.7072	8.4748	8.5846	8.8271	8.1629	8.0278	8.6131	8.4208	8.4423	8.236	7.7984	8.0588	8.4053	8.2435	9.1276	8.3067	8.565	9.2702	8.351	9.1495	7.7814	7.8883	9.1353	8.2998	8.324	9.1709	8.8727	8.2844	7.8841	8.4426	8.1903	7.9317	8.1744	9.2912	9.6857	8.3085	9.0127	8.7657	8.4845	8.3507
9042	TAG53:5-FA18:3	Triacylglycerol	TAG Ester	53730	DMS-MS	100009878			0.4809	0.3799	0.1811	0.3385	0.2256	0.1288	0.1134	0.2924	0.5156	0.266	0.2125	0.128	0.1384	0.3129	0.2007	0.7928	0.2976	0.2828	0.5528	0.2891	0.2451	0.122	0.1977	0.4059	0.3251	0.2063	0.8596	0.2847	0.2121	0.1509	0.2032	0.3101	0.1958	0.2168	0.254	0.5152	0.3073	0.6472	0.2861	0.2614	0.3338
9045	TAG53:5-FA20:4	Triacylglycerol	TAG Ester	53731	DMS-MS	100009879			0.4108	0.3317	0.2033	0.2826	0.209	0.067	0.0795	0.2055	0.3746	0.3834	0.3666	0.0353	0.0572	0.1532	0.0974	0.9881	0.0539	0.2392	0.3409	0.0849	0.0735	0.1086	0.0527	0.2981	0.178	0.0629	0.6169	0.1996	0.1751	0.0514	0.0741	0.3142	0.1599	0.1161	0.1292	0.2802	0.2554	0.7112	0.1577	0.2176	0.3091
9055	TAG53:6-FA18:1	Triacylglycerol	TAG Ester	53904	DMS-MS	100010052			2.0309	1.992	1.9438	1.8992	1.9326	1.8887	1.8235	1.8995	1.8088	1.9111	1.8932	1.7499	1.8772	1.8808	1.8251	1.9875	1.8084	2.0064	1.9727	1.8428	1.9276	1.7694	1.813	1.9235	1.8858	1.8819	1.8787	1.8931	1.8795	1.8307	1.8331	1.8508	1.7907	1.8105	2.1061	1.9207	1.8956	2.0828	1.8829	1.8536	1.965
9056	TAG53:6-FA18:2	Triacylglycerol	TAG Ester	54428	DMS-MS	100010576			1.1517	1.1518	1.1046	1.0934	1.1558	1.0426	1.0121	1.1052	1.1291	1.0949	1.0898	1.0041	1.0147	1.1267	1.1182	1.3127	1.0704	1.1166	1.2266	1.1097	1.1295	1.0116	1.0005	1.1587	1.1114	1.0616	1.221	1.1077	1.0771	1.0187	1.0703	1.1086	1.0408	1.0493	1.2181	1.2517	1.0854	1.2199	1.1418	1.0872	1.1221
9057	TAG53:6-FA18:3	Triacylglycerol	TAG Ester	53566	DMS-MS	100009714			2.1631	2.2177	2.1992	2.1252	2.1661	2.0576	2.0245	2.0642	2.1289	2.0996	2.0558	1.9359	2.0977	2.1024	2.0919	2.3023	2.1041	2.2343	2.2638	2.081	2.1927	2.0009	2.0102	2.1139	2.1277	2.0548	2.184	2.0813	2.1198	2.0635	2.1244	2.079	1.9858	2.0011	2.4014	2.2039	2.1014	2.3052	2.1711	2.0777	2.1266
9059	TAG53:6-FA20:4	Triacylglycerol	TAG Ester	53567	DMS-MS	100009715			0.162	0.1169	0.0786	0.1155	0.1233	0.0387	0.0363	0.1154	0.2225	0.1614	0.1344	0.0227	0.0363	0.0832	0.0481	0.4277	0.0356	0.0868	0.1725	0.0582	0.0515	0.0546	0.025	0.12	0.0939	0.0276	0.2576	0.0926	0.0718	0.0262	0.0403	0.1223	0.0796	0.073	0.07	0.1369	0.1037	0.2718	0.0886	0.0977	0.1332
9069	TAG53:7-FA18:3	Triacylglycerol	TAG Ester	54258	DMS-MS	100010406			0.2543	0.2361	0.2455	0.2291	0.2317	0.2372	0.2297	0.2382	0.2455	0.2299	0.2501	0.2091	0.2231	0.2404	0.2324	0.2679	0.2562	0.2627	0.2594	0.2328	0.2471	0.2068	0.2165	0.2403	0.2354	0.2293	0.2551	0.241	0.225	0.2205	0.2394	0.2349	0.2238	0.2222	0.2901	0.2456	0.2505	0.2739	0.2373	0.2355	0.2514
9078	TAG54:0-FA16:0	Triacylglycerol	TAG Ester	53732	DMS-MS	100009880			0.4956	0.1523	0.0979	0.1346	0.2344	0.0333	0.0637	0.0632	0.1193	0.2142	0.1728	0.0199	0.0523	0.1215	0.1532	0.3371	0.1061	0.4263	0.4183	0.1179	0.165	0.0242	0.0393	0.4423	0.163	0.0715	0.2079	0.2283	0.2361	0.0338	0.0523	0.1943	0.1973	0.0976	0.0393	0.2787	0.179	0.2982	0.1685	0.1651	0.2452
9080	TAG54:0-FA18:0	Triacylglycerol	TAG Ester	54068	DMS-MS	100010216			3.0182	0.5933	0.3076	0.3663	0.3841	0.0914	0.1425	0.1997	0.5497	0.4818	0.7603	0.0772	0.2713	0.2536	0.3211	0.5546	0.177	1.7748	1.1108	0.3361	0.2233	0.1345	0.1356	1.2359	0.4007	0.2173	0.8041	2.7845	0.612	0.1744	0.1633	0.6659	0.2985	0.2822	0.1889	1.1213	0.816	0.6703	1.6666	1.0021	1.2487
9089	TAG54:1-FA16:0	Triacylglycerol	TAG Ester	54429	DMS-MS	100010577			1.8667	0.8873	0.4909	0.5444	0.8348	0.1454	0.2585	0.3227	0.5011	0.9259	0.6273	0.1271	0.2269	0.3678	0.6188	1.292	0.2988	1.5864	1.3999	0.6663	0.2689	0.1181	0.1786	1.9982	0.5764	0.4602	1.0501	1.0926	0.5408	0.1774	0.3358	0.9129	0.6679	0.3503	0.1924	1.4416	0.776	1.0909	0.6565	0.5826	0.947
9092	TAG54:1-FA18:0	Triacylglycerol	TAG Ester	54069	DMS-MS	100010217			22.633	6.5607	2.0689	2.531	2.6232	0.5384	0.891	2.0049	3.6183	3.5741	4.3041	0.405	1.4117	1.5282	2.6676	4.7804	1.5927	12.3514	7.9292	2.9463	1.8505	0.9604	1.0756	8.298	2.4309	2.4013	5.9649	20.0007	2.9658	1.0358	1.3589	4.6723	1.7173	2.0278	1.2705	15.3874	6.149	5.5581	7.1604	5.0863	7.2236
9093	TAG54:1-FA18:1	Triacylglycerol	TAG Ester	53568	DMS-MS	100009716			14.1955	6.4324	2.1175	2.4294	2.6304	0.6905	1.0246	2.0713	2.788	3.1764	3.0886	0.5412	1.2419	1.4584	2.6338	4.5193	1.7153	8.3961	6.1708	2.7673	1.6867	0.9777	1.1906	6.7292	2.2988	2.6346	5.2371	10.6201	2.7065	1.1177	1.5039	4.1291	1.8369	1.9321	1.2534	14.2306	4.6386	4.8897	6.0037	3.7251	5.7055
9094	TAG54:1-FA20:0	Triacylglycerol	TAG Ester	54430	DMS-MS	100010578			1.8554	1.0159	0.4933	0.5928	0.7519	0.1619	0.2992	0.3845	0.5587	0.8679	0.6229	0.1333	0.2507	0.309	0.5657	1.0877	0.3092	1.3485	1.4864	0.7121	0.3076	0.1487	0.3285	1.5014	0.629	0.5912	0.9259	1.1098	0.6044	0.2081	0.362	0.8364	0.5524	0.3581	0.2174	1.7472	0.8256	1.0502	0.7217	0.6141	0.911
9095	TAG54:1-FA20:1	Triacylglycerol	TAG Ester	54431	DMS-MS	100010579			0.5133	0.2802	0.1683	0.2032	0.2413	0.0561	0.0599	0.1057	0.1083	0.3329	0.1445	0.0588	0.0701	0.1278	0.214	0.4363	0.11	0.4539	0.3741	0.1577	0.073	0.0576	0.0844	1.0557	0.1712	0.1972	0.4393	0.3228	0.1698	0.0773	0.1328	0.3542	0.1883	0.1317	0.0834	0.3061	0.2254	0.4006	0.2217	0.184	0.3557
9115	TAG54:2-FA16:0	Triacylglycerol	TAG Ester	53733	DMS-MS	100009881			4.3744	2.3221	1.4469	1.9475	2.1124	0.5401	0.5353	1.0323	0.9221	2.9836	0.8674	0.6117	0.5615	1.1176	1.9365	3.9475	0.9119	3.1726	2.9088	1.6307	0.7351	0.5355	0.6927	8.9287	1.3277	1.9613	3.8543	2.4988	1.1919	0.6714	1.3974	2.8745	1.5555	1.0594	0.7357	2.9805	2.0271	3.1024	2.0905	1.4118	2.5077
9118	TAG54:2-FA18:0	Triacylglycerol	TAG Ester	54259	DMS-MS	100010407			49.1217	30.242	8.2366	10.9635	10.2826	2.9373	3.5713	10.7674	10.6418	13.0756	8.6597	2.4862	4.316	6.0653	12.0788	18.8816	9.1012	30.4241	24.9936	12.963	8.3883	4.7499	6.146	23.944	8.8555	14.2332	22.709	32.7024	9.8492	5.1438	7.2974	15.7268	6.7262	8.1441	6.1234	80.7132	18.4598	20.5611	27.9664	13.2096	19.3276
9119	TAG54:2-FA18:1	Triacylglycerol	TAG Ester	54070	DMS-MS	100010218			87.6596	65.8761	17.225	22.5748	20.5544	6.2439	7.5618	21.4069	17.4722	25.569	15.1527	5.7344	8.0943	11.1872	26.8396	35.6787	19.4844	51.2956	45.6616	27.355	15.19	9.1377	12.8039	48.1236	17.0688	31.3797	42.2342	55.931	19.9985	10.9736	15.7767	30.2005	13.2238	14.9547	12.5684	159.467	36.6677	40.1471	54.3393	25.7434	38.7821
9120	TAG54:2-FA18:2	Triacylglycerol	TAG Ester	54432	DMS-MS	100010580			4.9796	1.7913	0.9012	1.506	1.8916	0.4107	0.3906	1.3319	1.8792	1.7502	1.1506	0.3689	0.6874	1.0935	1.4005	2.7128	1.256	4.2335	3.381	1.5708	1.4917	0.6627	0.8063	3.6504	1.4441	1.3702	3.4489	4.071	1.2489	0.585	0.9159	2.2023	1.0915	1.3958	0.8617	7.5073	1.5633	2.6778	3.7544	1.4549	2.1401
9122	TAG54:2-FA20:0	Triacylglycerol	TAG Ester	53905	DMS-MS	100010053			0.8206	0.3408	0.2304	0.3334	0.5411	0.1068	0.1318	0.2374	0.3846	0.4642	0.2655	0.0958	0.143	0.2273	0.2925	0.6457	0.2329	0.7376	0.7105	0.4103	0.2429	0.0962	0.216	0.8569	0.3671	0.2699	0.5712	0.4605	0.2468	0.109	0.2092	0.4691	0.3302	0.2598	0.1631	1.0147	0.3438	0.5677	0.5095	0.2654	0.3874
9123	TAG54:2-FA20:1	Triacylglycerol	TAG Ester	53393	DMS-MS	100009541			3.6415	2.1957	1.3513	1.79	1.6062	0.4836	0.4738	0.9184	0.6815	2.7807	0.7153	0.5966	0.4544	0.9221	1.749	3.3473	0.8853	2.603	2.5704	1.4626	0.6019	0.5	0.7395	8.2272	1.1347	1.8467	3.3132	2.1578	1.1566	0.6392	1.2751	2.473	1.3735	0.9025	0.6845	2.5721	1.855	2.8533	1.8642	1.2844	2.1897
9124	TAG54:2-FA20:2	Triacylglycerol	TAG Ester	53394	DMS-MS	100009542			0.4996	0.2217	0.1445	0.2335	0.178	0.0643	0.0538	0.1507	0.1205	0.3324	0.1081	0.0759	0.0699	0.1566	0.1746	0.4407	0.0635	0.4616	0.2976	0.1408	0.1059	0.0593	0.0648	1.2201	0.1613	0.1969	0.4954	0.2306	0.1456	0.0617	0.1486	0.4243	0.1875	0.1453	0.1204	0.2244	0.191	0.3488	0.2506	0.1738	0.2683
9131	TAG54:3-FA16:0	Triacylglycerol	TAG Ester	53569	DMS-MS	100009717			6.221	2.609	1.6753	3.0083	2.715	0.8873	0.6154	1.9816	1.3683	3.9254	1.0125	1.0845	0.72	1.9558	2.3066	5.5301	1.1554	3.9022	4.044	2.1913	1.5206	0.8886	1.005	15.2532	2.1707	2.9704	6.2801	3.231	1.6782	0.7954	2.1522	4.5453	2.0845	1.8768	1.422	3.3555	2.1339	4.3386	3.5185	2.0853	3.1838
9132	TAG54:3-FA16:1	Triacylglycerol	TAG Ester	54260	DMS-MS	100010408			0.451	0.318	0.1878	0.2693	0.1777	0.081	0.0682	0.1747	0.0984	0.3256	0.0764	0.1249	0.0674	0.1738	0.2607	0.3427	0.1708	0.4472	0.3247	0.2329	0.1261	0.0597	0.1174	1.1698	0.1699	0.2025	0.4434	0.233	0.1757	0.0898	0.2231	0.3825	0.1332	0.1239	0.1894	0.3915	0.3619	0.3205	0.3035	0.188	0.3328
9134	TAG54:3-FA18:0	Triacylglycerol	TAG Ester	54604	DMS-MS	100010752			32.0317	16.2572	6.4436	12.7254	12.5756	3.6076	2.8195	13.4704	12.2401	12.6097	5.8285	3.5574	4.3574	8.7272	11.271	19.7758	11.9448	23.2053	24.4421	14.2849	12.8466	6.0552	7.7876	23.8545	10.5923	14.1158	24.9546	25.5646	10.3805	5.1544	8.669	14.36	6.8226	10.45	7.144	76.9841	11.5543	19.9569	31.8302	10.4138	13.9142
9135	TAG54:3-FA18:1	Triacylglycerol	TAG Ester	53906	DMS-MS	100010054			173.03	192.023	56.8051	80.898	65.1088	26.216	25.349	82.829	44.7509	72.8289	26.9682	28.622	23.9531	36.4126	101.036	94.4806	85.2161	102.362	126.876	107.5	54.8046	31.1406	51.1217	126.727	57.7162	119.817	116.734	120.565	62.8394	44.7352	62.6489	74.1525	43.4249	43.0322	53.7558	359.368	100.886	111.1	177.243	74.3815	99.5035
9136	TAG54:3-FA18:2	Triacylglycerol	TAG Ester	54433	DMS-MS	100010581			30.0406	17.4189	6.6744	12.8691	13.9494	3.7088	2.8474	14.2235	12.1381	12.9216	5.4904	3.695	4.3331	8.637	12.3147	19.7652	12.7851	21.9538	25.1242	15.2811	13.1288	5.9185	7.7587	26.7049	10.8462	14.6147	25.5999	25.5345	10.1791	5.299	8.9541	14.98	7.1484	10.8029	7.4227	84.3617	11.4492	20.5485	32.7317	10.9126	14.3961
9137	TAG54:3-FA18:3	Triacylglycerol	TAG Ester	54605	DMS-MS	100010753			0.6145	0.3989	0.2919	0.2903	0.3397	0.192	0.2174	0.3286	0.3877	0.3672	0.3076	0.2192	0.2613	0.3828	0.3409	0.6051	0.4279	0.7387	0.5534	0.3562	0.3184	0.2246	0.2678	0.4481	0.3471	0.2927	0.7443	0.4163	0.3681	0.3437	0.246	0.5646	0.4486	0.3994	0.532	0.796	0.3639	0.5351	0.4595	0.351	0.4631
9139	TAG54:3-FA20:1	Triacylglycerol	TAG Ester	54434	DMS-MS	100010582			2.115	0.9021	0.6789	1.0286	1.2666	0.3109	0.2366	0.677	0.5654	1.4667	0.333	0.44	0.2841	0.7149	1.0258	2.1171	0.6681	1.4066	1.6177	0.9968	0.5388	0.3506	0.5267	6.111	0.8501	1.0709	2.1415	1.3334	0.6967	0.3347	0.8153	1.4737	0.7941	0.6948	0.5345	1.6271	0.8766	1.7101	1.4464	0.7836	1.2284
9140	TAG54:3-FA20:2	Triacylglycerol	TAG Ester	54261	DMS-MS	100010409			3.7858	1.9263	1.1297	2.003	1.2924	0.5791	0.423	1.2934	0.8036	2.6561	0.6002	0.7051	0.5161	1.23	1.4012	3.0926	0.5784	2.6785	2.3351	1.3536	0.9334	0.5149	0.5944	9.4106	1.2749	1.8266	3.7176	1.7785	1.0386	0.5541	1.3098	2.762	1.3825	1.0794	1.0035	1.924	1.6656	2.4716	2.2767	1.3719	2.0146
9141	TAG54:3-FA20:3	Triacylglycerol	TAG Ester	53395	DMS-MS	100009543			0.9695	0.5344	0.2877	0.4505	0.3686	0.1283	0.0911	0.3679	0.3006	0.7006	0.2965	0.1216	0.1199	0.2898	0.2428	1.1482	0.1199	0.8652	0.6174	0.2287	0.1986	0.1461	0.0966	1.1184	0.2863	0.2461	1.078	0.4385	0.259	0.1314	0.1741	0.9732	0.4032	0.3155	0.2936	0.4623	0.5664	0.8682	0.4076	0.3506	0.5271
9147	TAG54:4-FA16:0	Triacylglycerol	TAG Ester	53734	DMS-MS	100009882			7.9094	3.4069	1.9404	3.5568	3.3771	1.0034	0.6649	2.9275	1.8274	4.6469	1.7096	1.1885	0.7932	2.4315	2.0931	8.8176	1.2121	4.6222	5.0902	2.2063	2.0968	1.2644	1.0699	13.3591	2.4997	2.7022	8.7334	3.4926	1.905	0.9454	1.9357	6.9843	2.5975	2.7138	2.2111	3.669	2.9144	6.4489	3.9422	2.724	3.7784
9148	TAG54:4-FA16:1	Triacylglycerol	TAG Ester	53570	DMS-MS	100009718			0.6843	0.411	0.2094	0.4337	0.2963	0.1272	0.0733	0.3641	0.1562	0.4414	0.0939	0.2026	0.0958	0.306	0.3199	0.486	0.2367	0.5788	0.5324	0.385	0.2551	0.102	0.1856	1.8667	0.2505	0.3151	0.7395	0.3371	0.2474	0.1208	0.3257	0.6187	0.2083	0.2071	0.3612	0.9492	0.4232	0.4988	0.6147	0.2844	0.4403
9150	TAG54:4-FA18:0	Triacylglycerol	TAG Ester	53907	DMS-MS	100010055			10.0105	4.0898	1.9588	4.9244	5.9284	1.477	0.8425	5.5798	6.4157	4.7806	2.0239	1.607	1.6515	4.5357	3.9227	8.3383	6.0252	7.5109	10.6481	5.8793	7.2629	2.5931	3.325	8.8073	4.9044	4.3908	11.9978	8.5544	3.878	1.9356	3.3743	6.0251	2.6152	5.117	3.2755	24.2399	3.405	8.2817	11.4062	3.3887	4.2272
9151	TAG54:4-FA18:1	Triacylglycerol	TAG Ester	54435	DMS-MS	100010583			107.304	104.409	30.1749	59.603	60.5489	20.5882	14.086	79.3452	45.0649	53.827	15.4854	24.5681	18.21	32.4341	73.7513	70.9492	77.5156	66.6648	104.648	97.8119	65.5273	27.449	42.0916	107.097	49.5292	86.5403	92.3249	93.7709	47.1856	28.976	48.7788	51.9994	34.3125	39.4842	49.646	342.073	53.7402	88.5329	158.779	54.0713	63.016
9152	TAG54:4-FA18:2	Triacylglycerol	TAG Ester	54262	DMS-MS	100010410			62.913	56.3436	16.2237	35.589	38.6291	11.8039	7.5629	46.7383	30.6849	31.0774	9.3588	13.7483	10.4836	21.0219	41.3349	44.6236	46.5816	39.5599	64.1725	56.3525	42.4605	16.505	24.2199	65.5114	31.3244	49.2682	60.8715	58.8191	27.3855	15.963	28.3038	32.2892	19.7798	25.799	26.9721	263.531	29.2071	53.9459	97.8491	30.4227	36.3509
9153	TAG54:4-FA18:3	Triacylglycerol	TAG Ester	54436	DMS-MS	100010584			3.4633	2.4057	0.6801	1.3408	0.974	0.3913	0.2788	1.4716	1.7246	1.5429	0.7981	0.4249	0.4781	1.178	1.2832	3.465	2.4413	2.6816	2.9547	2.1452	1.2439	0.4496	0.9411	2.3609	1.5754	1.2541	3.6494	1.8604	0.9603	0.7478	0.8409	1.84	0.8896	1.1411	1.3436	5.7328	1.6381	2.5929	2.3982	1.1426	1.5499
9155	TAG54:4-FA20:1	Triacylglycerol	TAG Ester	54263	DMS-MS	100010411			0.3665	0.1898	0.0996	0.1889	0.1734	0.0623	0.0364	0.1573	0.1046	0.2214	0.0477	0.1003	0.0502	0.1514	0.1878	0.3422	0.1736	0.2553	0.3025	0.2326	0.1302	0.0573	0.12	1.0012	0.1712	0.1626	0.4009	0.2026	0.1269	0.0646	0.1589	0.257	0.1056	0.1266	0.1529	0.5273	0.1657	0.2921	0.2946	0.1375	0.2046
9156	TAG54:4-FA20:2	Triacylglycerol	TAG Ester	53908	DMS-MS	100010056			2.3377	0.8851	0.598	1.2177	1.1492	0.3515	0.2255	0.9868	0.6484	1.4585	0.3238	0.4962	0.2985	0.9271	0.8872	2.0519	0.4743	1.5248	1.725	1.0266	0.8676	0.3652	0.4373	6.4775	0.9901	1.0261	2.4193	1.1836	0.6498	0.3225	0.8398	1.6863	0.781	0.861	0.7694	1.766	0.8236	1.4925	1.7493	0.8659	1.1333
9157	TAG54:4-FA20:3	Triacylglycerol	TAG Ester	53909	DMS-MS	100010057			7.0981	4.2641	2.2022	3.8037	2.5437	0.9952	0.721	3.2657	1.9613	5.4464	1.6612	1.0666	0.8719	2.196	1.9665	8.2605	0.9952	4.606	4.5205	2.3344	1.6458	1.1962	0.8445	8.6064	1.9291	2.2866	8.3161	3.1176	1.7478	1.1852	1.5603	6.4746	2.7495	2.1877	2.5628	3.7043	4.5636	6.3829	3.499	2.7654	3.6009
9158	TAG54:4-FA20:4	Triacylglycerol	TAG Ester	54437	DMS-MS	100010585			3.1842	1.5101	0.9059	1.4282	1.1656	0.377	0.3696	0.9646	1.2025	2.2845	1.4264	0.213	0.3707	0.8388	0.5962	4.9955	0.3854	2.4703	2.3065	0.6631	0.542	0.8511	0.3923	1.8428	0.8128	0.5374	2.7662	1.7292	0.8621	0.4059	0.438	2.1592	1.4122	0.8198	1.2226	1.5059	1.274	3.1153	1.1311	1.0425	1.5174
9159	TAG54:4-FA22:1	Triacylglycerol	TAG Ester	54438	DMS-MS	100010586			0.3032	0.305	0.088	0.1745	0.1836	0.0639	0.0411	0.2284	0.1396	0.1592	0.0453	0.0693	0.0593	0.0982	0.2218	0.2291	0.2459	0.2101	0.3189	0.3004	0.1953	0.0743	0.1208	0.3333	0.1493	0.2613	0.2982	0.2755	0.135	0.0825	0.1387	0.1667	0.098	0.1219	0.1456	2.1151	0.1533	0.2959	0.5236	0.1519	0.1895
9160	TAG54:4-FA22:4	Triacylglycerol	TAG Ester	53571	DMS-MS	100009719			0.7397	0.2286	0.182	0.1958	0.2304	0.0716	0.0744	0.1139	0.1438	0.6169	0.2549	0.0646	0.0546	0.172	0.1292	0.9981	0.0494	0.5589	0.272	0.0651	0.0759	0.1292	0.0545	0.7117	0.1715	0.1165	0.5805	0.2188	0.1306	0.0742	0.083	0.6004	0.2529	0.1519	0.1782	0.2047	0.1937	0.6829	0.1598	0.191	0.3329
9165	TAG54:5-FA16:0	Triacylglycerol	TAG Ester	54439	DMS-MS	100010587			8.9039	3.933	2.1782	3.8193	3.7319	1.1003	0.8509	3.2836	2.5423	5.4901	2.607	1.0066	0.8089	2.643	1.9586	14.0722	1.3642	4.5667	5.9485	2.2658	2.2169	2.018	1.1707	8.3632	2.4427	2.1325	8.9413	3.7445	2.2514	1.1411	1.5046	6.9927	3.1018	2.9616	3.0458	4.2205	3.0436	8.9047	3.6365	2.8485	3.7288
9166	TAG54:5-FA16:1	Triacylglycerol	TAG Ester	53735	DMS-MS	100009883			1.0167	0.5289	0.2753	0.5597	0.3925	0.165	0.0931	0.5344	0.2459	0.6636	0.1875	0.2269	0.1245	0.4352	0.3173	0.9323	0.2367	0.7877	0.7087	0.4435	0.3455	0.1565	0.1895	1.7163	0.3149	0.2754	1.1665	0.3576	0.269	0.157	0.3284	1.1297	0.3035	0.3172	0.5974	0.8039	0.6315	0.84	0.6548	0.3841	0.5844
9168	TAG54:5-FA18:0	Triacylglycerol	TAG Ester	54440	DMS-MS	100010588			1.6194	0.6563	0.2697	0.6792	0.5407	0.1951	0.132	0.6643	1.3576	0.7813	0.3287	0.2361	0.249	0.7409	0.5473	1.8125	1.405	1.2479	1.5418	0.9078	0.7652	0.2437	0.4535	0.9926	0.7834	0.4702	2.4382	0.7518	0.5005	0.3219	0.367	0.9764	0.3782	0.6835	0.6753	2.2645	0.6472	1.3138	1.1351	0.4697	0.6188
9169	TAG54:5-FA18:1	Triacylglycerol	TAG Ester	53736	DMS-MS	100009884			36.3919	29.7802	8.4784	20.5542	23.0392	7.1672	3.9692	30.6399	25.4324	21.4977	5.9018	8.8552	6.1021	15.2119	23.8416	35.0895	38.7178	22.1315	43.6306	42.1035	33.0715	9.8752	16.0045	40.0189	22.4068	26.8936	43.9318	32.2948	15.4297	9.8793	16.036	20.3344	11.881	17.3742	21.7966	184.622	16.8615	36.9896	56.7788	17.5683	20.1815
9170	TAG54:5-FA18:2	Triacylglycerol	TAG Ester	53910	DMS-MS	100010058			37.3018	24.0234	8.7495	22.5551	33.6096	8.1881	4.0749	39.1504	34.1795	23.3595	5.2949	10.605	7.1934	17.0739	28.4326	33.2268	38.4977	23.2174	48.243	46.3372	44.2751	12.1413	17.0335	47.5926	25.2252	31.8425	49.2714	41.3094	17.1077	9.3482	18.905	22.3081	13.4927	22.6224	21.8673	233.227	15.0825	43.0187	77.9124	19.2696	20.4998
9171	TAG54:5-FA18:3	Triacylglycerol	TAG Ester	54441	DMS-MS	100010589			10.42	10.5271	2.3007	5.473	2.919	1.6764	1.0537	6.443	5.5791	5.0586	1.8036	2.1005	1.5547	4.2789	5.2746	10.5005	11.9408	5.8361	10.9528	10.5673	5.2302	1.533	4.0001	8.1992	5.8053	5.9778	12.3194	5.8746	3.6528	3.2704	3.8411	5.3357	2.8353	3.6754	6.2662	27.9999	5.6534	8.4493	8.911	4.497	5.4555
9174	TAG54:5-FA20:2	Triacylglycerol	TAG Ester	53396	DMS-MS	100009544			0.388	0.1708	0.0978	0.2206	0.1834	0.0631	0.0374	0.2263	0.143	0.2425	0.0641	0.109	0.0581	0.2008	0.171	0.3791	0.1328	0.2688	0.3418	0.2332	0.1822	0.0621	0.0973	0.997	0.1812	0.153	0.4677	0.1778	0.1149	0.0709	0.1538	0.3239	0.1325	0.1586	0.2162	0.5012	0.1511	0.3085	0.3356	0.1616	0.2061
9175	TAG54:5-FA20:3	Triacylglycerol	TAG Ester	53737	DMS-MS	100009885			4.2487	1.9798	1.2919	2.3194	2.3015	0.7093	0.4088	2.6282	1.7107	3.0521	0.9694	0.8213	0.5576	1.7511	1.283	5.5347	0.7511	2.6608	3.501	1.9356	1.5934	0.9135	0.6209	5.9147	1.5694	1.3313	5.3633	2.0264	1.1074	0.6918	0.9848	4.0717	1.6674	1.8372	2.1099	2.8824	2.524	4.0705	2.7309	1.8263	2.066
9176	TAG54:5-FA20:4	Triacylglycerol	TAG Ester	54264	DMS-MS	100010412			19.2726	11.4498	6.0776	9.3656	7.1633	2.7342	2.62	7.5001	6.7862	13.6329	8.0293	1.5977	2.0924	5.0278	4.1337	33.9887	2.5447	10.8291	13.8311	5.3316	3.5448	5.8986	2.5781	11.3209	4.5547	4.0809	16.3879	9.5982	5.2846	2.9385	2.7184	11.9836	8.7871	4.9527	8.3832	10.7831	8.7304	20.6561	7.7889	7.1294	8.5402
9177	TAG54:5-FA20:5	Triacylglycerol	TAG Ester	54265	DMS-MS	100010413			0.8226	0.2113	0.1263	0.1764	0.2969	0.0693	0.0576	0.2454	0.2206	0.3678	0.2157	0.0331	0.0801	0.2685	0.1699	1.6815	0.3311	0.4297	0.7006	0.1437	0.5013	0.0689	0.04	0.1634	0.1082	0.0799	0.5173	0.1279	0.3641	0.0825	0.0523	0.4103	0.1736	0.1817	0.2155	0.2952	0.3384	1.2565	0.1771	0.1446	0.2055
9178	TAG54:5-FA22:1	Triacylglycerol	TAG Ester	54442	DMS-MS	100010590			0.2572	0.2089	0.0672	0.1474	0.1868	0.0564	0.035	0.232	0.2038	0.1468	0.0425	0.0687	0.0583	0.1174	0.1808	0.2482	0.2857	0.176	0.3166	0.308	0.2555	0.0734	0.1182	0.2956	0.1541	0.1962	0.3428	0.2387	0.1167	0.079	0.1344	0.1532	0.089	0.1437	0.1606	1.6917	0.1235	0.2804	0.4436	0.125	0.1464
9179	TAG54:5-FA22:4	Triacylglycerol	TAG Ester	54071	DMS-MS	100010219			0.6855	0.2741	0.1572	0.2845	0.1915	0.0719	0.0731	0.1395	0.1061	0.4804	0.1485	0.0651	0.0445	0.182	0.126	0.7378	0.0544	0.5123	0.2838	0.0883	0.081	0.0891	0.0685	0.6834	0.1623	0.0738	0.6188	0.1645	0.1352	0.0509	0.0978	0.7491	0.162	0.1058	0.2159	0.23	0.2516	0.5311	0.3703	0.216	0.3242
9180	TAG54:5-FA22:5	Triacylglycerol	TAG Ester	54606	DMS-MS	100010754			1.9631	0.5971	0.4001	0.6253	0.6322	0.2021	0.1671	0.3306	0.3133	2.232	0.4306	0.1817	0.1316	0.6079	0.365	3.0452	0.2509	1.146	1.0506	0.1828	0.3235	0.3574	0.187	1.3575	0.3801	0.4263	1.6204	0.4798	0.503	0.2063	0.2723	1.5858	0.4659	0.473	0.438	0.5535	0.5404	1.9763	0.4807	0.4231	0.719
9185	TAG54:6-FA16:0	Triacylglycerol	TAG Ester	53572	DMS-MS	100009720			6.4032	1.6649	1.1627	2.0075	2.5505	0.6939	0.4649	1.9174	1.7834	3.4153	1.465	0.4171	0.4613	1.8317	1.1666	11.8401	1.387	2.5782	4.3952	1.2925	1.9945	1.2451	0.6736	3.1938	1.3866	0.905	4.7387	1.8301	1.6829	0.678	0.7036	3.9699	1.7916	1.9278	1.853	2.3629	1.6958	6.6329	1.8804	1.4323	1.7518
9186	TAG54:6-FA16:1	Triacylglycerol	TAG Ester	53738	DMS-MS	100009886			1.2495	0.5675	0.3223	0.6088	0.52	0.196	0.1298	0.6195	0.3554	0.8407	0.3092	0.2032	0.1368	0.4959	0.2892	1.5418	0.2467	0.7726	0.8729	0.431	0.4177	0.2145	0.1837	1.1288	0.3122	0.1991	1.2236	0.3341	0.3477	0.1895	0.2666	1.2143	0.3881	0.3953	0.8107	0.5896	0.6612	1.2189	0.5687	0.4235	0.644
9189	TAG54:6-FA18:1	Triacylglycerol	TAG Ester	54072	DMS-MS	100010220			7.7366	4.9258	1.4819	3.6956	2.8204	1.3184	0.7061	5.2313	6.5259	4.2688	1.2539	1.6752	1.1098	4.0929	3.8314	9.8037	11.8653	3.9251	9.125	8.4065	5.7644	1.1721	3.1061	6.4656	4.688	3.7613	11.1082	4.2532	3.0415	1.9558	2.7466	4.1332	1.9627	3.4758	5.3175	19.5251	3.8377	7.6395	6.3953	3.092	3.5474
9190	TAG54:6-FA18:2	Triacylglycerol	TAG Ester	54073	DMS-MS	100010221			14.2074	7.131	3.0126	7.5377	13.7773	3.0463	1.2644	14.7662	23.1063	9.8691	2.4539	3.8675	2.4499	8.1569	9.7252	18.0183	19.7868	8.0278	20.7062	18.9309	22.1384	4.5385	6.5858	17.1116	11.2169	8.8943	30.643	14.1577	5.6554	3.3075	6.292	9.6413	5.0554	11.4283	9.8241	83.6622	5.9936	20.0357	24.5674	6.4944	6.9866
9191	TAG54:6-FA18:3	Triacylglycerol	TAG Ester	53739	DMS-MS	100009887			7.3327	4.962	1.3297	3.8658	2.6889	1.373	0.6698	6.1592	7.1447	3.8656	1.1769	1.7607	1.1559	4.0544	3.7324	8.5892	12.0612	3.5356	9.2403	9.1571	5.7064	1.2183	3.3761	6.8066	4.9863	4.1332	11.3279	4.4464	2.6269	2.0573	2.9705	3.7918	2.1515	3.6035	5.4881	19.6045	3.6216	6.5676	6.9146	3.2127	3.5476
9195	TAG54:6-FA20:3	Triacylglycerol	TAG Ester	54074	DMS-MS	100010222			0.6454	0.3533	0.1963	0.387	0.3249	0.1252	0.0694	0.5338	0.3389	0.493	0.1662	0.1634	0.1002	0.3647	0.2279	0.9043	0.1791	0.4543	0.564	0.4178	0.2763	0.1239	0.1084	0.8559	0.2711	0.1673	0.893	0.2389	0.1774	0.1319	0.1697	0.6751	0.2597	0.2792	0.53	0.507	0.4427	0.696	0.4274	0.3059	0.3492
9196	TAG54:6-FA20:4	Triacylglycerol	TAG Ester	53911	DMS-MS	100010059			12.2866	5.2958	3.8945	5.8681	6.9485	1.9217	1.4953	6.0934	5.9934	7.7409	4.9074	1.2681	1.3564	4.0839	2.7722	24.1028	1.9462	6.4159	10.4476	4.105	3.3992	4.3503	1.8106	8.2662	3.7498	2.3522	11.0149	6.2514	3.1268	1.763	1.8201	8.1092	5.624	4.251	6.7135	7.5496	4.5385	13.4563	5.7485	4.706	5.1603
9197	TAG54:6-FA20:5	Triacylglycerol	TAG Ester	54607	DMS-MS	100010755			5.9579	1.7523	0.8959	1.2882	2.0394	0.5854	0.4144	2.0427	1.428	2.352	1.2815	0.2564	0.517	1.8462	1.2608	12.1459	2.6079	2.3288	4.5978	1.2538	3.9915	0.5471	0.3488	1.0128	0.6716	0.7006	3.6752	0.8392	2.4526	0.6736	0.377	2.6261	1.1331	1.2395	1.7811	2.2158	2.4252	8.8175	1.2754	1.0752	1.3161
9200	TAG54:6-FA22:5	Triacylglycerol	TAG Ester	53397	DMS-MS	100009545			1.8535	0.7274	0.3524	0.7948	0.5476	0.2262	0.1615	0.4324	0.2635	1.8306	0.2653	0.2114	0.1214	0.7468	0.3906	2.2913	0.38	0.958	1.0007	0.2278	0.4495	0.2474	0.2408	1.2403	0.3507	0.3243	1.4928	0.3841	0.5517	0.1896	0.3182	1.908	0.3466	0.3631	0.5681	0.6521	0.7067	1.658	0.988	0.4604	0.7198
9201	TAG54:6-FA22:6	Triacylglycerol	TAG Ester	54608	DMS-MS	100010756			5.3404	0.906	0.6282	1.0676	1.2683	0.4825	0.257	0.4581	0.484	3.6143	0.6204	0.17	0.242	1.1543	0.7724	9.2745	1.0666	1.551	2.3622	0.2218	0.8795	0.4635	0.3086	2.0408	0.7815	0.5876	2.0494	0.5181	1.2893	0.4573	0.5246	3.0498	1.1433	1.4931	0.5712	0.7161	0.8157	4.3123	0.8336	0.4773	0.8153
9206	TAG54:7-FA16:1	Triacylglycerol	TAG Ester	54266	DMS-MS	100010414			1.0303	0.2692	0.1862	0.348	0.3893	0.1448	0.0784	0.3932	0.2477	0.6554	0.1926	0.101	0.0983	0.4003	0.1999	1.4041	0.2801	0.4153	0.6366	0.2411	0.3826	0.1362	0.1131	0.5495	0.1942	0.1089	0.6539	0.1716	0.3031	0.1338	0.1515	0.8355	0.2631	0.322	0.5097	0.3297	0.3576	0.9618	0.2935	0.2157	0.3232
9208	TAG54:7-FA18:1	Triacylglycerol	TAG Ester	53573	DMS-MS	100009721			1.1388	0.7192	0.1958	0.485	0.332	0.1544	0.0957	0.5463	0.8109	0.6	0.2202	0.1485	0.1322	0.6234	0.4378	1.5581	1.7104	0.7394	1.012	0.7507	0.5612	0.0911	0.2578	0.6206	0.5794	0.266	1.3007	0.3095	0.4776	0.2374	0.2405	0.5262	0.267	0.3727	0.6382	1.0295	0.6962	1.1409	0.7153	0.3521	0.439
9209	TAG54:7-FA18:2	Triacylglycerol	TAG Ester	54075	DMS-MS	100010223			3.2862	1.3101	0.5435	1.4722	1.9025	0.6166	0.2406	2.9265	6.7097	2.0326	0.5476	0.835	0.4837	2.3626	1.6139	5.1026	6.69	1.419	4.8371	4.2146	4.1036	0.5682	1.396	3.0545	2.4584	1.4452	9.0363	1.9108	1.2402	0.7067	1.1349	1.8866	0.8683	2.658	2.5592	7.8704	1.8923	3.8376	3.1895	1.2836	1.3447
9210	TAG54:7-FA18:3	Triacylglycerol	TAG Ester	53398	DMS-MS	100009546			2.6109	1.3822	0.436	1.3211	1.1738	0.4837	0.2057	2.3036	4.8767	1.5666	0.5187	0.6756	0.4297	1.7707	1.2382	3.8474	6.0163	1.1735	3.6841	3.5861	2.5464	0.4247	1.1905	2.2653	2.1819	1.1563	6.7795	1.3938	0.8307	0.7222	0.9218	1.4929	0.8272	1.8281	2.2775	5.5954	1.9428	2.7755	2.2575	1.1043	1.1344
9214	TAG54:7-FA20:4	Triacylglycerol	TAG Ester	53574	DMS-MS	100009722			1.7559	0.8762	0.5636	0.8829	0.9682	0.3452	0.2286	1.169	1.0681	1.2272	0.7748	0.2617	0.2402	0.7978	0.4418	3.4179	0.4413	1.0672	1.5604	0.8095	0.573	0.5121	0.2825	1.2168	0.6035	0.2647	1.7235	0.6325	0.4592	0.3166	0.2862	1.271	0.8215	0.6879	1.5436	1.0367	0.8147	2.1418	0.7656	0.757	0.895
9215	TAG54:7-FA20:5	Triacylglycerol	TAG Ester	53399	DMS-MS	100009547			3.9218	0.8472	0.5978	0.8195	1.9578	0.4362	0.2358	1.752	1.2622	1.3669	0.7908	0.2311	0.3607	1.6356	0.7994	8.5945	2.1381	1.4564	3.7668	1.05	4.1298	0.4212	0.2634	0.7779	0.5738	0.427	2.6471	0.6293	1.6002	0.4195	0.2645	1.8733	0.7445	1.0917	1.4918	1.559	1.3965	5.8577	1.0224	0.7652	0.8083
9217	TAG54:7-FA22:5	Triacylglycerol	TAG Ester	54443	DMS-MS	100010591			0.3793	0.1907	0.094	0.258	0.1924	0.0628	0.0459	0.1646	0.1093	0.3845	0.071	0.0654	0.0388	0.2598	0.122	0.6171	0.1886	0.2205	0.3392	0.0798	0.2253	0.0525	0.068	0.3533	0.1307	0.0871	0.3613	0.0974	0.1798	0.045	0.102	0.3544	0.0966	0.1102	0.1655	0.2449	0.1579	0.4402	0.4818	0.145	0.147
9218	TAG54:7-FA22:6	Triacylglycerol	TAG Ester	54609	DMS-MS	100010757			5.0549	1.1205	0.4696	1.5366	1.043	0.5604	0.266	0.6454	0.3978	2.9816	0.3654	0.185	0.2202	1.3163	0.8623	6.6489	1.5726	1.2191	1.9907	0.213	1.2258	0.2825	0.3953	2.1193	0.6472	0.4493	2.0009	0.3152	1.3918	0.4503	0.6601	3.41	0.8141	1.1571	0.6079	0.9593	1.006	3.4127	1.8771	0.501	0.7443
9225	TAG54:8-FA18:2	Triacylglycerol	TAG Ester	53400	DMS-MS	100009548			0.4871	0.2062	0.0804	0.2139	0.2362	0.0778	0.0427	0.2905	0.8051	0.2781	0.1052	0.0776	0.0634	0.3772	0.1965	0.8229	1.0451	0.2839	0.5461	0.3676	0.4233	0.0514	0.1176	0.3123	0.2973	0.1215	1.0878	0.1511	0.1998	0.0935	0.1128	0.2446	0.1264	0.2578	0.3183	0.4562	0.3949	0.5666	0.3615	0.1492	0.1705
9226	TAG54:8-FA18:3	Triacylglycerol	TAG Ester	53740	DMS-MS	100009888			0.5882	0.3017	0.1072	0.2727	0.1955	0.0973	0.0619	0.4322	1.4576	0.3234	0.1666	0.1421	0.1258	0.4244	0.2496	1.0481	1.8255	0.2685	0.7185	0.6766	0.3873	0.0642	0.194	0.3377	0.4278	0.1876	1.9651	0.178	0.1604	0.1832	0.1489	0.3091	0.203	0.373	0.5864	0.6747	0.7295	0.6609	0.3233	0.2225	0.2174
9229	TAG54:8-FA20:4	Triacylglycerol	TAG Ester	53741	DMS-MS	100009889			0.2216	0.1577	0.1014	0.1335	0.1536	0.0569	0.059	0.1826	0.2224	0.2406	0.2147	0.0376	0.0411	0.1418	0.0641	0.513	0.0626	0.1516	0.1762	0.0978	0.0743	0.0438	0.0281	0.1186	0.084	0.0253	0.1952	0.0453	0.0628	0.0483	0.0328	0.1744	0.195	0.0944	0.2978	0.1596	0.1421	0.3867	0.0933	0.101	0.131
9230	TAG54:8-FA20:5	Triacylglycerol	TAG Ester	54444	DMS-MS	100010592			0.5838	0.1537	0.0894	0.1395	0.3004	0.0869	0.043	0.3459	0.2546	0.2294	0.1353	0.0508	0.0678	0.3355	0.1581	1.2382	0.4817	0.2778	0.6063	0.2474	0.7074	0.0567	0.0451	0.1364	0.1034	0.0539	0.4183	0.1606	0.2683	0.0844	0.0508	0.3008	0.1208	0.1877	0.3807	0.3612	0.2768	0.9434	0.1705	0.1317	0.1674
9233	TAG54:8-FA22:6	Triacylglycerol	TAG Ester	54076	DMS-MS	100010224			1.0613	0.2986	0.149	0.4888	0.4475	0.1701	0.0855	0.3015	0.1926	0.6729	0.1046	0.0566	0.0732	0.4889	0.2915	1.836	0.8091	0.2593	0.7246	0.0857	0.6607	0.0626	0.1091	0.5981	0.2549	0.1527	0.5229	0.1023	0.471	0.1015	0.211	0.6338	0.2311	0.357	0.1752	0.4192	0.2136	0.9293	0.9412	0.172	0.1836
9256	TAG55:1-FA16:0	Triacylglycerol	TAG Ester	54267	DMS-MS	100010415			2.1691	0.4908	0.2715	0.7562	1.031	0.3444	0.12	0.6454	0.4658	1.2962	0.2463	0.1497	0.2144	0.9438	0.584	3.6533	1.1626	0.5886	1.9225	0.3466	1.2552	0.3742	0.3323	1.1408	0.4617	0.4777	1.3014	0.5224	0.8876	0.3286	0.4055	1.2284	0.5282	1.0373	0.4663	0.903	0.3969	1.8209	0.8329	0.3241	0.433
9260	TAG55:1-FA18:1	Triacylglycerol	TAG Ester	54610	DMS-MS	100010758			1.095	0.6791	0.2418	0.4129	0.4955	0.1892	0.1272	0.6283	0.485	0.5808	0.2545	0.1158	0.1878	0.5172	0.456	1.1961	0.8009	0.5918	0.9783	0.5115	1.0459	0.1668	0.1173	0.4645	0.2606	0.201	0.5933	0.4526	0.5783	0.2228	0.1889	0.4742	0.3206	0.3168	0.503	1.2887	0.5433	1.1012	0.5529	0.3355	0.3965
9274	TAG55:2-FA18:1	Triacylglycerol	TAG Ester	54268	DMS-MS	100010416			1.5887	1.5301	0.2874	0.3131	0.5095	0.0936	0.129	0.2856	0.4822	0.4142	0.2735	0.0765	0.1457	0.242	0.4706	0.7091	0.3448	0.9023	0.7819	0.4909	0.2447	0.096	0.1158	0.7457	0.3352	0.3126	0.6107	0.9068	0.3867	0.1327	0.2019	0.3448	0.2565	0.1793	0.1646	4.4775	0.7063	0.8337	0.8492	0.43	0.6943
9275	TAG55:2-FA18:2	Triacylglycerol	TAG Ester	53742	DMS-MS	100009890			0.4686	0.2089	0.1298	0.2245	0.3957	0.1244	0.0766	0.4105	0.4218	0.2857	0.1459	0.0865	0.1138	0.353	0.2232	0.7006	0.4905	0.2698	0.5976	0.3399	0.8937	0.1221	0.0818	0.279	0.1849	0.1095	0.3941	0.2536	0.2891	0.1218	0.1145	0.2705	0.1946	0.2472	0.3201	0.6894	0.2455	0.6322	0.3263	0.1599	0.1983
9287	TAG55:3-FA18:1	Triacylglycerol	TAG Ester	54077	DMS-MS	100010225			1.7623	1.9772	0.4606	0.592	0.899	0.1529	0.1879	0.48	0.6245	0.6554	0.3205	0.1479	0.2096	0.337	1.1487	0.9647	0.4292	1.0552	1.0575	1.0078	0.3747	0.1836	0.2256	1.3843	0.5044	0.5628	1.0175	1.7179	0.5128	0.2212	0.3786	0.5262	0.3987	0.2864	0.2469	9.6086	1.3524	1.3977	1.4196	0.5936	1.0038
9288	TAG55:3-FA18:2	Triacylglycerol	TAG Ester	53575	DMS-MS	100009723			0.4628	0.3792	0.1166	0.1673	0.3346	0.0546	0.0524	0.1885	0.3678	0.216	0.1043	0.052	0.0798	0.1689	0.204	0.367	0.2038	0.3529	0.384	0.2583	0.2083	0.0597	0.0648	0.4045	0.1864	0.1349	0.3637	0.4829	0.1495	0.0618	0.1	0.1767	0.1439	0.1285	0.1043	2.0522	0.3478	0.5269	0.4398	0.1625	0.2444
9300	TAG55:4-FA18:1	Triacylglycerol	TAG Ester	54611	DMS-MS	100010759			0.803	0.8215	0.2801	0.3991	0.6527	0.1299	0.1245	0.3629	0.4562	0.4754	0.1686	0.1346	0.1484	0.2739	0.7174	0.6806	0.3791	0.5349	0.7456	0.8154	0.3377	0.1527	0.1556	0.8206	0.324	0.3759	0.6737	1.0659	0.2795	0.1726	0.2793	0.3424	0.2714	0.238	0.2024	6.4035	0.8696	0.8922	0.8449	0.3559	0.5075
9301	TAG55:4-FA18:2	Triacylglycerol	TAG Ester	54078	DMS-MS	100010226			0.5401	0.4199	0.156	0.2427	0.5473	0.0731	0.0704	0.2566	0.4561	0.3119	0.1178	0.0805	0.0952	0.2006	0.4223	0.4413	0.2439	0.3852	0.5028	0.4693	0.2827	0.1018	0.1093	0.6237	0.2525	0.2131	0.5641	0.8378	0.2017	0.0902	0.1582	0.2274	0.1805	0.1871	0.1394	4.0416	0.5888	0.8621	0.6765	0.2268	0.3288
9315	TAG55:5-FA18:1	Triacylglycerol	TAG Ester	53912	DMS-MS	100010060			0.3406	0.3338	0.1643	0.2366	0.2553	0.1055	0.093	0.2217	0.3035	0.2986	0.1364	0.1014	0.1114	0.1996	0.2377	0.4553	0.2332	0.2549	0.3962	0.3514	0.1876	0.1123	0.1011	0.3034	0.1729	0.1741	0.4162	0.3189	0.1806	0.1245	0.1495	0.2149	0.1595	0.1449	0.15	1.7417	0.4389	0.4206	0.2969	0.1877	0.2492
9316	TAG55:5-FA18:2	Triacylglycerol	TAG Ester	53913	DMS-MS	100010061			0.2823	0.1932	0.1033	0.1549	0.3869	0.0514	0.0428	0.1748	0.3648	0.2123	0.0683	0.0635	0.0656	0.148	0.2534	0.3216	0.1957	0.2038	0.3285	0.3735	0.2288	0.0783	0.0676	0.3695	0.1653	0.1262	0.3972	0.4984	0.1068	0.066	0.1014	0.1442	0.1129	0.1531	0.0981	2.6558	0.4382	0.5941	0.3848	0.1245	0.1721
9322	TAG55:5-FA20:4	Triacylglycerol	TAG Ester	53914	DMS-MS	100010062			0.3529	0.3613	0.1788	0.2972	0.2103	0.0749	0.0665	0.243	0.4417	0.3352	0.2642	0.0378	0.0765	0.1993	0.1195	0.7352	0.0717	0.227	0.4021	0.1161	0.0984	0.1292	0.0721	0.2515	0.1513	0.0999	0.5703	0.2928	0.2011	0.0656	0.0993	0.2468	0.1904	0.1101	0.1424	0.3876	0.2946	0.5853	0.2148	0.1915	0.2892
9331	TAG55:6-FA18:1	Triacylglycerol	TAG Ester	53915	DMS-MS	100010063			1.108	1.0742	1.0539	1.0527	1.0379	0.9891	0.9733	1.0103	1.0434	1.0595	0.9882	0.9131	0.9773	1.054	1.0711	1.227	1.0906	1.0539	1.1871	1.04	1.1267	0.941	0.906	1.0193	0.9545	0.9945	1.0573	1.0479	1.0673	0.93	1.0041	0.9947	0.9485	0.9671	1.0964	1.1532	1.1507	1.2655	1.0275	0.9936	1.0212
9336	TAG55:6-FA20:3	Triacylglycerol	TAG Ester	54445	DMS-MS	100010593			1.6498	1.7524	1.7566	1.6819	1.6909	1.7	1.6922	1.692	1.6382	1.686	1.7078	1.5383	1.6576	1.7085	1.7072	1.7316	1.6763	1.7657	1.7609	1.726	1.7383	1.5693	1.5468	1.6746	1.5857	1.6883	1.6211	1.7096	1.6368	1.6737	1.6939	1.6228	1.6252	1.6278	1.8966	1.7826	1.6674	1.8006	1.7078	1.6189	1.6324
9337	TAG55:6-FA20:4	Triacylglycerol	TAG Ester	54269	DMS-MS	100010417			0.3442	0.3397	0.2338	0.3168	0.3216	0.1411	0.1351	0.3313	0.4946	0.3633	0.295	0.1129	0.1515	0.2808	0.1869	0.7079	0.1611	0.2589	0.434	0.2027	0.1892	0.1946	0.1352	0.2972	0.2272	0.1464	0.5038	0.3111	0.2275	0.1306	0.1546	0.2661	0.2338	0.1867	0.2562	0.4103	0.3211	0.5743	0.2834	0.243	0.33
9342	TAG55:7-FA15:0	Triacylglycerol	TAG Ester	54270	DMS-MS	100010418			0.17	0.1458	0.0766	0.1635	0.0781	0.0645	0.0614	0.0828	0.1303	0.1247	0.0802	0.0484	0.091	0.0918	0.1111	0.2244	0.107	0.1737	0.2877	0.0714	0.0969	0.046	0.0221	0.1217	0.0602	0.1113	0.1727	0.1582	0.1021	0.0811	0.0585	0.1467	0.0682	0.0758	0.1537	0.1731	0.1268	0.229	0.1347	0.1239	0.1186
9345	TAG55:7-FA18:1	Triacylglycerol	TAG Ester	53916	DMS-MS	100010064			1.3421	0.8325	0.6256	0.658	0.6827	0.5321	0.5382	0.6043	0.6672	0.728	0.7044	0.4989	0.5565	0.6196	0.6491	0.8517	0.6338	1.0915	0.9397	0.6096	0.6318	0.5081	0.5065	0.8836	0.6225	0.6042	0.8006	1.1857	0.6932	0.5328	0.5921	0.7326	0.5744	0.6105	0.6432	1.0913	0.741	0.87	0.8238	0.7369	0.8343
9349	TAG55:7-FA20:3	Triacylglycerol	TAG Ester	53576	DMS-MS	100009724			0.228	0.2285	0.2245	0.2166	0.2208	0.2079	0.2162	0.2196	0.2204	0.2157	0.214	0.1998	0.2163	0.2209	0.2162	0.2217	0.214	0.2242	0.2405	0.207	0.2286	0.1976	0.1887	0.2165	0.2058	0.2135	0.2131	0.2158	0.211	0.2078	0.2146	0.216	0.2068	0.203	0.2327	0.2193	0.2161	0.2261	0.2132	0.2178	0.215
9350	TAG55:7-FA20:4	Triacylglycerol	TAG Ester	53917	DMS-MS	100010065			2.4626	2.5355	2.6092	2.4568	2.5779	2.4232	2.422	2.498	2.5434	2.4918	2.5073	2.3345	2.5081	2.4674	2.5285	2.6399	2.4485	2.6314	2.6057	2.4108	2.528	2.3303	2.1949	2.4885	2.4038	2.509	2.411	2.4922	2.4503	2.4345	2.4088	2.4021	2.4405	2.4293	2.7762	2.5306	2.4264	2.6348	2.4923	2.4667	2.4451
9354	TAG55:7-FA22:6	Triacylglycerol	TAG Ester	54271	DMS-MS	100010419			0.4682	0.1963	0.0948	0.2228	0.1628	0.0814	0.0437	0.1284	0.1294	0.3965	0.0696	0.0249	0.0588	0.1978	0.1325	0.8406	0.2157	0.0847	0.3945	0.0463	0.174	0.0554	0.0669	0.2325	0.1372	0.0919	0.3661	0.0903	0.2717	0.063	0.1184	0.2836	0.0773	0.1601	0.0551	0.1992	0.1563	0.4941	0.1441	0.0804	0.1311
9360	TAG55:8-FA20:4	Triacylglycerol	TAG Ester	53743	DMS-MS	100009891			0.303	0.3181	0.319	0.2939	0.3166	0.2895	0.304	0.3115	0.3341	0.3181	0.3123	0.2838	0.2937	0.3028	0.2982	0.3447	0.2968	0.3052	0.3239	0.2767	0.3044	0.2769	0.2632	0.2965	0.2952	0.2974	0.2941	0.2992	0.2985	0.2855	0.2855	0.306	0.2916	0.289	0.3568	0.301	0.3001	0.3382	0.3003	0.2956	0.3074
9375	TAG56:1-FA16:0	Triacylglycerol	TAG Ester	53401	DMS-MS	100009549			0.3425	0.1003	0.0584	0.0941	0.4443	0.0177	0.0351	0.0423	0.0559	0.1308	0.0887	0.0197	0.0339	0.0624	0.2529	0.195	0.0704	0.3144	0.2239	0.1419	0.0498	0.0207	0.022	0.3605	0.0921	0.0633	0.1186	0.1515	0.0618	0.0337	0.0391	0.1284	0.2648	0.0496	0.0397	0.4615	0.0844	0.1483	0.1837	0.069	0.104
9379	TAG56:1-FA18:1	Triacylglycerol	TAG Ester	54080	DMS-MS	100010228			0.8032	0.3919	0.1895	0.2299	0.6675	0.0875	0.1297	0.1775	0.2041	0.2469	0.2222	0.084	0.1305	0.1656	0.469	0.2726	0.2204	0.4977	0.4808	0.3153	0.2059	0.0827	0.0874	0.5992	0.2362	0.168	0.2343	0.5514	0.2499	0.1157	0.1201	0.2289	0.311	0.1455	0.1185	1.5504	0.2933	0.316	0.4699	0.2353	0.275
9390	TAG56:10-FA18:2	Triacylglycerol	TAG Ester	54079	DMS-MS	100010227			0.4171	0.3168	0.0989	0.1376	0.2866	0.0469	0.0443	0.1601	0.3246	0.1835	0.105	0.0434	0.0711	0.1488	0.1841	0.337	0.1868	0.3221	0.3405	0.2252	0.1943	0.0565	0.0543	0.3284	0.1496	0.1225	0.3135	0.4265	0.1326	0.0487	0.0894	0.1476	0.1253	0.1147	0.1006	1.8508	0.3233	0.4682	0.3961	0.1486	0.2217
9414	TAG56:2-FA16:0	Triacylglycerol	TAG Ester	53402	DMS-MS	100009550			0.3288	0.1057	0.0771	0.1132	0.4321	0.0275	0.034	0.0688	0.0797	0.2127	0.0749	0.0349	0.0439	0.1198	0.2713	0.3349	0.1571	0.3015	0.194	0.1335	0.0609	0.0281	0.0324	0.4328	0.0977	0.1159	0.1975	0.1361	0.0769	0.0395	0.0681	0.1735	0.2097	0.0698	0.045	0.3447	0.0992	0.2627	0.1976	0.0742	0.1407
9416	TAG56:2-FA18:0	Triacylglycerol	TAG Ester	54272	DMS-MS	100010420			0.5333	0.3228	0.1674	0.1767	0.3409	0.0463	0.0591	0.141	0.1483	0.2425	0.1296	0.0493	0.0844	0.1373	0.35	0.276	0.1723	0.4839	0.3977	0.2149	0.1066	0.0569	0.0695	0.6678	0.1731	0.148	0.3296	0.5131	0.1647	0.0682	0.1195	0.2512	0.1517	0.1205	0.0789	0.963	0.2491	0.3116	0.3412	0.1628	0.2937
9417	TAG56:2-FA18:1	Triacylglycerol	TAG Ester	53577	DMS-MS	100009725			2.4056	2.1164	1.0276	0.999	2.075	0.537	0.6862	0.9103	0.8582	1.0799	0.7914	0.5686	0.6683	0.7521	1.8799	1.1801	1.0977	1.6908	1.7151	1.5085	0.7668	0.5109	0.6002	1.9677	1.0637	1.0134	1.0702	1.6148	0.9456	0.6512	0.777	1.0144	1.0129	0.6709	0.6349	7.5376	1.249	1.4124	1.8295	0.956	1.2158
9419	TAG56:2-FA20:0	Triacylglycerol	TAG Ester	54273	DMS-MS	100010421			1.1254	0.9435	0.3023	0.3192	0.916	0.0889	0.185	0.3279	0.3206	0.3519	0.2458	0.0821	0.1625	0.1634	0.6922	0.305	0.3548	0.6775	0.7274	0.6415	0.2471	0.0766	0.1788	0.6772	0.3907	0.3572	0.3333	0.6785	0.2835	0.1353	0.2123	0.2579	0.3431	0.1649	0.1149	4.67	0.4531	0.4646	0.9362	0.3255	0.4038
9420	TAG56:2-FA20:1	Triacylglycerol	TAG Ester	53403	DMS-MS	100009551			0.4412	0.3657	0.1808	0.1871	0.2938	0.0559	0.0612	0.1266	0.1229	0.2386	0.1096	0.0615	0.0794	0.1302	0.3834	0.2565	0.1906	0.3819	0.3551	0.2327	0.0876	0.0629	0.0914	0.6725	0.1606	0.1776	0.2918	0.4225	0.1631	0.0848	0.127	0.2232	0.1466	0.1035	0.0848	1.0291	0.2378	0.3027	0.3084	0.1672	0.2939
9426	TAG56:3-FA16:0	Triacylglycerol	TAG Ester	54612	DMS-MS	100010760			0.2542	0.0925	0.0727	0.111	0.1721	0.0274	0.0258	0.0732	0.0712	0.1942	0.0588	0.0412	0.0383	0.1178	0.1493	0.2812	0.0977	0.237	0.145	0.0878	0.0499	0.0331	0.0276	0.4851	0.0803	0.1022	0.1929	0.1196	0.063	0.0337	0.0672	0.1648	0.1106	0.0607	0.0531	0.1423	0.1049	0.2057	0.1184	0.0742	0.131
9428	TAG56:3-FA18:0	Triacylglycerol	TAG Ester	54613	DMS-MS	100010761			0.6042	0.3228	0.1946	0.2974	0.3046	0.0845	0.0605	0.2288	0.1952	0.3289	0.1378	0.1026	0.1057	0.2583	0.3367	0.4105	0.2045	0.5383	0.5164	0.2414	0.1798	0.1051	0.1006	0.9551	0.224	0.2398	0.55	0.4814	0.2189	0.0967	0.2232	0.3956	0.2162	0.1923	0.1492	0.7045	0.3024	0.4177	0.4629	0.1902	0.3486
9429	TAG56:3-FA18:1	Triacylglycerol	TAG Ester	54446	DMS-MS	100010594			2.3657	2.9361	1.298	1.3523	2.2791	0.4242	0.4522	1.0724	0.7517	1.4256	0.4839	0.5949	0.4779	0.7592	3.0299	1.3744	1.6884	1.8494	2.0912	2.1193	0.746	0.4212	0.6375	4.0753	1.1647	1.6448	1.6465	2.0354	1.0743	0.6574	1.0156	1.2419	1.1387	0.6212	0.7131	10.6834	1.798	1.779	2.5131	0.9926	1.6804
9430	TAG56:3-FA18:2	Triacylglycerol	TAG Ester	53404	DMS-MS	100009552			0.6805	0.3847	0.2173	0.2807	0.9284	0.0785	0.1089	0.2863	0.373	0.3557	0.1572	0.0959	0.1283	0.2411	0.6204	0.4055	0.4246	0.589	0.5736	0.5398	0.3085	0.0861	0.1249	0.8775	0.3362	0.2819	0.4001	0.5378	0.2254	0.1157	0.1974	0.3017	0.3538	0.2109	0.1326	3.2853	0.2916	0.4971	0.8194	0.2196	0.3127
9432	TAG56:3-FA20:0	Triacylglycerol	TAG Ester	53405	DMS-MS	100009553			0.5423	0.3873	0.1729	0.2253	0.8467	0.0709	0.108	0.2771	0.3483	0.2565	0.135	0.0751	0.1149	0.1496	0.5133	0.239	0.3524	0.4739	0.5054	0.5289	0.2978	0.0672	0.136	0.488	0.3189	0.2295	0.2633	0.4156	0.1765	0.1006	0.166	0.1997	0.2919	0.165	0.1099	3.8141	0.2499	0.3736	0.8345	0.1907	0.2353
9433	TAG56:3-FA20:1	Triacylglycerol	TAG Ester	53578	DMS-MS	100009726			1.1322	1.617	0.7113	0.7029	1.0816	0.2089	0.2138	0.5254	0.3547	0.7037	0.2112	0.3201	0.2234	0.3932	1.6455	0.6627	0.9512	0.8676	1.0214	1.05	0.3309	0.2316	0.3551	2.2922	0.5745	0.871	0.824	1.0428	0.5934	0.3486	0.5476	0.5796	0.5467	0.3047	0.3643	5.2629	0.9269	0.954	1.2687	0.5148	0.8645
9434	TAG56:3-FA20:2	Triacylglycerol	TAG Ester	53579	DMS-MS	100009727			0.2929	0.2212	0.1395	0.1818	0.1302	0.0617	0.0475	0.1526	0.1121	0.2227	0.0755	0.0732	0.0773	0.1428	0.1987	0.2143	0.0979	0.3245	0.2647	0.1595	0.1059	0.0634	0.0559	0.6607	0.1133	0.1458	0.2803	0.2383	0.1313	0.071	0.1292	0.2316	0.125	0.1039	0.1027	0.2755	0.2183	0.2264	0.2381	0.1268	0.2065
9440	TAG56:4-FA16:0	Triacylglycerol	TAG Ester	54614	DMS-MS	100010762			0.3959	0.2355	0.1409	0.2268	0.1741	0.0657	0.0473	0.1543	0.1221	0.4193	0.124	0.0694	0.062	0.1783	0.1635	0.4602	0.0621	0.435	0.2869	0.1363	0.0825	0.0871	0.0502	0.831	0.1406	0.1119	0.4343	0.2454	0.1194	0.0597	0.1016	0.362	0.1645	0.1069	0.1392	0.2295	0.242	0.3557	0.2317	0.1702	0.2531
9443	TAG56:4-FA18:0	Triacylglycerol	TAG Ester	53406	DMS-MS	100009554			1.3075	0.6946	0.3576	0.7838	0.4973	0.2023	0.107	0.6043	0.3819	0.6893	0.2863	0.2036	0.1924	0.5695	0.41	0.9437	0.3386	0.8438	1.1285	0.4013	0.3993	0.2985	0.2224	1.284	0.3683	0.4566	1.301	0.9092	0.4538	0.227	0.406	0.9096	0.4156	0.4185	0.4014	0.9813	0.6617	0.8711	0.9223	0.4028	0.6124
9444	TAG56:4-FA18:1	Triacylglycerol	TAG Ester	53744	DMS-MS	100009892			2.639	2.6143	1.2727	1.9218	1.6484	0.5711	0.4009	1.7141	0.8861	1.8115	0.4769	0.8393	0.5353	1.2084	2.4391	1.8975	1.5638	1.9611	2.516	2.173	1.0665	0.6358	0.6801	5.7515	1.1587	1.8402	2.5703	2.2499	1.3201	0.7013	1.3199	1.8148	1.1639	0.8805	1.2404	6.0761	1.9487	2.156	2.9725	1.2276	1.8101
9445	TAG56:4-FA18:2	Triacylglycerol	TAG Ester	53745	DMS-MS	100009893			0.9098	0.7385	0.4105	0.6186	1.2265	0.1908	0.1449	0.6032	0.5647	0.6083	0.1692	0.3165	0.2132	0.4713	1.2619	0.6857	0.9424	0.7529	0.951	1.0633	0.5636	0.2268	0.2927	2.1008	0.5677	0.655	0.8368	0.9552	0.4935	0.2343	0.4656	0.5075	0.5187	0.4039	0.3762	4.6094	0.5423	0.8633	1.3779	0.4192	0.5544
9448	TAG56:4-FA20:1	Triacylglycerol	TAG Ester	54274	DMS-MS	100010422			0.7412	0.7582	0.403	0.5332	0.957	0.1766	0.1336	0.5252	0.3896	0.5145	0.1245	0.3112	0.1845	0.3866	1.1977	0.5472	0.9145	0.5903	0.8345	1.0177	0.3899	0.2125	0.3003	2.0757	0.4996	0.6803	0.6708	0.8423	0.4806	0.25	0.4238	0.4226	0.4426	0.283	0.3632	4.4045	0.5158	0.783	1.2339	0.3762	0.5174
9449	TAG56:4-FA20:2	Triacylglycerol	TAG Ester	53580	DMS-MS	100009728			0.7292	0.9021	0.4689	0.6423	0.3448	0.2013	0.1529	0.5822	0.277	0.7251	0.1616	0.2943	0.2253	0.4362	0.7638	0.5279	0.3898	0.7449	0.7427	0.7191	0.3419	0.1904	0.1931	2.0925	0.3601	0.5791	0.7799	0.6732	0.4234	0.2552	0.4175	0.5584	0.3611	0.2765	0.4433	1.0358	0.7574	0.5901	0.9278	0.4258	0.6047
9450	TAG56:4-FA20:3	Triacylglycerol	TAG Ester	53746	DMS-MS	100009894			1.0536	0.8316	0.3771	0.7475	0.4207	0.2017	0.1181	0.6753	0.3871	0.7251	0.2553	0.1967	0.2123	0.5046	0.4134	0.8404	0.2964	0.7557	0.9258	0.4723	0.3409	0.2568	0.1712	0.9797	0.2999	0.41	1.073	0.7562	0.4124	0.2522	0.3521	0.8296	0.4099	0.3505	0.4397	0.9512	0.9266	0.8045	0.8187	0.4193	0.5482
9451	TAG56:4-FA20:4	Triacylglycerol	TAG Ester	54615	DMS-MS	100010763			0.7901	0.4658	0.2686	0.5596	0.3189	0.1787	0.1036	0.4344	0.3434	0.5359	0.2718	0.102	0.1727	0.4007	0.2441	0.6878	0.225	0.5677	0.8869	0.2732	0.2508	0.3251	0.2142	0.3677	0.248	0.275	0.7803	0.7515	0.3982	0.2141	0.2304	0.5077	0.3127	0.2411	0.3776	0.6939	0.5247	0.5291	0.6426	0.3017	0.4062
9453	TAG56:4-FA22:4	Triacylglycerol	TAG Ester	53918	DMS-MS	100010066			0.2708	0.1492	0.087	0.1383	0.1001	0.0359	0.0319	0.087	0.0752	0.2234	0.0962	0.0326	0.0373	0.0906	0.0721	0.3271	0.0327	0.2649	0.1788	0.0636	0.0501	0.0691	0.0382	0.2946	0.0821	0.0642	0.2904	0.1763	0.0847	0.0365	0.0564	0.2253	0.0983	0.0686	0.0979	0.1351	0.111	0.246	0.1103	0.1059	0.1683
9457	TAG56:5-FA16:0	Triacylglycerol	TAG Ester	54616	DMS-MS	100010764			1.8959	1.1319	0.5779	1.0594	0.7003	0.3183	0.2156	0.7087	0.5058	1.5233	0.489	0.2837	0.2278	0.7348	0.5548	2.429	0.311	1.3611	1.6056	0.6295	0.4637	0.4914	0.3511	2.4593	0.6092	0.5257	2.1219	1.2555	0.6358	0.2835	0.4468	1.5509	0.6245	0.4729	0.7518	1.0297	0.7983	1.8312	1.0507	0.7982	1.0875
9460	TAG56:5-FA18:0	Triacylglycerol	TAG Ester	53919	DMS-MS	100010067			2.1898	1.3336	0.6488	1.6086	0.9721	0.4839	0.2397	1.4066	0.8128	1.3114	0.5146	0.3514	0.4013	1.1726	0.7636	2.0365	0.7393	1.1854	2.378	0.8493	0.8274	0.8685	0.6211	1.3449	0.6444	0.9032	2.2679	1.6471	1.0476	0.5804	0.7094	1.5151	0.7382	0.7102	0.986	2.0411	1.0858	1.6446	1.8663	0.7985	0.992
9461	TAG56:5-FA18:1	Triacylglycerol	TAG Ester	53920	DMS-MS	100010068			4.631	4.4355	1.8687	3.6456	1.986	1.105	0.6653	3.3562	1.6678	3.4644	1.1067	1.1466	0.8966	2.3459	2.4614	4.4907	1.897	3.0016	4.8149	2.8357	1.8452	1.5846	1.2072	6.1928	1.6695	2.3335	5.2348	3.6893	2.2847	1.2699	1.6934	3.4971	1.8263	1.4937	2.7195	5.2578	3.3945	4.0283	4.293	2.2415	2.9485
9462	TAG56:5-FA18:2	Triacylglycerol	TAG Ester	54275	DMS-MS	100010423			1.2097	0.7352	0.4313	0.925	1.0473	0.289	0.1545	1.025	0.7165	0.8088	0.2246	0.4471	0.2695	0.8017	1.0477	1.0698	0.8784	0.7849	1.4541	1.2056	0.8513	0.3883	0.3568	2.7899	0.6777	0.7511	1.4747	1.1713	0.6342	0.2936	0.5857	0.9236	0.551	0.601	0.6861	2.7029	0.6503	1.1903	1.6441	0.5545	0.7138
9465	TAG56:5-FA20:1	Triacylglycerol	TAG Ester	54447	DMS-MS	100010595			0.271	0.2029	0.1196	0.1939	0.3411	0.0681	0.0455	0.2045	0.2553	0.2042	0.0537	0.1195	0.0696	0.1792	0.3889	0.2696	0.4249	0.2236	0.3516	0.4132	0.2064	0.0885	0.1127	0.7361	0.2351	0.2122	0.3483	0.3121	0.1744	0.0858	0.1451	0.1762	0.1604	0.1408	0.188	1.2123	0.1892	0.3761	0.4188	0.1317	0.1628
9466	TAG56:5-FA20:2	Triacylglycerol	TAG Ester	53407	DMS-MS	100009555			0.5416	0.5047	0.2896	0.481	0.3088	0.1607	0.1088	0.5627	0.3113	0.4884	0.1075	0.283	0.1712	0.3924	0.6045	0.4385	0.3531	0.5105	0.6575	0.7557	0.4062	0.1771	0.1609	1.8176	0.3414	0.4377	0.5881	0.5205	0.326	0.1837	0.3232	0.3921	0.2963	0.254	0.4569	0.9079	0.415	0.4881	0.8558	0.3448	0.3994
9467	TAG56:5-FA20:3	Triacylglycerol	TAG Ester	54448	DMS-MS	100010596			1.9161	2.6942	1.1259	1.6926	0.9362	0.574	0.3883	2.1989	1.0783	1.9769	0.5405	0.6078	0.5636	1.1276	1.2866	1.8261	0.796	1.5803	2.0108	1.7438	0.877	0.62	0.3616	2.3263	0.7906	0.9709	2.2104	1.634	0.9768	0.677	0.7414	1.7276	1.0056	0.7708	1.4951	2.7234	2.8497	1.7945	2.0359	1.2427	1.4373
9468	TAG56:5-FA20:4	Triacylglycerol	TAG Ester	54449	DMS-MS	100010597			5.525	4.3249	1.9768	4.5437	2.3718	1.3842	0.7354	4.074	2.372	4.0221	1.5079	0.853	1.1318	2.9505	2.154	4.9936	1.7847	2.9554	6.3895	2.4328	1.7861	2.7416	1.8492	2.8711	1.515	2.4542	5.4769	4.952	3.0558	1.7739	1.8856	3.6045	2.2264	1.6213	3.037	6.3439	3.2892	3.9857	5.142	2.355	2.7205
9471	TAG56:5-FA22:4	Triacylglycerol	TAG Ester	54276	DMS-MS	100010424			2.137	1.312	0.6983	1.1856	0.7599	0.3606	0.2638	0.8049	0.5371	1.842	0.5903	0.2869	0.2708	0.7782	0.6221	2.5752	0.2736	1.4343	1.5607	0.6307	0.4152	0.6401	0.3825	2.4618	0.6664	0.6298	2.3268	1.5506	0.6633	0.3325	0.49	1.7518	0.7287	0.4777	0.8634	1.1288	0.9468	1.8897	1.0659	0.9274	1.2498
9472	TAG56:5-FA22:5	Triacylglycerol	TAG Ester	53581	DMS-MS	100009729			0.9194	0.4544	0.2308	0.4573	0.3072	0.1384	0.0839	0.2965	0.2049	0.9146	0.1946	0.1097	0.1228	0.3932	0.2638	1.1743	0.2573	0.6148	0.9405	0.225	0.3089	0.2151	0.1654	0.6162	0.2425	0.3144	0.9503	0.4687	0.3943	0.1359	0.205	0.7042	0.2294	0.2383	0.321	0.4575	0.3729	0.9386	0.416	0.2752	0.4295
9476	TAG56:6-FA16:0	Triacylglycerol	TAG Ester	54617	DMS-MS	100010765			4.2902	2.205	0.9849	2.1939	1.528	0.7867	0.3986	1.6162	1.1069	2.6929	0.7611	0.5532	0.546	1.8421	1.2378	5.9402	1.6177	2.0617	4.878	1.5932	1.9322	1.0353	1.0189	3.2411	1.2348	1.3746	4.7422	2.3244	1.9353	0.6464	1.0377	3.0008	1.0908	1.2274	1.7136	2.3182	1.7045	4.6644	2.4966	1.5109	1.9642
9479	TAG56:6-FA18:0	Triacylglycerol	TAG Ester	53921	DMS-MS	100010069			1.3544	0.5551	0.3033	0.8704	0.7596	0.2833	0.1172	0.9309	0.5901	0.7486	0.2773	0.1864	0.2331	0.8169	0.475	1.6082	0.608	0.6626	1.7045	0.5635	0.7326	0.5476	0.3521	0.7076	0.4199	0.4093	1.2584	0.938	0.6938	0.3135	0.3672	0.862	0.4342	0.4915	0.6225	1.2519	0.5235	1.134	1.1203	0.4153	0.4736
9480	TAG56:6-FA18:1	Triacylglycerol	TAG Ester	54277	DMS-MS	100010425			6.1289	5.8838	2.2302	4.2141	2.6056	1.4759	1.0424	4.3723	2.4702	4.618	1.6885	1.1892	1.1836	3.0221	2.6577	7.6223	2.8771	3.3268	7.2126	3.7622	3.0798	2.0344	1.5067	5.1274	1.9624	2.4438	6.7399	4.0995	3.2092	1.5434	1.8339	4.2483	2.4629	2.092	3.8664	6.9316	3.9481	6.8992	5.2676	3.0009	3.5433
9481	TAG56:6-FA18:2	Triacylglycerol	TAG Ester	54081	DMS-MS	100010229			2.1357	1.3953	0.7108	1.6602	1.5346	0.5502	0.2818	2.0812	1.2491	1.5181	0.5354	0.6061	0.441	1.4715	1.1747	2.5288	1.0851	1.2107	2.9039	1.7074	1.3916	0.9989	0.6367	3.1251	1.044	0.9616	2.7416	2.0018	1.084	0.577	0.8114	1.7829	0.9194	1.0037	1.4807	2.7461	1.0515	2.0906	2.5074	1.0838	1.2375
9482	TAG56:6-FA18:3	Triacylglycerol	TAG Ester	53747	DMS-MS	100009895			0.2309	0.1618	0.0723	0.1544	0.1118	0.0512	0.0278	0.1828	0.1453	0.1463	0.0528	0.0714	0.0502	0.1634	0.1611	0.2613	0.2145	0.1419	0.2696	0.2178	0.1142	0.0485	0.0584	0.3852	0.1334	0.0972	0.2989	0.1339	0.0893	0.0665	0.0788	0.1715	0.1088	0.0937	0.1653	0.2675	0.1425	0.2196	0.1986	0.103	0.1205
9485	TAG56:6-FA20:2	Triacylglycerol	TAG Ester	54082	DMS-MS	100010230			0.2261	0.1736	0.102	0.1978	0.1654	0.0727	0.0475	0.2506	0.1856	0.2189	0.0593	0.1135	0.0786	0.1995	0.2178	0.2224	0.1861	0.2154	0.2959	0.3387	0.1998	0.0818	0.0659	0.677	0.1599	0.1431	0.2955	0.2023	0.1248	0.0885	0.121	0.1868	0.1392	0.1312	0.2154	0.3514	0.1525	0.2324	0.3235	0.1424	0.1475
9486	TAG56:6-FA20:3	Triacylglycerol	TAG Ester	53408	DMS-MS	100009556			1.1437	1.4654	0.6972	1.1678	0.8044	0.4391	0.2729	1.9746	1.0523	1.3295	0.3949	0.4838	0.4374	0.9321	0.9547	1.3424	0.6567	1.009	1.6151	1.6557	0.8909	0.5414	0.2525	1.8007	0.6863	0.6708	1.5125	1.1032	0.6554	0.4857	0.4935	1.1193	0.8198	0.6475	1.3219	2.1614	1.4423	1.3865	1.6307	0.9365	0.8915
9487	TAG56:6-FA20:4	Triacylglycerol	TAG Ester	54618	DMS-MS	100010766			7.3535	8.8279	3.5928	6.4445	4.7212	2.2306	1.7305	7.2515	4.6532	6.7976	2.9442	1.3943	1.901	4.3575	3.584	9.1348	2.8632	4.596	8.8934	5.2862	3.2834	4.1434	1.9741	5.2033	2.7328	2.9541	7.2392	6.9711	3.985	2.5155	2.2781	4.8112	4.2702	2.9846	5.919	12.1221	5.6547	7.554	7.808	4.3272	5.0891
9488	TAG56:6-FA20:5	Triacylglycerol	TAG Ester	54278	DMS-MS	100010426			1.0871	0.3907	0.1824	0.3399	0.3895	0.1324	0.0812	0.5296	0.3048	0.4248	0.2047	0.0666	0.161	0.4665	0.3934	1.2133	0.7658	0.4794	1.0711	0.307	1.0404	0.1299	0.0888	0.2031	0.1262	0.1401	0.5969	0.2514	0.5801	0.1783	0.0973	0.4333	0.1991	0.2393	0.3468	0.7539	0.5782	1.1774	0.4058	0.2007	0.2587
9490	TAG56:6-FA22:4	Triacylglycerol	TAG Ester	53922	DMS-MS	100010070			1.3393	0.5578	0.377	0.6917	0.6835	0.2268	0.1454	0.5939	0.4495	0.9453	0.3097	0.211	0.1676	0.6081	0.4282	1.8048	0.2263	0.7899	1.209	0.5209	0.407	0.4635	0.2746	1.6233	0.491	0.377	1.532	0.9876	0.4287	0.2028	0.3199	1.1247	0.4416	0.4154	0.6365	0.7634	0.4497	1.1332	0.8215	0.5607	0.7561
9491	TAG56:6-FA22:5	Triacylglycerol	TAG Ester	54083	DMS-MS	100010231			6.589	3.7115	1.6922	3.7134	2.2433	1.2585	0.6673	2.5934	1.4506	7.0345	1.0266	0.9605	0.8918	3.1097	2.228	8.6084	2.418	2.941	7.0324	2.0677	2.7923	1.8983	1.5633	4.6033	1.6051	2.926	6.8662	3.5355	3.1185	1.2042	1.7743	4.7885	1.5262	1.7884	2.6393	3.7232	3.0745	6.8416	3.6001	2.1907	3.0318
9492	TAG56:6-FA22:6	Triacylglycerol	TAG Ester	53582	DMS-MS	100009730			2.5009	0.6221	0.2973	0.7692	0.654	0.2915	0.1195	0.4045	0.3084	1.5868	0.2615	0.0857	0.2059	0.7583	0.5678	3.4946	0.9229	0.7797	1.8323	0.2008	0.7408	0.2661	0.2317	1.0311	0.4532	0.4261	1.1943	0.4672	0.8696	0.3274	0.4014	1.293	0.5465	0.793	0.3549	0.6786	0.5313	1.8403	0.6581	0.2725	0.4368
9496	TAG56:7-FA16:0	Triacylglycerol	TAG Ester	53748	DMS-MS	100009896			5.2143	1.6042	0.7506	2.1077	1.832	0.8574	0.3272	1.6591	1.0452	3.2521	0.583	0.4548	0.5537	2.1726	1.4888	7.7219	2.4011	1.4196	5.219	1.2296	2.703	0.9634	1.0019	2.8125	1.1629	1.3474	3.7699	1.7517	2.2496	0.8617	1.1288	2.995	1.0999	1.7958	1.4054	2.3013	1.2878	4.5509	2.2669	1.0384	1.3302
9497	TAG56:7-FA16:1	Triacylglycerol	TAG Ester	53583	DMS-MS	100009731			0.3196	0.212	0.1056	0.2221	0.1407	0.0893	0.0396	0.2106	0.0849	0.2982	0.0586	0.0735	0.0583	0.2205	0.1397	0.3787	0.2138	0.2184	0.369	0.1746	0.2469	0.0731	0.0946	0.2988	0.0888	0.1064	0.3468	0.1409	0.2097	0.0745	0.1209	0.2635	0.085	0.0978	0.247	0.2043	0.216	0.37	0.2422	0.1305	0.1723
9498	TAG56:7-FA18:0	Triacylglycerol	TAG Ester	53749	DMS-MS	100009897			0.3924	0.1446	0.0558	0.1598	0.1518	0.0532	0.0319	0.1771	0.1558	0.1523	0.0811	0.0404	0.0585	0.2009	0.1151	0.4041	0.2158	0.2013	0.3988	0.1167	0.3024	0.0627	0.0573	0.1379	0.0806	0.0624	0.2618	0.2344	0.168	0.074	0.0532	0.1928	0.0814	0.1008	0.1434	0.2831	0.1326	0.3194	0.1665	0.1132	0.1187
9499	TAG56:7-FA18:1	Triacylglycerol	TAG Ester	53584	DMS-MS	100009732			4.707	2.6074	1.1205	2.3832	1.9785	0.9362	0.5502	2.6781	1.6801	3.3672	0.9033	0.5456	0.7465	2.1278	1.9101	6.4028	2.7954	1.7897	4.4477	1.8726	2.7062	1.1993	0.7356	2.6479	1.1602	1.2343	3.162	1.8381	2.3696	1.0426	1.0657	2.6264	1.5734	1.7174	2.1589	4.0617	2.1161	4.6294	2.6224	1.3607	1.6198
9500	TAG56:7-FA18:2	Triacylglycerol	TAG Ester	53409	DMS-MS	100009557			2.8488	1.7812	0.911	1.9268	2.0015	0.7811	0.4264	2.5791	1.9051	1.9934	0.7929	0.6365	0.58	1.8906	1.3189	4.4213	1.7267	1.361	4.376	2.2178	2.5035	1.2343	0.8259	2.6162	1.2798	1.0465	3.594	2.201	1.5323	0.6736	0.8549	2.1594	1.2108	1.4328	2.1158	3.6653	1.3284	3.6854	2.6928	1.4033	1.5282
9501	TAG56:7-FA18:3	Triacylglycerol	TAG Ester	53585	DMS-MS	100009733			0.3884	0.2855	0.1086	0.2541	0.1589	0.0806	0.0476	0.3529	0.2581	0.2442	0.1281	0.091	0.0749	0.2806	0.1713	0.5754	0.2496	0.2114	0.4522	0.3062	0.1855	0.0952	0.0965	0.3824	0.1719	0.1108	0.4971	0.1868	0.1432	0.1196	0.1049	0.2957	0.1822	0.1487	0.3528	0.4105	0.2446	0.4373	0.2743	0.1805	0.188
9505	TAG56:7-FA20:3	Triacylglycerol	TAG Ester	53410	DMS-MS	100009558			0.4859	0.4944	0.2337	0.434	0.3994	0.1762	0.1089	0.8476	0.6266	0.536	0.2017	0.2081	0.1833	0.451	0.3408	0.7104	0.3186	0.4068	0.6927	0.7685	0.4226	0.2302	0.0887	0.6852	0.3247	0.2154	0.7001	0.4114	0.2413	0.2025	0.1793	0.5227	0.3798	0.2832	0.648	0.8353	0.5333	0.7139	0.5991	0.3479	0.3203
9506	TAG56:7-FA20:4	Triacylglycerol	TAG Ester	53750	DMS-MS	100009898			4.2279	4.3898	2.233	3.7186	3.6834	1.506	1.2033	5.5786	4.4719	4.4272	2.1328	1.033	1.2763	2.9624	2.3682	6.759	2.0442	2.6973	5.6389	4.2758	2.6524	3.051	1.002	3.6525	2.2177	1.5297	4.2954	4.1764	2.3171	1.4685	1.2713	3.0032	3.3479	2.3647	4.7012	8.94	2.9596	5.445	5.2786	2.9406	3.1059
9507	TAG56:7-FA20:5	Triacylglycerol	TAG Ester	54279	DMS-MS	100010427			2.2077	1.3689	0.5759	0.7716	1.1226	0.4385	0.3014	1.7673	0.9643	1.1629	0.5393	0.2217	0.4315	1.2777	1.2592	3.1892	2.5568	1.0177	2.6225	1.223	3.317	0.3655	0.1811	0.4848	0.3663	0.393	1.3362	0.6392	1.6652	0.5422	0.2807	0.962	0.5646	0.6909	1.2396	2.607	1.6358	3.2211	1.1255	0.6233	0.7285
9509	TAG56:7-FA22:4	Triacylglycerol	TAG Ester	54084	DMS-MS	100010232			0.2046	0.0966	0.0477	0.1051	0.0902	0.0391	0.0201	0.1102	0.0746	0.1357	0.0416	0.0425	0.0279	0.1175	0.069	0.288	0.0581	0.1125	0.216	0.0976	0.0842	0.0539	0.0489	0.2231	0.0767	0.055	0.2443	0.1126	0.0703	0.0345	0.0564	0.1871	0.0576	0.0631	0.1359	0.125	0.0708	0.2005	0.1204	0.0887	0.106
9510	TAG56:7-FA22:5	Triacylglycerol	TAG Ester	54450	DMS-MS	100010598			4.0367	1.5949	0.9159	2.2337	2.1795	0.8225	0.3372	2.0793	1.1749	3.9724	0.5836	0.7722	0.546	2.6398	1.4456	5.8152	1.8188	1.5794	5.043	1.5569	2.6602	1.3915	1.1231	3.2747	1.2133	1.679	4.3151	2.371	2.0812	0.7387	1.1581	3.2228	0.9405	1.5404	1.9013	2.5774	1.4704	4.1722	2.6018	1.3246	1.7764
9511	TAG56:7-FA22:6	Triacylglycerol	TAG Ester	54619	DMS-MS	100010767			17.1644	4.9854	2.1398	6.0694	4.8345	2.6142	0.9086	3.7183	2.0542	11.9615	1.3087	0.7869	1.5576	5.4149	4.7734	25.1199	8.3438	3.3517	11.7697	1.7714	6.5933	2.3504	2.0697	7.6057	2.5506	4.0181	8.1862	3.0747	7.0633	2.9283	3.3681	8.7256	3.5304	5.8366	2.6974	5.6738	4.1264	12.6341	5.2342	2.0161	2.9509
9515	TAG56:8-FA16:0	Triacylglycerol	TAG Ester	53923	DMS-MS	100010071			2.3047	0.4874	0.2775	0.7585	1.0531	0.3539	0.1177	0.6491	0.4902	1.2937	0.2583	0.147	0.2085	0.9421	0.6339	3.6942	1.1887	0.5741	2.0245	0.3683	1.2789	0.3893	0.3451	1.1442	0.4858	0.4963	1.2879	0.5398	0.8919	0.3416	0.4289	1.3035	0.5341	1.0312	0.4731	0.9641	0.4185	1.8019	0.8247	0.3312	0.4515
9516	TAG56:8-FA16:1	Triacylglycerol	TAG Ester	54085	DMS-MS	100010233			0.4162	0.1749	0.0928	0.2332	0.1839	0.12	0.0411	0.2452	0.1044	0.3497	0.0561	0.0665	0.0704	0.2618	0.1758	0.4936	0.3921	0.1543	0.4299	0.1632	0.3621	0.0793	0.1013	0.2864	0.0979	0.1207	0.3042	0.109	0.2918	0.1116	0.1541	0.2949	0.111	0.1675	0.2198	0.2193	0.1952	0.3913	0.2566	0.1099	0.1454
9518	TAG56:8-FA18:1	Triacylglycerol	TAG Ester	54280	DMS-MS	100010428			1.1013	0.6759	0.2464	0.4186	0.5002	0.2135	0.1383	0.6733	0.5221	0.5955	0.2678	0.1191	0.1981	0.5479	0.4879	1.1887	0.8698	0.5938	1.009	0.5414	1.0502	0.1772	0.1219	0.4938	0.2646	0.21	0.6326	0.455	0.5989	0.2323	0.2079	0.504	0.3148	0.3224	0.5423	1.3774	0.5683	1.1467	0.5846	0.3495	0.4127
9519	TAG56:8-FA18:2	Triacylglycerol	TAG Ester	53411	DMS-MS	100009559			2.3358	0.8034	0.4769	1.0959	1.6202	0.51	0.2402	1.5916	1.3119	1.5533	0.432	0.2958	0.3811	1.4143	0.9298	3.9091	1.7176	0.7381	2.6599	1.118	2.2562	0.7526	0.3918	1.4438	0.7719	0.5782	1.7312	0.9017	1.1509	0.4677	0.5316	1.4754	0.7859	1.2759	1.1398	2.1042	0.7219	2.4504	1.4503	0.6347	0.6764
9520	TAG56:8-FA18:3	Triacylglycerol	TAG Ester	53924	DMS-MS	100010072			0.5384	0.3854	0.1599	0.3405	0.2306	0.1089	0.0835	0.4514	0.4524	0.3407	0.2466	0.1047	0.1246	0.3639	0.2206	0.9911	0.3363	0.2706	0.6437	0.3981	0.2731	0.1127	0.1041	0.2959	0.2154	0.1237	0.5806	0.1944	0.175	0.1551	0.1028	0.349	0.307	0.2095	0.5421	0.4944	0.3019	0.791	0.3028	0.2454	0.2274
9524	TAG56:8-FA20:4	Triacylglycerol	TAG Ester	54451	DMS-MS	100010599			1.6375	1.4591	0.837	1.3222	1.7885	0.5425	0.4228	2.316	2.575	1.8774	1.1505	0.3904	0.5115	1.3736	0.8883	3.3905	0.8839	1.0963	2.3395	1.8287	1.2721	1.2173	0.2969	1.3372	1.0032	0.4285	1.9111	1.3731	0.7567	0.5446	0.4232	1.3483	1.6373	1.1034	2.3401	3.1435	1.1506	2.6116	1.6994	1.0764	1.0668
9525	TAG56:8-FA20:5	Triacylglycerol	TAG Ester	53751	DMS-MS	100009899			1.5504	0.7638	0.391	0.5438	1.2159	0.3584	0.2299	1.6993	1.067	0.8037	0.3869	0.2027	0.3764	1.176	0.9669	2.5471	2.3225	0.7444	2.1577	1.3101	3.8295	0.3347	0.1301	0.3915	0.3757	0.2821	1.015	0.5757	1.2731	0.3997	0.2104	0.7068	0.4758	0.6625	1.126	2.6245	0.9553	2.6511	1.0195	0.5056	0.4929
9527	TAG56:8-FA22:5	Triacylglycerol	TAG Ester	54620	DMS-MS	100010768			0.6356	0.2652	0.1289	0.3427	0.3067	0.1386	0.055	0.379	0.1989	0.5797	0.0945	0.1435	0.0913	0.4814	0.2445	0.9674	0.3937	0.2482	0.7471	0.2648	0.4471	0.1539	0.1777	0.4746	0.1832	0.2022	0.6577	0.242	0.3013	0.1363	0.1885	0.5172	0.1495	0.2356	0.4029	0.3839	0.2181	0.7016	0.3721	0.2003	0.2571
9528	TAG56:8-FA22:6	Triacylglycerol	TAG Ester	53412	DMS-MS	100009560			11.0782	2.0982	1.2032	3.6022	5.0149	1.7905	0.5181	3.203	1.7807	6.779	0.7597	0.6197	1.032	4.5692	3.2076	17.6999	6.4243	1.8626	8.6698	1.3534	7.0488	1.7742	1.5592	5.5156	1.9485	2.3538	5.5125	2.0675	5.0574	1.8041	2.2339	6.1725	2.116	5.2504	1.9089	3.7866	2.1418	8.0986	4.0432	1.2442	1.7639
9536	TAG56:9-FA18:3	Triacylglycerol	TAG Ester	54621	DMS-MS	100010769			0.4004	0.1906	0.089	0.1926	0.1868	0.0717	0.0489	0.2939	0.3083	0.2407	0.1532	0.0552	0.0823	0.2626	0.1398	0.798	0.3371	0.1523	0.4111	0.2149	0.2142	0.0697	0.051	0.1624	0.1295	0.0671	0.2972	0.088	0.131	0.1013	0.0604	0.2305	0.2185	0.1729	0.3204	0.2988	0.1784	0.5161	0.1589	0.1166	0.1141
9539	TAG56:9-FA20:4	Triacylglycerol	TAG Ester	54622	DMS-MS	100010770			0.4561	0.3235	0.1934	0.2956	0.3967	0.1168	0.0982	0.5822	0.7156	0.5058	0.3822	0.0872	0.1265	0.4153	0.2134	1.0883	0.2766	0.3057	0.5388	0.4409	0.2912	0.1645	0.0512	0.2485	0.2242	0.0622	0.4945	0.176	0.172	0.13	0.0666	0.3442	0.4615	0.2441	0.8293	0.5359	0.3561	0.8808	0.2631	0.2371	0.2466
9540	TAG56:9-FA20:5	Triacylglycerol	TAG Ester	53925	DMS-MS	100010073			0.6358	0.2637	0.1485	0.2147	0.6553	0.1472	0.0831	0.716	0.6228	0.3657	0.2059	0.0877	0.1563	0.5977	0.3698	1.3435	1.0928	0.2888	1.0316	0.6295	1.9343	0.1456	0.0496	0.1627	0.1813	0.0958	0.4875	0.3668	0.462	0.1503	0.0787	0.3269	0.2414	0.3179	0.5857	1.4586	0.4374	1.3627	0.3721	0.1887	0.1789
9543	TAG56:9-FA22:6	Triacylglycerol	TAG Ester	54452	DMS-MS	100010600			1.5027	0.3319	0.1757	0.533	0.6095	0.2933	0.0734	0.5852	0.2947	0.956	0.115	0.116	0.1496	0.8139	0.4739	2.5826	1.3924	0.2883	1.243	0.2693	1.1947	0.1816	0.2507	0.7882	0.2922	0.2655	0.8271	0.2051	0.778	0.2898	0.3455	0.9053	0.2971	0.7069	0.4257	0.5632	0.3354	1.2539	0.541	0.1896	0.2642
9571	TAG57:2-FA18:1	Triacylglycerol	TAG Ester	54086	DMS-MS	100010234			0.656	0.3999	0.2047	0.3142	0.4137	0.1997	0.1041	0.4821	0.242	0.5711	0.1396	0.0908	0.1777	0.4137	0.4635	0.7531	0.9196	0.3218	0.6809	0.2894	0.673	0.2012	0.1049	0.356	0.1959	0.2322	0.3428	0.2717	0.5488	0.2355	0.2067	0.3223	0.2864	0.3374	0.2951	0.8553	0.3062	0.6767	0.4786	0.1886	0.2349
9581	TAG57:3-FA18:2	Triacylglycerol	TAG Ester	53586	DMS-MS	100009734			0.2867	0.1242	0.0875	0.1436	0.3434	0.1094	0.0507	0.2787	0.2037	0.2654	0.0825	0.0555	0.0971	0.2829	0.2017	0.4535	0.4504	0.1311	0.3868	0.1816	0.528	0.1291	0.0569	0.1962	0.1345	0.1038	0.2005	0.1402	0.2699	0.1077	0.1063	0.1896	0.1699	0.2468	0.1714	0.4231	0.1168	0.3602	0.2421	0.0946	0.1127
9650	TAG57:8-FA22:6	Triacylglycerol	TAG Ester	54454	DMS-MS	100010602			0.2924	0.1822	0.1351	0.1928	0.2274	0.1433	0.1118	0.1761	0.1736	0.2846	0.1135	0.0936	0.1269	0.2295	0.1764	0.4991	0.2639	0.1435	0.3361	0.1226	0.2559	0.1105	0.1049	0.2029	0.1481	0.1375	0.236	0.1369	0.2685	0.124	0.1558	0.1861	0.1313	0.1827	0.1315	0.2394	0.173	0.3443	0.1852	0.1238	0.1488
9659	TAG57:9-FA22:6	Triacylglycerol	TAG Ester	53413	DMS-MS	100009561			2.6705	2.6803	2.7418	2.7015	2.6785	2.6031	2.645	2.5729	2.4691	2.5972	2.672	2.514	2.681	2.6427	2.6566	2.7699	2.6697	2.7477	2.7469	2.5762	2.7039	2.3677	2.4576	2.5737	2.5935	2.6009	2.4259	2.5935	2.5962	2.6019	2.6246	2.5472	2.5098	2.5641	2.9089	2.6767	2.6117	2.6845	2.5995	2.6124	2.5695
9677	TAG58:10-FA18:2	Triacylglycerol	TAG Ester	54281	DMS-MS	100010429			0.2742	0.1148	0.0912	0.1312	0.3344	0.1084	0.0521	0.2915	0.194	0.2492	0.0891	0.0537	0.092	0.2808	0.2024	0.4544	0.4329	0.134	0.3817	0.1794	0.5231	0.1281	0.0555	0.1944	0.1271	0.1011	0.1904	0.1378	0.2505	0.1052	0.0999	0.1816	0.1649	0.2412	0.168	0.3987	0.1158	0.3425	0.2316	0.0903	0.1061
9681	TAG58:10-FA20:4	Triacylglycerol	TAG Ester	53414	DMS-MS	100009562			0.5492	0.3461	0.279	0.3609	0.7054	0.1655	0.1383	0.7472	0.7188	0.7528	0.4362	0.0664	0.1668	0.4743	0.2387	1.3364	0.1952	0.3194	0.6638	0.3532	0.3984	0.303	0.0335	0.2784	0.1751	0.0514	0.3446	0.21	0.2532	0.1325	0.0801	0.4127	0.7869	0.3501	0.8723	0.6318	0.3684	0.989	0.281	0.2113	0.2869
9682	TAG58:10-FA20:5	Triacylglycerol	TAG Ester	54087	DMS-MS	100010235			0.2157	0.1139	0.0781	0.0934	0.2119	0.0554	0.0427	0.301	0.199	0.1881	0.1245	0.0222	0.063	0.2174	0.0941	0.5422	0.1935	0.1223	0.3887	0.1538	0.401	0.0465	0.0102	0.0484	0.037	0.0202	0.1413	0.0513	0.1655	0.0429	0.0223	0.1338	0.1487	0.1019	0.2554	0.2048	0.1989	0.5625	0.0862	0.0644	0.0787
9684	TAG58:10-FA22:5	Triacylglycerol	TAG Ester	53752	DMS-MS	100009900			0.139	0.0831	0.0568	0.169	0.1451	0.0529	0.0647	0.1321	0.1097	0.1588	0.0405	0.0984	0.1209	0.1681	0.1081	0.2201	0.1583	0.1238	0.2186	0.0847	0.1257	0.0478	0.0251	0.1111	0.0565	0.0654	0.1464	0.1181	0.1214	0.1041	0.0539	0.1617	0.0627	0.0866	0.1033	0.1494	0.0851	0.202	0.1306	0.0955	0.07
9685	TAG58:10-FA22:6	Triacylglycerol	TAG Ester	53587	DMS-MS	100009735			1.0088	0.3506	0.1936	0.4361	0.8559	0.35	0.1018	0.7398	0.3945	0.9815	0.1355	0.1105	0.2521	0.8876	0.6638	2.0046	2.0312	0.2709	1.263	0.3244	1.6338	0.3283	0.1612	0.5901	0.304	0.2792	0.5814	0.2654	0.9243	0.3863	0.3142	0.6478	0.3523	0.7346	0.4057	0.7845	0.3437	1.1476	0.655	0.1827	0.2076
9716	TAG58:2-FA18:1	Triacylglycerol	TAG Ester	53753	DMS-MS	100009901			0.411	0.2543	0.0751	0.1296	1.391	0.0222	0.0395	0.0668	0.082	0.1227	0.0746	0.0225	0.048	0.0604	0.7477	0.1363	0.1657	0.2877	0.2152	0.2462	0.0688	0.0221	0.0374	0.3902	0.1186	0.0909	0.0866	0.1601	0.0678	0.0473	0.0462	0.0943	0.3565	0.0432	0.0334	2.6221	0.0936	0.1523	0.4605	0.0755	0.0972
9727	TAG58:3-FA18:1	Triacylglycerol	TAG Ester	54282	DMS-MS	100010430			0.2668	0.1629	0.0803	0.105	0.8524	0.0309	0.0317	0.0858	0.084	0.1212	0.048	0.0352	0.0458	0.0884	0.6629	0.1535	0.397	0.2101	0.147	0.1993	0.0773	0.0296	0.0352	0.2615	0.0944	0.1357	0.0962	0.1472	0.0881	0.0457	0.0576	0.0787	0.2183	0.0554	0.0429	1.5063	0.0972	0.2153	0.3339	0.074	0.1187
9752	TAG58:5-FA18:1	Triacylglycerol	TAG Ester	53588	DMS-MS	100009736			0.1857	0.1926	0.1041	0.1702	0.0947	0.0496	0.0376	0.1323	0.078	0.2231	0.0579	0.0642	0.0538	0.1335	0.1428	0.1608	0.106	0.2127	0.2024	0.1365	0.0819	0.067	0.046	0.4499	0.0793	0.098	0.2087	0.1866	0.1085	0.0555	0.0875	0.1664	0.0931	0.0623	0.1188	0.1929	0.1886	0.157	0.1929	0.112	0.1663
9766	TAG58:6-FA16:0	Triacylglycerol	TAG Ester	53589	DMS-MS	100009737			0.1618	0.1261	0.0755	0.1527	0.1203	0.0397	0.0271	0.0635	0.0347	0.2842	0.0294	0.0528	0.0366	0.1357	0.0705	0.1561	0.0531	0.2835	0.2116	0.0763	0.0801	0.0277	0.0421	0.6596	0.0704	0.061	0.1814	0.0979	0.0903	0.0334	0.0758	0.1866	0.0791	0.0706	0.0682	0.0841	0.1019	0.207	0.19	0.0882	0.1338
9768	TAG58:6-FA18:0	Triacylglycerol	TAG Ester	54455	DMS-MS	100010603			0.3357	0.1787	0.0986	0.2024	0.1518	0.0573	0.0327	0.1695	0.1058	0.2368	0.0716	0.0436	0.0719	0.2106	0.1399	0.3186	0.1459	0.2556	0.3647	0.1221	0.1744	0.0944	0.0683	0.2165	0.0871	0.0855	0.3327	0.2166	0.1704	0.0613	0.0903	0.232	0.0988	0.1104	0.1351	0.2521	0.1552	0.3206	0.2305	0.1009	0.1516
9769	TAG58:6-FA18:1	Triacylglycerol	TAG Ester	53754	DMS-MS	100009902			0.5509	0.6592	0.3071	0.5155	0.2887	0.166	0.1138	0.4274	0.2107	0.6718	0.1456	0.1611	0.1492	0.3958	0.3832	0.5714	0.2919	0.5102	0.7091	0.3684	0.3188	0.2269	0.1485	0.967	0.2213	0.258	0.6714	0.5427	0.3647	0.1683	0.2474	0.4886	0.232	0.2036	0.3786	0.5701	0.4461	0.5687	0.5821	0.3274	0.4669
9776	TAG58:6-FA20:4	Triacylglycerol	TAG Ester	54283	DMS-MS	100010431			0.1313	0.1294	0.0896	0.1442	0.1235	0.0442	0.0353	0.1359	0.0879	0.1573	0.0563	0.0399	0.0479	0.1204	0.111	0.1331	0.0692	0.1067	0.1666	0.1102	0.0529	0.0554	0.03	0.1936	0.0583	0.0529	0.1293	0.1241	0.0906	0.0443	0.0563	0.1063	0.1227	0.0532	0.0979	0.1796	0.1182	0.1312	0.164	0.0641	0.0944
9779	TAG58:6-FA22:4	Triacylglycerol	TAG Ester	53415	DMS-MS	100009563			0.306	0.3782	0.1843	0.277	0.1658	0.1063	0.0771	0.2667	0.135	0.3577	0.1041	0.0886	0.1004	0.223	0.2355	0.3311	0.1448	0.2866	0.3643	0.2057	0.1645	0.1659	0.0818	0.4325	0.1353	0.1716	0.3666	0.3702	0.2092	0.108	0.1484	0.2764	0.1444	0.1134	0.2474	0.3431	0.2547	0.2922	0.3106	0.1941	0.2932
9780	TAG58:6-FA22:5	Triacylglycerol	TAG Ester	53590	DMS-MS	100009738			0.4515	0.3587	0.1736	0.3142	0.2087	0.096	0.0602	0.2706	0.1408	0.5875	0.088	0.0819	0.1057	0.3336	0.262	0.443	0.2538	0.3452	0.5566	0.1639	0.2586	0.1674	0.1017	0.3438	0.1246	0.2027	0.4726	0.3452	0.2979	0.1068	0.1576	0.3378	0.134	0.1481	0.2357	0.4171	0.3012	0.4204	0.3185	0.1608	0.276
9784	TAG58:7-FA16:0	Triacylglycerol	TAG Ester	53591	DMS-MS	100009739			0.255	0.1627	0.0908	0.1715	0.1515	0.0413	0.0251	0.0938	0.0473	0.3897	0.0529	0.0519	0.0538	0.1756	0.0905	0.2686	0.0592	0.6431	0.2415	0.0797	0.1144	0.0426	0.0339	0.5045	0.081	0.0545	0.2068	0.0872	0.082	0.0398	0.0677	0.2117	0.0981	0.0798	0.0993	0.1149	0.2013	0.4226	0.2039	0.1065	0.1272
9786	TAG58:7-FA18:0	Triacylglycerol	TAG Ester	53416	DMS-MS	100009564			0.4744	0.1798	0.0913	0.2217	0.1939	0.0759	0.0346	0.1958	0.1275	0.2889	0.0642	0.0447	0.0762	0.2641	0.1962	0.4693	0.2945	0.2001	0.4878	0.1087	0.263	0.1027	0.0737	0.2146	0.0955	0.1089	0.3406	0.2032	0.2443	0.0879	0.1079	0.2668	0.1122	0.1574	0.1306	0.3051	0.1711	0.3685	0.2429	0.0938	0.1333
9787	TAG58:7-FA18:1	Triacylglycerol	TAG Ester	54284	DMS-MS	100010432			0.9973	0.9571	0.3988	0.7226	0.4382	0.2875	0.1674	0.727	0.3263	1.1195	0.1805	0.2227	0.2607	0.6528	0.7381	1.0754	0.8902	0.8068	1.2046	0.5434	0.7321	0.3741	0.2047	0.7963	0.2924	0.4611	0.8106	0.6709	0.749	0.3127	0.3541	0.6261	0.319	0.3482	0.6304	1.0173	0.7498	1.166	0.8282	0.4132	0.5608
9788	TAG58:7-FA18:2	Triacylglycerol	TAG Ester	53926	DMS-MS	100010074			0.3074	0.2178	0.1292	0.2691	0.2571	0.108	0.0602	0.2796	0.1616	0.3045	0.0821	0.1077	0.0898	0.3043	0.2175	0.3611	0.198	0.242	0.4823	0.2325	0.2997	0.1535	0.1012	0.5407	0.1547	0.1373	0.3735	0.2982	0.2194	0.0947	0.1479	0.2671	0.1362	0.167	0.2321	0.3354	0.167	0.3378	0.3613	0.1638	0.2234
9794	TAG58:7-FA20:4	Triacylglycerol	TAG Ester	54456	DMS-MS	100010604			0.1955	0.1647	0.1153	0.2095	0.182	0.0661	0.0432	0.241	0.1387	0.2478	0.0792	0.0562	0.0601	0.1885	0.1289	0.2752	0.0658	0.15	0.273	0.1651	0.086	0.0983	0.0336	0.2568	0.0815	0.0655	0.2305	0.1614	0.1035	0.0541	0.0704	0.2009	0.1905	0.0922	0.1966	0.2261	0.1647	0.2091	0.2263	0.1077	0.1364
9797	TAG58:7-FA22:4	Triacylglycerol	TAG Ester	54623	DMS-MS	100010771			0.2117	0.1966	0.1124	0.1929	0.1488	0.0851	0.0464	0.242	0.1378	0.252	0.0734	0.0826	0.0686	0.1876	0.1823	0.2641	0.1165	0.1912	0.2805	0.1892	0.1675	0.1442	0.0594	0.3405	0.1214	0.123	0.2495	0.2749	0.1477	0.0826	0.1079	0.1918	0.105	0.0991	0.2051	0.2844	0.1269	0.2306	0.2628	0.1495	0.1806
9798	TAG58:7-FA22:5	Triacylglycerol	TAG Ester	53417	DMS-MS	100009565			1.0379	1.1375	0.5289	0.8947	0.5849	0.3762	0.1957	0.9072	0.3603	1.858	0.1913	0.3539	0.3153	0.9428	0.9141	1.049	0.9219	0.6777	1.3528	0.5489	0.8165	0.5872	0.2738	0.9432	0.3284	0.853	1.0015	0.8698	0.9483	0.4397	0.5193	0.7779	0.3254	0.3918	0.7421	1.2669	0.9037	1.0524	0.9859	0.4694	0.6766
9799	TAG58:7-FA22:6	Triacylglycerol	TAG Ester	53418	DMS-MS	100009566			1.654	0.6415	0.2648	0.5983	0.5413	0.2547	0.1105	0.4461	0.259	1.1183	0.1482	0.0823	0.2316	0.669	0.7366	1.6731	1.3092	0.479	1.4267	0.2198	0.8044	0.2359	0.1493	0.7034	0.2849	0.3579	0.6954	0.4521	0.8743	0.3331	0.3395	0.7075	0.3446	0.5471	0.3041	0.9021	0.5548	1.1184	0.6882	0.2092	0.3255
9805	TAG58:8-FA18:1	Triacylglycerol	TAG Ester	54457	DMS-MS	100010605			1.2686	0.9228	0.3891	0.657	0.5868	0.3746	0.1831	0.8306	0.3582	1.2617	0.194	0.1973	0.3095	0.7244	1.0121	1.4215	1.7206	0.5805	1.3299	0.5285	1.1231	0.3864	0.2041	0.6902	0.3188	0.528	0.6932	0.527	1.1487	0.4719	0.4405	0.6033	0.3808	0.521	0.5432	1.2842	0.7205	1.2651	0.9342	0.3401	0.432
9806	TAG58:8-FA18:2	Triacylglycerol	TAG Ester	53755	DMS-MS	100009903			0.4825	0.2987	0.1937	0.3654	0.3786	0.173	0.0956	0.4471	0.2485	0.5356	0.1048	0.1461	0.1581	0.4804	0.3698	0.6511	0.5314	0.4226	0.7322	0.3337	0.622	0.2382	0.1242	0.4471	0.2208	0.224	0.4619	0.3416	0.4322	0.1824	0.2062	0.3638	0.2015	0.2831	0.3532	0.5338	0.2894	0.6397	0.4859	0.2168	0.2422
9811	TAG58:8-FA20:3	Triacylglycerol	TAG Ester	54088	DMS-MS	100010236			0.1454	0.1827	0.1106	0.1645	0.1249	0.0546	0.0469	0.2728	0.1861	0.2384	0.0979	0.0489	0.0744	0.1553	0.1072	0.2471	0.0437	0.1529	0.2199	0.1833	0.0858	0.0662	0.0137	0.1542	0.061	0.0349	0.1939	0.1016	0.0774	0.0537	0.04	0.1661	0.1956	0.0788	0.2427	0.2173	0.2487	0.2526	0.1419	0.1185	0.1121
9812	TAG58:8-FA20:4	Triacylglycerol	TAG Ester	54458	DMS-MS	100010606			0.3785	0.3487	0.2211	0.3714	0.3447	0.119	0.0982	0.5085	0.3733	0.5154	0.2598	0.0701	0.1095	0.3526	0.2006	0.6773	0.0996	0.2966	0.536	0.2975	0.1508	0.2375	0.048	0.3286	0.1348	0.0824	0.4137	0.2996	0.1925	0.0943	0.0887	0.3742	0.4145	0.1798	0.5407	0.4531	0.3728	0.5032	0.3256	0.216	0.2512
9816	TAG58:8-FA22:5	Triacylglycerol	TAG Ester	53756	DMS-MS	100009904			0.7184	0.6354	0.3413	0.6303	0.5834	0.2963	0.1352	0.8485	0.3454	1.3323	0.1349	0.3326	0.2581	0.826	0.7448	0.8675	0.8216	0.4279	1.0869	0.528	0.8942	0.5323	0.2232	0.7973	0.3148	0.5948	0.7161	0.6824	0.7327	0.3235	0.3851	0.5785	0.2686	0.369	0.6535	1.0679	0.5104	0.8481	0.8567	0.3613	0.4704
9817	TAG58:8-FA22:6	Triacylglycerol	TAG Ester	53419	DMS-MS	100009567			3.8003	2.1078	0.8639	1.602	1.5519	1.04	0.3958	1.7206	0.6598	3.3133	0.2985	0.3134	0.7587	1.9201	2.5867	4.0747	5.3255	0.9656	3.2872	0.8041	2.9947	0.8239	0.4783	1.7682	0.7289	1.3184	1.574	0.9907	3.2667	1.3512	1.1844	1.6817	0.909	1.5942	0.9069	3.0481	1.6698	3.1022	2.1807	0.5965	0.8567
9823	TAG58:9-FA18:1	Triacylglycerol	TAG Ester	54089	DMS-MS	100010237			0.6358	0.3841	0.1896	0.319	0.3974	0.2024	0.1029	0.4575	0.2441	0.5489	0.1412	0.0867	0.159	0.4103	0.4537	0.7444	0.8978	0.3284	0.6708	0.2892	0.6808	0.2059	0.1041	0.3562	0.1929	0.2335	0.3327	0.2495	0.5435	0.2295	0.213	0.3192	0.2758	0.3225	0.2948	0.8198	0.3027	0.6511	0.4408	0.1842	0.2384
9824	TAG58:9-FA18:2	Triacylglycerol	TAG Ester	54624	DMS-MS	100010772			0.5241	0.2551	0.1609	0.288	0.4144	0.1957	0.0774	0.4745	0.2466	0.5336	0.096	0.1069	0.1564	0.448	0.4346	0.7072	0.8664	0.2342	0.7023	0.2803	0.8213	0.2289	0.0993	0.3779	0.1948	0.2225	0.3477	0.2577	0.5496	0.2077	0.209	0.3029	0.1963	0.3455	0.264	0.5845	0.234	0.6009	0.4658	0.158	0.1826
9829	TAG58:9-FA20:4	Triacylglycerol	TAG Ester	53927	DMS-MS	100010075			0.6257	0.6692	0.4396	0.5652	0.6979	0.2074	0.2111	0.9622	0.8071	0.9681	0.6422	0.0978	0.2097	0.5402	0.3075	1.4074	0.1641	0.5093	0.8327	0.4839	0.298	0.3849	0.0522	0.4062	0.2127	0.0837	0.5623	0.3667	0.2885	0.1541	0.1153	0.5292	1.0646	0.351	1.1467	0.8624	0.5893	1.2687	0.4165	0.3719	0.4842
9832	TAG58:9-FA22:5	Triacylglycerol	TAG Ester	53420	DMS-MS	100009568			0.3284	0.238	0.1281	0.2864	0.3416	0.1272	0.0727	0.3909	0.2186	0.5402	0.0868	0.15	0.1449	0.4258	0.2708	0.5509	0.3912	0.2214	0.5448	0.2492	0.4364	0.2239	0.0903	0.3316	0.1655	0.1831	0.3723	0.2626	0.2921	0.1589	0.1442	0.3288	0.1353	0.1943	0.3302	0.4562	0.1929	0.4774	0.3483	0.1716	0.1887
9833	TAG58:9-FA22:6	Triacylglycerol	TAG Ester	54459	DMS-MS	100010607			2.3691	1.0167	0.5295	1.0661	1.5824	0.8344	0.2675	1.6829	0.6619	2.2843	0.2183	0.2701	0.5992	1.663	1.8549	3.2328	4.2849	0.5855	2.5582	0.7485	3.3254	0.7512	0.3753	1.4185	0.6373	0.8752	1.1663	0.6997	2.4605	0.9563	0.8318	1.2904	0.7128	1.5164	0.754	2.2045	0.8803	2.3666	1.7797	0.419	0.5486
9929	TAG60:10-FA22:5	Triacylglycerol	TAG Ester	53757	DMS-MS	100009905			0.1333	0.1119	0.0742	0.1366	0.1326	0.0527	0.0501	0.1383	0.0891	0.2349	0.05	0.0569	0.0867	0.1666	0.1023	0.2119	0.0843	0.1094	0.2187	0.0682	0.1018	0.0799	0.022	0.1034	0.0462	0.059	0.1361	0.0926	0.1096	0.0724	0.0398	0.1573	0.0711	0.0738	0.1304	0.1348	0.111	0.2022	0.1226	0.0757	0.0793
9930	TAG60:10-FA22:6	Triacylglycerol	TAG Ester	53758	DMS-MS	100009906			0.2672	0.1105	0.0733	0.1557	0.1833	0.0885	0.0316	0.1709	0.0929	0.3052	0.0419	0.0267	0.0653	0.2494	0.1567	0.4131	0.2212	0.0902	0.3126	0.0701	0.1797	0.0866	0.0297	0.1799	0.0605	0.0717	0.1691	0.0869	0.1999	0.0872	0.0672	0.1982	0.1129	0.1424	0.1205	0.1617	0.1322	0.2562	0.1676	0.0473	0.0633
9943	TAG60:11-FA22:5	Triacylglycerol	TAG Ester	54090	DMS-MS	100010238			0.1297	0.0727	0.0449	0.1071	0.1225	0.045	0.0324	0.1024	0.0755	0.2205	0.0305	0.0377	0.0559	0.1553	0.0727	0.2282	0.0961	0.0668	0.1936	0.0471	0.1035	0.0569	0.0158	0.0854	0.0342	0.0377	0.1024	0.0589	0.1003	0.0511	0.0319	0.129	0.0592	0.0657	0.0964	0.1034	0.0701	0.1806	0.0781	0.0478	0.0492
9944	TAG60:11-FA22:6	Triacylglycerol	TAG Ester	53421	DMS-MS	100009569			0.3973	0.1639	0.0967	0.1916	0.2733	0.1287	0.0537	0.2394	0.1455	0.4769	0.0667	0.034	0.0982	0.3474	0.2055	0.8031	0.3451	0.1054	0.4761	0.09	0.3294	0.1089	0.0412	0.1816	0.0782	0.0816	0.2104	0.0809	0.308	0.1127	0.084	0.2517	0.1746	0.2211	0.1791	0.1911	0.1767	0.5001	0.1926	0.0643	0.0869
9956	TAG60:12-FA22:6	Triacylglycerol	TAG Ester	54285	DMS-MS	100010433			0.4596	0.1056	0.0602	0.1574	0.292	0.1138	0.0359	0.1718	0.1288	0.4385	0.044	0.0209	0.0824	0.3683	0.1853	0.8985	0.4491	0.0721	0.4861	0.0654	0.3711	0.0851	0.0307	0.1769	0.0658	0.0591	0.1468	0.0518	0.351	0.0938	0.0669	0.2455	0.1482	0.2843	0.1327	0.1608	0.1296	0.457	0.1438	0.0431	0.0578
6532	Total CE	Neutral Complex Lipids SUM	Cholesteryl Esters	54657	DMS-MS	100010820			2452.29	1836.16	1678.45	1949.22	1367.19	1393.88	1372.16	1484.18	1682.77	1632.99	1625.35	989.024	1397.13	1211.13	1227.05	2215.54	1444.68	1630.66	2354.93	1409.91	1433.94	826.821	807.827	1664.17	1404.38	1450.27	2619.17	2087.16	1509.43	1486.87	1394.29	2062.54	1575.86	1475.21	1357.77	1852.36	1989.77	2450.1	1878.65	1742.59	2024.14
6525	Total CER	Sphingolipid SUM	Ceramides	54667	DMS-MS	100010830			6.0347	4.3021	3.574	4.7665	3.7395	3.3786	4.4344	4.1633	4.6524	2.6122	4.1421	3.6969	2.922	2.5395	3.0974	5.6678	2.684	4.4703	7.1832	3.7794	3.0413	1.9519	1.7689	2.548	3.634	4.8124	6.7095	5.8296	3.2107	3.8202	3.9097	3.9346	4.4429	4.7089	2.9731	5.5175	4.9494	5.6752	4.6603	3.8754	5.6929
6533	Total DAG	Neutral Complex Lipids SUM	Diacylglycerols	54659	DMS-MS	100010822			46.3367	21.0015	10.4503	20.9209	11.9102	6.7034	6.8798	14.9941	11.6628	22.2237	10.4582	6.2292	5.0473	8.6048	10.7017	48.3331	10.6139	35.0834	28.7992	15.057	10.9078	8.179	8.122	42.5717	15.0074	19.7292	40.9161	23.5195	12.8206	8.6912	9.4084	31.3878	11.3828	13.22	9.6948	30.9684	18.602	32.045	29.045	16.0336	22.4709
6526	Total DCER	Sphingolipid SUM	Dihydroceramides	54670	DMS-MS	100010833			2.3616	1.6482	1.4785	1.7305	1.4653	1.4735	1.4809	1.9708	1.8675	1.6408	1.5642	1.4227	1.3686	1.1566	1.3812	2.0068	1.2609	1.6765	2.2072	1.4077	1.4476	1.0209	1.1113	1.6616	1.9019	1.5229	2.4393	2.2647	1.399	1.4341	1.4829	1.833	1.3826	1.8385	0.9914	1.7807	1.8833	2.0493	1.8088	1.6511	2.2776
6531	Total FFA	Neutral Complex Lipids SUM	Free Fatty Acids	54660	DMS-MS	100010823			671.912	639.395	585.686	733.482	654.766	623.822	661.618	822.202	677.214	721.804	484.601	983.646	592.205	558.231	566.642	713.067	700.337	788.411	502.161	550.829	574.367	691.532	750.735	767.245	592.837	683.433	661.854	721.471	577.889	609.262	602.998	794.008	753.636	684.389	583.458	691.013	479.795	514.66	636.563	602.535	555.044
6527	Total HCER	Sphingolipid SUM	Hexosylceramides	54668	DMS-MS	100010831			4.241	2.5322	4.2848	5.5764	2.29	2.9063	4.0651	3.0464	4.4837	2.6103	3.7971	3.4486	3.9961	3.0791	2.9347	3.3414	3.6237	3.1801	4.7451	3.9624	2.1589	1.7366	2.2944	2.5571	3.5502	2.7809	4.3399	4.1222	3.8344	4.5695	3.5193	3.213	3.065	2.999	2.2209	2.8225	4.0878	3.7343	5.5097	3.7178	4.0254
6528	Total LCER	Sphingolipid SUM	Lactosylceramides	54669	DMS-MS	100010832			2.9821	2.9967	3.344	4.3642	2.3488	3.33	3.4054	2.3722	3.5296	2.4666	3.4031	2.7738	3.6126	2.0757	2.4705	2.2072	2.9761	2.9476	3.0773	2.5361	1.8674	2.5218	1.9804	2.1462	2.991	2.6307	2.8274	4.039	3.8017	4.901	3.0429	2.8997	3.0603	2.9777	1.7674	2.6436	3.3883	2.5763	3.0101	3.8957	3.4858
6521	Total LPC	Phospholipid SUM	Lysophosphatidylcholines	54664	DMS-MS	100010827			202.306	179.967	168.276	184.874	110.122	181.964	192.726	145.872	166.249	99.3422	127.317	85.3464	262.709	127.194	204.385	154.019	149.881	155.622	171.516	174.456	131.386	58.8875	74.7369	139.127	148.615	191.618	163.646	198.649	127.341	189.612	150.605	117.447	133.42	143.557	128.958	191.577	192.006	267.986	178.672	161.154	159.541
6523	Total LPE	Phospholipid SUM	Lysophosphatidylethanolamines	54665	DMS-MS	100010828			6.39	5.8186	5.5424	5.8394	4.277	4.5112	6.3799	4.5568	7.0707	4.4385	6.0737	2.6988	9.1188	3.9615	7.7395	5.2847	4.3479	8.7627	5.6771	6.5042	3.7255	1.6472	2.1909	7.0735	6.0154	5.9063	5.9	8.0411	5.9316	5.5313	3.7107	3.6272	5.4749	4.4419	5.426	9.6895	8.445	8.2236	9.2081	4.5698	5.2925
6536	Total MAG	Neutral Complex Lipids SUM	Monoacylglycerols	62056	DMS-MS	100020183			9.4495	8.0212	7.1869	8.1066	7.0231	7.6164	7.9646	22.2994	8.5175	22.7121	7.3804	6.4856	7.3959	6.1642	8.6076	8.9862	7.3121	9.6469	9.4986	9.1147	7.9911	8.0729	9.2495	30.2181	29.385	8.3842	9.5024	11.1476	6.4685	6.6911	8.717	7.1692	6.3528	6.4347	15.545	9.4221	9.1064	7.2506	18.0575	8.1559	8.595
6520	Total PC	Phospholipid SUM	Phosphatidylcholines	54661	DMS-MS	100010824			2368.67	1638.89	1716.45	1925	1336.68	1665.92	1455.01	1635.91	2035.41	2015.57	1781.35	1424.46	2115.39	1373.16	1829.38	1965.63	1438.65	1994.13	2513.45	1533.95	1178.78	780.017	638.45	2373.21	1476.83	1639.73	2409.54	2211.1	1626.3	1780.01	1485.07	1886.19	1672.04	1620.36	1150.9	2259.02	2102.99	2316.5	1927.83	1639.9	1816.1
6522	Total PE	Phospholipid SUM	Phosphatidylethanolamines	54662	DMS-MS	100010825			174.073	148.61	134.083	152.012	95.3169	140.239	93.5323	170.727	207.404	224.35	142.669	61.8817	165.655	78.1625	160.054	180.795	125.068	157.883	209.861	112.479	106.333	71.4584	30.3572	181.443	148.833	112.824	171.618	202.297	120.695	77.0022	101.981	105.353	104.207	142.97	82.1848	234.167	209.788	145.907	138.435	97.244	175.582
6524	Total PI	Phospholipid SUM	Phosphatidylinositols	54663	DMS-MS	100010826			40.575	27.8358	28.4095	26.4876	16.4406	18.0055	24.2079	23.4531	28.0268	33.787	25.5265	17.7114	28.4126	19.0838	27.8742	26.0314	25.0704	30.4234	42.6745	20.3465	20.1124	12.3379	7.4497	48.3698	22.1839	30.3624	34.0958	33.6184	24.7464	30.7733	15.9378	25.6254	23.6208	28.8782	21.7717	31.6204	39.1831	44.9456	37.4709	29.2928	32.9474
6529	Total SM	Sphingolipid SUM	Sphingomyelins	54666	DMS-MS	100010829			484.92	333.816	393.98	495.502	322.363	327.555	348.536	359.48	403.824	347.34	355.204	298.62	427.769	279.477	307.013	403.907	335.15	355.077	558.332	321.168	305.395	223.572	173.08	337.321	344.846	328.21	493.158	565.347	378.963	411.947	334.61	380.174	372.163	408.732	220.541	424.488	443.239	423.371	467.86	401.777	448.496
6535	Total TAG	Neutral Complex Lipids SUM	Triacylglycerols	54658	DMS-MS	100010821			1771.8	980.476	418.639	738.044	586.909	236.815	253.198	551.912	532.965	853.09	455.747	237.031	180.003	414.472	519.48	1680.9	503.58	1545.63	1241.76	636.226	496.997	299.356	390.188	1548.78	598.649	710.068	1557.69	843.243	548.41	281.804	449.398	1210.42	501.512	547.005	474.095	1573.21	672.07	1282.69	1347.08	682.83	940.131
[truncated: 12 more columns]
