# Supplementary material for: A Proposed Explainable Artificial Intelligence-Based Machine Learning Model for Discriminative Metabolites for Myalgic Encephalomyelitis/Chronic Fatigue Syndrome
Source: Preprints.org preprint supplement (doi:10.20944/preprints202307.1585.v1), 2023-07-25
Supplement: Supplementary file 2 [file Supplementary File 1.xlsx]

## Sheet: OrigScale HD4
PATHWAY_SORTORDER	BIOCHEMICAL	SUPER_PATHWAY	SUB_PATHWAY	COMP_ID	PLATFORM	CHEMICAL_ID	RI	MASS	CAS	PUBCHEM	CHEMSPIDER	KEGG	Group HMDB_ID	C1	C2	C3	C4	C5	C6	C7	C8	C9	C10	C11	C12	C13	C14	C15	C16	C17	C18	C19	C20	C21	C22	C23	C24	C25	C26	P1	P2	P3	P4	P5	P6	P7	P8	P9	P10
452	(N(1) + N(8))-acetylspermidine	Amino Acid	Polyamine Metabolism	57814	LC/MS Pos Early	100016038	3080	188.176						672039	599392	1023576	804353	557954	1609237	927166	1088624	707863	799685	943069	886869	1081265	769652	804398	954249	882974	851072	795408	1638999	1187545	1205401	850373	649257	668638	924595	1141529	1146568	1382168	1625984	1564514	1276612	833859	933224	474314	714202
310	1-carboxyethylisoleucine	Amino Acid	Leucine, Isoleucine and Valine Metabolism	62558	LC/MS Neg	100020427	2628	202.108						74472	23403	33924	15061	40816	15061	15061	26107	82198	30903	65028	15061	15061	15061	25612	26005	15061	25724	26690	15061	15061	15061	15061	16803	38344	15061	115460	56103	15061	20590	16629	15061	15061	15061	15061	33494
273	1-carboxyethylleucine	Amino Acid	Leucine, Isoleucine and Valine Metabolism	62559	LC/MS Neg	100020425	2663	202.108						54758	22374	57498	21318	58013	23417	21318	34094	53840	24596	62160	21318	47262	21640	21318	47031	21318	37885	37086	21318	21318	21318	21318	21318	45696	21318	101484	72109	21318	30507	34993	21318	21318	42678	21318	45330
128	1-carboxyethylphenylalanine	Amino Acid	Phenylalanine Metabolism	62566	LC/MS Neg	100020419	2844	236.093			19276386			230130	112937	256586	62260	193937	53626	67179	105097	152781	153281	206225	47368	141936	58669	91207	107954	111500	141110	164572	122485	61002	178025	28964	91111	206052	102811	283070	285137	134257	149117	95626	62563	64561	131889	104710	150650
333	1-carboxyethylvaline	Amino Acid	Leucine, Isoleucine and Valine Metabolism	62562	LC/MS Neg	100020423	2008	188.093						128065	66968	92744	29284	100637	44635	23037	93367	132301	75821	110719	27322	82848	41488	63143	91690	41442	93376	87593	61597	47254	70793	23037	47658	89556	42055	185999	121675	58595	46180	49682	50463	58915	64719	41125	89245
84	1-methyl-4-imidazoleacetate	Amino Acid	Histidine Metabolism	32350	LC/MS Pos Early	100001208	2064	141.066	2625-49-2	75810	68319	C05828	HMDB02820	1595220	911738	1242042	1594599	994207	740709	859693	1305644	1480793	973940	954757	648461	1291228	1127710	1578412	1741180	981497	1467621	1157238	1110631	1718252	772192	924018	1286270	1504195	1072363	1443489	1096792	1367000	1051322	1527374	980065	1216380	1100310	1411150	1075812
85	1-methyl-5-imidazoleacetate	Amino Acid	Histidine Metabolism	62946	LC/MS Pos Early	100002910	1989	141.066	4200-48-0	6451814	4954265		HMDB04988	1563524	1761776	1495843	1359280	3893889	2741084	3271915	25530392	3771950	8247266	5693535	148494	4320473	7480377	8125072	6437572	3422580	944865	2025768	306232	8038109	2156761	193210	582378	3076594	232338	7380264	566906	10705281	259616	1563183	4520123	956176	4404448	304654	385867
67	1-methylhistidine	Amino Acid	Histidine Metabolism	30460	LC/MS Neg	100001051	1227	168.078	332-80-9	92105	83153	C01152	HMDB00001	306946	170567	180168	219187	307190	400620	223990	531111	486358	337443	236926	190944	380725	246654	414395	424892	320787	268990	185260	128021	383370	156299	110101	244440	153954	165225	464769	487972	333324	207736	285499	252552	262459	309787	97803	192007
86	1-ribosyl-imidazoleacetate*	Amino Acid	Histidine Metabolism	61868	LC/MS Pos Early	100001668	2006	259.092	29605-99-0	5117448	4292299	C05131	HMDB02331	2139132	1680606	1757116	1655573	1845230	968380	1456673	1921994	1773652	2450994	1427290	1179061	1402865	1085822	2143277	1868889	1362079	2333119	1479622	1927545	2145181	562820	1228730	2411103	1297713	1900635	1981396	1340876	1553134	1497166	1870003	2073728	1593319	1242925	2023356	1757341
341	2,3-dihydroxy-2-methylbutyrate	Amino Acid	Leucine, Isoleucine and Valine Metabolism	57547	LC/MS Neg	100010869	787	133.051	14868-24-7	301941	266858		HMDB29576	191212	245996	208971	129250	116337	196459	268500	247497	283372	40151	56756	182952	403364	146600	127157	40151	40151	241966	123723	426548	40151	40151	40151	250105	40151	152855	40151	206799	299569	78272	126656	40151	123090	40151	134461	125394
358	2,3-dihydroxy-5-methylthio-4-pentenoate (DMTPA)*	Amino Acid	Methionine, Cysteine, SAM and Taurine Metabolism	62805	LC/MS Neg	100020893	1156	177.023						627763	477533	606227	373324	505236	398632	472191	607209	609963	525576	403603	492312	557750	414458	642749	546794	402732	546835	478139	494652	563317	359319	276225	409509	387593	495628	818996	687584	510766	425141	386462	522781	515324	584134	425850	520749
110	2-aminoadipate	Amino Acid	Lysine Metabolism	6146	LC/MS Polar	381	3500	160.062	542-32-5;1118-90-7	469	456	C00956	HMDB00510	535403	85710	85710	217267	527924	100462	85710	136811	226218	322766	524036	244850	132691	170983	85710	292895	85710	85710	85710	219670	312113	309079	155947	164459	216053	85710	719580	805456	389022	133120	141932	298543	200533	280673	109338	416784
469	2-aminobutyrate	Amino Acid	Glutathione Metabolism	42374	LC/MS Pos Early	1128	2059	104.071	1492-24-6	439691	388757	C02261	HMDB00650	54751368	33468206	60858688	47044024	65812884	65819392	30348434	58314992	54431144	47566204	60300840	85509624	74251096	84279712	36715744	62539500	56094028	50173752	46312468	41833448	83583888	61391528	49197944	33770752	74814312	29082854	63887664	57485412	54942788	55194444	61855948	47915096	47071236	58782464	34862376	63272516
336	2-hydroxy-3-methylvalerate	Amino Acid	Leucine, Isoleucine and Valine Metabolism	36746	LC/MS Neg	100001541	1800	131.071	488-15-3	164623	144317		HMDB00317	548358	1166488	540972	260975	478791	566235	385214	432628	822935	460809	650192	1339702	1273654	820640	861071	363785	358891	769124	493344	557226	402825	581075	308756	863127	779950	394277	774871	730926	669624	1221941	362012	553198	338107	715000	421980	586486
471	2-hydroxybutyrate/2-hydroxyisobutyrate	Amino Acid	Glutathione Metabolism	52281	LC/MS Polar	100008928	1258	103.04						285639040	146417536	194691488	162781792	310171136	194725056	77890520	356089984	110890728	232853376	158280528	426212192	211061808	291791520	119418320	369903104	116275248	467102272	159490528	127936672	221803520	259179488	135115888	253880160	162031168	137936448	330770720	134999056	188253616	195464368	218943408	180491680	200671008	191838048	237397536	269971744
137	2-hydroxyphenylacetate	Amino Acid	Phenylalanine Metabolism	1432	LC/MS Polar	235	858.6	151.04	614-75-5	11970	11476	C05852	HMDB00669	2755844	1258102	2262886	1241675	1466795	2291000	1536737	2471989	1640006	3373983	1392470	953253	1778314	1223132	4977932	1211727	903441	1413203	1448494	3459903	2558533	1697788	1185526	1775062	1531709	1634339	2456045	7031739	1347660	1403890	1218847	1402085	1672498	1751359	2367798	2854743
279	2-ketocaprylate	Amino Acid	Leucine, Isoleucine and Valine Metabolism	63120	LC/MS Neg	100020833	3951	157.087	328-51-8	67600	60921		HMDB13211	870111	788276	1003233	672191	2626937	785332	1072969	1527644	2129926	678177	604146	950636	3030784	499468	2099095	1293432	830038	822498	952125	1792429	1134278	471167	426054	640172	566889	2043764	856918	2064490	1283356	1598044	900464	614801	1296953	861941	451023	1154200
314	2-methylbutyrylcarnitine (C5)	Amino Acid	Leucine, Isoleucine and Valine Metabolism	45095	LC/MS Pos Early	100001509	3050	246.17	31023-25-3	6426901	4932320		HMDB00378	1503799	906758	1050746	909247	205676	819393	1053474	1512698	1366013	1082058	940166	791956	1330238	971777	1017260	1035139	660832	634319	538704	490990	1083601	1027059	770094	506794	834768	476381	1615140	1629558	1080898	927283	764075	727484	652959	1057558	205676	1237879
316	2-methylbutyrylglycine	Amino Acid	Leucine, Isoleucine and Valine Metabolism	31928	LC/MS Pos Early	100001155	2000	160.097	52320-67-9	193872	168243		HMDB00339	120940	100859	204149	79479	52879	126024	52879	83414	52879	52879	52879	212821	52879	52879	120678	232708	102471	89477	236855	212426	52879	256526	52879	161568	52879	52879	862925	339137	244155	52879	52879	90364	213125	52879	176656	217382
15	2-methylserine	Amino Acid	Glycine, Serine and Threonine Metabolism	53229	LC/MS Pos Early	100009246	1652	120.066		94309	85112	C02115		2953914	3320384	6249385	3930993	3235738	3149519	2340701	4112802	2421062	3560180	3017144	5678374	5753464	2770935	7799957	7616688	4446490	1574866	3082564	3337167	3434244	1010696	3790692	2790035	3839138	4415875	9151842	2031657	2871215	5557927	3077734	5785614	5502597	3072917	919250	3083415
394	2-oxoarginine*	Amino Acid	Urea cycle; Arginine and Proline Metabolism	55072	LC/MS Pos Early	100002784	1760	174.087	3715-10-04	558	542	C03771	HMDB04225	3010897	1119322	4356317	1547323	4069114	1676030	1434204	5177020	4332970	3659790	3202379	1440005	2505923	1718603	2107936	1717332	2021116	830695	1412812	1375659	3951365	894633	506856	3326367	2720181	720935	3393157	3180468	1124861	2846498	4182775	1400834	2087516	2997135	1138243	3348582
58	2-pyrrolidinone	Amino Acid	Glutamate Metabolism	31675	LC/MS Pos Early	100001081	1262	86.06	616-45-5	12025	11530		HMDB02039	1208317	1029364	949424	985751	1354023	1495988	1205531	1078267	887728	1264942	811326	949728	1383961	1431412	1110524	1106323	1125206	3309233	963624	1374490	2029175	543336	602075	870317	1076130	1461660	1365292	1330086	2003629	1160127	762237	939463	1191781	1047831	705391	1284116
157	3-(4-hydroxyphenyl)lactate	Amino Acid	Tyrosine Metabolism	32197	LC/MS Neg	240	1379	181.051	6482-98-0	9378	9010	C03672	HMDB00755	4279974	2267486	3080814	2308530	2600373	1999232	2255475	2397856	3688295	1803117	3177788	3489726	4842274	4620266	3083973	2852461	1766546	3782315	2804621	2991330	2304593	2006752	1400202	1523509	2229353	3029114	3361012	3017728	2416569	2614457	2316745	1652889	1923818	3653576	2308095	2664280
392	3-amino-2-piperidone	Amino Acid	Urea cycle; Arginine and Proline Metabolism	62853	LC/MS Pos Early	100020361	2065	115.087	1892-22-4	5200225	4371576		HMDB00323	814547	719644	1040113	964847	954397	860631	1073295	1114424	796428	663864	830986	667614	1017111	1147292	726080	828709	785756	948756	696015	841183	1687362	672903	740674	379412	678987	710720	829981	726646	861332	706758	825969	814201	942223	1002726	437637	1271431
320	3-hydroxy-2-ethylpropionate	Amino Acid	Leucine, Isoleucine and Valine Metabolism	32397	LC/MS Neg	100001170	975	117.056	4374-62-3	188979	164207		HMDB00396	1926012	873213	1674738	855946	966960	1330026	606477	2586573	2368002	1462764	857045	1446939	1497784	1276499	1041182	1079838	1276293	1141262	1096625	1198966	1003528	920081	754625	1474397	1351141	889768	1963393	1232998	1780795	1387032	2431256	1257085	718642	1228740	524006	1496010
340	3-hydroxyisobutyrate	Amino Acid	Leucine, Isoleucine and Valine Metabolism	1549	LC/MS Polar	111	1619	103.04	2068-83-9	87	10140307	C06001	HMDB00336	30493998	17285936	19827926	15931716	33470760	33357424	17078246	56269816	71104016	51512600	27852524	33416928	37383020	26266132	27645278	37908536	25827684	29045408	22576682	38623120	24722586	36657716	10229805	24191904	29143616	31273218	39792704	41873188	34479400	25688938	29160440	19308344	22283940	32959528	25921178	42342992
264	3-indoxyl sulfate	Amino Acid	Tryptophan Metabolism	27672	LC/MS Neg	100000467	2222.2	212.002	2642-37-7	10258	9840		HMDB00682	36763856	63376436	18226512	29092566	27807124	14822543	32048312	28506072	37603072	21698716	37092136	23148528	7267560	39145416	54222396	40670416	29403064	32459730	17889704	43229900	36125328	12888510	12713645	6505522	42679732	3347455	44939088	44555108	35950380	34051304	41270572	20167612	22521564	40915772	15566793	51392256
175	3-methoxytyrosine	Amino Acid	Tyrosine Metabolism	12017	LC/MS Pos Early	1342	2555	212.092	300-48-1	1670	8948		HMDB01434	332646	307186	248148	280616	219450	146847	215620	208598	251959	221225	153831	274273	221545	177919	159952	213244	355799	344863	195820	350943	110578	207815	376913	108498	242394	307433	223471	270606	275346	315808	272694	238678	316907	207752	171880	267111
335	3-methyl-2-oxobutyrate	Amino Acid	Leucine, Isoleucine and Valine Metabolism	44526	LC/MS Neg	100000936	1465	115.04	3715-29-5	49	48	C00141	HMDB00019	12642648	9451047	10099120	9775743	17133252	10984698	10141620	15136416	16608446	15706048	12671943	19072570	16370908	16503207	14187030	17209624	10251553	14543703	11076674	10845574	11098984	11748906	7206161	13659171	11420818	11149491	13147369	15763380	14402108	16441672	14813833	14972202	11265947	14540379	9288112	14795902
311	3-methyl-2-oxovalerate	Amino Acid	Leucine, Isoleucine and Valine Metabolism	15676	LC/MS Neg	100000036	2064.2	129.056	1460-34-0;51829-07-3	47	46	C00671	HMDB03736	27013692	24127972	29225428	20819168	51013392	30886808	32661404	34577688	41723740	42881760	45451240	56355364	54135884	42243840	39647056	40186204	24240416	32096540	31724212	40296656	29479546	32359404	21026692	34335476	40495940	36614736	40450564	44166208	28970236	50434560	36934088	42162448	29678668	34086856	24652502	44247024
294	3-methylglutaconate	Amino Acid	Leucine, Isoleucine and Valine Metabolism	57747	LC/MS Polar	100002458	2700	99.0452	5746-90-7	1551553	1267861		HMDB00522	3093105	2678292	1929171	3423617	4500861	3204789	3001931	6158140	6044554	27429736	2209324	9303163	3082464	4431053	4509627	3707558	3176772	8526361	2423880	5673990	3026513	1727209	2476611	2523923	2780751	5788762	4271341	5324451	2597395	2817747	2743484	1839776	5658755	2243423	1908497	4780802
298	3-methylglutarylcarnitine (2)	Amino Acid	Leucine, Isoleucine and Valine Metabolism	46548	LC/MS Pos Early	100005850	2687	290.16		128145	113619		HMDB00552	694919	484021	315279	840075	2114389	273153	656104	1203902	746769	4406848	550702	882789	265068	810503	577778	911019	514261	814862	1001691	246539	422502	217475	389364	334434	357332	1044174	821199	289625	510387	140221	689856	356267	1613557	619260	162506	896301
68	3-methylhistidine	Amino Acid	Histidine Metabolism	15677	LC/MS Neg	100000042	906.3	168.078	368-16-1	64969	58494	C01152	HMDB00479	982702	749088	1254642	801002	3734326	2583642	2971980	14876935	6332878	6126427	5985162	82806	5368605	7912378	8934208	5134417	3962221	290159	852616	222000	12012212	2038275	95128	446008	1860924	130638	5773848	474197	13161435	89559	1035458	967630	543166	6591314	105750	321224
384	3-sulfo-L-alanine	Amino Acid	Methionine, Cysteine, SAM and Taurine Metabolism	47089	LC/MS Polar	382	2890	167.997	498-40-8	72886	65718	C00506	HMDB02757	102602	164924	70794	189750	70794	103080	138140	70794	70794	140352	119736	70794	146136	207269	151971	141182	118664	137322	251728	192805	269706	70794	84034	70794	70794	128246	136228	242454	70794	91856	164361	70794	175224	70794	70794	140038
450	4-acetamidobutanoate	Amino Acid	Polyamine Metabolism	1558	LC/MS Pos Early	1113	1350	146.081	3025-96-5	18189	17180	C02946	HMDB03681	3322895	1894403	2496270	1940131	2053086	2387685	2613235	2537867	2616538	3055806	1816648	2056012	2936924	2958876	2802386	2277606	1952799	4030257	2392230	2730152	4055643	1031564	1275933	2242940	1802930	2804404	4140426	3147547	2607184	2580876	2031016	2680015	2426378	3238201	2112991	3531547
455	4-guanidinobutanoate	Amino Acid	Guanidino and Acetamido Metabolism	15681	LC/MS Pos Early	100000096	2320	146.092	463-003;463-00-3	500	486	C01035	HMDB03464	1036799	1801378	1300302	509174	1322482	514421	756049	1104424	659675	724601	748627	1025038	903838	529766	771719	560831	1316186	12660823	634696	1338713	1153790	603131	294806	753063	579087	635633	615052	1001325	448353	713206	1308451	399367	4021532	695589	400248	966003
48	4-hydroxyglutamate	Amino Acid	Glutamate Metabolism	40499	LC/MS Pos Early	100002544	1141	164.055	2485-33-8	439902	388936	C03079	HMDB01344	70121	20368	20368	20368	314475	20368	20368	46541	167243	123187	20368	68276	56434	50310	57824	20368	20368	20368	69302	20368	74713	40743	20937	155273	72323	20368	109231	36387	47431	71703	116444	156929	58009	205826	47303	20368
140	4-hydroxyphenylacetate	Amino Acid	Phenylalanine Metabolism	541	LC/MS Neg	144	1361	151.04	156-38-7	127	3881560	C00642	HMDB00020	236655	183651	82604	122526	172488	65381	375628	123632	127678	298511	112077	141931	65381	280491	310047	251677	293988	943269	137155	161253	182234	65381	65381	65381	65381	65381	422462	244369	120580	141436	150967	65381	193382	241856	65381	294625
154	4-hydroxyphenylpyruvate	Amino Acid	Tyrosine Metabolism	1669	LC/MS Neg	1141	1690	179.035	156-39-8	979	954	C01179	HMDB00707	122349	59218	157665	59218	133299	225284	59218	134318	191390	87949	189701	73900	167155	73171	59218	59218	59218	96240	98006	101394	59218	178200	59218	59218	129334	59218	59218	120906	73618	66512	59218	59218	70687	101049	81733	69651
87	4-imidazoleacetate	Amino Acid	Histidine Metabolism	32349	LC/MS Pos Early	100001207	2055	127.05	645-65-8	96215	86856	C02835	HMDB02024	178972	230468	426799	67904	107795	131037	108660	234180	216691	266250	190463	105881	320285	176328	183065	214761	67904	626590	161301	220863	192801	105943	84211	144343	67904	155544	274329	184316	148730	186339	218261	227971	316319	111166	145357	178069
164	4-methoxyphenol sulfate	Amino Acid	Tyrosine Metabolism	48457	LC/MS Neg	100006262	2412	203.002	3233-60-1					58171	24480	27669	81237	127608	24480	60185	25529	32660	24480	53877	24480	61398	53878	44156	36915	440813	24480	26242	343325	24480	24480	24480	24480	24480	124285	24480	303017	49887	24480	38889	28868	185873	24922	24480	32767
275	4-methyl-2-oxopentanoate	Amino Acid	Leucine, Isoleucine and Valine Metabolism	22116	LC/MS Neg	100000551	2170	129.056	816-66-0	70	69	C00233	HMDB00695	37242072	39258216	36380260	31472182	75701328	59052720	44491100	52716536	71847608	67725824	67938288	91774096	82348664	66855528	52139160	72611832	34077800	57726032	45604396	48957500	50676952	47808664	30262722	44265032	59384884	67584152	61107076	70875840	37716816	88783296	55376116	58790460	48146236	45044448	31445760	72460184
108	5-(galactosylhydroxy)-L-lysine	Amino Acid	Lysine Metabolism	43582	LC/MS Pos Early	100002462	2755	325.161	32448-36-5					98042	107593	104745	136445	96353	49585	87957	140190	49585	49585	81878	49585	51558	49585	78878	167161	83910	133574	113895	92917	126097	50285	67350	49585	49585	128964	164144	49585	100142	49585	122508	229042	118088	90646	64033	108999
262	5-hydroxyindole sulfate	Amino Acid	Tryptophan Metabolism	52914	LC/MS Neg	100009042	1928	212.002						45824	76536	26350	78506	47226	26350	26350	26350	39174	52557	38590	26350	26350	26350	55115	64107	26350	52590	28797	43451	26350	26350	26350	26350	34371	26350	26350	55376	26350	26350	35705	26350	30247	26350	26350	46506
107	5-hydroxylysine	Amino Acid	Lysine Metabolism	15685	LC/MS Pos Early	100000054	2790	163.108	13204-98-3	1029	1002	C16741	HMDB00450	198032	282960	220580	465046	204740	145267	239311	288385	358882	356843	245200	197746	354704	305299	109494	259951	447693	236248	292588	197894	487059	156631	135139	182748	175268	230778	200843	185847	261712	271557	234831	341016	197030	172786	102863	242809
445	5-methylthioadenosine (MTA)	Amino Acid	Polyamine Metabolism	1419	LC/MS Pos Early	212	2752	298.097	2457-80-9	439176	388321	C00170	HMDB01173	437856	256465	401926	432435	504038	338401	348082	401264	596873	703673	404660	400148	483151	499400	496708	608346	2176868	656504	485287	497519	669563	150258	262014	475390	579527	504439	847450	606745	472923	474350	486442	823105	362763	500093	415825	505929
357	5-methylthioribose**	Amino Acid	Methionine, Cysteine, SAM and Taurine Metabolism	62100	LC/MS Pos Early	100002103	790	181.053	23656-67-9	494	480		HMDB01087	590234	611032	452648	650119	421585	161376	477486	474144	330156	667148	499967	234796	539252	432747	566775	591038	503934	596818	358930	369019	837305	389965	533812	438296	295016	771758	743152	514554	709577	392647	664794	508963	539947	557870	264462	592482
468	5-oxoproline	Amino Acid	Glutathione Metabolism	1494	LC/MS Neg	1021	738.5	128.035	98-79-3	7405	7127	C01879	HMDB00267	27140080	30490822	32476116	27558970	28395548	29520682	29176220	19235258	18857464	19455408	18802258	21461220	29227582	27991236	29546822	25991466	29081360	25048444	17955010	31529158	24224158	33131732	18227764	13630673	16805120	31441406	21873556	19700536	22329920	30219800	28767336	16412511	24259306	26226400	11280186	19603368
268	6-bromotryptophan	Amino Acid	Tryptophan Metabolism	62503	LC/MS Neg	100020414	3565	280.993						458773	187187	587880	358238	332993	242310	369784	360912	378472	329151	286608	357521	363600	375565	318182	337894	243701	379785	333016	381546	261172	193528	361722	388265	350848	350894	339063	372266	218231	509520	316721	365472	264806	300460	159525	294518
119	6-oxopiperidine-2-carboxylate	Amino Acid	Lysine Metabolism	43231	LC/MS Neg	100004499	965	142.051	34622-39-4	3014237	2282737		HMDB61705	123865	66568	66568	128104	226104	144039	66568	138785	194264	160309	133077	66568	158643	169792	78272	151421	212621	137278	107984	66568	66568	213726	66568	96974	66568	66568	336473	206836	226086	66568	122606	118895	112935	66568	66568	154755
239	8-methoxykynurenate	Amino Acid	Tryptophan Metabolism	62955	LC/MS Pos Early	100020360	2574	220.06	2929-14-8	76230	68710	C05830	HMDB60426	73889	26006	26006	31000	26006	47147	61051	248865	60129	193191	114802	121941	129188	122362	101847	102166	26006	26006	26006	26006	93267	26006	26006	64027	26006	33243	135017	114992	26006	26006	26006	27817	50513	121054	166226	78984
441	acisoga	Amino Acid	Polyamine Metabolism	43258	LC/MS Neg	100004541	2297	183.114	106692-36-8	129397	114601			45530	17778	27563	31903	29963	144166	17778	133788	17778	17778	53951	51867	41607	57507	78524	44980	46202	62114	17778	46789	25939	44232	17778	63275	17778	96219	118522	59809	69920	131226	63519	56805	73769	34328	31888	17778
28	alanine	Amino Acid	Alanine and Aspartate Metabolism	1126	LC/MS Pos Early	811	1700	90.055	56-41-7	5950	5735	C00041	HMDB00161	622568448	557502016	729929088	419492576	567838720	373646272	470106464	479030048	663541696	484650304	676127552	452029664	675721088	620232064	395281440	643373504	509958048	432876768	583777664	621420352	564553344	383675232	435969984	416099968	609182016	455941888	572294080	528783648	488150112	477150720	656331904	515512960	503109536	547704448	370137344	558753344
278	alpha-hydroxyisocaproate	Amino Acid	Leucine, Isoleucine and Valine Metabolism	22132	LC/MS Neg	100000706	1840	131.071	10303-64-7	83697	75520	C03264	HMDB00746	489704	727232	504474	387639	549685	751925	435664	393306	851904	438367	497742	1023694	808565	706190	707151	645005	250668	512563	575365	465168	624392	613476	285246	400695	629275	700514	587813	555060	534983	998844	525781	506320	477216	580672	310965	563406
312	alpha-hydroxyisovalerate	Amino Acid	Leucine, Isoleucine and Valine Metabolism	46537	LC/MS Polar	100001300	1052	117.056	600-37-3	99823	90190		HMDB00407	96662560	93630360	96127288	47667452	115750512	148086416	52518376	85965704	152416672	76564448	71219432	299603648	307794816	177841760	207271600	100547008	63416288	252962080	74943624	115986992	84694864	117604712	49715380	169250112	73607376	58228684	95866560	131719760	124510304	195677968	91439752	110888952	91173520	115221896	118683040	84372136
363	alpha-ketobutyrate	Amino Acid	Methionine, Cysteine, SAM and Taurine Metabolism	4968	LC/MS Polar	796	940	101.024	600-18-0	58	2829426	C00109	HMDB00005	4736287	956810	1268570	2178579	6212853	1357872	1515121	6867626	3768188	7026783	4626966	6050841	4053146	5138781	1294563	4966109	2122837	8387484	4391675	3076930	956810	4920013	3747355	6985878	5705711	2143065	6431109	5959740	4664422	5086524	4249432	5579084	3739557	3595307	5358209	7722764
44	alpha-ketoglutaramate*	Amino Acid	Glutamate Metabolism	62101	LC/MS Polar	100002397	1916	144.03	18465-19-5					12011222	12178180	16398533	11611918	10146845	9636553	11252501	13000643	18942892	12491778	12105666	13077943	19382776	14728273	16464807	16554900	18495188	15496070	14949217	17471636	13718443	8080463	6777388	13782773	13651083	25052340	16723433	11841531	12317191	18429364	13625985	10107050	9540088	12554761	8979043	14267418
421	argininate*	Amino Acid	Urea cycle; Arginine and Proline Metabolism	57461	LC/MS Pos Early	100002769	2150	176.103	157-07-3	160437	140984		HMDB03148	895668	420842	648931	672662	1578540	868911	506093	2686363	1119161	576302	690687	541802	585653	490779	586984	1025109	917418	301085	185924	522153	1705972	95516	206067	645043	343855	224451	928550	527003	226425	285351	654440	561841	941583	1124964	209157	586804
386	arginine	Amino Acid	Urea cycle; Arginine and Proline Metabolism	1638	LC/MS Pos Early	231	2825	175.119	1119-34-2	232	227	C00062	HMDB00517	157754736	155979440	167388240	159145360	181148960	198954304	146780384	131370064	214038576	130029664	209786448	151564032	236640976	211573264	141274864	85817824	166355056	133857440	223727280	164933408	186706560	105653960	160821072	104193344	285052800	115281504	197449312	208357776	166039888	93431216	158902528	195362192	195301920	171555456	114259936	183588256
39	asparagine	Amino Acid	Alanine and Aspartate Metabolism	512	LC/MS Pos Early	917	1225	133.061	70-47-3	6267	6031	C00152	HMDB00168	81154352	88359736	110778864	97049328	116053168	102277184	113726744	87281080	139015888	104631048	103954520	108030352	155299376	118218528	115340136	97854896	110906008	81209856	116100208	134126960	96469208	91528120	89667216	108794696	144580816	87345992	108134504	99308952	91186888	103667336	115679496	93491872	95220960	97231944	81817488	107669432
35	aspartate	Amino Acid	Alanine and Aspartate Metabolism	443	LC/MS Pos Early	234	1165	134.045	56-84-8	5960	5745	C00049	HMDB00191	9006570	4574971	8181243	6063189	8414203	12346153	5733976	7068270	4410097	6326549	6325046	5132502	8129220	4185953	5915983	11298004	4090587	4555600	5212561	7329893	22129680	8667110	3904085	5074007	3896849	6074175	8089949	5008297	4748205	5470157	12495374	7242868	4645335	7567715	4251577	5107074
54	beta-citrylglutamate	Amino Acid	Glutamate Metabolism	54923	LC/MS Neg	100003271	530	320.062	73590-26-8	72715786	19992713	C20775		106253	98455	55439	87750	107027	69387	104006	69662	108049	56547	74981	60531	84256	56571	68880	154956	122923	110418	63641	60506	187415	87593	64410	58674	54974	123909	90587	105323	56193	71484	156453	49233	49234	127539	34027	45329
291	beta-hydroxyisovalerate	Amino Acid	Leucine, Isoleucine and Valine Metabolism	12129	LC/MS Neg	1442	1027	117.056	625-08-1	69362	62571		HMDB00754	2790227	2254977	1710930	1594035	2100789	2590923	1318097	3190321	4074973	3066646	1534283	2529832	2069919	2237653	2135080	2391829	1890319	2148152	1779398	1861799	2128131	3929950	1324582	2276275	2369678	2487504	3494447	2498912	1914199	2927318	2252629	2383507	1637010	2463608	1535134	2626978
6	betaine	Amino Acid	Glycine, Serine and Threonine Metabolism	3141	LC/MS Pos Early	799	1064	118.086	107-43-7	247	24219951173	C00719	HMDB00043	316262656	374953888	403538976	300519456	358946880	391108416	358889888	424077248	344113120	277560352	249300016	364151296	385016768	274021216	344112064	252804208	574562688	443728128	356657696	442436064	443046912	385980384	281162752	286908128	382309376	438348384	363594656	456628320	254455984	332899104	446130656	326200736	289455136	309736960	363939584	361573888
224	C-glycosyltryptophan	Amino Acid	Tryptophan Metabolism	48782	LC/MS Neg	100006379	1777	365.135	180509-18-6	10981970	9157171			217500	185770	207426	210191	206530	150307	209740	190016	199115	178778	158606	176753	171572	174531	154629	191022	143617	188935	175158	160802	197730	133941	141573	127973	114425	237945	241135	226633	197371	197876	207093	240860	231036	200178	125563	191011
56	carboxyethyl-GABA	Amino Acid	Glutamate Metabolism	40007	LC/MS Pos Early	100003260	2085	176.092	4386-03-02	2572	2474		HMDB02201	561805	315881	356625	395312	615439	407585	439722	477147	422018	510863	490938	480354	598165	578243	452639	568957	424293	543350	486171	506422	395705	449729	417026	343148	437091	498522	606324	567021	559628	422259	512064	424407	583413	475852	437427	540537
61	citramalate	Amino Acid	Glutamate Metabolism	22158	LC/MS Pos Early	100000998	1224	166.071	6236-10-08	1081	1051	C00815	HMDB00426	762836	419586	462038	718464	688859	512079	568029	1124523	852135	296515	248932	335662	1713296	716951	343089	598649	883841	690772	1008690	778386	211735	270805	469237	1389107	321352	366079	353359	333264	1831195	374428	852538	322600	295249	544131	357170	391666
395	citrulline	Amino Acid	Urea cycle; Arginine and Proline Metabolism	2132	LC/MS Pos Early	391	1520	176.103	372-75-8	9750	810	C00327	HMDB00904	83893136	73797128	69855720	105082376	90079656	112357848	112692224	144594768	73748944	81903952	97136656	102691792	132268008	142501872	108464512	113030424	95821368	92502464	94478848	87071024	135027168	56529888	77345968	84536216	99494512	118630208	109519984	91893544	90129176	73482600	91795136	92571256	124355744	97843200	99182248	117869000
427	creatine	Amino Acid	Creatine Metabolism	27718	LC/MS Pos Early	1221	1947	132.077	57-00-1	586	566	C00300	HMDB00064	532794496	483332800	552652352	545775680	545679616	550644096	282348768	618479872	427797728	522533504	625226560	219758464	435205600	686442624	391515520	639997312	408277472	356984768	354121280	260414064	424714656	487777408	280465664	286951072	407365248	211572416	568360512	621134080	380929280	248232192	267625248	249027856	522664096	453295392	393992768	484351936
428	creatinine	Amino Acid	Creatine Metabolism	513	LC/MS Pos Early	275	2055	114.066	60-27-5	588	568	C00791	HMDB00562	348476192	314122720	350038080	336222720	382491968	369049280	381166208	352039008	409481312	368779680	333348864	404581888	358409120	359214912	411208672	330829120	350219712	366203360	369025696	368695136	353363712	321336896	308245376	348984384	354653760	369654848	399576256	394083040	364721184	403184896	378371424	368361120	315803040	407284960	310961056	358525376
467	cys-gly, oxidized	Amino Acid	Glutathione Metabolism	18368	LC/MS Pos Early	1224	2947	355.074	7729-20-6	333293	295316			1954851	2221883	2073950	2281646	1563779	968206	1573667	1540067	828472	839546	869752	1537430	2583514	1648603	2178185	2524117	1602798	2006894	1670683	2547289	1612928	1901348	926871	1366116	441619	2630495	2264123	691142	917141	1692314	978231	1153349	1440184	2059243	823030	1926632
362	cystathionine	Amino Acid	Methionine, Cysteine, SAM and Taurine Metabolism	15705	LC/MS Pos Early	310	2270	223.075	535-34-2	439258	811	C02291	HMDB00099	197906	50572	120311	138562	149902	76871	153632	303143	328919	137797	197925	94730	231615	230156	40166	114526	245486	140648	84264	162197	154442	81647	63611	40166	133695	106601	423712	446226	129909	73546	41405	40166	82146	177528	223366	167901
364	cysteine	Amino Acid	Methionine, Cysteine, SAM and Taurine Metabolism	1868	LC/MS Pos Early	800	1475	122.027	52-90-4;56-89-3	5862	5653	C00097	HMDB00574	1742964	1911128	1856245	1568289	2545296	1778258	1639132	2616294	2202869	1930453	1388829	2237716	4185345	2259847	1539205	2069758	2295363	2204103	1992916	1988115	1582739	1518251	1513991	1841778	2283323	2226318	1469973	2381690	1640316	2326178	2141279	2023087	2336561	2119753	1453061	1809153
369	cysteine s-sulfate	Amino Acid	Methionine, Cysteine, SAM and Taurine Metabolism	22176	LC/MS Polar	100000808	2273	199.969	1637-71-4	115015	102939	C05824	HMDB00731	12904945	11287186	9059227	8971281	10015669	9087563	11590434	8218070	8339770	8819684	7531007	10576083	4901312	7989288	8792173	10179598	9661387	11818837	11255837	11071449	9656853	9594175	4717398	5741837	5183755	6984074	7506967	11660607	10910109	9798032	9909707	9898673	10652925	8197844	3835843	11842913
376	cysteine sulfinic acid	Amino Acid	Methionine, Cysteine, SAM and Taurine Metabolism	37443	LC/MS Pos Early	100002113	597	154.017	207121-48-0	109	107	C00606	HMDB00996	105237	84531	43175	109329	106027	41605	87824	74457	98204	73526	89644	54069	85959	131724	119521	80011	84214	105397	79482	79669	102914	40529	62597	72510	55548	62278	86973	165232	89681	77845	94255	73972	83873	52382	40529	103690
462	cysteine-glutathione disulfide	Amino Acid	Glutathione Metabolism	35159	LC/MS Pos Early	100001437	2465	427.095	13081-14-6	4247235	3455404		HMDB00656	1626004	2395202	2235170	1586131	1609196	2997469	2579131	1943568	1886201	1896920	1169169	2099633	1738170	1644729	3169371	2073321	2195280	1357187	635704	2926635	1880872	2992159	1694913	1102877	1451776	2059406	2387153	1200766	1884036	2557174	5054906	384110	1979539	1878256	483202	1664627
465	cysteinylglycine	Amino Acid	Glutathione Metabolism	35637	LC/MS Pos Early	278	2132	179.048	19246-18-5	439498	58762	C01419	HMDB00078	312430	288530	420513	237640	191662	199553	310345	359171	218823	249945	185032	324215	835016	453898	223208	511013	217695	487685	233311	433656	153964	365488	136939	254770	290513	468959	328208	239370	182490	279367	155299	184467	214504	274433	166101	346500
466	cysteinylglycine disulfide*	Amino Acid	Glutathione Metabolism	62103	LC/MS Pos Early	100002466	2547	298.053	70555-24-7		17215992		HMDB00709	23556852	19632596	19945302	23163532	25348560	12676003	20603196	20020176	12025048	14629941	14215008	21344742	19647092	23110040	21094870	23498654	16935568	26344408	25760922	25351624	24580504	16224918	12452774	15582546	9273765	20122022	25481476	13994233	13944741	21755424	17536960	21987484	22944420	26765762	9806489	19812756
370	cystine	Amino Acid	Methionine, Cysteine, SAM and Taurine Metabolism	56	LC/MS Pos Early	279	2000	241.031	56-89-3	67678	575	C00491	HMDB00192	57822528	44793308	44710784	54851960	72495368	33541026	58655056	52594312	40957028	53342360	53765504	54051480	33229828	67649448	45295680	53659792	39323316	67978816	69716448	52288444	72795480	34935012	36038860	35221600	48751520	35475992	62016484	60901192	48922460	49931208	57233928	74125560	66067180	68188824	31402546	47092732
401	dimethylarginine (SDMA + ADMA)	Amino Acid	Urea cycle; Arginine and Proline Metabolism	36808	LC/MS Pos Early	100001810	2850	203.15	102783-24-4	123831	110375	C03626	HMDB01539	13074120	11880274	14976315	14595930	13264196	12098180	16321680	13388819	15345655	13634325	11800560	14486401	19439882	17210890	14725429	15349958	12649985	15232967	14781850	15339101	12549831	10921231	10734471	10618933	14061695	13998066	15750544	14209047	13953531	13833036	17829800	16179622	14742845	12402382	8614798	14767238
5	dimethylglycine	Amino Acid	Glycine, Serine and Threonine Metabolism	5086	LC/MS Pos Early	806	1104	104.071	1118-68-9	673	653	C01026	HMDB00092	22541616	20201244	25390940	19037732	22529220	20230874	19377080	21865112	15912186	21747210	12845099	24047614	23025056	19355504	17587986	18089518	30744652	19875532	23565740	68309408	19806852	26769268	14260200	18320642	27846648	20669972	31010132	24465284	25890528	21723836	25909058	22804432	18103832	23971994	19123740	22613808
195	dopamine 3-O-sulfate	Amino Acid	Tyrosine Metabolism	48407	LC/MS Neg	100006361	1556.2	232.028		122136	108936	C13690	HMDB06275	154672	107273	2085323	40690	85986	77063	73040	123993	191076	154178	47588	88778	175922	76905	166884	63821	727678	113247	100118	135764	63937	62378	68107	79744	79365	63099	160583	179970	96633	809546	84066	46354	109152	85288	61185	103303
322	ethylmalonate	Amino Acid	Leucine, Isoleucine and Valine Metabolism	15765	LC/MS Polar	2054	2785	131.035	601-75-2	11756	11263		HMDB00622	35013784	15155528	27710002	28570636	27489116	17914264	27090932	30651444	21960970	18397116	14731964	20714912	22434328	24926164	17673548	29238668	30784014	45285448	24986582	39942232	14150121	24465908	20076598	30199080	21794968	22974040	26285660	19553012	34417648	39368204	39777508	36124980	24885600	30587040	25554974	20426040
76	formiminoglutamate	Amino Acid	Histidine Metabolism	43493	LC/MS Pos Early	100002500	1880	175.071	816-90-0	439233	388370	C00439	HMDB00854	1187619	289821	615652	483017	1377625	547508	429692	917411	1077200	1360431	649419	748026	555886	561496	872918	643464	194572	341965	624426	280905	755216	986215	252397	208750	765027	214236	2340101	828629	714736	705398	514185	706686	615809	1030836	309326	710953
125	fructosyllysine	Amino Acid	Lysine Metabolism	46227	LC/MS Pos Early	100005373	2784	309.166	21291-40-7	123708	110281			11213380	7988882	4830639	11060476	18549862	3714597	8816575	7522203	11735722	12338551	16270852	8037728	11151336	9940345	7622447	12999868	8525644	8066830	13679880	8170856	11939615	3114865	11271346	5398634	15018147	6559679	12081929	8000950	10776298	6725239	7351206	13832448	12958299	11094780	8914431	11123307
50	gamma-carboxyglutamate	Amino Acid	Glutamate Metabolism	38754	LC/MS Pos Early	100002679	903	192.05	56271-99-9	40772	37241		HMDB41900	333571	164242	228955	301322	303428	200721	201990	371675	268997	305773	224997	250585	225085	237138	214653	285055	261993	269586	254002	247402	245969	107225	151941	243511	149401	197377	345684	355230	274265	251160	216872	314954	243523	340110	202988	301279
190	gentisate	Amino Acid	Tyrosine Metabolism	18280	LC/MS Polar	100000447	905	153.019	490-79-9	3469	3350	C00628	HMDB00152	1381499	3929567	730837	1079185	885793	2331235	1084527	1802301	5640857	368726	267556	405584	1622075	1652077	424209	323619	406175	1846867	1104824	2259886	374246	226085	1596274	127831	612465	539882	1847420	3998249	3978454	946603	1028488	388219	1259221	127831	235433	12384076
42	glutamate	Amino Acid	Glutamate Metabolism	57	LC/MS Pos Early	561	1500	148.06	56-86-0	611	591	C00025	HMDB00148	120895904	77823408	76776832	82283672	214987072	68931480	76842912	124537888	55355732	64241968	124812480	67757416	89063872	67659840	74412488	106922312	54155172	83591816	110973536	82912016	165350176	95511472	44279576	43055316	30858064	95004280	179897168	77309360	88984880	79037904	138562848	173161824	80990568	90234176	51267740	88905208
43	glutamine	Amino Acid	Glutamate Metabolism	53	LC/MS Pos Early	563	1291	147.076	56-85-9	5961	5746	C00064	HMDB00641	569181056	695993152	701239808	789812672	674561792	569532096	784816704	650731456	765369984	577798720	741871232	681637056	754358528	722922688	638272832	663887872	692238528	793413760	717671936	884454720	606873600	484693568	633560832	566706688	774692416	604282240	703779072	647636928	716620352	692049344	711714944	675211264	767227200	647691520	426244736	703604160
114	glutarylcarnitine (C5-DC)	Amino Acid	Lysine Metabolism	44664	LC/MS Pos Early	100001593	2393	276.144	102636-82-8	71464488	21403175		HMDB13130	1591433	788977	820569	1039776	1138562	1165605	833667	651982	1999939	1127745	472283	535613	680044	929540	1185019	853129	1182776	1164225	667128	740808	1134676	464296	806796	975319	602126	765330	1621524	920774	769001	981376	1209983	686869	1021491	678433	718412	669580
1	glycine	Amino Acid	Glycine, Serine and Threonine Metabolism	58	LC/MS Pos Early	340	1375	76.0393	56-40-6	750	730	C00037	HMDB00123	50434508	79778664	73353600	84133632	55750296	63158972	98179104	63732736	98954200	49686916	67898088	82093520	85882336	111359672	65028684	62544776	75512672	86483744	70090968	117823672	58944776	39033096	60156112	30976612	60537948	89650832	45625936	61668616	58016660	64219844	85945392	54606564	74530472	51562808	37907240	77381160
426	guanidinoacetate	Amino Acid	Creatine Metabolism	43802	LC/MS Polar	344	2884	116.047	352-97-6	763	743	C00581	HMDB00128	1083741	723600	1243170	1122708	873325	901083	1115428	712688	906194	526708	923519	695035	1296859	1373081	963004	582046	1022806	606526	1042131	1194359	898293	371910	794647	648130	886759	1094007	718279	920273	1177701	784717	1035007	636238	726857	668688	549825	961735
456	guanidinosuccinate	Amino Acid	Guanidino and Acetamido Metabolism	32446	LC/MS Pos Early	100001212	1892	176.067	6133-30-8	97856	88329	C03139	HMDB03157	389932	327948	361942	444931	291946	338123	349464	497222	527168	631692	504038	337893	240539	480950	426685	740141	320572	433541	259224	591622	410874	139624	223705	93253	579964	170399	665276	484657	640153	161713	370621	132268	627442	192643	262252	1173105
66	histidine	Amino Acid	Histidine Metabolism	59	LC/MS Neg	355	755.9	154.062	5934-29-2	6274	752	C00135	HMDB00177	29385432	34487460	35050056	31096620	25700394	33184658	30245096	28741628	34868584	38252152	31730442	29895728	36868652	33604272	35184644	33639216	29455312	28129648	42039296	33636928	35848936	23759878	24216228	30456380	38851288	31862872	29902240	35712744	26635808	35096488	27576410	30519908	32816866	29896176	23871028	37554784
396	homoarginine	Amino Acid	Urea cycle; Arginine and Proline Metabolism	22137	LC/MS Pos Early	100000961	2882	189.135	156-86-5	9085	8732	C01924	HMDB00670	10416587	5092025	7599546	5627773	9576247	9665450	4784430	11866197	8210463	6183517	10666733	6536203	9865006	8681821	6564693	10271002	8133406	2299252	10267553	5811865	9878394	4518456	8441364	7627698	11165740	4741937	10744859	6581942	7599747	4450247	7079271	9051991	11106623	13578307	3405528	5913567
397	homocitrulline	Amino Acid	Urea cycle; Arginine and Proline Metabolism	22138	LC/MS Pos Early	100000963	1908	190.119	1190-49-4	65072	58582	C02427	HMDB00679	1513236	903599	729332	924176	1543910	803565	839153	2698090	2162000	4318094	1235226	1033736	984721	683970	1737510	1597199	1023220	1019996	574138	991359	1653660	460852	408079	1475619	1538411	666816	2690931	2964218	2601654	582086	847535	710219	1013734	1221363	570025	1836622
181	homovanillate (HVA)	Amino Acid	Tyrosine Metabolism	1101	LC/MS Neg	117	1649	181.051	306-08-1	1738	5323114	C05582	HMDB00118	270179	46205	87090	46205	46205	46205	65193	120627	46205	115931	73799	64028	62429	46205	123462	64614	84635	461240	46205	56024	53199	46205	46205	46205	46205	109466	106382	104676	101314	129005	46205	46205	46205	70022	97801	99843
72	hydantoin-5-propionate	Amino Acid	Histidine Metabolism	40473	LC/MS Polar	100002514	2080	171.041	5624-26-0	782	761	C05565	HMDB01212	655145	218594	397759	410952	820504	322307	233151	763259	717099	323873	858780	362043	100592	641905	449715	496858	82555	155543	544432	156981	350954	907425	97572	135683	519393	82555	2625827	917321	532823	82555	82555	198913	356822	270403	82555	824170
106	hydroxy-N6,N6,N6-trimethyllysine*	Amino Acid	Lysine Metabolism	62959	LC/MS Pos Early	100021123	2759	205.155						793194	536564	864001	1041198	519440	1271683	663166	1165842	1115051	765887	660380	880345	688490	587658	716152	779262	568439	548152	565845	614134	686267	682852	463531	682238	581623	553229	749608	675707	909697	674846	749939	834381	820769	782550	394023	717746
41	hydroxyasparagine**	Amino Acid	Alanine and Aspartate Metabolism	62060	LC/MS Pos Early	100020205	1149	149.056		97663	88149	C03124	HMDB32332	557468	452818	436980	515444	554571	392356	536454	564927	528267	456574	471265	485640	480664	514593	509995	556134	464493	575986	493014	388313	685692	316794	367777	368498	311637	526913	654088	592225	547225	412202	511588	798156	621847	593778	389080	567007
378	hypotaurine	Amino Acid	Methionine, Cysteine, SAM and Taurine Metabolism	590	LC/MS Polar	358	2763.4	108.012	300-84-5	107812	96959	C00519	HMDB00965	276945	613052	1371546	574490	418377	1238662	492641	335551	454192	269515	440767	570467	663969	686530	389392	711123	632437	652415	314654	457549	873134	413640	290353	313296	374150	824117	320887	428286	267921	445326	1359318	139515	510397	389853	518802	524809
77	imidazole lactate	Amino Acid	Histidine Metabolism	15716	LC/MS Neg	100000263	739.4	155.046	14403-45-3	440129	389128	C05568	HMDB02320	491202	342555	436710	580261	339093	459661	346270	307146	449305	588865	317167	685520	494594	618223	597034	287464	405979	800455	538521	587881	602702	254067	259160	712021	314944	345140	589521	348931	416486	411764	405566	235135	197320	623118	344367	220251
75	imidazole propionate	Amino Acid	Histidine Metabolism	40730	LC/MS Pos Early	100003434	2263	141.066	1074-59-5	70630	63798		HMDB02271	172302	416070	278857	139934	257250	169283	182370	159979	133300	345175	286437	318692	192338	315827	240627	46053	316803	418423	143566	291728	146448	185338	72046	178715	126745	172788	401681	222449	301885	147273	394013	1844158	1115651	1466952	229575	292135
259	indole-3-carboxylate	Amino Acid	Tryptophan Metabolism	38116	LC/MS Neg	100002185	1710	160.04	771-50-6	69867		C19837	HMDB03320	18991	18991	30379	18991	18991	50009	32912	40286	43564	18991	18991	18991	35413	18991	18991	46644	18991	24533	18991	22776	18991	18991	23899	30193	21446	18991	18991	25932	18991	23189	18991	41316	18991	30878	19403	18991
251	indoleacetate	Amino Acid	Tryptophan Metabolism	27513	LC/MS Neg	100001034	2200	174.056	6505-45-9	802	780	C00954	HMDB00197	2038873	2972701	1623788	1035662	1742946	6529309	1132989	6042139	5161862	1804080	2689058	1831727	2912127	2066270	2138408	1346619	2808701	2851920	2048544	1976693	2402056	989782	458498	2363413	1780564	2237181	1429205	5057525	1003263	2294465	1994375	1962770	2336045	1385245	1480395	2281840
256	indoleacetylglutamine	Amino Acid	Tryptophan Metabolism	42087	LC/MS Pos Early	100001731	2185	304.129		25200879			HMDB13240	443638	379565	161400	152082	390707	204114	122945	489896	228969	169867	325407	146752	416906	200826	216436	355819	118380	553519	360990	189225	473045	39300	28854	236925	79238	77968	198490	281446	101495	70183	252159	346811	289798	307442	323534	210761
250	indolelactate	Amino Acid	Tryptophan Metabolism	18349	LC/MS Neg	100000463	2286	204.067	832-97-3	92904	83867	C02043	HMDB00671	4308691	5018274	3383755	2881239	2744782	3518915	2742499	3885714	3928240	2558759	3713038	3659997	4608659	3949254	5013983	2849324	1606440	5808105	2364815	3662396	3379246	1564532	1438618	3211919	2313829	2926238	3201787	5425319	3051901	3162982	2546701	2563695	2208731	3066834	2601102	2413046
254	indolepropionate	Amino Acid	Tryptophan Metabolism	32405	LC/MS Neg	100001083	2795	188.072	830-96-6	3744	3613		HMDB02302	1728039	7040045	1452375	2178280	1228803	5284331	2039034	3889258	2246812	1240613	2236114	4988065	643554	986209	5738586	1072742	2936288	1224652	554452	2914487	1429926	495344	7433174	3492002	2165789	5077852	508792	2728812	3245655	10834071	1305797	3175045	4172044	99739	842687	1969965
338	isobutyrylcarnitine (C4)	Amino Acid	Leucine, Isoleucine and Valine Metabolism	33441	LC/MS Pos Early	100001055	2810	232.154	25518-49-4	168379			HMDB00736	5082617	5529250	2528367	4311193	2665312	5619853	5049997	10688502	9395127	5837515	5550990	2856858	4905553	3207625	10650616	4144891	3935823	2687112	3816370	3581287	3668435	4167092	1276740	2597602	7464639	1466484	6770396	9657745	5096135	3506904	4189835	1786063	3875239	2533247	1580353	7034079
307	isoleucine	Amino Acid	Leucine, Isoleucine and Valine Metabolism	1125	LC/MS Pos Early	376	2800	132.102	73-32-5	6306	769	C00407	HMDB00172	223667344	198480672	204058208	203734896	355088608	224921376	246838496	259027696	328687296	295962080	369291968	316518048	251574960	272567520	298627904	266145856	195923856	222278016	319195808	299892384	271254944	241609856	195054272	230087792	399105984	215641776	333773184	291176576	214500448	268118752	214043712	313857344	247038656	287896896	189408592	332260992
282	isovalerate (i5:0)	Amino Acid	Leucine, Isoleucine and Valine Metabolism	44656	LC/MS Neg	100000708	1564	101.061	503-74-2	10430	10001	C08262	HMDB00718	1923708	1309732	1399632	1124628	1941182	2106333	2106388	2841260	5130346	4393573	3085848	2201998	2380773	2228533	1902617	2230021	2163145	1762796	2932654	1914181	2643153	4706254	1621779	1687951	2869480	2529075	2448877	2423474	2050525	2392606	1828860	2746647	1988470	2093117	1284317	2010081
284	isovalerylcarnitine (C5)	Amino Acid	Leucine, Isoleucine and Valine Metabolism	34407	LC/MS Pos Early	100001393	3085	246.17	31023-24-2	6426851	4932271		HMDB00688	4611428	1445879	2339887	1648806	1769207	4461891	2133197	4625767	6096864	5334506	4050381	1658656	5015770	3096745	2566620	3330821	2396010	1667860	3133380	1847927	3073068	5225993	2089984	2011490	4813059	1469367	5309483	6207644	2470701	2416436	2896326	3496272	1876313	3557188	1777885	4499732
232	kynurenate	Amino Acid	Tryptophan Metabolism	1417	LC/MS Neg	98	2224	188.035	492-27-3	3845	3712	C01717	HMDB00715	301284	127984	250154	199171	307729	306201	417504	338516	580353	155823	340335	251379	586106	394405	373471	270464	242083	156930	385822	170837	250288	119556	98989	82409	272878	260210	321031	702556	238300	222921	128548	137155	144555	369196	211669	373319
228	kynurenine	Amino Acid	Tryptophan Metabolism	15140	LC/MS Pos Early	100000265	2739	209.092	2922-83-0	161166	141580	C00328	HMDB00684	13001957	6845878	12666995	11363426	11125604	9301037	12214646	15977640	12046889	12982265	9470264	9705337	14242656	13632473	10897349	11244153	5871963	13122714	14277202	11654393	10690932	9181662	8245161	9476633	9828623	10218769	13306596	15871034	9450205	13476708	11247160	15247018	10356489	15444033	6858430	10539566
374	lanthionine	Amino Acid	Methionine, Cysteine, SAM and Taurine Metabolism	42002	LC/MS Pos Early	100003892	1730	209.059	3183-08-02	98504	88959			371076	43541	43541	43541	97452	43541	138681	178665	104701	43541	43541	194760	43541	43541	172900	43541	121873	43541	73089	124860	58238	43541	43541	43541	61160	55035	92267	135191	43541	50694	43541	43541	43541	151973	61988	43541
271	leucine	Amino Acid	Leucine, Isoleucine and Valine Metabolism	60	LC/MS Pos Early	397	2864	132.102	61-90-5	6106	5880	C00123	HMDB00687	252877728	241100368	238462336	251475504	420522976	307345632	272294656	306228480	401660288	333340224	424501024	364781920	296957920	333697088	320143488	341016128	217354864	270720672	354591104	319784320	336857984	273932896	195450992	200425024	443619808	283075776	396221856	340271872	218567664	315476416	263399584	372480000	309174112	308724000	164331600	384030176
95	lysine	Amino Acid	Lysine Metabolism	1301	LC/MS Pos Early	407	2850	147.113	56-87-1	5962	5747	C00047	HMDB00182	160100400	140257824	172387296	197306624	203368256	188344832	162393024	159811664	218409856	175241248	193635872	178809424	237301456	214711072	163106816	237474240	158066448	135611808	198352128	147471648	206823808	145434208	132891240	105848504	208564768	134398480	194086400	171170192	148014272	128217344	137359856	206652704	244113584	179176384	100805032	202026960
345	methionine	Amino Acid	Methionine, Cysteine, SAM and Taurine Metabolism	1302	LC/MS Pos Early	415	2526	150.058	63-68-3	6137	5907	C00073	HMDB00696	80446608	73602472	101336816	85950760	83700616	94754944	86065840	91869848	139171328	112498080	118735416	97616264	132439552	110158704	75819032	83767104	88124968	91789472	118964584	112252360	99006144	77324496	77852224	62992100	154110080	90641312	103630272	106672592	88475880	85596680	89891984	102099056	91812896	88714208	78652528	95377504
349	methionine sulfone	Amino Acid	Methionine, Cysteine, SAM and Taurine Metabolism	44878	LC/MS Pos Early	100004635	1250	182.048	820-10-0	69961	63154			1040436	1067185	1242105	1173215	1543020	874903	1841469	1098970	1231025	1029413	990322	1121690	1120059	697525	778087	978970	1770964	1351606	1174074	2004581	991677	680858	732182	971650	829634	1349776	1890233	1291986	1854732	777948	912983	824886	1786392	737998	768939	1153435
350	methionine sulfoxide	Amino Acid	Methionine, Cysteine, SAM and Taurine Metabolism	18374	LC/MS Pos Early	100000039	1272	166.053	3226-65-1	158980	139840	C02989	HMDB02005	4598844	3748398	4721382	3722935	5432965	4046754	4148628	4862345	9267053	7929393	6203695	4364494	9975650	4724604	4609537	3777747	9978751	3932237	7096739	5876600	6548938	4393197	4691638	5317882	8759604	5266981	6891966	8898234	6445483	4425958	4630958	4897655	5158705	5347748	4241019	5710584
323	methylsuccinate	Amino Acid	Leucine, Isoleucine and Valine Metabolism	15745	LC/MS Polar	2051	2800	131.035	498-21-5	10349	9922		HMDB01844	861626	1224211	1484305	1819629	1320179	1216984	1183723	1112445	1204711	579683	886135	899105	1460056	1228720	928889	1087777	1682967	1117944	1262874	2158683	901773	619765	965933	1005493	646467	941384	1309456	1427031	2192723	1132457	1467582	1036579	1229388	1331003	665959	1189264
324	methylsuccinoylcarnitine	Amino Acid	Leucine, Isoleucine and Valine Metabolism	53031	LC/MS Pos Early	100009275	2589	276.144						253792	55304	123349	269292	202661	55304	55304	336917	155363	224017	55304	55304	55304	55304	110369	234158	93780	55304	163317	55304	140486	55304	55304	191674	55304	55304	259776	55304	163395	55304	162286	113199	247327	277018	55304	215075
124	N,N,N-trimethyl-5-aminovalerate	Amino Acid	Lysine Metabolism	57687	LC/MS Pos Early	100015962	2186	160.133			34236878			32306490	24060720	19183752	21496628	27729480	33782584	21772172	24449330	56826664	30041478	27150496	16779680	51266268	24387528	26914710	34758748	29052724	34790004	23729608	14048316	17326076	16258116	19298892	21021528	35468160	38038264	33336812	34329816	17125468	12861034	27186042	24037766	34285012	19515840	9329889	36797128
418	N,N,N-trimethyl-alanylproline betaine (TMAP)	Amino Acid	Urea cycle; Arginine and Proline Metabolism	62947	LC/MS Pos Early	100020217	2470	229.155						20447168	13907452	17585360	16545645	18073820	15400195	17225142	17348456	22744090	13058013	12430595	22838180	18099504	13633480	15932182	17607692	13215729	19233672	20056852	11932340	22292634	15013455	14824390	12671159	11082442	21329862	30420246	27295336	17872496	19653012	23051712	19414952	17299326	22881460	12775086	16416414
32	N,N-dimethylalanine	Amino Acid	Alanine and Aspartate Metabolism	63151	LC/MS Pos Early	100020371	1370	118.086	2812-31-9	5488191	4589713			10564429	9617142	7142044	4612768	8080641	10052613	9499428	12719880	10686749	16415039	9142187	7007494	5112359	6109930	5508854	6889299	10607208	11803530	7799583	5581868	3903485	8202175	5210981	9495966	14493710	4982013	9362711	13366719	17446848	6747018	10259089	14903747	23011584	5669311	4376310	10183266
71	N-acetyl-1-methylhistidine*	Amino Acid	Histidine Metabolism	43255	LC/MS Pos Early	100004299	2100	212.103		193270				556270	68251	78807	47426	301851	244567	125865	641803	180569	359294	99558	142292	231220	715958	173546	508899	163352	157297	111740	88271	393369	47426	96093	58433	55662	47426	707657	307544	225640	257134	239907	531321	75210	236953	627843	407074
53	N-acetyl-aspartyl-glutamate (NAAG)	Amino Acid	Glutamate Metabolism	35665	LC/MS Pos Early	100001612	1035	305.098	3106-85-2	5255	5065	C12270	HMDB01067	68158	46194	31652	52909	49678	55094	62668	52438	90604	90889	47303	136757	64223	99034	50575	57704	31652	31652	63302	31652	31652	74966	31652	83504	116831	66807	42783	80896	31652	106001	104989	78513	31652	81296	41032	31652
436	N-acetyl-isoputreanine*	Amino Acid	Polyamine Metabolism	62309	LC/MS Pos Early	100020487	2305	203.139						2270423	1126142	1581084	1719055	2403547	4686151	1510296	2510022	1511563	1597834	1401104	2290305	4520699	3084437	3356948	1841670	3467516	2627610	3199899	2551894	1884206	2073812	1491845	2204163	1255384	3009537	2173278	2175510	3364006	5911132	4450399	1970856	2123309	1817399	1332513	1867575
30	N-acetylalanine	Amino Acid	Alanine and Aspartate Metabolism	1585	LC/MS Polar	1110	1564.8	130.051	97-69-8	88064	79449	C02847	HMDB00766	20112136	16643104	19781294	20920850	19202772	30084016	20994328	22370888	28287124	20218180	16892484	21429954	20662432	24287272	22275174	21883766	16445451	24810656	17661172	22435304	21248576	15451099	15320978	16682972	17875266	21598448	24470872	26824728	23784960	19557468	21717436	22654398	19539340	23348072	16317105	30692792
402	N-acetylarginine	Amino Acid	Urea cycle; Arginine and Proline Metabolism	33953	LC/MS Pos Early	100001266	2245	217.13	155-84-0	67427	60752	C02562	HMDB04620	4679713	1740875	1772953	1981483	2620651	2019737	2367335	4059836	3830788	3001902	2122017	1654055	2496489	7095683	1526799	2442913	2033539	2025039	2453628	1737503	5384529	965157	1525422	1395783	1520214	1157071	4758193	2595822	1862831	2010550	2019920	2609150	2737407	2224429	2726876	5077376
40	N-acetylasparagine	Amino Acid	Alanine and Aspartate Metabolism	33942	LC/MS Polar	100001257	2250	173.057	4033-40-3	99715	90090		HMDB06028	1822895	1901986	1913767	2366007	1032047	1641692	1493570	2210138	3449940	1552217	2465936	2159919	4423676	3682402	3148195	3649508	2283332	3322683	3546389	2672777	3037074	752272	732561	1928794	2495426	2542934	3009566	1699598	2052631	2348882	2294759	1472423	1908474	1659145	1321225	3191003
36	N-acetylaspartate (NAA)	Amino Acid	Alanine and Aspartate Metabolism	22185	LC/MS Neg	100000787	620.5	174.041	997-55-7;997-55-7	65065	58576	C01042	HMDB00812	739180	863313	780267	747804	606668	814535	550961	964690	1153188	1074121	831015	1171079	1395911	636249	698145	895246	875686	692507	653668	802826	639268	731077	750290	824664	785018	940339	474473	657951	874150	892387	697693	809121	1127798	805156	717762	762994
80	N-acetylcarnosine	Amino Acid	Histidine Metabolism	43488	LC/MS Neg	100004046	1235	267.11	56353-15-2	9903482	8079136		HMDB12881	136603	33290	82180	47529	146589	79147	116410	119819	206344	129976	85567	136278	124053	103935	88001	130531	137524	63438	119943	116248	198250	50388	81244	83620	85267	254616	115601	126064	92865	104443	120602	92441	59678	205233	22797	187407
45	N-acetylglutamate	Amino Acid	Glutamate Metabolism	15720	LC/MS Polar	100000282	3106	188.056	5817-08-03	70914	1266066	C00624	HMDB01138	2685015	2015135	1942169	1697460	2302317	1169745	2046534	2565790	5047495	2667664	2747198	1478818	3487866	4480376	4045723	3697774	2621083	4532173	3754486	2795532	3904479	928701	1328349	1877459	2168995	3481887	4253572	2384800	2617458	1805647	2198966	1461999	1721181	2146556	2604635	6688106
46	N-acetylglutamine	Amino Acid	Glutamate Metabolism	33943	LC/MS Polar	100001253	2140	187.072	2490-97-3	182230	158492	C02716	HMDB06029	821204	679399	658158	594980	373800	297391	708497	706728	2615353	618608	592268	436664	864712	1542494	534099	838772	400950	1453056	583686	582335	521172	299445	517398	362552	639003	412520	1085943	604543	661781	785913	631737	922354	570667	498622	1027542	1456018
2	N-acetylglycine	Amino Acid	Glycine, Serine and Threonine Metabolism	27710	LC/MS Pos Early	100001006	826	118.05	543-24-8	10972	10507		HMDB00532	2998109	12346925	3538869	5332235	2440044	4266703	6362427	8166482	4990493	4657025	3017783	6395820	5307865	8699442	5940789	8558534	3167616	12537659	3431002	3767077	3487218	3828470	7439341	3533729	2532797	5130970	2731635	4897293	5454435	5064890	5557998	2930369	4620690	2901539	5264948	8116689
69	N-acetylhistidine	Amino Acid	Histidine Metabolism	33946	LC/MS Polar	100001293	2088	196.073	39145-52-3	75619	68142	C02997	HMDB32055	324094	342214	184417	208351	162280	234054	394318	489359	528388	411139	141277	251542	462674	572387	359724	460406	141277	455655	345336	312708	343636	141277	141277	313800	374031	223885	529525	446471	233525	299986	374841	497707	443936	310393	605387	504320
309	N-acetylisoleucine	Amino Acid	Leucine, Isoleucine and Valine Metabolism	33967	LC/MS Neg	100001276	2325	172.098	3077-46-1	2802421	2081100		HMDB61684	130751	46275	100173	46275	57733	46275	71186	119808	316471	124490	60079	46275	87991	88976	107576	46275	46275	69660	90617	47005	53354	46275	56097	46275	89910	46275	117860	106388	46275	46275	107648	94434	46275	60643	46275	121164
272	N-acetylleucine	Amino Acid	Leucine, Isoleucine and Valine Metabolism	1587	LC/MS Neg	1082	2400	172.098	1188-21-2	70912	64075	C02710	HMDB11756	125610	37022	63756	84786	37022	37022	115291	96445	385325	133361	73065	60142	86534	140171	81160	67029	37022	121658	79336	71981	61524	37022	72847	43084	83687	94885	82417	120948	91529	49467	96641	62538	38783	67392	61970	136322
346	N-acetylmethionine	Amino Acid	Methionine, Cysteine, SAM and Taurine Metabolism	1589	LC/MS Neg	1083	1787	190.054	65-82-7	448580	395338	C02712	HMDB11745	184974	133614	166621	162860	152611	120955	174198	170296	256551	210287	135856	143526	181250	170444	166848	184157	128405	175746	120664	166190	245090	169462	117758	115578	140532	143845	177267	187670	271110	149970	182525	126233	138875	116503	118144	376358
127	N-acetylphenylalanine	Amino Acid	Phenylalanine Metabolism	33950	LC/MS Neg	100001256	2597	206.082	2018-61-3	74839	67404	C03519	HMDB00512	111175	46188	69557	55445	123026	58294	83532	56483	472316	56944	39532	46368	133329	132143	49295	48748	18131	89566	57807	76765	40388	62652	31296	34606	34816	78940	96835	88887	83195	56567	70005	108729	37931	72954	118850	98948
446	N-acetylputrescine	Amino Acid	Polyamine Metabolism	37496	LC/MS Pos Early	192	2230	131.118	18233-70-0	122356	109095	C02714	HMDB02064	970486	665195	1190889	1016500	982114	1305865	1294713	963573	1193585	1831608	902701	1210859	1680220	1297980	1410462	892176	863293	2239305	968489	1347264	1539636	504673	752418	1268054	881692	990213	1244122	1501025	1163149	1214986	1117993	1686915	890439	1407212	1096787	1423022
10	N-acetylserine	Amino Acid	Glycine, Serine and Threonine Metabolism	37076	LC/MS Polar	100001851	2000	146.046	97-14-3	65249	58744		HMDB02931	18948736	16658331	17497596	17611004	17037160	14200239	18602678	18786432	22201240	21600426	16384232	18173176	20318620	19241376	21304444	17289244	16700959	20375432	15466387	19417926	17418656	13410603	12639970	14311793	17676896	17619292	23210998	21334938	23427480	17765820	22174794	19742360	18266950	18796624	12925911	26995982
380	N-acetyltaurine	Amino Acid	Methionine, Cysteine, SAM and Taurine Metabolism	48187	LC/MS Neg	100005466	800	166.018		159864	140553			93005	72649	73445	101685	67805	79960	68815	196885	188056	57770	56666	45767	166950	64848	62256	53936	46538	486847	70823	68819	62502	61907	33459	43687	44160	62440	128138	99498	39092	59224	108092	40421	69538	32130	58397	90727
17	N-acetylthreonine	Amino Acid	Glycine, Serine and Threonine Metabolism	33939	LC/MS Polar	100001274	1700	160.062	17093-74-2	152204	3841173		HMDB62557	21089640	20183212	19928696	21191358	21493296	18181370	20350368	19873364	26156470	20817068	17238848	22987616	23297344	24400026	26413836	21375836	16890604	23798200	18119236	23307240	19769702	14857924	15731662	16884032	18724108	18246308	26731600	24784968	23840628	20041820	25638094	26051128	20799368	24824262	15141342	27024362
218	N-acetyltryptophan	Amino Acid	Tryptophan Metabolism	33959	LC/MS Neg	100001254	2630	245.093	1218-34-4	700653	610602	C03137	HMDB13713	51971	17405	61351	39356	67139	49816	38589	48930	126054	21677	35270	32674	137681	78749	67903	39318	23625	54250	64166	61993	43261	26349	21482	23804	17405	55134	52029	111280	29678	37709	87173	124842	33062	94001	20226	54936
330	N-acetylvaline	Amino Acid	Leucine, Isoleucine and Valine Metabolism	1591	LC/MS Neg	1084	1704	158.082	96-81-1	66789	60154		HMDB11757	186724	96130	92836	58181	81244	100783	114771	123038	401903	123514	138043	119326	141021	144421	106973	139529	94352	100506	108143	134146	127608	110873	58181	65915	109881	159406	92664	167076	129050	91994	149508	132860	168197	95309	95408	173807
408	N-alpha-acetylornithine	Amino Acid	Urea cycle; Arginine and Proline Metabolism	32984	LC/MS Pos Early	100000285	2000	175.108	6205-08-09	439232	388369	C00437	HMDB03357	123429	36187	22163	26833	41444	22163	22163	22163	340132	22163	22163	22163	189017	22163	22163	22163	91077	22163	51974	36895	80123	22163	41617	22163	74865	22163	22163	26895	22163	22163	22163	26740	85063	64641	48558	22163
34	N-carbamoylalanine	Amino Acid	Alanine and Aspartate Metabolism	52340	LC/MS Pos Early	100006369	950	133.061	77340-50-2	426409	377278			158626	172587	158378	289164	112853	117740	193679	193915	199721	35418	131131	78031	185284	225823	35418	80661	237385	138968	113599	271994	100107	35418	69769	48364	81938	35418	200570	319906	465195	70767	190821	561915	228790	53431	59388	68986
407	N-delta-acetylornithine	Amino Acid	Urea cycle; Arginine and Proline Metabolism	43249	LC/MS Neg	100004523	858	173.093		9920500	8096135			394609	389335	692214	572235	1043177	1404424	533152	1147281	1079248	162088	515828	1605050	2371829	109668	1025923	122208	2921244	671790	555665	1118640	571185	99377	661438	886696	584144	852672	476285	725208	1037585	452668	1534395	114107	624507	688277	122664	337025
234	N-formylanthranilic acid	Amino Acid	Tryptophan Metabolism	43549	LC/MS Neg	100004561	2150	164.035	3342-77-6	101399	91624	C05653	HMDB04089	72152	54304	54304	61656	54304	64792	54304	54304	196846	97830	54304	82914	78617	60254	161413	54304	99212	78063	54304	123336	54304	109671	54304	54304	93944	54304	75739	101792	74736	107147	55007	54304	108998	80310	54304	137865
347	N-formylmethionine	Amino Acid	Methionine, Cysteine, SAM and Taurine Metabolism	2829	LC/MS Neg	194	1543.8	176.039	4289-98-9	439750	388809	C03145	HMDB01015	380303	295497	385001	309753	373226	236439	389106	392152	479254	365002	322305	353793	464264	380528	372942	365020	324554	533358	326107	370775	306679	259708	215876	250961	366196	426677	415009	415568	485075	349392	354472	295002	251320	316415	283544	526319
31	N-methylalanine	Amino Acid	Alanine and Aspartate Metabolism	37069	LC/MS Pos Early	100001823	1580	104.071	600-21-5	5288725	4450824	C02721	HMDB01906	7718985	10567693	22941398	7755778	1968387	7950101	6619686	15440453	30582472	8707623	22358586	5736548	8074935	15517373	13028332	16544767	19270282	10070320	4528083	2371112	11859135	12248962	8924644	16176290	7322217	13932967	3374321	14027889	8805344	11854699	19514180	11319157	18037266	12453732	8576277	8508354
411	N-methylhydroxyproline**	Amino Acid	Urea cycle; Arginine and Proline Metabolism	62068	LC/MS Pos Early	100020215	1145	146.081						1359539	567540	211375	322505	462548	219564	253395	269729	595959	236509	355650	417851	667738	428358	239274	736552	3075082	619938	586040	650851	315032	362053	254302	156945	837110	636708	664071	765141	385485	140678	867620	1076143	236381	323940	140678	179064
417	N-methylproline	Amino Acid	Urea cycle; Arginine and Proline Metabolism	37431	LC/MS Pos Early	100001956	1335	130.086	475-11-6	557	541			68866864	63619408	86176272	30929266	18649958	24182154	44501644	58480156	110828024	46229332	104418528	29618886	50985284	64261928	58835412	60218476	160318960	56611288	25766652	27873810	40618280	50588932	46141392	47819056	60355412	55280440	24394348	118259016	39434576	46814956	67394432	62761440	62489544	41071844	25628428	51814956
409	N2,N5-diacetylornithine	Amino Acid	Urea cycle; Arginine and Proline Metabolism	43591	LC/MS Pos Early	100004575	1310	217.118	39825-23-5	10398396	8573834			519251	310591	246077	149192	192190	476408	196084	351454	298633	252602	149177	398717	325972	186082	303476	287289	371462	275031	171954	251010	409429	199738	194772	234236	73456	227648	413083	194894	188753	390977	407489	302272	253775	210779	282494	276215
99	N2-acetyl,N6-methyllysine	Amino Acid	Lysine Metabolism	62954	LC/MS Pos Early	100020546	2168	203.139						628940	179134	693071	794463	498529	623132	1870044	1124093	365817	365012	427491	266008	221097	740063	71475	491890	160155	1509329	561451	191155	844194	40383	140523	40383	243974	59267	404234	121745	963213	2063013	1026152	511791	93777	243004	671341	2028080
105	N6,N6,N6-trimethyllysine	Amino Acid	Lysine Metabolism	1498	LC/MS Pos Early	189	2825	189.16	23284-33-5	440120	140379	C03793	HMDB01325	7154150	4275130	9816476	10119481	12231827	15326219	10454395	15921548	20783500	9365056	13978596	7601768	12387654	9992423	12047184	9234907	6366177	9552931	7073345	6813948	15997086	4920307	5180397	8511610	7328640	8010532	9308139	9000568	12203669	9550670	11227578	9214657	8395557	11574749	3540605	7581747
104	N6,N6-dimethyllysine	Amino Acid	Lysine Metabolism	62862	LC/MS Pos Early	100020417	2831	175.144	2259-86-1	193344	167778	C05545	HMDB13287	6847584	4759144	18435680	16858100	15070457	12551585	17321608	16993902	10728640	7992900	15917449	8068886	8863341	6817884	6541300	7093856	7023838	19533932	12766578	7696829	12850603	3822540	4690257	4158746	12008247	5102481	6370920	6152657	19453916	15214109	20539744	7583237	6071206	7610775	4283270	14350707
97	N6-acetyllysine	Amino Acid	Lysine Metabolism	36752	LC/MS Neg	100001734	1059	187.109	692-04-6	92832	83801	C02727	HMDB00206	237201	142077	167932	132603	246023	108177	155628	142554	689009	184026	132732	157227	216547	159202	268601	171251	191674	256941	102440	162454	169222	85739	89150	163686	140519	126097	214426	201914	213666	153473	145262	151366	145375	191523	79257	219307
103	N6-methyllysine	Amino Acid	Lysine Metabolism	62860	LC/MS Pos Early	100003415	2831	161.128	1188-07-4	164795	144469	C02728	HMDB02038	9061906	7152127	40862528	47656644	29444586	29083604	52956492	32961476	20050686	14354920	33582412	16930668	18416272	11035096	10383072	15292795	13121880	54112512	26933960	13038079	26815492	7836926	8611390	7746677	25398316	8188902	7257511	10460242	53212356	35501208	52549820	13744027	10482337	14318600	8925238	34857784
22	O-acetylhomoserine	Amino Acid	Glycine, Serine and Threonine Metabolism	31539	LC/MS Polar	100001129	1850	160.062	7540-67-2	439389	388506	C01077		986150	880972	934186	204108	772001	1387075	1014646	24796912	1520560	1380508	1104363	4889169	1292762	559161	1761981	784153	1545720	4765255	1997595	5909516	43578716	986641	204108	625852	879443	4085816	944028	1063601	1513452	1713680	1340204	525719	776336	1436508	716617	1050903
390	ornithine	Amino Acid	Urea cycle; Arginine and Proline Metabolism	1493	LC/MS Pos Early	444	2800	133.097	3184-13-2	6262	6026	C00077	HMDB03374	139589856	120107552	163876560	177559760	196036160	150932832	179395568	153163904	151115344	112559584	107930032	154102768	208869696	181489504	150814560	162389936	156976640	136501920	153543632	190785632	228430656	126669408	126731304	73162800	140347280	130871624	150782336	111833504	132427600	151688448	158430544	142454752	148341280	141539984	90796768	194553648
196	p-cresol glucuronide*	Amino Acid	Tyrosine Metabolism	48841	LC/MS Neg	100006191	2420	283.082	17680-99-8	154035	135751		HMDB11686	1147709	263564	28599	558554	145511	96329	248681	390566	264240	95071	185938	331717	28599	339358	155124	111840	812586	394358	178118	111237	3295960	66362	29235	28599	331118	28599	829556	305266	517529	163971	311369	201339	815334	260018	28599	989126
161	phenol sulfate	Amino Acid	Tyrosine Metabolism	32553	LC/MS Neg	100001510	2156	172.991	937-34-8	74426	67018	C02180	HMDB60015	26163644	21537914	39259324	7309788	17495836	8947562	14472722	16329899	33964872	42212588	4247588	24623688	8754607	30512382	17011236	33615284	32851190	7554958	6308601	22158726	10126254	3407480	10680412	2760278	7851487	9693052	10653308	17878382	11219679	10899250	9064095	20090436	13816525	5330540	27525544	22869128
136	phenylacetate	Amino Acid	Phenylalanine Metabolism	57745	LC/MS Neg	100000011	2150	91.0554	103-82-2	999	10181341	C07086	HMDB00209	202339	152254	29308	137349	76557	149878	92000	173959	325599	191817	67080	110333	29308	47968	68366	85183	248629	227464	147055	101364	187874	41200	29308	29308	323899	29308	203567	189390	86948	150681	118062	55941	170161	183279	29308	152397
126	phenylalanine	Amino Acid	Phenylalanine Metabolism	64	LC/MS Pos Early	460	2878	166.086	63-91-2	6140	5910	C00079	HMDB00159	228187584	174314640	251355952	216477568	286073504	239543952	253449536	229291024	252896016	314025632	241246160	228968432	286664096	234719200	259523424	230691568	183881184	198560688	296586016	290278720	239120896	274313056	171188992	177367120	289220608	307268352	255340880	278352800	195963280	228678832	214469088	248858240	226583216	242307440	211519088	235902096
132	phenyllactate (PLA)	Amino Acid	Phenylalanine Metabolism	22130	LC/MS Neg	100000774	2208	165.056	828-01-3	3848	3715	C05607	HMDB00779	594577	1815441	630604	364050	621869	542167	512736	348109	896674	531890	554906	776868	951522	630025	840584	318862	340391	702015	603437	950162	369251	521227	333139	447580	780852	741314	706963	840212	657646	706047	440284	384133	366033	653599	424152	243897
131	phenylpyruvate	Amino Acid	Phenylalanine Metabolism	566	LC/MS Neg	241	2515	163.04	156-06-9	997	972	C00166	HMDB00205	93036	72847	192322	93622	117514	139122	115856	82908	133309	186323	229581	98457	139994	129563	112003	98335	43688	43688	163641	188447	66632	176872	74075	89809	110924	115370	96287	151198	132579	132907	113090	176391	92520	123791	43688	110349
242	picolinate	Amino Acid	Tryptophan Metabolism	1512	LC/MS Pos Early	1022	910	124.039	98-98-6	1018	993	C10164	HMDB02243	434865	103294	327765	278450	357758	601386	307730	535260	19010120	982510	199503	342404	643949	306008	356148	244823	453082	559663	324145	521378	154840	277921	151863	186928	520842	153349	355032	1020985	534815	379537	548813	103294	368996	453912	337571	510584
118	pipecolate	Amino Acid	Lysine Metabolism	1444	LC/MS Pos Early	1025	2200	130.086	4043-87-2	849	826	C00408	HMDB00070	11714981	7285773	23142732	11184450	32085054	23640480	8298799	23037260	13633220	31995910	11781828	12525900	121256928	13597735	61205412	15047284	14287607	8871603	10442098	54982280	22714716	7978295	10105512	19066560	66365988	19931382	15723001	7843252	18289318	27668206	13420157	16194215	23459910	10469753	31934710	10355743
414	pro-hydroxy-pro	Amino Acid	Urea cycle; Arginine and Proline Metabolism	35127	LC/MS Pos Early	100001167	2128	229.118	18684-24-7	11673055	9847785		HMDB06695	5245561	3963801	3463203	9080726	2028339	4948242	8720080	6945602	8460983	6598326	3953349	8479525	9619335	4777948	2364894	7899484	2771428	8897419	5535166	4049490	6317474	1991912	2177363	2913329	4210453	4739263	6149566	3614864	4042414	5822687	5926579	7066756	5034796	2872612	3834375	5623601
398	proline	Amino Acid	Urea cycle; Arginine and Proline Metabolism	1898	LC/MS Pos Early	480	1603	116.071	147-85-3	145742	128566	C00148	HMDB00162	932049664	910666496	926489920	681260928	979825152	501202752	896357312	712366144	979110016	770222656	968492928	685733504	926407104	836653568	680080384	736378304	850312512	812288448	958122176	955535360	708208192	523980608	713046784	608231104	967540480	646855488	948569664	1223901824	687252288	769232960	830366976	808671680	700322560	802939968	545453184	961473408
52	pyroglutamine*	Amino Acid	Glutamate Metabolism	46225	LC/MS Pos Early	100001540	1900	129.066	2353-44-8	134508	118562			30826280	33497878	27152088	40134032	25197856	21998544	54471316	24744894	36048504	58783428	19883352	74778680	39323832	16941982	39348452	18250936	30159212	98281176	56063468	51112524	35799960	19410276	57073856	66978952	39363520	67647056	31216432	29137358	59377928	76913384	130982720	132556528	30529180	23226820	44682656	23593034
60	S-1-pyrroline-5-carboxylate	Amino Acid	Glutamate Metabolism	42370	LC/MS Pos Early	35	1528	114.055	2906-39-0	1196	10140206	C04322	HMDB01301	935468	1251857	696405	915958	745091	622050	682166	970581	1466942	1319150	1024621	573152	2486789	1200463	755429	1141977	1314083	962145	1483230	1223331	1450833	615326	907711	863921	1132359	974639	1232962	1434940	883428	727162	659832	735735	1277259	540684	446713	1456059
356	S-adenosylhomocysteine (SAH)	Amino Acid	Methionine, Cysteine, SAM and Taurine Metabolism	42382	LC/MS Neg	197	1832.4	383.114	979-92-0	439155	16788012	C00021	HMDB00939	37862	18466	31687	33666	18466	24278	34155	26699	18466	21781	18466	27199	18471	18466	40909	40071	30047	27525	18466	38943	31546	26958	18466	18466	18466	26642	28134	27009	18466	22477	35927	23487	28694	18466	18466	27802
366	S-methylcysteine	Amino Acid	Methionine, Cysteine, SAM and Taurine Metabolism	39592	LC/MS Neg	100002749	880	134.028	1187-84-4	24417	22826		HMDB02108	227610	480416	474140	497882	917565	980356	656363	420689	393926	223389	271992	519626	786486	401110	665357	460757	434156	493171	334006	1079992	356820	230063	806540	252088	621739	932200	187425	485841	444093	1089203	560937	396156	411415	415765	858323	340976
367	S-methylcysteine sulfoxide	Amino Acid	Methionine, Cysteine, SAM and Taurine Metabolism	43378	LC/MS Pos Early	100002927	900	152.038	6853-87-8	82142	74136		HMDB29432	1826081	3765197	3914504	4639726	11999764	15335490	8666862	3250220	3375671	1540353	2801873	6182878	7712167	1550050	3981125	4152906	7392061	2854458	2852821	6971737	3354188	1037224	9646286	1326527	3038674	11348211	2171032	2406812	4621449	14349435	5777539	2708049	3966750	4152469	6092232	2470431
348	S-methylmethionine	Amino Acid	Methionine, Cysteine, SAM and Taurine Metabolism	38127	LC/MS Pos Early	100002183	2555	164.074	3493-12-07	458	8351775	C05319	HMDB38670	597744	705693	4099047	1131791	118172	3118819	1108873	1791272	2996914	1131177	1688124	513880	1253631	1267977	1177128	833427	2096304	1463147	493628	460659	1528235	1023940	1683197	1753330	868664	1864538	252279	2782102	1163671	4867740	2114603	1881029	1242789	1251925	1369531	662323
4	sarcosine	Amino Acid	Glycine, Serine and Threonine Metabolism	1516	LC/MS Pos Early	1023	1280	90.055	107-97-1	1088	1057	C00213	HMDB00271	10640915	9633817	15047172	10666264	8882165	20855612	11924122	16494617	16275279	14068125	10760634	17281472	9799480	10053572	9500517	10111170	10713984	12335663	9548971	11183246	9299462	15817233	7307113	9913935	10044607	6949743	10869363	14294303	14368390	14143693	13816925	12005442	13691149	9970211	7336633	13105624
9	serine	Amino Acid	Glycine, Serine and Threonine Metabolism	1648	LC/MS Pos Early	503	1239	106.05	56-45-1	5951	5736	C00065	HMDB00187	102147592	128066992	124813784	125130536	105189304	107207736	147780320	104025352	135066000	114754080	115290672	120126128	161473280	155114672	125107208	121631456	137680240	92276960	138842240	188232992	113622864	80324928	132465848	71769328	158298448	134070672	88734120	113375408	125037832	114581064	143298096	94681528	120339968	97768328	63400364	146116160
243	serotonin	Amino Acid	Tryptophan Metabolism	2342	LC/MS Pos Early	504	2550	177.102	153-98-0	5202	5013	C00780	HMDB00259	203461	945384	366404	112559	116116	1369077	112559	697825	252503	351775	765781	601086	841718	435511	199674	1103677	369934	112559	173923	117777	804083	405762	538813	841929	299407	641861	196837	624881	308021	112559	1522058	112559	494394	694778	302938	375634
379	taurine	Amino Acid	Methionine, Cysteine, SAM and Taurine Metabolism	2125	LC/MS Pos Early	512	660	126.022	107-35-7	1123	1091	C00245	HMDB00251	38269008	41368504	59790736	42518796	25555942	57294224	35120108	33637292	26600008	19806296	25686230	25934280	45856248	29624476	39035532	53476332	42326484	41831296	32415794	30304140	54565372	27333722	19379768	25483342	21557360	41556536	29711736	40404132	24586672	28912024	53387688	18895550	36121360	24974156	22333482	29978386
16	threonine	Amino Acid	Glycine, Serine and Threonine Metabolism	1284	LC/MS Pos Early	564	1514	120.066	72-19-5	6288	6051	C00188	HMDB00167	157421600	110109280	173266768	159266096	153817792	133859072	168588368	140246960	269301824	155181536	234316048	138466656	208195920	253673696	154796144	116161000	179342608	128414704	165343472	155929968	200754304	85670864	160432736	145515472	261057344	84869368	151147392	141448800	187266368	119152120	175550784	151624912	141863488	184613296	118883080	162221328
213	thyroxine	Amino Acid	Tyrosine Metabolism	2761	LC/MS Neg	1094	4808	775.679	51-48-9	5819	5614	C01829	HMDB01918	284903	266725	334824	327750	244606	211852	262007	240305	328275	380905	198681	218019	162781	331689	215273	183172	217964	235191	243870	234499	175560	221578	137592	364152	263344	191106	225654	340573	193081	326981	260162	262741	265007	298992	218819	280020
317	tiglylcarnitine (C5:1-DC)	Amino Acid	Leucine, Isoleucine and Valine Metabolism	35428	LC/MS Pos Early	100001597	2962	244.154	64191-86-2	22833596	17216200		HMDB02366	830831	415558	509697	418004	498400	606236	294318	1196818	1004216	656044	300122	548881	488482	346264	690649	506309	651300	684920	376520	531223	960388	365745	321214	318253	457052	274771	846734	512993	395826	330415	689774	317627	342840	580173	354981	757119
412	trans-4-hydroxyproline	Amino Acid	Urea cycle; Arginine and Proline Metabolism	32306	LC/MS Pos Early	1001	1064	132.066	51-35-4	5810	5605	C01157	HMDB00725	15906196	20858784	18964078	21193344	30395970	20213670	23984646	18599872	56410948	30365748	25567940	18156086	44145144	40304592	27182236	19612412	34496228	22097332	21848100	17389062	36834088	8547844	16064822	31393148	27320618	15251998	26715702	25257578	19138324	19446168	20346576	21597560	23451108	30147368	15633442	27596900
73	trans-urocanate	Amino Acid	Histidine Metabolism	607	LC/MS Polar	537	1882.5	137.036	104-98-3	736715	643824	C00785	HMDB00301	2206311	708869	783289	1100396	1005553	1866501	1030135	988845	1086608	2313736	719454	940177	711602	1165822	676454	1094730	1048012	797969	614349	795750	876108	1040800	891647	1756038	1382236	608625	920889	696416	735536	703696	2012387	978313	4642282	1507296	1771353	707600
217	tryptophan	Amino Acid	Tryptophan Metabolism	54	LC/MS Pos Early	565	2986	205.097	73-22-3	6305	6066	C00078	HMDB00929	128770680	91225192	150277776	125792392	147680240	159835088	126045920	143811872	137037552	146403504	142254880	138530688	210788928	172813200	161051440	138264848	115668056	130329648	176759104	161593904	140650048	107024848	99826840	126895608	164780560	137003376	128076832	182469168	99739432	171512464	161561696	181366368	127313952	153894048	89975272	146296272
226	tryptophan betaine	Amino Acid	Tryptophan Metabolism	37097	LC/MS Pos Early	100001743	2673	247.144	20671-76-5	442106	390633	C09213	HMDB61115	22175148	3930886	87801424	64233088	86611800	45617376	60896944	79804832	29928992	20862870	22762354	75057128	32989276	33487292	56213856	32031200	110216992	9234876	16643716	78984824	17280784	5706613	13231219	4571151	914862	103683512	15751630	60381080	21485780	93987704	42732856	2321437	75993832	24506700	1435361	15557419
197	tyramine O-sulfate	Amino Acid	Tyrosine Metabolism	48408	LC/MS Neg	100006092	1565	216.034	30223-92-8	153005	134849		HMDB06409	16832	16832	65661	149550	46148	16832	488255	16832	74454	579761	16832	16832	19559	137439	44974	126513	83058	276455	16832	16832	79571	16832	16832	16832	102615	16832	19773	41845	16832	95632	16832	16832	26743	16832	177243	143650
143	tyrosine	Amino Acid	Tyrosine Metabolism	1299	LC/MS Pos Early	815	2430	182.081	60-18-4	6057	5833	C00082	HMDB00158	84998864	46927992	72153240	60728060	88219208	57884412	64435048	70909056	79698800	70900808	80342648	67300264	120526960	91938168	67697784	68246040	54169392	76958656	80937864	77426312	70420248	53813048	32296840	30411586	106215056	59927164	96007496	90348112	59195600	58177300	57403352	74853360	66676176	76575800	38797088	93345232
388	urea	Amino Acid	Urea cycle; Arginine and Proline Metabolism	1670	LC/MS Pos Early	533	700	121.072	57-13-6	1176	1143	C00086	HMDB00294	273091648	100994792	153553344	172064880	178827296	138163088	105234000	319109888	275383552	217570192	188115920	132362584	122318808	144250192	204780704	158860496	135082496	131934232	103210720	174443664	244176320	81888856	47607388	92298560	144669616	77635280	219768832	243115488	136825152	109911296	125829176	145021888	207211472	126685584	57361744	306609664
329	valine	Amino Acid	Leucine, Isoleucine and Valine Metabolism	1649	LC/MS Pos Early	566	2479	118.086	72-18-4	6287	6050	C00183	HMDB00883	417224064	337870848	381513600	347400896	674429376	468183200	366814912	546276224	715975040	588042880	649947584	527590656	462969120	537634880	578001920	577772480	352705984	416654112	486213152	426734272	549938688	435395968	260581728	346823936	657910528	355926016	600327168	606364032	456139552	418225120	413655072	508876832	461341312	483767776	244268320	634263360
173	vanillylmandelate (VMA)	Amino Acid	Tyrosine Metabolism	1567	LC/MS Neg	1111	941	197.046	55-10-7	1245	1207	C05584	HMDB00291	137090	109230	53453	53488	61571	67414	58479	128724	104921	35094	79041	84604	63304	78856	35094	97157	35094	74277	112890	52486	88416	60268	44508	35094	69129	89559	193943	67073	35094	113903	79922	49283	95691	75937	103241	35094
238	xanthurenate	Amino Acid	Tryptophan Metabolism	15679	LC/MS Pos Early	100000015	2236	206.045	59-007	5699	5497	C02470	HMDB00881	275297	30211	185019	171985	252528	30211	157229	396184	304129	594685	286459	139276	529430	359675	412928	199401	118996	70369	113617	138366	224743	40138	102750	132105	166496	38607	347417	767161	188654	142457	50279	30211	81870	340029	185266	550388
1018	1,5-anhydroglucitol (1,5-AG)	Carbohydrate	Glycolysis, Gluconeogenesis, and Pyruvate Metabolism	20675	LC/MS Neg	100000580	802	163.061	154-58-5	64960		C07326	HMDB02712	39107692	8276492	49719248	26735500	24709100	29252180	61900816	39826808	32617178	18021082	33673960	38670876	37531312	39218360	21012740	20451440	22762020	35867988	36723900	22394836	20385968	43846036	19772332	30471826	46567064	44270696	49429812	40851392	19549728	38645920	53018608	47478396	16807716	36632516	24436254	11732103
1035	3-phosphoglycerate	Carbohydrate	Glycolysis, Gluconeogenesis, and Pyruvate Metabolism	1414	LC/MS Pos Early	132	590	187	80731-10-8	724	10669764	C00597	HMDB00807	417069	363118	389287	366976	178775	171235	182323	569720	120346	310174	190787	410045	305562	309401	235615	575612	246660	432080	161324	292175	398893	672281	140629	144049	117514	334708	266924	259591	129420	152959	819653	147656	278367	314705	90654	221628
1067	arabinose	Carbohydrate	Pentose Metabolism	575	LC/MS Polar	828	1804.5	195.051	28697-53-2	66308	59687	C00216	HMDB00646	1856215	2739171	2512357	457574	2707386	734372	1782860	1728960	2395352	1743386	1592483	457574	2530034	1764848	2009550	1999445	457574	2918168	1749238	948269	2354031	1304861	1289586	1783196	1847541	1906418	1074253	1874892	1459081	1851285	1793704	1758081	1876069	457574	1390074	513621
1075	arabitol/xylitol	Carbohydrate	Pentose Metabolism	48885	LC/MS Polar	100006430	1932.4	151.061		6912		C01904		4215817	2140257	2558072	2890981	2816410	2142315	2450519	2291103	2789141	3206894	2933849	3088025	3361044	2354811	3275641	3182735	2284031	6273745	2167133	3467827	3589508	1596098	1271179	3010043	1932494	2625712	2948218	4536836	2508872	2005687	2772810	2986570	3112876	2621479	2253723	2701171
1081	arabonate/xylonate	Carbohydrate	Pentose Metabolism	48255	LC/MS Polar	100006115	2700	165.04						35393888	36729712	32251276	21505906	29696620	21937056	31259940	40499340	52092624	23909182	32476238	18284760	50857948	31385678	49282988	49148768	37548120	55214636	36539072	41873016	38061864	21349628	12326000	44397768	29143972	51631772	39401536	35536224	22691490	27640264	33233972	21562800	33068258	30044576	25665878	33912404
1217	erythronate*	Carbohydrate	Aminosugar Metabolism	42420	LC/MS Polar	100001320	2186	135.03	88759-55-1	2781043	2061231		HMDB00613	276127808	217555600	216347232	223160032	221824768	167982608	226461952	229455712	548152832	228341376	195525824	240687968	306897952	231820240	278077952	297384384	235232672	337073568	263238448	246499712	250004864	160444000	158370320	257383248	237693456	275685536	307437952	290357216	199419568	240216800	333668256	232373264	306215008	239070512	211423008	231617568
1136	fructose	Carbohydrate	Fructose, Mannose and Galactose Metabolism	48195	LC/MS Polar	878	2065	225.062	57-48-7	5984	5764	C00095	HMDB00660	54496996	29226176	73050840	31383424	31459324	7552443	30991780	44877416	41816960	32722504	53832552	30126260	75336640	51966876	50266012	57970860	58251208	46075672	75958376	43654960	43323768	101518984	12374746	56065056	78940144	39304960	49707072	49236208	16772549	132658640	31068676	20949928	21942768	29957120	10154004	57920272
1162	galactonate	Carbohydrate	Fructose, Mannose and Galactose Metabolism	27719	LC/MS Polar	100001026	3085	195.051	299-28-5	128869	114198	C00880	HMDB00565	7033402	213162	2253789	3543114	7095174	2418786	1342585	3796968	24451176	4362308	3384372	213162	4783223	3490793	3828512	2151029	5730847	6883302	213162	2817876	3085275	1468845	2611432	3040059	2433244	558327	8867247	53726392	2654073	213162	400480	2145672	5536720	213162	213162	26797826
1021	glucose	Carbohydrate	Glycolysis, Gluconeogenesis, and Pyruvate Metabolism	48152	LC/MS Polar	572	2342	225.062	50-99-7	79025	71358	C00031	HMDB00122	1657474304	1389423616	1212709760	1608367360	2770440704	1527363840	1773317120	2421883648	2288277248	1937217280	1680382336	1840434432	2126800512	1865037952	1617037568	2043414912	1613943552	1933383936	1830856448	1969992576	1710309504	1438487040	1401676288	1725212672	2201939968	1773886848	2054403200	2266880000	1838465024	2258451712	1984244736	1852675200	1952030592	1834543360	1553699456	2026461696
1194	glucuronate	Carbohydrate	Aminosugar Metabolism	15443	LC/MS Polar	100000257	3233.3	193.035	207300-70-7	444791	58552	C00191	HMDB00127	22009884	15171289	11878086	12967767	24351240	8713068	16472491	13292525	38769064	16204652	9900287	10083316	17396832	14383015	21480252	18575746	28981704	22772080	21668700	20740506	29252624	9861233	7008713	15846697	9082627	16265187	18917364	31787508	24390928	15053005	13277566	14193638	10824964	13650072	14655881	21569874
1041	glycerate	Carbohydrate	Glycolysis, Gluconeogenesis, and Pyruvate Metabolism	1572	LC/MS Polar	1052	2070.4	105.019	600-19-1	752	732	C00258	HMDB00139	207565856	228243184	145818944	138664512	160966944	140438736	93773448	191764176	287932480	232957552	172471776	204230864	560904064	153416016	219206560	233881600	300515136	131880664	229600080	199441872	227932896	193374576	159289168	209020512	168668112	296327104	161440800	238159232	185430240	242977984	201613776	165179056	234221600	116695336	119163872	223659280
1038	lactate	Carbohydrate	Glycolysis, Gluconeogenesis, and Pyruvate Metabolism	527	LC/MS Polar	482	1468.8	89.0244	79-33-4	612	592	C00186	HMDB00190	8398243840	7573705216	9143161856	7056631808	6976453120	6916911616	5348847616	5710133760	3754088704	4450015232	4312536576	5807698944	8163147264	7570113024	7987826688	9008372736	5257583616	7269325312	6400549888	8415810560	5508091904	6740455424	3253998080	4692682240	3570030080	8615144448	6614918144	3407433984	4935553536	6809551360	5596411904	4433563648	5445568000	6462811136	3977954816	5389181952
1094	maltose	Carbohydrate	Glycogen Metabolism	15586	LC/MS Polar	913	3329.4	387.114	6363-53-7	10991489	388469	C00208	HMDB00163	2800251	587565	1605045	1335920	695335	162307	162307	1809039	162307	1868796	337722	499879	2505983	619467	162307	1839449	360586	2183448	185252	541895	691282	489769	438553	1167527	2480882	660545	1139301	1112895	338015	162307	646813	414575	946180	1338053	355052	747050
1141	mannitol/sorbitol	Carbohydrate	Fructose, Mannose and Galactose Metabolism	46142	LC/MS Polar	100001740	2320	181.072		5780	440	C00794	HMDB00247	7604872	51028052	3274945	41120188	47700312	5027031	3649936	5229267	17897088	16046097	10650438	3742699	4910719	3709034	26706036	4387697	4701454	32721792	4151583	4850235	4524231	12014530	1821833	7208399	8630134	3154145	7486551	10228036	3264281	5013791	5397337	2490998	3394043	4537767	2772950	4930656
1142	mannose	Carbohydrate	Fructose, Mannose and Galactose Metabolism	48153	LC/MS Polar	803	2200	225.062	3458-28-4	18950	141983	C00159	HMDB00169	25634544	21303318	13193447	28866754	43029948	24686868	23548242	37392840	36217632	32790294	32277122	27804812	34341688	35354076	25931088	34725064	19517940	34378968	32711902	31266044	29488372	31575140	23911158	31306196	25155524	29717724	34098532	28950528	38151168	35403400	32787048	39146748	29491082	39467576	19971252	21707004
1219	N-acetylglucosamine/N-acetylgalactosamine	Carbohydrate	Aminosugar Metabolism	46539	LC/MS Pos Early	100006435	715	222.097		24139			HMDB00215	160466	149665	174110	124564	55233	55233	128184	134852	55233	182075	121109	151607	190603	139380	154032	129869	88018	243068	127503	154489	187498	218230	76115	135918	55233	194955	136744	154754	178209	55233	135374	201013	101328	159531	55233	146146
1216	N-acetylglucosaminylasparagine	Carbohydrate	Aminosugar Metabolism	48149	LC/MS Pos Early	1215	1212	336.14	2776-93-4	123826	21403014	C04540	HMDB00489	215485	250179	322515	263330	255511	400474	202290	371376	275023	244573	133461	321482	323447	316843	255616	330890	227010	340112	298147	267470	305530	403595	194751	294364	232356	238611	289869	282069	268857	267756	262912	248621	269918	261821	125992	252492
1205	N-acetylneuraminate	Carbohydrate	Aminosugar Metabolism	32377	LC/MS Pos Early	1162	660	310.113	131-48-6	439197	10292217	C00270	HMDB00230	650350	559304	501350	556750	428634	454143	533233	436114	501330	520272	468615	428393	537770	357491	632016	611042	457654	678438	349440	432684	720104	463391	462196	382762	349221	659365	604466	612216	458344	420402	442106	636050	510360	399821	408962	460719
1221	N6-carboxymethyllysine	Carbohydrate	Advanced Glycation End-product	36713	LC/MS Pos Early	100001768	2500	205.118	5746-04-03	123800	11217184			219588	223779	254677	293917	38858	242511	236314	259283	599039	342367	385891	133948	299909	478735	560243	462919	448085	448323	178861	39731	418345	203631	262444	833236	177334	282394	24879	913604	232388	378244	300446	487502	570112	266320	218576	237228
1037	pyruvate	Carbohydrate	Glycolysis, Gluconeogenesis, and Pyruvate Metabolism	48990	LC/MS Polar	823	1083	87.0088	127-17-3	1060	96901	C00022	HMDB00243	201797840	130608432	122332576	151164288	209671648	42555468	145055888	113334440	151220608	164498912	142009184	106779560	192820800	177991200	167639904	170969792	144969776	164778304	203987664	226673152	51260000	152743328	106163712	146145936	133969696	144689312	169349296	143264992	152655840	193992672	144955360	169558752	125938320	184930288	117327664	181844864
1060	ribitol	Carbohydrate	Pentose Metabolism	15772	LC/MS Polar	100000406	1789.6	151.061	488-81-3	6912	10254628	C00474	HMDB00508	415191	207137	325056	294963	339788	254955	306592	250017	230618	592713	375230	302635	679184	384224	300473	334483	166188	1108119	295345	286097	242681	348883	133535	298311	233150	278379	446589	355348	199048	202035	250018	404832	321522	384396	211650	185607
1061	ribonate	Carbohydrate	Pentose Metabolism	27731	LC/MS Polar	100001007	2425	165.04	5336-08-03	5460677	4574162	C01685	HMDB00867	19243552	15207959	12977331	16216921	17859284	11600206	23223044	24178598	21997584	15486514	15709398	14918219	24496360	19596104	27800476	26787316	18461098	51510660	29718958	23542584	23933350	11593751	10870387	24109224	19243368	22986880	28510854	22547880	14857223	16617208	17935974	20601692	18060246	22788896	14728561	20917518
1085	ribulonate/xylulonate/lyxonate*	Carbohydrate	Pentose Metabolism	61858	LC/MS Polar	100019968	2350	165.04						27539476	28725644	23691056	24550486	34928840	28728064	19065148	31299852	43308464	30621020	26042066	29992246	76093896	25598990	27957092	40503608	29009720	26941200	33161328	31426224	30782268	56164032	21248836	27937864	34690984	27846114	33590856	32459644	24078832	28702400	23055424	25553456	40394268	26830490	18100664	28178356
1117	sucrose	Carbohydrate	Disaccharides and Oligosaccharides	1519	LC/MS Polar	935	3092	387.114	57-50-1	5988	5768	C00089	HMDB00258	3228010	1627929	985747	552412	371003	96241	698463	1828641	590425	639204	223752	210508	588102	96241	508666	133855	1429065	5666479	830359	690972	608973	1021971	200989	968204	1297631	624418	649037	1194604	215861	790892	334999	272328	534396	208515	96241	1568105
1065	xylose	Carbohydrate	Pentose Metabolism	15581	LC/MS Polar	826	1727	195.051	609-06-3	135191	85957	C00181	HMDB00098	1004776	1040845	2327606	247024	845912	843489	903437	721946	1253946	849244	606768	856028	2608380	655366	803647	1725555	2265575	2405591	607201	247024	1109475	8328367	409334	2314180	1214963	1138404	1200425	785833	872812	967997	821834	782309	876996	247024	594609	247024
3790	1-methylnicotinamide	Cofactors and Vitamins	Nicotinate and Nicotinamide Metabolism	27665	LC/MS Pos Early	55	1940	137.071	1005-24-9	10129985	8305504	C02918	HMDB00699	1359801	408497	1269716	1582301	3356168	2371845	857109	2073669	4785133	2414192	591906	1520480	892821	1629394	635769	1610347	7529144	1527756	1091144	8183347	1843839	945702	1334746	1188310	812291	1211498	963621	841226	2548732	1336861	1280858	1160221	1491448	1824111	1572179	1105981
3825	alpha-tocopherol	Cofactors and Vitamins	Tocopherol Metabolism	1561	LC/MS Pos Late	1105	2522	430.378	59-02-9;10191-41-0	14985	14265	C02477	HMDB01893	158093696	95875400	107381424	129585656	144657664	116870544	106092208	142559088	149035120	142088768	141271184	90847568	145841392	97567032	105832728	159345328	129154072	152521744	159866784	113967424	134763520	52967976	64574208	130825192	109512304	128077432	191703888	148223936	110741136	115806480	100098448	126070184	136176576	114292352	121094968	145727520
3896	beta-cryptoxanthin	Cofactors and Vitamins	Vitamin A Metabolism	57591	LC/MS Pos Late	100001977	2560	552.433	472-70-8	6384256	4904571		HMDB33844	3898402	3369829	3969014	2743399	1177138	4078170	897347	2935768	2084114	1492269	1813528	5717234	5898841	1004003	3080197	2996134	5538773	1125203	4677873	2521160	1777768	3279526	4226093	25709572	3456192	2815679	1183222	4809442	2921808	4496516	4902760	4698595	979336	1004615	712956	1355584
3871	bilirubin (E,E)*	Cofactors and Vitamins	Hemoglobin and Porphyrin Metabolism	32586	LC/MS Pos Late	100001950	1045	585.271	114-25-0	5315454	4474753			833975	1420264	548927	1098017	1519359	1551211	1210178	1009965	1205647	805322	1286617	1961122	2083501	2575764	1256407	2334847	2198206	2268335	1954190	5684723	2930083	411245	2026492	874703	995920	2876496	2039228	1940645	2351919	3629487	1537047	1197994	1448019	1219789	2294159	1231876
3872	bilirubin (E,Z or Z,E)*	Cofactors and Vitamins	Hemoglobin and Porphyrin Metabolism	47886	LC/MS Pos Late	100001951	1265	585.271		5799469	4705847		HMDB00488	98458	134272	111883	115222	264304	357966	166635	127444	237797	118199	190440	325719	375633	442644	283223	346169	291444	367582	304114	663056	251751	64247	73596	168214	129752	285106	449847	449746	437660	557741	185300	244588	214577	207456	64247	333229
3870	bilirubin (Z,Z)	Cofactors and Vitamins	Hemoglobin and Porphyrin Metabolism	43807	LC/MS Neg	1090	4796	583.256	635-65-4	5280352	4444055	C00486	HMDB00054	479071	730951	594823	690318	1110561	2680999	896681	375790	941265	320831	884073	1493367	955400	2102050	1195686	2118329	1305762	1478299	1568460	4402759	2649337	172042	500997	383972	544510	1370274	1253273	1841200	2121309	3565124	1665557	838437	803952	533949	294175	1219025
3873	biliverdin	Cofactors and Vitamins	Hemoglobin and Porphyrin Metabolism	2137	LC/MS Pos Late	250	1016	583.255	55482-27-4;55482-27-4	5353439	10628548	C00500	HMDB01008	502965	695773	391672	996040	949132	1197945	919265	1696460	606438	783326	436232	1831795	443637	1930931	744227	3057341	968567	1319880	765053	2062923	2545105	1349036	895485	349627	321674	682760	1100823	914226	1219811	1335038	6397806	794412	1553244	898805	646126	786308
3892	carotene diol (1)	Cofactors and Vitamins	Vitamin A Metabolism	57635	LC/MS Pos Late	100015966	1720	568.428						12046342	6972034	7036368	7164489	4149654	11892901	3799220	13053976	9151686	11291339	9999944	8079583	19045092	3056952	9826715	13500623	20565260	7791480	9211152	9004082	26972444	3253497	4624647	12383465	5795362	4618250	9722494	13159364	11074302	9836918	5574671	5441809	4402050	6869955	9371849	17617884
3893	carotene diol (2)	Cofactors and Vitamins	Vitamin A Metabolism	57636	LC/MS Pos Late	100015967	1904	568.428						1902860	925170	1136409	1152444	862915	2345718	900826	1946421	1428113	1559810	2261028	2019001	4051731	740499	1931424	1598891	3285299	1025048	1303871	2293819	4976230	830740	650616	1611683	1446321	1116789	1103650	2341416	2033339	2501876	1550385	937040	651611	1510043	1666031	2420907
3894	carotene diol (3)	Cofactors and Vitamins	Vitamin A Metabolism	57637	LC/MS Pos Late	100015968	1948	568.428						968166	629450	747349	556566	287520	1222234	341818	1340699	571291	913857	1280431	1539641	1983725	385181	1254980	1568351	1656886	1106549	922516	1136402	2978834	678164	907559	1325430	651763	509030	591856	2083280	1437171	1170317	489269	558683	415344	920975	495367	1449031
3841	delta-CEHC	Cofactors and Vitamins	Tocopherol Metabolism	62287	LC/MS Neg	100020416	3422	249.113	84599-16-6	11536125	9710906			111597	23927	23927	23927	23927	23927	44963	41402	89269	23927	75522	63425	110548	59734	109775	59709	23927	155971	56803	127992	23927	23927	23927	23927	97480	73151	53447	61202	23927	23927	23927	39193	23927	60195	27487	102496
3833	gamma-CEHC	Cofactors and Vitamins	Tocopherol Metabolism	44876	LC/MS Neg	100002094	3843	263.129	178167-75-4	133098	117455		HMDB01931	465933	133677	224329	186057	389432	116487	538931	316081	1555396	36525	519018	319800	1319473	821908	596333	381734	269339	736986	577162	1187844	277201	225322	231059	217599	777509	801330	456002	552971	329971	231982	277649	383796	223654	333010	233496	741252
3847	gamma-tocopherol/beta-tocopherol	Cofactors and Vitamins	Tocopherol Metabolism	52473	LC/MS Pos Late	100008998	2384	416.364						35035432	25700164	19950906	22012656	11751598	21384830	32083816	32741294	40996968	15782034	23280268	16136403	43164028	31401280	41686104	9913214	11756994	31291852	21192556	25398796	8851561	8919105	18799698	19611800	25572866	17267620	26798656	32327332	16045411	20017248	11586508	32580680	12071763	28529314	16774178	25947484
3823	gulonate*	Cofactors and Vitamins	Ascorbate and Aldarate Metabolism	46957	LC/MS Polar	100001586	2750	195.051	20246-53-1	9794176	7969943	C00257	HMDB03290	15758633	13047198	11164275	15795489	14484417	8250356	14645826	14849936	20256154	14226259	14603758	10757250	13744284	22009252	16802112	16326083	13744810	31624592	18457862	14202754	19752760	8486977	5423321	13621729	9394944	18737362	18534626	25467596	11945844	9862896	18162688	15956822	18063676	14814842	16385736	14128169
3869	heme	Cofactors and Vitamins	Hemoglobin and Porphyrin Metabolism	41754	LC/MS Pos Late	100001386	1124	616.176	14875-96-8	26945		C00032	HMDB03178	742623	277915	148777	572899	648653	146412	482476	983726	116717	522555	139095	268086	50982	68099	192142	703302	182229	50982	226530	50982	775192	2235185	556869	225346	50982	50982	217868	214274	224364	50982	3012631	237778	584471	346180	340146	209112
3797	N1-Methyl-2-pyridone-5-carboxamide	Cofactors and Vitamins	Nicotinate and Nicotinamide Metabolism	40469	LC/MS Pos Early	100001468	1250	153.066	701-44-0	69698	62899	C05842	HMDB04193	1744681	213214	693919	1605779	5853630	1497203	605011	2335390	18722120	1388891	606998	2772528	539071	1041244	490751	1221825	5614553	664820	4855295	3337639	2545088	404720	498206	2945661	847723	908979	2058671	890272	1473010	669389	958036	5221297	981861	2642340	4120757	1642892
3798	N1-Methyl-4-pyridone-3-carboxamide	Cofactors and Vitamins	Nicotinate and Nicotinamide Metabolism	57584	LC/MS Pos Early	100001469	1260	153.066	769-49-3	440810	389671	C05843	HMDB04194	2809094	574719	2127178	3331436	6054179	2897954	1590790	6755666	574719	3712311	1139332	574719	1159635	2692106	599717	3333406	4815437	1795036	574719	4239910	5707043	2240666	988786	574719	1062283	3173901	4544449	3777560	4171032	602175	1219107	574719	2367787	2245887	574719	3187492
3778	nicotinamide	Cofactors and Vitamins	Nicotinate and Nicotinamide Metabolism	594	LC/MS Pos Early	432	1942	123.055	98-92-0	936	911	C00153	HMDB01406	2606683	2271709	2442946	2770764	1423467	2540821	3377930	3056105	1561416	2548206	1516667	3905631	3493027	1895718	1861023	3689991	2818739	2916013	2095616	5484611	3259409	4908091	2935898	2869701	1583576	4857698	1316586	1351290	1677018	3238164	3818178	2991549	2566158	3576001	1588555	2167351
3776	nicotinate ribonucleoside	Cofactors and Vitamins	Nicotinate and Nicotinamide Metabolism	33471	LC/MS Pos Early	100001316	1536	256.082	2625-49-2	161234	141635	C05841	HMDB06809	902475	262096	341054	267179	148305	187404	704005	362482	198896	418104	95352	528328	499253	799474	287494	819320	159827	356094	812288	598606	254577	553294	226868	409332	625108	419551	204213	319632	177654	198452	536673	325097	628842	359989	95352	291840
3822	oxalate (ethanedioate)	Cofactors and Vitamins	Ascorbate and Aldarate Metabolism	20694	LC/MS Neg	100000841	603	88.988	144-62-7	971	946	C00209	HMDB02329	7752159	7290920	5004317	4682682	5187374	4602926	2127566	9195936	8967333	9865829	6467930	7686009	25401992	5202554	6294220	8640089	9468970	4937684	6551557	5361220	7541220	6754892	7515364	7827492	6894975	8628987	4517044	7323617	7176020	9021859	6753133	7011670	9474100	4497659	5494184	6867798
3806	pantothenate	Cofactors and Vitamins	Pantothenate and CoA Metabolism	1508	LC/MS Neg	1024	1498.7	218.103	137-08-6	6613	6361	C00864	HMDB00210	626134	465153	709852	535171	2730477	793960	635332	1207272	2143161	1327831	692894	1013636	732636	748905	698104	1654045	1487508	1437776	844541	3364517	2545571	955750	624899	910807	475797	596236	924587	737260	575462	321524	511197	872665	1716630	515221	454523	1417051
3909	pyridoxal	Cofactors and Vitamins	Vitamin B6 Metabolism	1651	LC/MS Pos Early	491	2343	168.066	65-22-5	1050	1021	C00250	HMDB01545	502635	485364	629270	599998	1497621	989506	488685	833104	25762100	744560	640005	655591	1561055	662308	596182	992251	1403429	756239	764471	996417	1720472	535582	671031	739012	656420	1564207	594649	537822	688544	721374	687337	624244	634512	662283	755233	720373
3910	pyridoxate	Cofactors and Vitamins	Vitamin B6 Metabolism	31555	LC/MS Neg	100001121	2185	182.046	82-82-6	6723	6467	C00847	HMDB00017	389792	224212	286268	346233	3261354	899516	302183	1107908	53224832	776483	378474	462946	3287973	367725	735860	1173722	2880338	711857	547979	1172668	3345367	487522	276893	361104	156907	2958243	383519	759500	667227	390662	317886	315620	368630	353906	822619	1841215
3774	quinolinate	Cofactors and Vitamins	Nicotinate and Nicotinamide Metabolism	1899	LC/MS Pos Early	182	845	168.029	89-00-9	1066	1037	C03722	HMDB00232	322657	171509	167523	281724	324388	143028	326523	305565	208011	526471	246208	179379	179528	230436	262260	298673	175553	204243	175776	237516	317489	298707	224881	190177	167752	187201	347784	294759	151708	220745	115371	353486	316130	297369	107141	134014
3897	retinal	Cofactors and Vitamins	Vitamin A Metabolism	40807	LC/MS Pos Late	100004088	1666	285.221		638015	553582	C00376	HMDB01358	20253	23197	7923	7923	24552	31302	20001	56890	23911	32118	14365	61064	38128	60692	31547	26030	33910	47096	22573	22863	48339	7923	7923	22243	20726	7923	54451	31591	56289	41776	48448	43342	34327	7923	37296	44116
3890	retinol (Vitamin A)	Cofactors and Vitamins	Vitamin A Metabolism	1806	LC/MS Pos Late	498	1636	269.226	68-26-8	445354	393012	C00473	HMDB00305	10876160	10049439	9332858	8115065	12920435	9966366	8136542	18041172	15070742	17899846	6034504	9735860	18208760	14970695	11863457	11902101	8347416	19708296	10016243	8826460	11105429	2578732	5243711	14508399	6566806	8167500	19244368	15727027	9370514	9931074	14965967	11425551	12077195	9733202	9098914	15362754
3802	riboflavin (Vitamin B2)	Cofactors and Vitamins	Riboflavin Metabolism	1827	LC/MS Neg	500	3160	255.089	83-88-5	493570	431981	C00255	HMDB00244	31137	39508	51561	39738	95393	47437	40850	55121	588487	63349	25319	43205	19047	48370	72826	56874	138385	27459	48670	73217	32286	44004	28637	26183	22024	78230	34386	78998	37174	26793	56874	23335	83072	25154	20419	55302
3819	threonate	Cofactors and Vitamins	Ascorbate and Aldarate Metabolism	27738	LC/MS Polar	100001022	2384	135.03	70753-61-6	151152	133224	C01620	HMDB00943	210001680	247813408	148970720	159865488	207011264	232984240	87158168	278251200	301917248	375830848	191305072	249844752	609421632	155866304	295520448	345668800	362149504	192794208	273997728	341019328	275151808	212454848	195459312	225874704	200592000	333909760	228194128	294061312	260094048	322524224	320545792	283867360	359901920	229464320	200704640	252795264
3795	trigonelline (N'-methylnicotinate)	Cofactors and Vitamins	Nicotinate and Nicotinamide Metabolism	32401	LC/MS Pos Early	100001092	1388	138.055	535-83-1	5570	5369	C01004	HMDB00875	71131312	53906844	50299544	135396144	35838768	64424960	110694776	195916624	183197264	19239788	4419401	9054004	282312032	86912072	32396158	4660333	11219941	64864280	57023472	140619984	10976698	2914810	58910500	37050140	8440373	33574916	11751218	109851672	284537312	24495774	150035664	4569893	27563296	12144297	32587032	67596496
1227	aconitate [cis or trans]	Energy	TCA Cycle	46173	LC/MS Neg	100001359	580	173.009						11479741	13335438	9752593	8534518	8176628	4573469	8139871	10149277	8520841	10738274	7344340	9043888	9911583	6082160	8854168	7735918	8443496	11847844	13641207	13329876	5837230	7314390	3190811	10812702	6922601	11994258	13015082	8198814	9671044	10130976	4816375	8784120	8475797	11124558	6410164	10902420
1231	alpha-ketoglutarate	Energy	TCA Cycle	528	LC/MS Polar	93	2700	145.014	305-72-6;328-50-7;22202-68-2	51	50	C00026	HMDB00208	256655216	226540960	229838160	243879472	276466240	154408624	219336848	289387584	228934688	241666080	194799600	251640288	341251808	302042336	214103312	313288736	216317760	435366432	298314912	352338400	163759312	158668160	159799408	199254320	188456256	219034864	368001312	253902160	264079008	257870944	227091200	288054528	276786496	280472000	212461504	243248288
1246	citraconate/glutaconate	Energy	TCA Cycle	47076	LC/MS Polar	100006438	2600	129.019						53990024	26702432	37417976	159120640	27924968	151793968	68694776	69626912	67997480	7866226	8417332	7669229	120831080	97866184	9389719	9711318	10448017	40765248	35175432	58266584	8307905	8770875	34989384	21086322	8724132	10741986	9204226	62527500	221477376	10993245	85053960	8210837	10789724	9848021	9131519	46591776
1225	citrate	Energy	TCA Cycle	1564	LC/MS Neg	1124	582	191.02	77-92-9	311	305	C00158	HMDB00094	143367424	169959840	150911664	130336136	119966128	143560240	128782248	184070336	179353024	157542016	127723064	165525440	140980864	118078872	137403328	151449792	149630800	159353680	184146704	181107360	114427304	123380496	109250096	184136336	157362624	179949424	163311472	133566480	157536576	166874240	122346528	124087176	171745904	156142944	108455312	173451552
1235	fumarate	Energy	TCA Cycle	1643	LC/MS Polar	330	3084	115.004	100-17-8	444972	10197150	C00122	HMDB00134	5664878	6243100	6080169	4503243	5075460	5859238	4492945	3098371	5307205	4102188	3846871	4905936	9571363	5417049	6318305	7125944	6172947	8418765	6033534	11781308	4569143	4183298	3339817	4022426	4785718	7992231	6000446	3572745	3958857	8064719	3904835	3093142	4544239	4751919	5999236	6110413
1230	isocitric lactone	Energy	TCA Cycle	54724	LC/MS Polar	100009239	2970	173.009	4702-32-3	98259	88729			1390861	636132	1934267	1042876	1914793	868131	355059	2055432	737856	355059	468873	1721959	1833129	1210039	1010450	2159174	812204	3333062	1575471	2286027	746565	761824	796026	1318873	1166169	965066	2833345	1275218	1542777	1218977	1062144	1105052	1169433	1604349	1693841	1216462
1237	malate	Energy	TCA Cycle	1303	LC/MS Neg	409	615.6	133.014	6915-15-7	525	510	C00149	HMDB00156	8015217	8398859	7424736	5346821	5696226	6152903	5433323	5133068	7315541	6149880	4776488	8030051	8589370	6650989	7807084	8925170	8268562	10992001	6125517	10680245	6841230	7129346	4320008	5322147	4813962	10641943	5827232	4762383	5570626	9477709	6972995	3675783	5461034	6333541	7856449	6812458
1251	phosphate	Energy	Oxidative Phosphorylation	42109	LC/MS Pos Early	461	576	98.9842	7664-38-2	1061	1032	C00009	HMDB01429	39327276	45505916	35046712	39530076	43883376	48613712	56425972	45153132	55141808	42138112	37793456	60103856	52116372	35251616	55951032	43624356	41872208	58503832	46334788	49177576	37895884	31447608	30258258	31965404	43713580	46541628	53244400	72572864	44794720	49718712	39796140	41889752	31346132	30892244	32394020	44455668
1234	succinate	Energy	TCA Cycle	1437	LC/MS Neg	252	603	117.019	110-15-6	1110	1078	C00042	HMDB00254	5216633	4562848	4718671	5260728	3507519	4274764	3293225	3816770	4307426	3669653	3323119	4823438	4686961	4415298	4857929	5244979	4528218	4847041	3240985	5149822	3680515	3163845	2502609	3210203	3197114	5105125	4294059	3711037	2956288	4165943	3414810	3194032	4000683	4061175	2562129	4022130
1233	succinylcarnitine (C4-DC)	Energy	TCA Cycle	37058	LC/MS Pos Early	100001948	2291	262.129	256928-74-2	71464481	28639166		HMDB61717	732063	430291	554126	557379	903220	330781	532832	565648	755224	505317	511698	424400	440338	477770	630128	389941	515516	457791	787492	769750	567409	505879	407962	495461	463784	414076	1296688	565386	461609	445629	663632	649814	654365	815954	278641	425952
1399	(12 or 13)-methylmyristate (a15:0 or i15:0)	Lipid	Fatty Acid, Branched	38293	LC/MS Neg	100002344	5499	241.217	2485-71-4	151014	133106			3970343	7073919	3498552	4368548	2712470	2323591	4262665	5236981	6669542	3786829	2839038	5938204	2320900	3995640	1431681	5926219	3019613	7131579	2679399	1883408	2185933	2436504	2954168	4946820	2447026	1512968	5239054	2003652	8311128	2613862	2867701	5090207	2921224	5178814	3616122	1895148
1402	(14 or 15)-methylpalmitate (a17:0 or i17:0)	Lipid	Fatty Acid, Branched	38768	LC/MS Neg	100002945	5695	269.249		17903417				7845565	10253992	5228727	8995164	6452844	5772623	9371800	11678886	14485879	8647917	4781894	11696952	5168792	9500151	3349212	12875024	6529658	15586635	5302056	3459962	5804457	6915662	6610713	10917829	4745753	9998325	13852984	5867942	14702990	6017862	7611407	10898902	7150223	9134374	10022545	4433927
1406	(16 or 17)-methylstearate (a19:0 or i19:0)	Lipid	Fatty Acid, Branched	38296	LC/MS Neg	100002356	5993	297.28	2724-59-6	3083779	2340933		HMDB37397	931835	1116481	813313	830629	1211434	1423781	797171	972311	2171197	1302969	528271	1180698	1081380	1640915	401722	1169850	952027	1595745	467891	460013	674976	1071984	788804	1393406	642333	916100	2183077	672981	1789314	961845	1083760	1090079	1011981	1121431	1146098	587944
1561	(R)-3-hydroxybutyrylcarnitine	Lipid	Fatty Acid Metabolism(Acyl Carnitine)	43264	LC/MS Pos Early	100003926	2400	248.149		53481617			HMDB13127	526522	224829	187974	205706	258715	553004	257889	594819	471480	316209	120975	1882689	379596	318674	317389	522131	456288	1173014	334957	346765	180704	1405204	824438	193952	210914	295140	515611	774251	520635	489800	524498	206147	287826	405641	434481	377397
1562	(S)-3-hydroxybutyrylcarnitine	Lipid	Fatty Acid Metabolism(Acyl Carnitine)	52984	LC/MS Pos Early	100009271	2340	248.149					HMDB13127	784263	437645	514934	419599	532497	666459	380959	798604	477646	597510	218016	2298442	453102	320809	392471	538622	1175888	872041	696566	975881	449334	568769	644084	365104	245384	981884	583407	589810	682180	816781	644805	404913	475803	613068	808651	401347
2226	1-arachidonoyl-GPA (20:4)	Lipid	Lysophospholipid	46325	LC/MS Neg	100004442	5499	457.236	799268-65-8					196169	114813	242796	365145	128477	2025844	35744	225565	35744	158219	49022	142582	297721	159252	225361	876317	46350	121115	217132	530226	1515525	35744	170088	162417	64769	35744	185591	119867	210844	294182	1119863	159055	219897	203717	123568	328930
2222	1-linoleoyl-GPA (18:2)*	Lipid	Lysophospholipid	52690	LC/MS Neg	100009082	5483	433.236			24766514		HMDB07856	195434	115743	202588	241492	240903	389953	33019	170534	98059	193568	46640	169358	738052	212349	475699	129162	115804	175152	255659	479546	247538	33019	140692	702929	204815	33019	208107	212487	338789	470170	433387	172104	139698	263512	262452	275374
2334	1-linoleoyl-GPG (18:2)*	Lipid	Lysophospholipid	54885	LC/MS Neg	100009227	5516	507.273						151749	97570	106536	69307	141455	76045	70270	44511	211809	79525	85808	79491	114478	89313	99593	146408	67981	109256	156533	144123	94183	58225	60846	110123	89821	119488	84987	203915	106894	85182	44511	87569	113241	126908	67038	190540
2332	1-oleoyl-GPG (18:1)*	Lipid	Lysophospholipid	45968	LC/MS Neg	100005716	5610	509.288			34999689			65836	136961	195779	65836	65836	65836	65836	65836	206796	160518	202285	65836	148901	71511	136570	86099	65836	65836	241497	65836	65836	101135	65836	123660	65836	76431	65836	128302	262984	104084	84927	65836	74568	65836	65836	181110
2218	1-palmitoyl-GPA (16:0)	Lipid	Lysophospholipid	34428	LC/MS Neg	100001445	5600	409.236	17618-08-5	6419701	4925335	C04036	HMDB00327	18379	18379	27970	63014	41457	92314	18379	18379	18379	36436	18379	25194	18379	28883	18379	41549	18379	18379	41256	52561	44030	18379	34729	83653	34680	18379	45639	18379	79307	116783	126145	36250	29070	54381	34259	18379
2328	1-palmitoyl-GPG (16:0)*	Lipid	Lysophospholipid	45970	LC/MS Neg	100005717	5570	483.273		3300276	2548639			89014	112669	69966	22557	60138	22557	76722	22557	93584	46070	108769	22557	51539	31210	58607	82471	24480	65287	112416	60324	22557	22557	22557	68639	44279	84972	51495	152681	78442	47265	22557	75546	48137	52302	31028	39097
2142	1-stearoyl-2-oleoyl-GPG (18:0/18:1)	Lipid	Phosphatidylglycerol (PG)	52623	LC/MS Polar	100001866	717	775.549	322647-48-3					2457394	3047997	2799034	3047796	1731759	1876727	1093490	1351578	1839758	2350117	1684625	1368927	3525729	2969501	2161496	4542773	4309185	1868149	4820455	334614	959983	890099	1122607	1979299	2809946	1936914	1188490	303736	1212966	1454767	1389885	2568038	1890730	3871241	2054035	2080880
2122	1-stearoyl-2-oleoyl-GPS (18:0/18:1)	Lipid	Phosphatidylserine (PS)	19265	LC/MS Pos Late	100000639	3000	790.559		9547087	7826037		HMDB10163	94432	99488	179110	128327	149828	71325	67376	218013	180743	135149	251265	104731	1466811	213061	84617	478410	432051	725412	157489	120886	312878	455730	62147	541557	253876	1012512	171990	218534	43418	46749	227900	79977	152754	268352	116755	419116
1289	10-heptadecenoate (17:1n7)	Lipid	Long Chain Fatty Acid	33971	LC/MS Neg	100001278	5555	267.233	29743-97-3	5312435	4471860		HMDB60038	9838467	8553081	2566893	10272696	5785337	4358292	9924082	14607789	7682624	6939156	2310517	18232752	3010889	7246517	2381874	15561910	8928739	23504840	2498486	2820375	5646456	6632130	6825093	13835628	1936160	9857781	15594210	5877552	5268229	4942285	5905663	14865399	8954802	10818140	21951986	3121918
1301	10-nonadecenoate (19:1n9)	Lipid	Long Chain Fatty Acid	33972	LC/MS Neg	100001277	5780	295.264	73033-09-7	5312513	4471938		HMDB13622	2894788	2782104	1205937	2555884	2411540	1605552	2910111	4147167	2438215	3021486	697010	5283489	1254494	2773972	884690	4230474	2489637	5735557	1141588	1116405	1431679	2658305	1854261	5064239	861600	3887483	3713802	1827459	2711521	2226765	1988372	3213570	2489236	3099348	4467763	1387945
1276	10-undecenoate (11:1n1)	Lipid	Medium Chain Fatty Acid	32497	LC/MS Neg	100001197	5085.8	183.139	1333-28-4	14891	10771160	C13910	HMDB33724	2555784	3787355	2111076	3618549	2514275	4608412	2511755	5259769	2307373	5058612	942407	4392264	3449119	4630481	2804429	2882423	5508822	1525230	3335614	2327533	2080673	3386210	3875723	1843787	2744107	6184982	5116102	4122450	2537776	5844126	3242801	3260665	1046620	3426710	1704729	1946126
1704	12,13-DiHOME	Lipid	Fatty Acid, Dihydroxy	38395	LC/MS Neg	62	5137	313.238	263399-35-5	10236635	8412123	C14829	HMDB04705	207400	149158	64111	116080	194188	30495	183584	131812	202845	187814	30495	243659	106676	59246	424471	30495	160733	327570	30495	347388	94586	107876	30495	99998	32182	120334	85212	359845	30495	30495	30495	50265	177319	122430	30495	802910
1685	13-HODE + 9-HODE	Lipid	Fatty Acid, Monohydroxy	37752	LC/MS Neg	100002196	5275	295.228		43013				1015191	928350	626536	608612	1950689	360590	1086236	856243	1974984	682020	516233	2422989	877348	363353	1984273	540753	910448	1891243	699830	3312051	455009	533407	566398	1524933	537301	946320	758809	2742008	928159	632201	635831	390960	764550	1115113	1086272	5771819
1681	16-hydroxypalmitate	Lipid	Fatty Acid, Monohydroxy	39609	LC/MS Neg	100002953	5236.2	271.228	506-13-8	10466	10034	C18218	HMDB06294	551679	796952	399099	600708	544503	364924	548673	740701	565872	309892	559993	1668436	646472	702439	366723	498172	589747	2055478	354430	492552	363590	541606	419296	1102524	224108	700814	765866	724227	1083889	378581	619485	614028	742914	685578	938261	347016
2893	16a-hydroxy DHEA 3-sulfate	Lipid	Androgenic Steroids	38168	LC/MS Neg	100002126	4240	383.153						1422073	650533	1129856	960576	1507258	1455126	1281500	1021088	1674316	838639	855812	1604497	2451276	2716412	1309086	659132	536057	984896	520443	1209719	846217	1084832	1777538	3211404	915283	11173305	440975	972703	995551	6203568	2213470	639746	830954	1183888	1128059	563561
1709	2,4-dihydroxybutyrate	Lipid	Fatty Acid, Dihydroxy	62951	LC/MS Polar	100002285	1793	119.035	1518-62-3	192742	167259		HMDB00360	938637	339540	339540	1218059	751095	339540	1696168	1428555	1358388	339540	985115	339540	1209191	1013375	339540	1048519	1213277	1797686	1778642	339540	1271055	339540	339540	883417	666228	1283718	1738825	1263688	1925921	339540	705087	339540	339540	339540	339540	1319123
1507	2-aminoheptanoate	Lipid	Fatty Acid, Amino	43761	LC/MS Pos Early	100004542	3160	146.118	1115-90-8	227939	198338			370987	412149	514949	322759	439551	281661	506798	393017	311568	133491	413879	268266	390055	356036	396242	767092	505016	330056	343672	601570	500852	272493	294334	242864	248156	775779	430468	494852	425072	355835	268134	331321	509442	352211	142343	464138
1512	2-aminooctanoate	Lipid	Fatty Acid, Amino	43343	LC/MS Pos Late	100004227	750	160.133	644-90-6	69522	62727		HMDB00991	33415	89155	92838	62091	268402	33243	84357	128871	162627	57474	128376	95450	264389	33243	96523	215628	132534	110505	89321	276422	176966	33243	33243	33243	106995	376325	94694	122207	119136	33243	118076	33243	204936	33243	33243	69736
1655	2-hydroxyarachidate*	Lipid	Fatty Acid, Monohydroxy	61700	LC/MS Neg	100019892	5990	327.29		5225199	4395406			56487	54648	60678	22122	99048	49783	22122	27293	22122	121428	22122	47609	102777	49381	53549	44413	57013	139810	132990	167942	42543	22122	22122	146882	35850	47309	22122	22122	22122	22122	22122	69414	39540	22122	23760	78045
1656	2-hydroxybehenate	Lipid	Fatty Acid, Monohydroxy	57663	LC/MS Neg	100015637	6384	355.322		193484	167899			62302	43673	31165	71391	105476	73521	49387	62357	35055	66063	44282	39274	50816	44603	96596	39601	48113	113062	69297	87199	41022	19074	27975	157193	40496	43857	57370	73260	69003	35233	41339	49323	25073	48831	28369	58515
1649	2-hydroxydecanoate	Lipid	Fatty Acid, Monohydroxy	42489	LC/MS Neg	100004089	4840	187.134	5393-81-7	21488	20195			1198521	2355543	575597	534198	2130212	759433	1052469	1533671	2436593	673776	512936	968387	2548025	745509	1417830	547653	604101	972246	768934	1585480	795485	1033620	319951	1315976	588472	798419	441635	8601108	772739	885893	930591	330492	846405	710609	342977	2045872
1425	2-hydroxyglutarate	Lipid	Fatty Acid, Dicarboxylate	52294	LC/MS Pos Early	100002070	958	166.071	40951-21-1	43	42	C02630	HMDB0059655	375537	927338	470852	403038	283182	218297	421460	347283	560687	307741	300166	376952	650644	486353	470029	384328	423134	655603	435836	512582	337331	230930	316903	372611	283913	311372	384036	438857	437367	567456	400586	215486	325251	381009	271934	261237
1650	2-hydroxylaurate	Lipid	Fatty Acid, Monohydroxy	52916	LC/MS Neg	100008934	5211	215.165	2984-55-6	97783	88259			194375	181301	167151	176270	190165	185691	367057	209626	223109	161829	84577	278343	207225	226139	174648	151833	327606	258614	335937	425961	196503	206646	111096	215765	188583	398464	225337	224605	357229	318890	168910	80930	110950	203015	72029	171895
1658	2-hydroxynervonate*	Lipid	Fatty Acid, Monohydroxy	61698	LC/MS Neg	100015638	6345	381.337		5312783	4472208			130457	36272	105496	214978	245372	124371	31047	193860	31047	188041	31047	157727	207990	158504	101294	187397	31047	313483	93521	146557	35669	31047	75337	241442	69179	31047	150324	113180	177624	125013	161238	141440	198449	119100	113043	65690
1648	2-hydroxyoctanoate	Lipid	Fatty Acid, Monohydroxy	22036	LC/MS Neg	100000743	3736.8	159.103	617-73-2	94180	84994		HMDB02264	400857	342993	486535	230210	1176627	246169	336206	510103	597762	319610	186540	420047	1129611	264871	783252	576663	284384	293919	352938	656910	646420	245974	215602	322543	279236	858615	495940	991488	780912	349500	330771	163569	449809	447792	165050	504974
1652	2-hydroxypalmitate	Lipid	Fatty Acid, Monohydroxy	35675	LC/MS Neg	100001579	5511.2	271.228	764-67-0	92836	83805		HMDB31057	7744624	6585428	4138072	7681231	5474071	5902454	6673319	6327634	5409562	6465906	3909376	7203156	6815661	7538381	6276896	7635999	8401048	9072383	7181363	7168404	6501891	6617710	4921623	5641246	4653315	7283820	6005265	7075876	7622813	7415722	6457165	6916914	5826141	5849157	4810462	5929173
1413	2-hydroxyphytanate*	Lipid	Fatty Acid, Branched	61702	LC/MS Neg	100004414	5751	327.29	14721-68-7	189026	164249			325290	295480	463080	332814	505549	385672	517543	428435	742224	524627	444812	853167	822204	840900	426409	598705	386008	823362	490938	498564	170714	178717	215412	352311	546359	262001	650290	280510	779114	648088	524856	250899	228045	397289	47014	381132
1654	2-hydroxystearate	Lipid	Fatty Acid, Monohydroxy	17945	LC/MS Neg	1239	5695	299.259	629-22-1	69417	62625	C03045		2193228	1897112	1355533	2288539	2084469	1834451	2031925	1719715	1857506	2086172	1270388	2182807	1864402	2096913	1982350	2144325	2143765	3427263	2303995	2249162	1824999	1973927	1521311	2345015	1344431	2031853	1936656	1991004	2214149	2149971	2212821	1971634	2040921	1851871	1556016	1769781
1255	2-methylmalonylcarnitine (C4-DC)	Lipid	Fatty Acid Synthesis	35482	LC/MS Pos Early	100001596	2440	262.129	149181-64-6	53481628	21403178		HMDB13133	185105	38976	101107	112355	38976	38976	55485	154917	110798	82433	89345	150292	89898	82082	38976	105108	38976	87960	151105	138412	99974	38976	38976	38976	52750	102969	180436	38976	38976	106791	109020	108492	71196	118451	38976	64256
2821	21-hydroxypregnenolone disulfate	Lipid	Pregnenolone Steroids	46115	LC/MS Neg	100001999	3935	245.067	1164-98-3	134595	118625			330801	158969	395475	508911	320284	603398	776650	555070	390548	130779	216491	457526	1402048	594105	478493	253451	148237	1228613	477622	833140	147548	809339	512313	335043	378228	1767675	561211	1402957	601490	1324450	1008513	136851	102735	254808	590630	333449
1707	2R,3R-dihydroxybutyrate	Lipid	Fatty Acid, Dihydroxy	63109	LC/MS Polar	100002367	1543	119.035	759-06-8		17215960		HMDB00498	68757368	31774282	33681960	38410616	62510380	35775572	45497708	52408892	64306904	100036168	57094956	29645766	40497116	70018216	46976424	42472592	48277048	31785468	40889504	30365342	85056736	21788708	26207116	102231440	55514784	17431880	67206552	34379624	58928788	18487216	40210484	61156376	50269732	90958152	61888100	50758008
1706	2S,3R-dihydroxybutyrate	Lipid	Fatty Acid, Dihydroxy	62950	LC/MS Polar	100002284	1660	119.035	5057-93-2	10964471	9139682		HMDB02453	36917368	25935080	38556916	20877254	43086188	48421744	15822028	30739736	48233696	39623304	17761644	98340440	50068280	48123032	25891022	35380192	52920608	37614988	33990336	32110766	49952916	57605016	19907704	31492500	27032994	20824748	33520444	40181792	42461552	49792504	68267328	58673588	74164608	38265956	21362844	30940304
1710	3,4-dihydroxybutyrate	Lipid	Fatty Acid, Dihydroxy	62952	LC/MS Polar	100001730	2204	119.035	51267-44-8					8783151	9625069	5920004	7586711	8786632	6214108	14920113	9334141	10909378	11572208	7772735	5648306	13456212	11054767	10244235	11938188	7435588	20990430	11444264	13777099	9336844	6566787	5482601	24159880	7981396	13205444	9796404	13802173	12324201	8904227	9689956	8787533	8071353	8187588	5677742	7644336
1465	3-carboxy-4-methyl-5-pentyl-2-furanpropionate (3-CMPFP)**	Lipid	Fatty Acid, Dicarboxylate	61871	LC/MS Neg	100020004	4000	267.124		194501	168762			8916708	2487283	7338573	4841352	6231570	5732206	5925059	10286346	6972422	4496218	6265662	4675687	7013379	5824694	7804489	9795936	12160036	6502985	12048311	9218454	4369233	2909902	3170764	4579818	6923178	3918435	9076888	9567856	4961457	4719718	3745609	6597415	2842989	9258019	3266544	8190924
1463	3-carboxy-4-methyl-5-propyl-2-furanpropanoate (CMPF)	Lipid	Fatty Acid, Dicarboxylate	31787	LC/MS Neg	100001178	2800	239.092	86879-39-2	123979	110498		HMDB61112	34978680	7499828	10002412	8792969	14165708	20440884	10693725	14420299	22472224	13972958	3238244	408089	13178427	8229117	22098384	63947696	48343896	8809098	22081202	3093799	82399616	3068072	2403974	8737491	15529696	344206	17971896	5117698	17280390	9582610	3204050	2792942	8913389	39831380	4561840	16076162
2749	3-hydroxy-3-methylglutarate	Lipid	Mevalonate Metabolism	531	LC/MS Polar	112	2850	161.046	503-49-1	1662	4573695	C03761	HMDB00355	7629100	8688856	8268127	8353687	17780068	7502415	10611886	10764395	10774920	13719105	5346671	9332914	14534601	9942923	11758366	14769301	11232833	35958536	9385934	13987138	8924220	7568972	5937030	12135984	7741189	8775707	10391935	18925432	8502613	7978806	10371529	8003421	9536513	8860754	7608758	11813407
1430	3-hydroxyadipate*	Lipid	Fatty Acid, Dicarboxylate	62069	LC/MS Polar	100004396	3131	161.046		151913	133894		HMDB00345	1039616	1461148	797825	860278	1430435	978234	1497900	827455	1672123	483067	683309	2349197	1090109	1316742	1193794	1250544	975201	2010782	2588188	2638012	483067	1370190	1762784	1042568	510218	1981035	1985352	1442930	1494866	1802593	1819957	779197	483067	1209093	1680606	978572
1627	3-hydroxybutyrate (BHBA)	Lipid	Ketone Bodies	542	LC/MS Polar	254	1444	103.04	625-72-9	441	428	C01089	HMDB00357	30083688	46479912	11293036	66606568	64410536	71119824	43189764	141436256	42377336	73525248	21610492	287551616	25239068	38105456	63573324	35819568	66839284	259069328	21991656	57225172	51054540	42116596	122319904	151461872	28128700	106310912	62362132	74204784	109240264	39442200	43499420	52307216	43411808	45663096	110395728	70028576
1555	3-hydroxybutyroylglycine**	Lipid	Fatty Acid Metabolism(Acyl Glycine)	62064	LC/MS Pos Early	100020211	978	162.076						608497	250567	345094	122478	393892	474607	551175	458700	526564	556068	203661	2095453	387876	406159	535290	229382	617508	1489563	698362	2029562	146755	394248	500689	161444	224065	1384760	168819	337084	592140	781292	540119	275891	426590	614450	866620	297435
1664	3-hydroxydecanoate	Lipid	Fatty Acid, Monohydroxy	22053	LC/MS Neg	100000997	4634.7	187.134	5561-87-5	26612	24790		HMDB02203	526771	836187	481826	837427	476530	627921	469891	1441114	621134	620790	155190	2471665	489067	749596	275404	786996	632489	664261	593878	612377	366935	650723	463353	913480	162195	1332612	489437	455485	407374	999155	319011	473218	423301	744609	799685	431572
1661	3-hydroxyhexanoate	Lipid	Fatty Acid, Monohydroxy	53230	LC/MS Polar	100006367	1082	131.071	10191-24-9	151492	133518			2921817	2664554	3738848	2473582	3169378	4637016	2943791	6034708	4715765	4263629	2003357	8034760	3905299	4017326	2748032	3705300	5289969	5277176	3037130	5215722	2342252	4724072	3496222	3534098	1565369	6276141	4137355	4658051	8320856	8405918	3212435	3002386	2170992	4435931	3092531	4441768
1565	3-hydroxyhexanoylcarnitine (1)	Lipid	Fatty Acid Metabolism(Acyl Carnitine)	62557	LC/MS Pos Early	100020825	2918	276.181						527534	427510	453087	285485	290033	420238	236370	356051	450544	468117	309501	1054312	448888	518504	338990	627133	858358	458302	617275	515002	354506	440134	191860	431353	139584	598209	500860	594763	488121	584890	655439	368353	418648	315103	653510	153252
1666	3-hydroxylaurate	Lipid	Fatty Acid, Monohydroxy	32457	LC/MS Neg	100001112	5175	215.165	53941-38-1	94216	85026		HMDB00387	504010	739659	472616	775918	423956	581054	429422	1147210	636598	420863	125581	2264745	406631	620172	239771	911246	673149	944880	247193	693382	316163	484105	385196	809716	104212	1374352	413743	274464	420216	986599	302659	321844	448512	824678	637813	196426
1668	3-hydroxymyristate	Lipid	Fatty Acid, Monohydroxy	21158	LC/MS Neg	100000882	5335	243.197	3422-31-9	16064	15252			692569	820379	585194	745647	447507	646305	642624	1062899	779068	639908	415883	1676122	500199	828549	387102	1005177	733260	1491903	323567	576169	461579	685015	541370	828330	191134	1215862	417698	433251	560648	865983	179319	322966	595104	813248	643324	236826
1662	3-hydroxyoctanoate	Lipid	Fatty Acid, Monohydroxy	22001	LC/MS Neg	100000773	3446	159.103	88930-08-9	26613	24791		HMDB01954	393773	751696	325988	488234	398558	542517	412263	949217	598405	663091	142326	1419794	569670	566390	252512	403219	629410	523283	423363	571703	264460	813530	441181	795572	190561	1053737	393094	748205	382179	749435	267777	346455	224989	534709	585313	608591
1670	3-hydroxyoleate*	Lipid	Fatty Acid, Monohydroxy	61843	LC/MS Neg	100019966	5508	297.244						1834042	2725576	1095496	812707	309859	309859	309859	2771332	1925502	933395	309859	4132732	2194186	973045	788071	1032350	309859	6725557	309859	861623	1420974	2152867	1318285	1527706	309859	6485856	1247535	826367	309859	309859	309859	1083928	1552105	867924	1588023	309859
1583	3-hydroxyoleoylcarnitine	Lipid	Fatty Acid Metabolism(Acyl Carnitine)	61840	LC/MS Pos Late	100019801	1406	442.353			48061587			107115	87282	57657	90322	65619	121422	42356	168330	77171	71048	42356	189891	128813	42553	75426	122793	127440	60747	75689	76809	61514	95191	42356	111848	42356	148545	146732	122780	46383	205620	154022	69053	78799	90791	122641	98677
1665	3-hydroxysebacate	Lipid	Fatty Acid, Monohydroxy	31943	LC/MS Polar	100001145	2411	217.108	73141-46-5	3017884	2285525		HMDB00350	81178	412726	81178	125527	217287	81178	255040	245515	211836	81178	81178	1307908	175180	221978	81178	81178	81178	704085	263860	213360	81178	333544	284645	219265	81178	377886	351632	559920	783396	544408	227197	81178	81178	81178	696047	333435
1424	3-methylglutarate/2-methylglutarate	Lipid	Fatty Acid, Dicarboxylate	54676	LC/MS Polar	100010834	2832	145.051			11781		HMDB00752	397275	942291	716754	700114	1062381	1054676	699014	963986	902649	2658160	571857	1609374	422181	691074	753998	493642	1510889	1307899	562309	1187119	697378	973755	461286	534236	205044	1109115	476384	552192	1004077	335138	921031	205044	1135081	565942	434040	673768
3033	3b-hydroxy-5-cholenoic acid	Lipid	Secondary Bile Acid Metabolism	43507	LC/MS Neg	100004182	5205	373.275	5255-17-4	92997	83950		HMDB00308	16850	16850	16850	45078	24506	180461	16850	28264	52942	16850	16850	19036	22172	16850	16850	16850	38386	30061	29528	16850	44079	31288	127559	30277	47054	46614	16850	79232	89489	180028	92561	16850	16850	16850	16850	16850
2778	3beta-hydroxy-5-cholestenoate	Lipid	Sterol	54805	LC/MS Neg	100006370	5398	415.322	6561-58-6	165511		C17333		387005	360745	425299	899949	326534	935345	537013	456067	513225	364920	203491	1034277	997415	350502	362541	535445	541419	879020	597082	606404	504672	648077	259881	461842	299046	1071222	509841	612125	768023	835197	853260	259372	345161	261049	275671	420605
2788	4-cholesten-3-one	Lipid	Sterol	38125	LC/MS Pos Late	100002227	2520	385.346	601-57-0	91477	427	C00599	HMDB00921	173459	110210	96703	107974	139916	97348	121927	130609	118538	103600	108971	63995	180096	111405	79208	217475	96673	106418	155350	95548	122487	67637	40488	82692	40488	40488	267255	193371	84413	109314	97459	127385	101323	197540	82887	162761
1426	4-hydroxy-2-oxoglutaric acid	Lipid	Fatty Acid, Dicarboxylate	40062	LC/MS Polar	100002537	3073	161.009	1187-99-1	599	579	C01127	HMDB02070	7793757	8177878	5905301	6867529	10506976	3533113	4056694	5006408	13048934	12717779	6838275	6589070	22299132	7620687	10780888	11590787	14367748	7149937	14628924	15478179	2373237	8212448	5663962	9042390	5833469	12020392	8799004	8014032	10312760	12207741	9888418	11105263	7702905	6140521	6972474	9920014
1278	5-dodecenoate (12:1n7)	Lipid	Medium Chain Fatty Acid	33968	LC/MS Neg	100001232	5224	197.155	2430-94-6	5312378	4471803		HMDB00529	2542852	2588149	1721664	4467134	1376293	3557644	4526077	4749536	2743327	1677793	1387510	16724830	1775590	3165872	1372075	3349069	3524048	9508585	1058845	1497120	1225499	2157494	3507906	3924863	683657	4209148	2171661	1410048	2021875	4562582	2020580	3318014	3494276	6148842	5631938	909608
1573	5-dodecenoylcarnitine (C12:1)	Lipid	Fatty Acid Metabolism(Acyl Carnitine)	61769	LC/MS Pos Late	100016069	1135	342.264					HMDB13326	3532049	1905557	2124173	3668137	2781692	6613018	1737384	4229217	2957182	2909869	960729	10626543	3822791	3853738	1426909	2374986	3535821	4218171	2232208	1840701	1530214	4895743	2582150	2247547	749650	6140009	2814349	2123914	1209130	6943609	2997478	4541182	1995445	6855865	4400985	639027
1674	5-hydroxyhexanoate	Lipid	Fatty Acid, Monohydroxy	31938	LC/MS Neg	100001148	1267	131.071	44843-89-2	170748	149280		HMDB00525	1051893	783543	611301	605515	485363	585076	955036	828307	688779	557903	584048	725324	527006	737271	663070	677972	622842	967688	682842	866004	601929	741349	541399	618027	599179	610100	387899	391801	546214	651254	568245	519204	574147	633054	380557	667339
2908	5alpha-androstan-3alpha,17alpha-diol monosulfate	Lipid	Androgenic Steroids	37183	LC/MS Neg	100002008	5208	371.19						65245	24281	43587	34346	24281	123423	85342	62705	79670	24281	34383	93046	117696	24281	61027	34259	24281	51802	62813	108323	192824	24281	84624	24281	89849	24281	36739	68867	24281	24281	151798	52493	31876	24281	24786	145385
2927	5alpha-androstan-3alpha,17beta-diol monosulfate (1)	Lipid	Androgenic Steroids	37186	LC/MS Neg	100002018	4925	371.19						291789	64451	194731	62332	89481	326652	317835	297167	353470	29117	107483	450101	788440	61621	244730	67460	55183	445861	123293	282519	345178	216645	222403	24025	125123	24025	128356	246435	139355	56903	607882	299010	159255	170401	132008	410198
2938	5alpha-androstan-3beta,17alpha-diol disulfate	Lipid	Androgenic Steroids	37187	LC/MS Neg	100002021	4215	225.07						315632	25312	36114	128636	25312	289993	131200	643592	198559	28944	77782	98241	75921	25312	71667	130785	25312	140958	124381	304836	247192	25312	120118	25312	214966	25312	25312	25785	344998	90323	129213	46867	28629	31890	34946	96859
2935	5alpha-androstan-3beta,17beta-diol disulfate	Lipid	Androgenic Steroids	37190	LC/MS Neg	100001987	3880	225.07	571-20-0	242332		C12525	HMDB00493	2099804	483960	917600	356374	892510	1974340	2436726	2977062	1356333	531228	687381	1393085	3956840	644560	2812619	504562	135946	8541876	559067	1546757	1532238	373774	820702	147939	742388	319577	480284	650559	2260546	1985446	4489202	913518	624314	539173	2196941	2222496
2933	5alpha-androstan-3beta,17beta-diol monosulfate (1)	Lipid	Androgenic Steroids	37191	LC/MS Neg	100002023	4635	371.19						228475	19909	78652	19909	44557	152278	89120	235665	213751	19909	29444	164649	295878	19909	76358	19909	19909	361246	40598	154172	81596	51661	87509	19909	35248	19909	22752	77064	124000	36444	289275	52898	49537	35265	23776	127573
2848	5alpha-pregnan-3beta,20alpha-diol disulfate	Lipid	Progestin Steroids	37198	LC/MS Neg	100001988	3962	239.085						417754	180070	464247	474610	247710	904491	893472	714774	334924	255705	532084	484955	697450	796714	7210526	193449	776262	752110	583353	1092117	45429496	1049253	1068251	459841	3451642	7297838	390408	4250846	2664353	16517701	1699440	359250	246718	372234	145435	430539
2842	5alpha-pregnan-3beta,20alpha-diol monosulfate (2)	Lipid	Progestin Steroids	37200	LC/MS Neg	100002014	5060	399.221						192281	65116	270249	311833	69518	512537	234264	470000	254145	87273	120600	315350	265672	253363	1960616	76350	435337	393959	223874	698549	27657012	429325	448457	141435	1185942	3143124	126074	2235804	807851	6320030	630029	137594	164070	228523	41781	158167
2839	5alpha-pregnan-3beta,20beta-diol monosulfate (1)	Lipid	Progestin Steroids	37196	LC/MS Neg	100002009	5180	399.221						77921	17094	152729	134713	44471	292247	176604	170847	83580	113866	50584	309286	201232	242600	2409081	61750	230529	257739	145884	384815	22349424	500322	285700	117028	628841	2211011	193821	1320372	335782	2720592	353048	139871	83504	313073	88585	126723
2849	5alpha-pregnan-diol disulfate	Lipid	Progestin Steroids	46172	LC/MS Neg	100002015	4310	239.085		5127902	4302261			21419	21419	26570	21419	21419	21419	31508	21419	21419	21419	21419	67421	41918	42765	1607994	21419	21419	72698	21419	75626	7644429	160959	76005	59554	261222	641184	95797	322591	95048	896216	75972	21419	21419	52573	21419	21419
2775	7-alpha-hydroxy-3-oxo-4-cholestenoate (7-Hoca)	Lipid	Sterol	36776	LC/MS Neg	100001609	5288.1	429.301	115538-85-7	3081085	2338765	C17337	HMDB12458	1102319	3135702	1150585	1610076	1210080	1072459	1575292	1436434	1479161	769338	886065	1455039	1540750	1471010	1189450	2168752	1473624	1475140	1357249	1136955	1075223	1278694	658985	1319252	804933	2190028	1896619	1591762	887590	1190509	1050238	1187617	1312658	1986321	967491	1535937
2766	7-dehydrocholesterol	Lipid	Sterol	1099	LC/MS Pos Late	264	2467	367.336	434-16-2	439423	388534	C01164	HMDB00032	62430	64775	22361	22361	22361	22361	22361	54536	127360	22361	22361	22361	22361	62325	22361	92201	22361	95913	101595	22361	336050	22361	22361	77424	22361	22361	1168163	22361	47037	123989	22361	161672	55325	22361	22361	149344
3031	7-ketodeoxycholate	Lipid	Secondary Bile Acid Metabolism	31904	LC/MS Neg	100001063	4821	405.265	911-40-0	188292	163659		HMDB00391	61573	5990150	61573	61573	61573	61573	61573	61573	61573	61573	61573	61573	61573	61573	61573	61573	61573	61573	61573	61573	61573	61573	61573	61573	61573	61573	61573	61573	61573	61573	61573	61573	61573	128301	61573	61573
1705	9,10-DiHOME	Lipid	Fatty Acid, Dihydroxy	38399	LC/MS Neg	179	5180	313.238	263399-34-4	9966640	8142232	C14828	HMDB04704	48816	156746	40707	106929	541007	40707	127829	142053	271743	160494	40707	223405	309320	62459	170479	40707	128676	155343	40707	192654	74481	59009	40707	201840	94541	106510	77223	586870	40707	40707	40707	57280	187561	119149	66262	433021
1699	9-hydroxystearate	Lipid	Fatty Acid, Monohydroxy	47120	LC/MS Neg	100005834	5384	299.259	25498-28-6	9570127	7844595		HMDB61661	659251	150572	234005	569033	423015	381772	1204172	847123	724562	555105	355764	1787524	527629	601712	327243	501384	498416	2053029	404806	474751	296558	507964	271639	658358	266515	490178	564853	150572	665057	483912	702304	370591	613331	505346	1099419	576656
1559	acetylcarnitine (C2)	Lipid	Fatty Acid Metabolism(Acyl Carnitine)	32198	LC/MS Pos Early	100000802	2282	204.123	5080-50-2	1	5406074	C02571	HMDB00201	197567760	179457136	171456160	189646832	174838960	249687680	196468240	304572160	204455536	152403520	85860384	384049632	288076224	176767056	140085008	244955280	189744800	303356512	143149680	108411256	161881200	132017456	215214368	172017920	110799272	195273136	202322432	240328784	172750752	170639040	188104272	160724096	181969504	175726368	149747328	196894304
1427	adipate (C6-DC)	Lipid	Fatty Acid, Dicarboxylate	21134	LC/MS Polar	100000863	3000	145.051	124-04-9	196	191	C06104	HMDB00448	2191235	964477	669191	826765	622080	635434	687167	809071	551298	495813	444121	1172583	653168	697218	354102	596189	841625	2077352	589514	1035141	287767	888415	465686	468872	287767	453327	714888	635472	894820	425831	577958	640368	943597	821015	676580	287767
1587	adipoylcarnitine (C6-DC)	Lipid	Fatty Acid Metabolism(Acyl Carnitine)	52988	LC/MS Pos Early	100006614	2570	290.16		71296139	28540385		HMDB61677	265420	274406	330876	292380	410909	386886	470977	208743	916491	220168	335237	585641	495277	312672	274209	423195	427651	512191	624722	499412	161792	1245102	459475	363485	297896	435020	926084	824768	543836	580212	1249587	659288	487597	486081	342566	272069
1340	adrenate (22:4n6)	Lipid	Polyunsaturated Fatty Acid (n3 and n6)	32980	LC/MS Neg	100001193	5678	331.264	2091-25-0	5497181	4445971	C16527	HMDB02226	1631481	2817894	752859	2522826	1639572	3778377	2770253	6706181	752859	5094646	752859	7039027	752859	3998201	752859	5430624	752859	7866675	752859	752859	752859	2003961	752859	3914265	752859	752859	3166877	752859	3506151	752859	2030809	2860593	3561513	2507995	7820205	1227660
1599	adrenoylcarnitine (C22:4)*	Lipid	Fatty Acid Metabolism(Acyl Carnitine)	57528	LC/MS Pos Late	100015850	1415	476.373						95116	140443	102080	123972	81165	51068	77573	90313	40946	41834	40946	54599	145192	62152	165270	92007	40946	147582	40946	40946	59870	74810	40946	70155	67057	194830	135443	40946	40946	53914	40946	40946	69416	40946	50010	40946
2942	andro steroid monosulfate C19H28O6S (1)*	Lipid	Androgenic Steroids	32827	LC/MS Neg	100002152	3871	383.153				C04555	HMDB02759	112710	12600	38981	54292	171181	83601	65149	12600	188300	12600	12600	123935	236182	159450	76830	12600	12600	120920	12600	134856	27369	43071	96676	122446	53406	537318	112035	26130	61408	385211	149182	12600	12600	26649	80539	16678
2917	androstenediol (3alpha, 17alpha) monosulfate (2)	Lipid	Androgenic Steroids	37207	LC/MS Neg	100002026	4712	369.174						69539	33419	117684	186502	69110	228952	122555	262193	33419	33419	87286	104653	435067	231951	115382	58145	61697	114631	78176	373224	33419	238492	255848	46445	51486	301565	60147	276707	112205	374988	261008	74908	38648	92844	114644	48800
2918	androstenediol (3alpha, 17alpha) monosulfate (3)	Lipid	Androgenic Steroids	37209	LC/MS Neg	100002027	5180	369.174						714969	156112	757179	621497	510084	1401290	1245315	862043	644254	324049	432536	893862	2434520	638350	1674540	633187	350633	918281	642153	1023283	195319	1772293	796020	178713	585250	801587	577196	2212647	691661	966790	2142721	733406	468242	430126	567214	884455
2913	androstenediol (3beta,17beta) disulfate (1)	Lipid	Androgenic Steroids	37202	LC/MS Neg	100001992	3740	224.062		87120982		C04295	HMDB03818	28139120	4472933	9112589	6314409	18995840	14030362	14035602	16550896	9629872	6419380	4890871	14748395	42883408	10141332	24789004	5073112	3403290	99490368	7128543	10870513	18511284	9754653	5694102	3705784	6646768	17378514	9774125	14680734	16202237	21881608	36165356	7771180	3707694	6346169	41246824	14453507
2914	androstenediol (3beta,17beta) disulfate (2)	Lipid	Androgenic Steroids	37203	LC/MS Neg	100001994	4065	224.062		87120982		C04295	HMDB03818	2772515	947016	1798462	2172618	2435025	4566142	3412611	3022722	1709788	1737078	1695157	3777985	5511343	4194363	2644236	1240973	714327	5130934	2503647	5537730	1367247	2583825	2930042	2657857	2225401	5640385	2858943	5015737	2619833	4724825	4533508	1112212	773958	1539590	3145664	2156429
2910	androstenediol (3beta,17beta) monosulfate (1)	Lipid	Androgenic Steroids	37211	LC/MS Neg	100002028	4535	369.174	521-17-5	13847309			HMDB03818	3218846	292720	1097071	779621	1511705	1730203	875513	2011694	4074873	440175	445207	2111794	4886640	977248	1263341	331268	397358	5354332	685053	1390364	1118988	2396072	1034387	361552	661152	1312470	1058110	3205700	1252220	1393612	3145488	704704	434468	866581	1279397	1524405
2911	androstenediol (3beta,17beta) monosulfate (2)	Lipid	Androgenic Steroids	37210	LC/MS Neg	100002029	4500	369.174						475672	130490	227064	173709	257123	462916	289274	337388	254884	233384	175793	548806	656488	431235	547431	72487	98886	1834494	200546	369914	194318	146072	311441	78271	341058	292261	220627	278808	369350	528622	770018	190332	123708	168860	642058	314052
2894	androsterone glucuronide	Lipid	Androgenic Steroids	61846	LC/MS Neg	100002761	4953	465.249	1852-43-3	114833	102793	C11135	HMDB02829	674095	69348	988749	275953	192893	399585	407851	1496469	3804315	180210	139310	540940	913345	537862	498173	71072	175339	413178	195052	1300744	343164	248012	498419	251262	198870	260219	298541	627066	380592	777434	708046	344364	107756	314636	240050	266934
2904	androsterone sulfate	Lipid	Androgenic Steroids	31591	LC/MS Neg	100001073	5022	369.174	2479-86-9	159663	19988780		HMDB02759	12609024	3235088	10335225	4414247	2961066	19194452	19735064	11868992	21800092	4414393	6200658	15624175	35347328	2823307	17101820	4415179	3233618	12357594	7690152	18682240	18256488	7369460	10195274	862082	10772418	3155690	5119365	11211793	8533633	5387589	29845812	8189359	6495888	6154020	6949862	15575579
1304	arachidate (20:0)	Lipid	Long Chain Fatty Acid	1118	LC/MS Neg	893	6240	311.296	506-30-9	10467	10035	C06425	HMDB02212	8277530	8424223	5782879	6184680	14038558	6143224	7672920	6914531	5989897	7897849	4709141	8722076	6660895	6270339	7636168	7023938	8066770	9133162	6918659	7994594	5757110	5884914	4467428	11192461	5405110	7683878	6169765	8969757	6499850	5948924	6786050	6640563	7988703	6702423	6893194	10016330
1339	arachidonate (20:4n6)	Lipid	Polyunsaturated Fatty Acid (n3 and n6)	1110	LC/MS Neg	229	5535	303.233	506-32-1	444899	392692	C00219	HMDB01043	15804634	21477354	10786386	21954788	10346072	23842046	15464383	40883588	19290540	23276620	10780543	25657046	13337149	21260496	18454928	46951672	24244196	41095728	22258136	14954026	28635636	18640648	8558743	22488276	7179796	14474289	20084432	19773092	11127638	15026738	18799104	18931860	24434980	17674528	43444900	11858013
1598	arachidonoylcarnitine (C20:4)	Lipid	Fatty Acid Metabolism(Acyl Carnitine)	57518	LC/MS Pos Late	100015837	1353	448.342						777629	1142425	535639	682866	490561	380725	455325	679526	257009	328919	232436	338710	948403	386436	1179655	767036	293985	746057	282349	443634	560301	394522	177175	394770	324088	1082531	901086	285287	139243	377080	350819	269183	539029	376637	365725	455944
1640	arachidonoylcholine	Lipid	Fatty Acid Metabolism (Acyl Choline)	53261	LC/MS Pos Late	100009332	1390	390.337						435425	487142	52838	369317	44643	44643	253270	65572	165693	940379	636089	44643	569349	705535	1337487	717603	770491	769915	1899080	597787	384236	44643	44643	1344361	231045	238119	428621	254258	99208	188796	44643	325850	282860	150247	78044	349311
1597	arachidoylcarnitine (C20)*	Lipid	Fatty Acid Metabolism(Acyl Carnitine)	57513	LC/MS Pos Late	100015833	1512	456.405			28639199		HMDB06460	51817	51817	51817	51817	150890	139157	123158	51817	241506	51817	236704	74359	51817	51817	285579	51817	51817	120791	192867	187198	157166	51817	51817	152013	178997	51817	213590	360132	89630	126681	127577	85522	181323	130707	51817	214436
1440	azelate (C9-DC)	Lipid	Fatty Acid, Dicarboxylate	18362	LC/MS Neg	2029	1276	187.098	123-99-9	2266	2179	C08261	HMDB00784	113750	97070	137544	60310	140767	60310	128893	128849	198037	135827	66056	60310	124185	60310	333313	86745	184736	175225	190549	280374	132602	222440	60310	101076	104661	60310	60310	588978	136934	118219	110224	121680	177358	128506	111445	349702
1600	behenoylcarnitine (C22)*	Lipid	Fatty Acid Metabolism(Acyl Carnitine)	57514	LC/MS Pos Late	100015832	1561	484.436			28639204			59923	40465	79405	154332	124882	40465	46968	91184	102105	51772	54428	40465	100462	56883	331530	73864	93431	43301	87529	147255	40465	40465	40465	88877	75967	40465	102854	113136	40465	40465	40465	40465	102459	62559	40465	78461
2789	beta-sitosterol	Lipid	Sterol	27414	LC/MS Pos Late	100001033	3054	397.383	83-46-5	222284	192962	C01753	HMDB00852	40299	26130	26130	149872	26130	76667	154917	93388	52584	74781	157297	129329	220790	61898	144941	55150	257179	166369	142803	209811	62256	26130	26130	254666	180573	149281	126946	263664	126128	77088	91486	26130	38606	219746	26130	206612
1450	branched chain 14:0 dicarboxylic acid**	Lipid	Fatty Acid, Dicarboxylate	63191	LC/MS Neg	100021374	3849	257.176						722769	182156	458219	224198	408324	421953	121446	1517175	165410	576772	110883	208157	286599	66004	641362	586246	1039976	130548	227698	660125	120866	599264	155957	431506	738463	265094	301661	75742	1021107	335784	1048284	642239	317200	66004	66004	179821
1523	butyrylcarnitine (C4)	Lipid	Fatty Acid Metabolism (also BCAA Metabolism)	32412	LC/MS Pos Early	100001054	2860	232.154	25576-40-3	439829	184820	C02862	HMDB02013	4716138	2260475	4207003	3991591	4229063	2830432	3434812	3137980	3491199	2030107	2855904	2985470	3809462	3126846	1548870	6342633	2695220	2863460	2108285	1659846	2451804	2414525	2569144	3217870	2566292	2210322	3514941	2472267	2708292	3317889	4239576	4765671	3547767	4566865	2535565	2967292
2792	campesterol	Lipid	Sterol	33997	LC/MS Pos Late	100001269	2873	383.367	474-62-4	173183	151215	C01789	HMDB02869	84757	75698	50287	224451	46539	188842	220371	218973	233564	156220	218201	202016	307462	135715	174643	76777	349491	385354	233366	266938	168489	60912	46539	305645	301665	219131	190163	503044	211858	171205	188630	73800	46539	358070	46539	229374
1273	caprate (10:0)	Lipid	Medium Chain Fatty Acid	1642	LC/MS Neg	888	5090.7	171.139	334-48-5	2969	2863	C01571	HMDB00511	9014691	22136312	11308017	13723589	5115050	8564530	17781748	12753843	13332071	12827116	9154037	27299726	8089867	12912922	6741183	7549490	20852604	221747824	11899896	3654253	3894741	4648364	6660742	32233100	6971075	8658015	10334662	4228321	50824364	7999675	6168684	7866189	11043649	10487237	7854871	11017776
1269	caproate (6:0)	Lipid	Medium Chain Fatty Acid	32489	LC/MS Neg	926	2713.7	115.076	142-62-1	8892	8552	C01585	HMDB00535	3673519	2896698	2808777	2911359	2118333	2198011	2873596	3684050	3653083	3059142	4535252	5465520	3177087	3219672	2434978	2767492	2773999	3139127	2758121	3121376	1937287	2511023	2057741	3291143	1776662	2644999	2061584	2436915	3081245	3583244	4660384	2390615	2190410	3166312	2679500	2472253
1271	caprylate (8:0)	Lipid	Medium Chain Fatty Acid	32492	LC/MS Neg	932	4362	143.108	124-07-2	379	370	C06423	HMDB00482	4982220	5593285	6556808	5513539	3574418	5531588	8570789	6139577	6967127	7083309	3902627	8586436	6602651	5839395	4858488	3857756	27330696	176687632	9006647	3575681	2532723	3393559	3532658	14446096	3728205	4398471	4384763	2334198	19064150	4551511	3263743	4740056	6687510	5253257	3407966	8480550
1622	carnitine	Lipid	Carnitine Metabolism	15500	LC/MS Pos Early	100000007	1978	162.112	461-05-2	10917	10455	C00318	HMDB00062	650740672	579790656	626859456	662354816	639068736	660501184	585628480	616405184	748583360	484387808	543300736	587652800	692315648	635492032	668191872	659966400	556672832	642322432	641352448	379751136	608779136	461431520	501910080	517734176	678455296	357615104	676731008	696689280	590432064	527598592	662362496	596293568	574209984	527565984	379095776	661250816
1614	cerotoylcarnitine (C26)*	Lipid	Fatty Acid Metabolism(Acyl Carnitine)	57516	LC/MS Pos Late	100015835	1649	540.499			35015992		HMDB06347	801277	579653	716774	712759	664995	374996	327026	796567	895896	656685	729789	340301	929597	367199	1044057	886170	900594	581507	504397	761956	550752	253893	462092	650178	680053	758868	972587	1014607	630527	544319	495819	391575	806907	428127	275115	620174
2970	chenodeoxycholate	Lipid	Primary Bile Acid Metabolism	1563	LC/MS Neg	1123	5264	391.285	474-24-9;474-25-9	10133		C02528	HMDB00518	1388211	37059124	3754738	636771	1512578	792531	5045811	981925	1497685	761893	1298894	1375552	3328197	1669809	735966	412646	2244295	3858603	1336399	2528518	825985	1069074	511968	1514608	1083137	3227766	1059184	891772	1691222	853793	1004081	611422	1848970	9189563	725740	1826452
2967	cholate	Lipid	Primary Bile Acid Metabolism	22842	LC/MS Neg	136	5165	407.28	81-25-4	221493		C00695	HMDB00619	2184717	52935844	609293	54384	922711	230837	1757599	96923	444184	335767	365830	117052	2191477	235861	211385	54384	1040338	791134	105608	490200	93235	283264	263675	485172	447139	693113	165458	54384	131080	85012	81184	320939	2150069	1363914	719193	400919
2764	cholesterol	Lipid	Sterol	63	LC/MS Pos Late	266	2707	369.352	57-88-5	11025495	4937803	C00187	HMDB00067	185224448	118739752	130130280	188456544	139800064	94933024	119624304	181361536	191449520	170261136	154960000	111105544	216670960	124567672	126361408	195395200	137871728	200906944	238953936	142549552	130937544	68908016	73554232	183790608	146812672	123211552	236294880	238049552	152082592	128521808	159004688	179054064	156802112	148333488	88990704	173164064
1869	choline	Lipid	Phospholipid Metabolism	15506	LC/MS Pos Early	1256	1961	104.107	67-48-1	305	149278	C00114	HMDB00097	224447856	188957360	247085184	158331392	191172544	241812576	206145328	209074608	173541392	323018112	145988544	175173312	300339424	219200832	204089440	209148112	226473264	220698832	201649648	263955264	254217344	229147984	139327168	158226416	158184496	264979760	245253312	239187984	167766432	210225696	242463936	187527312	223045888	255156240	222376992	224025056
1870	choline phosphate	Lipid	Phospholipid Metabolism	34396	LC/MS Pos Early	267	700	184.073	72556-74-2	1014	119298	C00588	HMDB01565	1142741	1924360	1109961	1100403	975750	1054754	1280588	1395707	1054527	2110277	827220	1021649	2047013	857023	985876	1828243	1083409	1811856	1141378	1028229	1309913	1321206	665671	826015	722475	1678502	1187882	1453036	777849	1205642	1165292	849801	928181	786363	692012	1272265
1274	cis-4-decenoate (10:1n6)*	Lipid	Medium Chain Fatty Acid	62873	LC/MS Neg	100002796	4890	169.123	505-90-8	5312351	4471776			2546848	1906992	1471055	5750430	2069092	1640122	940838	7496240	4429267	2868957	380594	7344779	1202160	3400622	1222723	3269174	3863746	841753	1135408	856188	1249229	2293640	1989764	2826791	361640	5307019	2008735	748351	361640	5262092	529791	1651750	1816035	6838557	2540010	937441
1574	cis-4-decenoylcarnitine (C10:1)	Lipid	Fatty Acid Metabolism(Acyl Carnitine)	38178	LC/MS Pos Late	100002259	1057	314.233	98930-66-6		28639171			7845834	4973288	6282681	10234159	8943542	9014972	3117885	14129255	16755389	7086600	1985424	17463176	9018840	9744641	5399595	7542315	17976564	4952939	4685539	5848297	7085252	9319860	5553798	8443814	3033174	11320785	7530174	5422934	2763591	13223713	6646744	5175378	6861297	26417668	6361211	4731268
2865	corticosterone	Lipid	Corticosteroids	5983	LC/MS Neg	272	5040	345.207	50-22-6	5753	5550	C02140	HMDB01547	22270	22270	22270	146575	22270	39104	29522	121696	53456	26627	22270	22270	87499	22270	48127	130390	90900	79862	36393	94546	73422	62724	22270	22270	22270	95130	22270	91006	22270	154199	28954	32390	22270	71599	128842	22270
2871	cortisol	Lipid	Corticosteroids	1712	LC/MS Neg	356	4710	361.202	50-23-7	5754		C00735	HMDB00063	427394	312364	472978	715859	396095	599013	553365	958703	714559	1017001	327755	344531	1072534	513511	604429	813038	735183	764235	356315	962666	531957	865111	233858	838095	307348	647937	426904	739820	513340	943655	586015	406474	295551	643003	780366	334321
2873	cortisone	Lipid	Corticosteroids	1769	LC/MS Neg	273	4575	359.186	53-06-5	222786	361685	C00762	HMDB02802	108373	80925	203676	118471	133745	208538	186347	199971	183520	186430	141164	150551	237272	127976	155282	173113	174860	199197	110742	148715	130577	183403	64166	175445	81633	205922	135003	237213	156277	191748	181546	119181	105205	158184	85963	73567
2879	cortolone glucuronide (1)	Lipid	Corticosteroids	57699	LC/MS Neg	100015971	4600	541.265						191491	71739	137867	90161	189942	93301	112602	111216	91197	33748	118888	178547	109293	118424	91864	147705	60835	105221	132101	95970	137278	72078	57994	33748	44524	102799	217375	136855	127623	98414	154487	33748	62522	212035	115574	112985
1571	decanoylcarnitine (C10)	Lipid	Fatty Acid Metabolism(Acyl Carnitine)	33941	LC/MS Pos Late	100001251	1130	316.248	1492-27-9	10245190	8420677		HMDB00651	2920961	2514993	3241645	5110409	1615732	6491238	1475211	3310205	4369125	2175079	478533	7335344	2107164	3364721	1276260	3200750	5609219	2532530	1051973	1737409	1120339	4318302	2254641	2979522	364221	4560146	1748913	2235527	1304417	6038764	2277686	1455670	1921504	8682691	2189285	930825
2892	dehydroepiandrosterone sulfate (DHEA-S)	Lipid	Androgenic Steroids	32425	LC/MS Neg	100000792	4745	367.158	651-48-9	12594	12074	C04555	HMDB01032	37558596	5872275	20980902	19935748	16352493	39164592	21753980	31030474	66852928	14925246	9895812	30813780	82475640	15060308	33289646	6851839	8791170	48832764	17955462	39718048	29961852	33293516	18532746	14528677	20351640	35554112	17606136	47356400	20949720	40176108	54118424	10164269	8006003	14120111	18462444	22637018
1621	deoxycarnitine	Lipid	Carnitine Metabolism	36747	LC/MS Pos Early	100001662	2052	146.118	6249-56-5	134	705	C01181	HMDB01161	29747960	23767316	28914652	27525748	18796380	31468176	29302920	23492874	39093760	15832466	19900406	29488730	32205000	31445452	30753600	24896352	27310224	25224032	28824760	14421199	28158616	18766844	16777940	20582404	25201880	19337706	25574936	32364328	24279508	24905072	25194422	17266080	18121612	24566844	16206314	19887552
2988	deoxycholate	Lipid	Secondary Bile Acid Metabolism	1114	LC/MS Neg	302	5294	391.285	83-44-3	222528	389318	C04483	HMDB00626	4580731	66211408	5436173	2435595	3056361	6024631	5733493	2971688	13990623	1261617	4286390	3574387	3365753	4766900	1886682	2615904	3276753	6433588	3842429	5866229	3978621	2107674	3240478	1987746	4241119	2457337	5021676	3545290	11258576	2582324	4015496	1364620	7520067	924143	2833755	3565965
1343	dihomo-linoleate (20:2n6)	Lipid	Polyunsaturated Fatty Acid (n3 and n6)	17805	LC/MS Neg	1231	5730	307.264	2091-39-6	6439848	4944228	C16525	HMDB05060	8123048	5185963	3352120	6705047	6523643	5448342	6779572	14022727	4783673	8477408	1972454	20895636	3802000	8753178	4416803	10887853	7524847	16547977	3484473	4742064	5741796	7685726	3927856	24232048	2581327	14310444	7543173	4707995	3827793	5398156	7446815	7263332	10222697	9682673	16558991	3234477
1338	dihomo-linolenate (20:3n3 or n6)	Lipid	Polyunsaturated Fatty Acid (n3 and n6)	35718	LC/MS Neg	100001739	5596	305.249	17046-59-2	5280581	4471954	C03242	HMDB02925	6116497	5789556	3318557	6232652	4302777	4572523	4513153	12732279	4856156	7646675	2575458	13193090	3066541	6980021	4760103	13336110	6258788	12653214	5286042	3465376	5977281	3481375	2006602	14588909	1925954	5637545	8508037	4367214	3375633	4267541	5490990	8686628	8653688	8583288	12869607	2979274
1635	dihomo-linolenoyl-choline	Lipid	Fatty Acid Metabolism (Acyl Choline)	53262	LC/MS Pos Late	100009335	1424	392.352						146371	95975	42294	103860	42294	42294	57067	42294	42294	211842	130301	42294	92162	171895	263366	184127	150850	210040	430408	105285	113673	42294	42294	819392	52462	42294	129555	42294	42294	42294	42294	149011	76498	60335	42294	42294
1602	dihomo-linolenoylcarnitine (C20:3n3 or 6)*	Lipid	Fatty Acid Metabolism(Acyl Carnitine)	57521	LC/MS Pos Late	100015840	1392	450.358						644420	734782	480509	484499	522408	253902	300321	411769	220845	261662	169097	443884	685136	322185	745785	500615	240166	538975	213325	341195	423063	258976	110077	493322	308954	890018	781383	226793	105346	262999	401472	275411	454250	477786	244085	300164
1603	dihomo-linoleoylcarnitine (C20:2)*	Lipid	Fatty Acid Metabolism(Acyl Carnitine)	57520	LC/MS Pos Late	100015839	1436	452.373						322246	248168	176548	248175	230463	173117	144227	224022	119391	125846	63040	246617	362586	217476	488460	235714	155491	337137	163831	260290	216715	192325	103503	495285	223135	565461	312598	188251	70544	240794	291310	95776	182099	225448	145332	178609
1342	docosadienoate (22:2n6)	Lipid	Polyunsaturated Fatty Acid (n3 and n6)	32415	LC/MS Neg	100001182	6034	335.296	7370-49-2	5282807	4445934	C16533	HMDB61714	595096	293562	223678	312468	398351	353595	246599	488652	204776	702807	123936	845664	387621	713276	225435	471264	304971	740096	193299	321391	272248	395824	239825	925046	155395	585677	490395	274062	320813	367215	374069	426767	509076	409028	502819	143325
1462	docosadioate (C22-DC)	Lipid	Fatty Acid, Dicarboxylate	39837	LC/MS Neg	100002952	5291.8	369.301	505-56-6	244872	214170	C19625		107347	73390	43806	49747	194349	49907	249221	158990	140827	94199	160485	82645	340683	82619	98375	313430	122615	78601	183408	175689	82221	43806	54605	83792	79309	272645	70245	224178	163535	171430	108176	86577	228047	84904	64880	136335
1329	docosahexaenoate (DHA; 22:6n3)	Lipid	Polyunsaturated Fatty Acid (n3 and n6)	44675	LC/MS Neg	100000665	5525	327.233	6217-54-5	445580	393183	C06429	HMDB02183	19261292	13915763	8131756	16381679	8489723	11214790	10600905	18873896	14058761	20971360	4064661	14966042	12300291	18039064	11805353	40968704	35130944	18612688	13212839	6761181	13908301	6629855	4475173	21315346	4942647	18951596	11139721	5436436	9766042	12570140	7999459	11365240	23121612	26730980	18381914	7564999
1609	docosahexaenoylcarnitine (C22:6)*	Lipid	Fatty Acid Metabolism(Acyl Carnitine)	57523	LC/MS Pos Late	100015845	1349	472.342						212486	146757	86902	131215	98650	164490	73634	126027	70557	182601	60748	60748	246946	141200	378725	221997	290381	62490	93166	60748	250180	79787	60748	143339	72936	204076	151060	60748	60748	122228	114321	73757	117742	229327	64431	66709
1639	docosahexaenoylcholine	Lipid	Fatty Acid Metabolism (Acyl Choline)	53263	LC/MS Pos Late	100009333	1378	414.337						295421	124578	72702	127668	72702	72702	86766	72702	72702	331382	159588	72702	211534	262499	472201	363501	693326	72702	750165	119170	214332	72702	72702	713658	127387	136810	133675	72702	72702	78933	72702	131123	79100	106857	72702	72702
1328	docosapentaenoate (n3 DPA; 22:5n3)	Lipid	Polyunsaturated Fatty Acid (n3 and n6)	32504	LC/MS Neg	100001181	5571	329.249	2234-74-4	6441454		C16513	HMDB06528	3518414	2850689	1672914	3395793	2049217	2652518	3000970	7833897	3596304	2857723	1251843	4919943	2173972	4085712	1640326	11003601	5293692	7828435	2651927	2175045	4712492	1958722	1414434	4270386	733319	2698688	4546755	1864929	2578393	2176097	1983575	3162364	5007906	4881993	9362948	1700085
1341	docosapentaenoate (n6 DPA; 22:5n6)	Lipid	Polyunsaturated Fatty Acid (n3 and n6)	37478	LC/MS Neg	100001580	5624.5	329.249	25182-74-5	6441454	4945614	C16513	HMDB01976	1575933	2117953	1055334	2204431	1210996	1252484	1341576	2921563	1545069	6228634	612133	4439908	1163824	2954178	1374413	3048514	1582398	4264782	1245557	965551	702536	1593018	711592	3351039	680066	3582225	1528708	1403297	804472	1228553	1341636	2123864	2105190	1660823	5117609	1349885
1608	docosapentaenoylcarnitine (C22:5n3)*	Lipid	Fatty Acid Metabolism(Acyl Carnitine)	57529	LC/MS Pos Late	100015851	1387	474.358						162018	149659	109127	112487	83451	35921	59436	92302	35921	35921	35921	35921	171896	78913	264115	181505	79942	146233	35921	54807	195173	35921	35921	62290	35921	35921	180118	35921	35921	35921	35921	35921	82636	79982	50022	35921
1444	dodecadienoate (12:2)*	Lipid	Fatty Acid, Dicarboxylate	62276	LC/MS Neg	100020478	5146	195.139						1122079	1713673	1081317	2926167	1508941	1630155	1072324	3589901	2553073	1667788	309499	6378999	1152137	1921142	825433	2125839	2029774	1519386	749113	1857460	945180	1476291	1517482	1909587	443248	3583121	1755744	872274	403718	2403290	609376	1016327	2131760	2883357	2275574	895558
1446	dodecanedioate (C12-DC)	Lipid	Fatty Acid, Dicarboxylate	32388	LC/MS Neg	100001102	2990	229.145	693-23-2	12736	12213	C02678	HMDB00623	103850	197805	104451	289626	92283	172213	1656043	246926	342142	81911	81911	1615340	124739	195315	538030	152063	385847	5130295	207904	114853	81911	81911	159262	556957	192411	257642	137531	145932	1334328	299011	136201	155977	201136	81911	158023	225515
1460	eicosanedioate (C20-DC)	Lipid	Fatty Acid, Dicarboxylate	39831	LC/MS Neg	100002951	5200.9	341.27	2424-92-2	75502	68030			255790	328409	236517	227960	302641	463281	961908	354241	589209	450236	641788	548305	779288	418840	235467	702946	629320	444873	703583	573344	319676	307837	329404	213198	276258	1283992	331832	340294	833697	611340	714990	329740	308044	389363	142162	312918
1327	eicosapentaenoate (EPA; 20:5n3)	Lipid	Polyunsaturated Fatty Acid (n3 and n6)	18467	LC/MS Neg	2050	5450	301.217	10-2005-9;10417-94-4	446284	393682	C06428	HMDB01999	2613597	1797124	964815	1758739	1749560	2123128	1620227	6969243	2348433	2917026	927447	2213411	1509148	3085413	1481290	11616997	10082256	3781550	2854359	1211071	9568127	1002808	847758	1506368	475451	1087003	2539163	781297	2036303	1631571	997511	2444269	2766294	3127116	5594482	1324116
1461	eicosenedioate (C20:1-DC)*	Lipid	Fatty Acid, Dicarboxylate	62923	LC/MS Neg	100021105	5095	339.254						277769	504221	402674	367029	339571	580851	483838	489653	381329	441007	589160	920819	1138878	700113	215363	1023695	333314	478838	861327	916924	608587	846276	339058	113345	641017	1206477	546678	287785	442255	801793	578507	130489	415272	865751	54788	466794
1307	eicosenoate (20:1)	Lipid	Long Chain Fatty Acid	33587	LC/MS Neg	100001335	5950	309.28		5282768	4445895	C16526	HMDB02231	20370592	15106933	7268860	16146511	27599500	14318854	19146266	25063944	10853712	22274030	4875835	40746096	8151991	14822555	9023811	29064492	29000578	30686984	7683545	15160036	10588333	19834834	10976355	41467096	5541294	34459300	21517496	13494016	10779425	15018124	16182260	19691794	23823800	18355030	32207326	14368847
1604	eicosenoylcarnitine (C20:1)*	Lipid	Fatty Acid Metabolism(Acyl Carnitine)	57519	LC/MS Pos Late	100015838	1484	454.389						355379	300095	213358	322160	274301	225984	198730	298980	189839	154758	104171	214494	435414	240345	479694	305703	395724	220821	262322	404453	213327	210745	130901	308440	168936	440378	376895	391065	152588	349447	279923	121709	272863	207323	144196	264413
2896	epiandrosterone sulfate	Lipid	Androgenic Steroids	33973	LC/MS Neg	100001287	4855	369.174	22229-22-7	9929317	21403101			7656195	1017876	3334428	2252352	1288967	7204905	5033594	8556553	6963746	1352881	1666599	4794548	11114650	1024323	4384658	1339620	772048	6303446	2744569	8789770	6321809	2152723	3163256	325559	2925266	698214	1271849	2600520	3961431	3118450	11355041	1858883	2135663	1600618	1650708	4279114
1312	erucate (22:1n9)	Lipid	Long Chain Fatty Acid	1552	LC/MS Neg	1087	6355.6	337.311	112-86-7	5281116	7924	C08316	HMDB02068	1920786	2101168	1916032	2562659	2795224	1530849	1511246	1492506	1137693	2129476	831556	3085561	1524475	2470092	3966316	2626855	4065684	1780004	1162574	2579499	1047806	1357434	887801	1889525	610091	2219516	1303527	1327854	1347068	1482123	2134053	1469031	2155363	1260615	1095953	1908077
2907	etiocholanolone glucuronide	Lipid	Androgenic Steroids	47112	LC/MS Neg	100005403	4915	465.249	3602-09-03	270605			HMDB04484	1557919	30514	491670	401086	177173	323605	271251	685167	1645823	144130	122145	267408	374504	269123	315582	137053	64404	549027	242313	688647	606396	99800	153305	117141	220552	280001	224296	264429	369380	613346	653338	342436	103805	134179	212474	187047
1421	glutarate (C5-DC)	Lipid	Fatty Acid, Dicarboxylate	396	LC/MS Polar	339	2900	131.035	110-94-1	743	3618533	C00489	HMDB00661	1027002	2493066	1241171	310416	852880	1093236	1192470	577835	754653	1011743	824684	690488	840568	1436475	773993	1048412	2322154	893938	389259	1772743	462584	607211	962219	773470	388884	2052581	6303290	878943	617974	597718	624631	472717	908031	2434320	2612325	1461766
2456	glycerol	Lipid	Glycerolipid Metabolism	15122	LC/MS Neg	1254	758	91.0401	56-81-5	753	733	C00116	HMDB00131	7198881	5966044	4812969	3196421	3079291	2366767	5796853	6638644	5043969	3767240	2846433	9058082	3590046	2551102	2374953	5528577	10058076	9237085	3760193	5032085	2626549	3587371	3496872	6278771	1949164	8454434	5628503	4596118	3444677	4697543	3282573	7044673	5960103	12690777	8027965	5495930
2457	glycerol 3-phosphate	Lipid	Glycerolipid Metabolism	43847	LC/MS Pos Early	100000258	580	173.021	29849-82-9	754	734	C00093	HMDB00126	183965	216028	174498	126687	162749	195211	158500	108221	152551	286851	138054	192611	67646	120234	156659	109607	101241	134674	152908	149423	144088	237203	67989	96749	160718	75975	210798	342326	122992	210171	157352	151623	102737	127848	124929	88346
1877	glycerophosphoethanolamine	Lipid	Phospholipid Metabolism	37455	LC/MS Pos Early	100001620	659	216.063	33049-08-0	123874	110410	C01233	HMDB00114	1185100	1325745	1036560	1556267	891273	952218	1254797	1115923	1035743	1252393	2256442	508754	2395694	924624	1894784	1523799	1273576	1571466	1299573	1093170	1529768	740318	474067	1382405	1161139	1309644	1294470	1399157	796407	996046	1024922	838630	897965	1071561	637635	1596205
2462	glycerophosphoglycerol	Lipid	Glycerolipid Metabolism	48857	LC/MS Polar	100001619	2430	245.043		439964	388990	C03274		213431	305378	237186	93711	752341	107284	285981	186316	398829	260466	514462	93711	356015	93711	420565	157588	260308	213054	435983	320558	324876	202971	93711	172929	212838	391440	137291	2263702	93711	394921	279085	93711	216215	93711	93711	364145
1873	glycerophosphorylcholine (GPC)	Lipid	Phospholipid Metabolism	15990	LC/MS Pos Early	100000269	672	258.11	28319-77-9	71920	571409	C00670	HMDB00086	35678388	35886772	28168972	43269696	19768488	22296876	45956240	23495844	29068564	22784090	119771032	14122597	67852016	33570308	63657172	39132864	37373864	32658916	43203048	37386808	38852912	12619499	20007302	39447708	33588792	50780712	34845480	37020584	24432444	43348176	27391600	24771608	24485372	25295104	16864640	39436208
2979	glyco-beta-muricholate**	Lipid	Primary Bile Acid Metabolism	62066	LC/MS Neg	100020214	4762	464.302						59881	1298092	54381	20277	205754	87571	106184	82117	136978	64940	24663	32511	96596	261925	33564	20277	96318	69413	194523	124796	90456	175531	182570	529632	133763	125586	54942	44236	238448	592295	20277	57287	130825	20277	46451	22083
2971	glycochenodeoxycholate	Lipid	Primary Bile Acid Metabolism	32346	LC/MS Neg	1628	5236.1	448.307	16564-43-5	12544		C05466	HMDB00637	2052305	6016329	9367757	2142988	10335883	3702566	19984492	2856451	2962429	3051206	1357282	2535625	15736755	24753100	6082952	791495	22063068	32206596	13087944	10850831	4919385	25434764	2401622	25132980	4519999	9640979	2520582	2749964	9677263	3687690	1225272	5725334	3052927	15000564	7489676	6895516
2984	glycochenodeoxycholate 3-sulfate	Lipid	Primary Bile Acid Metabolism	52974	LC/MS Neg	100006641	4820	263.628						313865	335125	322287	160090	847054	173014	974123	307190	189597	326369	384452	383064	1036706	704194	1000616	168442	650108	750577	354406	489692	366659	1163566	44425	1352245	356528	760345	505279	234156	718058	532813	247780	1188233	193418	658230	476954	547074
2982	glycochenodeoxycholate glucuronide (1)	Lipid	Primary Bile Acid Metabolism	52983	LC/MS Neg	100009264	4806	311.666						164414	1099248	219176	39280	807934	340959	896531	171899	1044122	862108	203745	119873	739282	217914	285423	201540	279307	379117	242925	263384	582602	847735	137508	1393243	212233	87088	384738	300873	1754911	147158	162323	408269	212460	99120	165678	242741
2968	glycocholate	Lipid	Primary Bile Acid Metabolism	18476	LC/MS Neg	342	5163	464.302	475-31-0;863-57-0	10140	9734	C01921	HMDB00138	1032041	1931363	1411466	670187	2645712	532055	3213348	744089	723590	1283023	372787	643945	5249274	3235631	1985727	291922	9033590	7309991	5075617	4230150	1662847	8640657	1393381	5842307	801855	1730624	864783	407701	1368031	1730506	340913	1731721	745285	5345474	5388725	2118879
3029	glycocholenate sulfate*	Lipid	Secondary Bile Acid Metabolism	32599	LC/MS Neg	100001989	4750	254.623						1564111	2240504	1932602	1493524	2332272	2638409	3753909	1405590	1178934	1573079	1744624	2223029	3366847	1597506	2178197	2500921	1354956	1625397	1850256	2014410	1493515	4660622	2121105	1516636	1769300	4610827	3400059	1409388	2664419	2375972	2251590	2028484	1450204	1629230	866753	2546423
2992	glycodeoxycholate	Lipid	Secondary Bile Acid Metabolism	18477	LC/MS Neg	100000436	5281	448.307	360-65-6	3035026		C05464	HMDB00631	2950039	3842404	8808962	1030365	5587113	4051039	6199129	3528425	5474859	2807443	1192902	1220197	6638811	10708994	2608345	722776	5204377	12123027	15377917	8553506	3982694	8083048	5074030	722776	3772853	722776	2495114	2363693	11817989	2767673	1035209	1923311	4333794	722776	4119952	2679613
3034	glycodeoxycholate 3-sulfate	Lipid	Secondary Bile Acid Metabolism	52975	LC/MS Neg	100006642	4875	263.628						358126	941118	621506	155596	1332359	754101	1001791	1053379	2498175	1009160	719510	407271	1275694	534306	925956	494080	295239	591382	741718	1163717	436347	1328975	353002	844623	904443	127795	1467571	522251	3738332	597864	710610	842853	586745	144783	745839	525391
3020	glycohyocholate	Lipid	Secondary Bile Acid Metabolism	42574	LC/MS Neg	100004083	5020	464.302						32353	81636	90607	39981	59881	43202	209674	74364	32574	23786	19582	142434	239945	228881	76687	19582	156183	209630	162356	84297	61792	237563	47500	361127	95588	244199	19582	78008	138342	215904	19582	193507	19582	106723	82723	38384
3002	glycolithocholate	Lipid	Secondary Bile Acid Metabolism	31912	LC/MS Neg	100001064	5357.1	432.312	474-74-8	115245	103116	C15557	HMDB00698	22246	173712	19897	19897	120287	390569	102596	63257	150641	19897	69136	19897	99384	261267	25035	19897	136605	243575	476075	492233	124318	178412	31928	19897	424936	19897	87759	84858	278475	162274	23036	19897	19897	19897	19897	70627
3003	glycolithocholate sulfate*	Lipid	Secondary Bile Acid Metabolism	32620	LC/MS Neg	100001657	5011	255.631	15324-64-8	72222	65188	C11301	HMDB02639	1340198	3339972	852578	1127643	1572583	7189233	1468196	7366987	3791517	974439	3284608	775353	1598454	1060902	4565709	2065185	1346215	1982239	2664927	2778348	2053927	3422347	1729576	2934847	2780660	332213	5392249	3088248	7460066	5316205	1768020	2684759	2338117	122751	2023967	1598055
3010	glycoursodeoxycholate	Lipid	Secondary Bile Acid Metabolism	39379	LC/MS Neg	100002911	5033	448.307	64480-66-6	12310288	19973534		HMDB00708	512196	1485574	1056533	94810	833485	392051	4084913	157449	560865	97234	26450	921357	549585	8638642	209946	76865	1616290	1813037	760811	753164	560728	3457689	645272	1150658	441329	509811	521386	898119	997560	383010	254943	1045549	559043	9127824	543470	1172147
1270	heptanoate (7:0)	Lipid	Medium Chain Fatty Acid	1644	LC/MS Neg	925	3670	129.092	111-14-8	8094	7803	C17714	HMDB00666	856443	684885	591313	775475	556037	683082	627477	893816	718792	662463	683145	731668	602908	743285	626296	863360	484674	629865	657952	982990	606898	816665	631587	551168	559432	618997	540503	561230	567080	541549	579963	637861	442010	610796	423520	544161
1435	heptenedioate (C7:1-DC)*	Lipid	Fatty Acid, Dicarboxylate	61866	LC/MS Polar	100019981	2816	157.051						915845	1014464	1496416	1504758	3401095	913321	902611	1535650	1986831	938679	1046409	1259846	1557493	2360598	848876	878775	561449	1185981	3210866	1273567	561449	1166347	1605192	704568	1119650	1789970	5115767	2557690	2332037	896501	1835687	1258422	561449	1929471	825444	888378
1321	hexadecadienoate (16:2n6)	Lipid	Polyunsaturated Fatty Acid (n3 and n6)	57652	LC/MS Neg	100009394	5398	251.202	28290-73-5		13628094		HMDB00477	2869076	1720642	573234	3109600	1555627	1122285	2578101	5105229	1897844	1522723	291080	5588149	865181	1549940	629795	6133480	3739153	6095867	656309	1593532	2810754	1335703	2709616	2855622	473396	2847713	3167228	743472	759927	2019819	1161028	3491766	3323695	4460873	6608418	798321
1451	hexadecanedioate (C16-DC)	Lipid	Fatty Acid, Dicarboxylate	35678	LC/MS Neg	100001614	4615	285.207	505-54-4	10459	10027	C19615	HMDB00672	136709	200100	109712	161982	209602	199729	371880	119515	507656	160311	121911	573277	299366	161200	147084	231240	163698	436307	283822	223572	75473	274843	168902	368572	114237	267737	236557	167545	2247526	213616	151373	318299	163882	116554	267452	255408
2739	hexadecasphingosine (d16:1)*	Lipid	Sphingosines	57428	LC/MS Pos Late	100015723	1289	272.258			28533427			61416	32917	67881	63984	61667	32917	32917	77350	127979	73690	104568	32917	87897	60630	37387	73679	32917	90748	85318	32917	35031	47783	34221	32917	32917	59280	69327	89849	55946	41648	32917	63758	32917	57048	32917	40466
1453	hexadecenedioate (C16:1-DC)*	Lipid	Fatty Acid, Dicarboxylate	61862	LC/MS Neg	100019975	4380	283.191						48997	143099	101676	63397	172168	178973	364316	96566	341902	48997	151416	326059	323182	167323	95461	410926	48997	203472	283823	227230	54183	199084	144910	239697	111264	277371	141959	194973	683426	178064	170441	218787	48997	48997	161550	288013
1564	hexanoylcarnitine (C6)	Lipid	Fatty Acid Metabolism(Acyl Carnitine)	32328	LC/MS Pos Early	100000781	3358	260.186	6920-35-0	6426853	4932273		HMDB00705	2389530	1440870	1519162	3201417	1259902	2331895	1061568	3170592	2303715	1929752	563847	3889548	1720176	2213199	949485	2326419	2409079	1843894	914346	806117	1159902	1741855	1643849	1859305	657079	1630126	1866792	1510760	1012483	2081917	1406279	1648199	1380322	3914195	1164003	1411040
1530	hexanoylglutamine	Lipid	Fatty Acid Metabolism (Acyl Glutamine)	54907	LC/MS Neg	100001733	2780	243.135						21941	37969	21941	65906	21941	21941	60758	53782	21941	43934	21941	109537	47351	37341	48254	21941	21941	147296	23044	21941	21941	73394	76198	37672	21941	21941	67992	29697	113742	84522	39767	111982	21941	90183	27666	105361
1464	hydroxy-CMPF*	Lipid	Fatty Acid, Dicarboxylate	62277	LC/MS Neg	100019794	1516	255.087						4163277	1386338	1655097	4314531	2186616	5005396	2103734	3084957	9801684	3235884	841444	158017	4416725	1401246	4098110	7818901	9150081	2631945	7293723	1286868	18259138	772365	3978392	4407462	7984350	127158	4324677	1136653	6673307	2342553	2299962	703251	3647835	5838029	960976	1305281
3019	hyocholate	Lipid	Secondary Bile Acid Metabolism	34093	LC/MS Neg	100001279	5046	407.28	547-75-1	92805	21403098	C17649	HMDB00760	71384	878897	82365	37114	52094	16696	224712	16696	29035	16696	16696	70897	167227	135948	16696	16696	43689	81150	16696	149767	16696	31079	16696	16696	16696	228214	16696	16696	189498	70626	16696	42186	81713	222805	16696	16696
3009	isoursodeoxycholate	Lipid	Secondary Bile Acid Metabolism	57577	LC/MS Neg	100002488	4809	391.285	78919-26-3	127601	113205	C17662	HMDB00686	556003	1165143	183841	215748	593422	584404	1464056	172226	574344	73419	217631	2157405	305946	4633406	218433	721012	373604	401473	115795	448055	450763	312366	262817	202969	306713	415010	864853	756746	693867	309704	913922	607987	755084	3921015	131181	959639
1277	laurate (12:0)	Lipid	Medium Chain Fatty Acid	1645	LC/MS Neg	181	5300	199.17	143-07-7	3893	3756	C02679	HMDB00638	28423052	46930676	18078088	57292640	12249241	33445680	105423256	45060092	36939488	35108040	16458451	196985616	16018596	23372368	49494872	29806072	129120200	857792512	16648122	12187337	15722611	15819794	24232744	89688008	13014191	47683680	29604800	15644378	46453232	18896516	24238028	38268884	69693744	32798010	22449068	12272323
1575	laurylcarnitine (C12)	Lipid	Fatty Acid Metabolism(Acyl Carnitine)	34534	LC/MS Pos Late	100001392	1235	344.28	25518-54-1	10427569	8602997		HMDB02250	3701613	2558286	2879882	4757977	1945655	8016659	3725272	5122800	3504234	2754341	998471	10297838	3833415	4278095	1392478	3255737	5083069	5709479	2103184	2244338	1638981	5211986	2221562	3242997	737271	5280142	3283768	3580273	2639822	6565843	3555832	3439437	2541707	6615722	2884329	1255259
1611	lignoceroylcarnitine (C24)*	Lipid	Fatty Acid Metabolism(Acyl Carnitine)	57515	LC/MS Pos Late	100015834	1603	512.467						536647	372386	834057	1060977	712129	365403	449273	804734	869695	494991	486962	382333	826036	535877	1403977	651326	913570	484712	651487	1053266	266475	227776	342278	537239	621695	490869	775244	1031827	677438	492009	427694	394823	793454	523118	227776	725351
1334	linoleate (18:2n6)	Lipid	Polyunsaturated Fatty Acid (n3 and n6)	1105	LC/MS Neg	180	5535	279.233	60-33-3	5280450	4444105	C01595	HMDB00673	534454400	355080384	130149136	523210592	457406240	238931984	429558592	1123292672	491300864	498267808	93482736	1386996992	203721488	342128256	226832304	759193664	781804608	1027073024	181297392	361334272	396960832	339024224	317125888	806699776	112856024	837785792	613484096	345129088	136474928	277788128	309007616	537738944	612117888	787169024	1132380160	523308096
1336	linolenate [alpha or gamma; (18:3n3 or 6)]	Lipid	Polyunsaturated Fatty Acid (n3 and n6)	34035	LC/MS Neg	100001337	5450	277.217		5280934	4444437	C06426	HMDB03073	59268712	42104424	12378498	55235336	20630632	19655528	38089624	127248880	85276592	52291588	8787407	190989616	17170552	38032788	15995810	96394992	141423616	112654456	17013976	59044168	31609904	27350456	37586164	65140240	13444886	68149616	84436696	23650208	11945047	35832784	29431876	58414376	57938136	91200968	174038608	26442348
1582	linolenoylcarnitine (C18:3)*	Lipid	Fatty Acid Metabolism(Acyl Carnitine)	57511	LC/MS Pos Late	100015831	1310	422.326						423588	400182	196297	286821	289900	298514	115907	401887	385772	193013	67470	490182	585443	284400	609454	456188	661008	292042	196277	468116	422676	269282	191921	260812	196752	441751	487141	171281	67470	527682	236478	200152	298923	425567	296806	230783
1581	linoleoylcarnitine (C18:2)*	Lipid	Fatty Acid Metabolism(Acyl Carnitine)	46223	LC/MS Pos Late	100003151	1430	424.342	36816-10-1	6450015	4952667		HMDB06469	7265613	6231386	4194943	5925581	8551556	4866684	3664902	6072780	4551571	3001589	2070777	5911417	11165964	4910970	10448416	7058508	5840738	5528433	4054379	6624693	7614423	5500400	3540313	4985070	3851850	10237027	6679866	4089508	1759444	5917993	5341059	3199490	5969158	6378136	3994084	5815520
1636	linoleoylcholine*	Lipid	Fatty Acid Metabolism (Acyl Choline)	57463	LC/MS Pos Late	100015760	1388	366.337						844042	537313	94268	720508	88328	81516	601904	81516	391016	1116229	1136238	123079	1859703	1372783	3529598	953741	2077729	1679256	2882321	1234106	983482	81516	136840	3745435	728953	736627	723955	402678	230589	444262	171913	564776	474634	456963	94622	670614
3000	lithocholate sulfate (1)	Lipid	Secondary Bile Acid Metabolism	62526	LC/MS Neg	100020823	4811	227.12						246094	202573	23484	82407	77090	265248	76341	522755	151194	46759	161223	30431	36711	75251	179608	701872	75204	47301	129169	225089	492936	269709	278685	157682	315099	23484	185844	243440	1044114	351888	199953	78668	213272	23484	23484	23484
1433	maleate	Lipid	Fatty Acid, Dicarboxylate	20676	LC/MS Polar	100000707	2640	115.004	110-16-7	444266	392248	C01384	HMDB00176	12916044	15473143	23716752	29154274	15287035	35655984	15867833	15556116	19524316	4356140	5105650	3997952	37366344	15771775	5349958	7812527	6700233	17020386	10861568	16969892	3322350	6003407	7438711	10392430	4066946	5392274	5247272	18508192	48537520	6042846	18670058	4485775	5971496	6420667	5755445	13721276
1253	malonylcarnitine	Lipid	Fatty Acid Synthesis	37059	LC/MS Pos Early	100001526	2086	248.113	853728-01-5	22833583	21403153		HMDB02095	135143	44256	81787	65372	106720	59905	44256	88489	44256	59738	57530	44256	96394	95682	84922	88382	88661	114047	54565	57137	91143	80691	120826	73201	44256	51730	110486	64774	64793	58723	84160	159149	71521	102263	90698	108552
1288	margarate (17:0)	Lipid	Long Chain Fatty Acid	1121	LC/MS Neg	891	5731	269.249	506-12-7	10465	10033		HMDB02259	17335108	20499492	9709869	20251882	14373303	11792542	15883979	27030484	22755048	18836900	9070816	26064732	10541224	16461506	8452845	31836588	17918680	27603518	10514551	9869866	13041673	14440549	11873009	26800280	8049057	23671586	25612652	14855470	20324228	11101028	13668262	19283534	20003960	19427524	21419304	11281589
1612	margaroylcarnitine (C17)*	Lipid	Fatty Acid Metabolism(Acyl Carnitine)	57512	LC/MS Pos Late	100004054	1424	414.358	106182-29-0		35015987		HMDB06210	222161	254282	226836	262444	185735	211801	162132	239721	470075	169865	230063	133462	420760	280410	192271	327354	156559	278248	283612	188669	201673	169725	130373	222687	252697	278939	585991	294032	186780	217226	214595	148898	168830	206134	96972	219233
1345	mead acid (20:3n9)	Lipid	Polyunsaturated Fatty Acid (n3 and n6)	35174	LC/MS Neg	100001472	5650	305.249	20590-32-3	5312531	4471956		HMDB10378	1211490	686883	356210	848071	847169	596188	511242	1986529	772281	1364837	298042	2586404	1045303	1258889	435826	1663788	790156	2027301	709843	413838	541056	515939	401249	2858075	353997	1484792	1341583	949847	430089	624771	705633	1480403	1145020	1070336	2573397	343240
1529	methylmalonate (MMA)	Lipid	Fatty Acid Metabolism (also BCAA Metabolism)	1496	LC/MS Polar	418	3078.4	117.019	516-05-2	487	473	C02170	HMDB00202	12622242	13446502	10759752	10377708	11090509	11755657	10046468	12887356	10648999	10530687	10189083	10222784	17952032	9146672	9451398	10282880	14972014	8220221	14617323	11860174	12234214	8612879	9162550	12168620	12333556	14271233	15079549	12703488	11113575	13578387	10440788	11171173	10880536	8744903	7847095	12498171
1840	myo-inositol	Lipid	Inositol Metabolism	1124	LC/MS Polar	363	3506.3	225.062	87-89-8	892	10239179	C00137	HMDB00211	14599230	10406264	8164919	9768096	9254875	7748945	10269429	9567036	17002188	6939408	7546248	7353518	12831390	6603528	13626219	14994695	21906284	11042250	13916353	14975840	10947184	7565471	8352239	9312918	8090634	11802888	11024342	12988862	8720973	10644626	13302589	10460879	8662453	8165047	8366532	9097061
1280	myristate (14:0)	Lipid	Long Chain Fatty Acid	1365	LC/MS Neg	519	5440	227.202	544-63-8	11005	10539	C06424	HMDB00806	119458496	143991504	51833372	123908840	57192928	55489424	155468208	164517776	84150488	85122160	44323320	263367504	40306936	80755592	41599460	188613568	148458432	424897440	46164564	36943988	54876296	59893732	79690640	151757472	39476548	134278720	141360096	50719688	138532896	55848792	75481696	174734912	109453376	129165568	139558016	34862860
1281	myristoleate (14:1n5)	Lipid	Long Chain Fatty Acid	32418	LC/MS Neg	100001198	5346.9	225.186	544-64-9	5281119	4444564	C08322	HMDB02000	18365228	14462726	5557239	19537718	6540898	8452171	26811782	28156786	8889493	8081305	3326823	48278644	4112664	11054090	1810544	20087248	12960520	45986932	3700529	4660034	7290686	9875207	18026864	16405305	2441453	18790380	17978172	5012147	10853604	14405187	10582312	28864332	15362580	21902676	35921468	2465037
1586	myristoleoylcarnitine (C14:1)*	Lipid	Fatty Acid Metabolism(Acyl Carnitine)	48182	LC/MS Pos Late	100006051	1316	370.295	889848-55-9	90659872	34999520			3946664	3053449	2637421	4596957	2442047	7896990	2199243	5778608	2612026	2298979	667408	9666097	3664783	3555591	1503797	3028469	5969487	2744522	2353837	3038482	1827613	5678715	2628073	2942358	703022	5680941	3516033	3512015	1494128	9415901	4212935	3979898	2995952	5986514	4512120	2201018
1576	myristoylcarnitine (C14)	Lipid	Fatty Acid Metabolism(Acyl Carnitine)	33952	LC/MS Pos Late	100001270	1350	372.311	18822-89-4	6426854	4932274		HMDB05066	1438493	1206579	1097392	1236639	1155901	1559192	1510387	1268307	1181064	1180213	757678	2256783	1335592	1165528	906941	1116766	1140707	1599509	1101223	740065	782843	1071106	603315	1273036	776870	1372226	1417172	914625	1190449	1681860	1322719	1237676	804779	1476863	744723	767741
1513	N-acetyl-2-aminooctanoate*	Lipid	Fatty Acid, Amino	62059	LC/MS Neg	100020204	3943	200.129		95555	86248		HMDB59745	200816	132573	182719	85215	460269	112335	227429	198505	280898	107894	157203	174246	374579	216484	187619	539290	112255	84619	245717	401815	249922	50909	116177	50743	72708	384157	264770	291678	163321	214848	223586	204143	278825	158821	138467	354048
1835	N-oleoylserine	Lipid	Endocannabinoid	57664	LC/MS Neg	100015641	5600	368.281			21466990			28127	43503	24315	36233	25247	29063	28358	24315	33771	52250	24315	24315	38928	45451	60243	62215	151936	50160	29947	62541	49860	58723	29614	24315	24315	110465	43171	24315	49693	52670	47649	29244	82289	53259	24315	53167
1817	N-oleoyltaurine	Lipid	Endocannabinoid	39732	LC/MS Neg	100003119	5610	388.253	52514-04-2	6437033	4941625			19614	61782	37576	65133	19614	48025	19614	26996	22419	39834	19614	19614	19614	19614	19614	19614	36271	50060	19614	40816	19614	48315	19614	53219	19614	105671	55151	19614	35834	50872	28567	36359	68074	32310	66620	83592
1548	N-palmitoylglycine	Lipid	Fatty Acid Metabolism(Acyl Glycine)	42092	LC/MS Neg	100003686	5580	312.254	2441-41-0	151008	133100		HMDB13034	86223	120506	55506	104776	56578	77301	108980	82078	72770	102061	56989	161290	69423	122370	62523	101097	69034	170710	56921	103236	33591	121721	87132	47103	48928	186904	75594	74665	74702	68972	89585	76612	109306	108399	93838	86925
1837	N-palmitoylserine	Lipid	Endocannabinoid	57659	LC/MS Neg	100015640	5557	342.265	58725-46-5;474943-14-1	6453686	4956046			144905	60624	86925	60624	60624	115028	101614	60624	95846	60624	106711	60624	122892	101390	139181	66682	60624	60624	140699	140081	60624	78085	60624	60624	89555	60624	76665	123601	115110	134941	93656	60624	60624	67036	60624	65746
1613	nervonoylcarnitine (C24:1)*	Lipid	Fatty Acid Metabolism(Acyl Carnitine)	57531	LC/MS Pos Late	100015846	1602	510.452						127313	98792	119619	101763	112505	89467	54386	170959	158556	112729	54386	90087	202021	162126	230272	135612	205131	138243	150937	189947	54386	54386	95084	118754	92707	138430	224548	213064	119319	108144	119094	70890	86547	109208	57205	139428
1333	nisinate (24:6n3)	Lipid	Polyunsaturated Fatty Acid (n3 and n6)	57810	LC/MS Neg	100015785	5657	355.264	68378-49-4	11792612	9967286		HMDB02007	151104	95384	55627	98664	175208	55627	55627	55627	55627	520159	55627	156283	77153	410858	87332	321140	118352	313861	72282	55627	73544	55627	55627	291258	55627	55627	55627	55627	55627	74967	55627	127879	151000	55627	55627	55627
1569	nonanoylcarnitine (C9)	Lipid	Fatty Acid Metabolism(Acyl Carnitine)	61775	LC/MS Pos Late	100006620	1003	302.233			28533402		HMDB13288	208105	167445	230195	373014	154311	379039	126112	231887	477461	207816	111217	281209	68565	305453	108467	231602	259240	154829	106303	68565	100550	268862	176799	184678	68565	243236	217624	149404	123774	253891	197433	152069	123999	463413	114980	95711
1458	octadecadienedioate (C18:2-DC)*	Lipid	Fatty Acid, Dicarboxylate	61860	LC/MS Neg	100019982	4676	309.207						76617	175950	97806	175210	834195	1111009	922548	183021	1452810	148374	129090	546888	958128	288127	1032467	354617	533750	295304	502779	791589	91347	236612	186976	355831	295399	681334	429751	667912	466186	326659	182944	321446	424575	232147	281306	535153
1455	octadecanedioate (C18-DC)	Lipid	Fatty Acid, Dicarboxylate	36754	LC/MS Neg	100001615	5043	313.238	871-70-5	70095	63283		HMDB00782	237135	302405	147892	271499	254908	296661	271162	206244	1016409	193723	164047	624960	529130	252492	365315	220900	424933	898435	613309	358968	98328	343869	417148	592470	188234	188130	337665	303152	822220	340715	268603	226160	143951	196742	234228	184227
1595	octadecanedioylcarnitine (C18-DC)*	Lipid	Fatty Acid Metabolism(Acyl Carnitine)	61867	LC/MS Pos Late	100005998	1227	458.348	123233-50-1		28639203			147995	175296	221539	186598	215426	149911	244893	236529	488566	149667	182506	197080	541004	251016	144260	269771	316268	404417	340881	341332	100363	268760	310603	193103	114665	273414	320590	379791	368271	203322	386549	277804	122726	186726	123270	209398
1456	octadecenedioate (C18:1-DC)*	Lipid	Fatty Acid, Dicarboxylate	61861	LC/MS Neg	100019978	4875	311.223						973447	1251055	915397	777813	3784423	1554424	2906718	936909	6624823	1408164	918213	3119804	5622163	1105900	2281586	1826709	3739369	2174728	2489595	3493544	1288566	1846983	1404551	2980908	862591	3728200	1544250	4776663	5967843	1858170	1570697	1441811	1771655	766839	1002104	2698352
1596	octadecenedioylcarnitine (C18:1-DC)*	Lipid	Fatty Acid Metabolism(Acyl Carnitine)	61865	LC/MS Pos Late	100005996	1180	456.332	251981-06-3		28639201			228708	211204	267486	190451	344713	241320	381651	216230	1016975	161573	153757	585450	898717	281749	233406	277371	562272	303054	400755	512013	140619	379951	405293	358778	118858	690010	458783	680171	589614	309106	497071	391446	229912	225908	258166	377980
1567	octanoylcarnitine (C8)	Lipid	Fatty Acid Metabolism(Acyl Carnitine)	33936	LC/MS Pos Late	100001247	950	288.217	3671-77-0	123701	110274	C02838	HMDB00791	8940702	6985153	9565472	15989468	5506000	16897860	4061196	12688383	14395118	9311781	2043808	19341604	7533816	12407939	4631688	10747237	17369208	7631392	3718696	4608064	4489703	11372156	7342637	8603964	1625685	13408479	6859272	5015428	3978422	15303662	7144500	5399943	7093649	24785048	6531719	3793004
1293	oleate/vaccenate (18:1)	Lipid	Long Chain Fatty Acid	52285	LC/MS Neg	100008930	5655	281.249						1323764992	1245406976	366824672	1190371456	912351808	573797760	1187009280	2039815808	694538496	1142472192	230317168	2659653888	367929856	697536448	463603840	1788220288	1644508672	2159460096	399347008	730914432	661555840	820332736	694417856	1609235840	223325616	1929554560	1381465216	875905344	502892160	764579264	769208576	1433221760	1391992960	1354387584	2278035712	1119826304
1805	oleoyl ethanolamide	Lipid	Endocannabinoid	38102	LC/MS Neg	1137	6450	324.291	11-58-0;111-58-0	5283454	4446574		HMDB02088	246687	205806	170173	230343	161013	204137	179593	142405	97018	192629	69952	276498	195042	146343	216609	243637	228747	305384	103094	211366	150051	290644	110531	155218	91351	280463	255642	86855	83750	174979	185692	170882	242362	219036	137934	192332
1584	oleoylcarnitine (C18:1)	Lipid	Fatty Acid Metabolism(Acyl Carnitine)	35160	LC/MS Pos Late	100001501	1423	426.358	38677-66-6	6441392	21403150		HMDB05065	13022063	12161244	7941026	9859251	8123436	8017479	7506654	9239836	5532980	6096606	3943833	8512514	12795579	7012084	10334253	10289397	8917911	8918672	6253787	8484481	7079710	9170192	6233611	7182482	4671512	16075853	11008604	8109265	3755242	12414296	9218907	6149544	8408808	8122052	5803570	8989409
1632	oleoylcholine	Lipid	Fatty Acid Metabolism (Acyl Choline)	53260	LC/MS Pos Late	100009331	1449	368.352						469507	370351	55413	355875	55413	55413	286536	55413	119682	669083	580203	55413	741755	566541	1252198	531034	859893	1015101	1367056	515599	359495	55413	58786	1864211	264375	347034	377393	227314	108837	217579	66921	273324	231948	160666	55413	263584
1285	palmitate (16:0)	Lipid	Long Chain Fatty Acid	1336	LC/MS Neg	424	5618	255.233	57-10-3	985	960	C00249	HMDB00220	1197827712	1060677632	495888480	1053165568	810072128	649191488	1059354752	1563287808	750924480	1199496064	422415936	2015568384	511936064	835554624	526233536	1658926720	1091956352	1946771200	667840512	795070912	705379968	774811008	691277760	1671151872	397551008	1593228672	1242585216	864427072	826071552	679391424	740479424	1540270208	1075830912	1333591168	1829188864	585114240
1286	palmitoleate (16:1n7)	Lipid	Long Chain Fatty Acid	33447	LC/MS Neg	452	5475	253.217	373-49-9	445638	393216	C08362	HMDB03229	171085600	71313616	25672020	128091152	58886600	64730260	181423680	228871408	35651200	89714536	17029812	384674976	29162136	86319392	20375860	192746064	136609232	415660224	24040970	34722208	77733896	90192472	141411248	163233600	18620288	131249200	172936176	61127892	33581776	91957768	89919176	378912032	140944144	182305968	521593472	19779724
1579	palmitoleoylcarnitine (C16:1)*	Lipid	Fatty Acid Metabolism(Acyl Carnitine)	53223	LC/MS Pos Late	100009406	1357	398.326		71464547	28639183			1922285	1357114	1060810	1635041	1131587	1833847	960171	1914201	765261	968651	574537	2610715	1568586	1463500	893953	1528781	1675335	1757556	1013362	1210198	1476486	1559203	1117999	1217019	546705	1975797	2119721	1488169	701720	2483651	1582422	1686927	1318704	1649054	1660593	920744
1808	palmitoyl ethanolamide	Lipid	Endocannabinoid	38165	LC/MS Neg	1489	6300	298.275	544-31-0	4671	4509	C16512	HMDB02100	422812	362082	199588	274456	303253	317720	377213	210405	258011	342277	237897	234400	350820	335186	303456	351665	347965	370427	243544	249650	343629	349701	222602	183476	191767	502941	370852	224876	209347	271513	285546	278618	331437	366680	142141	277684
2706	palmitoyl-sphingosine-phosphoethanolamine (d18:1/16:0)	Lipid	Ceramide PEs	62984	LC/MS Pos Late	100021162	2207	661.528						199206	216003	182827	278004	194066	185609	230651	223737	272519	180564	207340	183275	308885	190907	170307	212101	174612	259202	261218	199521	210783	145524	154786	147752	209670	223615	281758	341135	249833	233770	218815	152302	185780	213205	104653	270412
1578	palmitoylcarnitine (C16)	Lipid	Fatty Acid Metabolism(Acyl Carnitine)	44681	LC/MS Pos Late	100000776	1425	400.342	6865-14-1	461	448	C02990	HMDB00222	6811891	5464120	3950582	5791577	4720600	4556939	5678896	5396290	5045670	4947016	3838525	5515426	6474407	5363535	5046689	7341531	4458576	5584544	5657440	5035647	4197009	4741184	3373049	6106197	4442553	7809802	7180466	6079695	3178688	5934027	5434848	5182015	3608106	6161476	3511966	4502858
1631	palmitoylcholine	Lipid	Fatty Acid Metabolism (Acyl Choline)	52944	LC/MS Pos Late	100009233	1482	342.337		151731	133731			848331	551894	85048	643446	89485	67836	486033	69258	250078	1230985	834674	67836	1130903	1191495	2322462	1015259	1312816	1435979	2651601	870991	772991	67836	141570	3450797	556040	639779	722227	333951	194839	370600	141685	544995	413229	407760	111881	412608
1272	pelargonate (9:0)	Lipid	Medium Chain Fatty Acid	12035	LC/MS Neg	437	4798	157.123	112-05-0	8158	4574394	C01601	HMDB00847	4339076	4001588	3539083	3781797	3269617	3047850	3479705	2957306	5967457	2620655	3221754	7013618	4371029	4913014	4021376	8073360	3779625	7197995	4884387	7638876	4456264	7241952	3658429	4068502	2884677	8274058	2948156	4115444	3425606	2638812	5754852	3354838	3221656	3133444	2599806	4167038
1284	pentadecanoate (15:0)	Lipid	Long Chain Fatty Acid	1361	LC/MS Neg	980	5521	241.217	1002-84-2;10002-84-2	13849	13249	C16537	HMDB00826	24530194	26734080	16573473	25728984	16684524	17160518	23880076	30257894	21386864	20724632	15261050	30919810	15060442	20023222	15302103	35514592	21671132	31879208	16832294	15254187	17096860	18871342	19257636	24678234	14703472	26473678	31505470	16864920	28954512	15547837	19513288	29869302	21490032	25652068	24710344	15212293
1875	phosphoethanolamine	Lipid	Phospholipid Metabolism	1600	LC/MS Pos Early	1026	700	142.026	1071-23-4	1015	990	C00346	HMDB00224	1026558	1353866	1222256	1234406	646538	1271555	1031383	1149321	1004412	1278700	983127	721516	1990840	1014601	872230	2334244	1394263	1987495	851901	765133	2037103	1468422	802212	712044	555058	2235215	978240	1349011	637918	875216	1424555	598552	812157	849203	530090	898471
1558	picolinoylglycine	Lipid	Fatty Acid Metabolism(Acyl Glycine)	63057	LC/MS Neg	100021198	1867	179.046	5616-29-5	11788622	9963296		HMDB59766	46940	22505	22505	28738	44320	39906	26153	78943	1506601	60578	40460	22505	102249	32212	62859	31449	22505	22505	33806	39550	43322	22505	22505	22505	22505	22505	78716	98108	79509	22505	22505	22505	65527	56008	23970	83771
1588	pimeloylcarnitine/3-methyladipoylcarnitine (C7-DC)	Lipid	Fatty Acid Metabolism(Acyl Carnitine)	53224	LC/MS Pos Early	100009407	2773	304.175						410586	317656	239271	187933	104458	295072	184314	147495	450176	144667	127387	158704	399146	311994	332219	364538	528135	156895	189964	339462	254552	318710	179661	212716	117015	250108	258539	349598	361342	244143	539303	177946	206694	224406	267121	178098
2851	pregnanediol-3-glucuronide	Lipid	Progestin Steroids	40708	LC/MS Neg	100003470	5145	495.296	1852-49-9	123796	110346		HMDB10318	138792	38730	208015	207396	110251	329922	238933	179565	165435	148687	31101	239558	172426	270167	1979986	49853	240386	335403	235306	402582	17007272	245277	168242	121950	734334	1966451	158708	1342670	623093	4058351	471862	86448	31101	190240	120954	53786
2856	pregnanolone/allopregnanolone sulfate	Lipid	Progestin Steroids	48394	LC/MS Neg	100006173	5160	397.205						29630	17747	95670	25995	17747	85448	41549	17747	39625	35826	17747	46797	91810	55063	607501	31815	17747	113477	71320	155990	8208305	181517	17747	25256	218753	355745	62388	312520	93707	887590	48935	41122	45073	61677	17747	22528
2828	pregnenediol disulfate (C21H34O8S2)*	Lipid	Pregnenolone Steroids	32562	LC/MS Neg	100001993	3868	238.077						4529994	1953769	4057785	4279647	4313766	5646844	8409706	4249229	1745237	2446641	1626123	4008228	11442583	5807744	11107605	2763690	1447857	14958910	6029511	6904469	1933442	6667431	2398621	4953053	3820206	24923168	6659071	15914098	4798563	13315670	13710766	1721094	1106027	2454121	5714698	4151188
2827	pregnenediol sulfate (C21H34O5S)*	Lipid	Pregnenolone Steroids	32619	LC/MS Neg	100002067	5000	397.205	1247-64-9		13465233			1743284	860764	2562066	2713061	1367410	3372539	3002731	4320387	1230875	698218	679262	3070453	6439346	2311057	2967822	1478426	1409295	7609668	2386116	6384799	1387086	5183344	1801674	1632028	1472915	10779260	2532611	10044113	2364789	5668517	5223929	751272	562284	1740059	1601178	1810914
2830	pregnenetriol disulfate*	Lipid	Pregnenolone Steroids	62921	LC/MS Neg	100021104	3504	246.075						1440416	617347	1448061	1023923	1392577	1248509	2636475	1227300	489727	602079	404870	1273799	2602590	1941249	3085461	799229	356044	4499309	1327915	1827234	411546	1518972	1029343	1194012	776446	4949478	1735032	3627493	1269094	3674732	3731967	726802	328475	1091749	2847016	1324246
2829	pregnenetriol sulfate*	Lipid	Pregnenolone Steroids	62922	LC/MS Neg	100021103	4749	413.2						985328	397065	1468071	1063402	1033755	1245375	1764622	1665341	479049	203413	310232	1303704	2419258	1010394	1229614	723607	568736	3673763	1032187	2836681	489052	2584364	1058211	666394	509422	3801403	989499	3352201	1370064	3054675	2958249	646521	260329	992226	1148253	875146
2811	pregnenolone sulfate	Lipid	Pregnenolone Steroids	38170	LC/MS Neg	100002129	5100	395.19	1247-64-9	105074	94802		HMDB00774	287101	86778	525543	1077935	161945	1111996	752314	1044429	539341	222210	86778	437785	2734518	552476	687408	349627	238022	1656144	474961	1472915	312518	1012491	351362	478406	252564	2388898	375082	2161755	851980	2211468	1272000	169477	86778	525500	453546	241744
1412	pristanate	Lipid	Fatty Acid, Branched	38271	LC/MS Neg	477	5773	297.28	1189-37-3	123929	110458		HMDB00795	41029	230289	80021	41029	128091	90250	41029	218488	262991	317678	41029	318292	266034	253831	41029	284889	161595	299059	41029	69802	41029	41029	41029	219069	91580	220520	153802	41029	303916	312918	41029	145980	41029	41029	41029	180928
1526	propionylcarnitine (C3)	Lipid	Fatty Acid Metabolism (also BCAA Metabolism)	32452	LC/MS Pos Early	100001162	2590	218.139	17298-37-2	107738	96904	C03017	HMDB00824	17628004	13329663	11802266	13584120	16381772	20471466	9280559	25833966	29765804	11467752	12356085	11065205	17193472	13404650	14788919	15909220	11980695	8762213	11436515	6982389	16741641	13404105	9769058	8038393	21175292	7559667	22720508	24871946	13368898	11246993	14664385	12094237	13935335	13234004	7114805	21167882
1527	propionylglycine	Lipid	Fatty Acid Metabolism (also BCAA Metabolism)	31932	LC/MS Neg	100001150	960	130.051	21709-90-0	98681	89122		HMDB00783	70538	100056	36358	55722	151939	36358	77755	186256	272600	36358	36358	36358	92578	205285	162272	97273	36358	95846	88125	162175	91092	36358	36358	36358	136718	36358	36358	112469	136100	36358	103204	56319	168754	36358	88500	440442
1442	sebacate (C10-DC)	Lipid	Fatty Acid, Dicarboxylate	32398	LC/MS Polar	100001211	2147	201.113	111-20-6	5192	5004	C08277	HMDB00792	198713	273922	274382	312266	200443	222295	513349	319396	522605	141031	273743	926387	367143	399805	401735	217140	462463	3583870	477449	585213	260754	347195	188751	501748	141031	458092	394300	520859	2189822	434343	173310	143883	254533	204726	272462	885102
2580	sphinganine	Lipid	Sphingolipid Synthesis	17769	LC/MS Pos Late	313	1413	302.305	3102-56-5	3126	3014	C00836	HMDB00269	180448	213342	322118	290784	154859	77925	177932	209485	190466	218422	216427	116710	385765	177463	192960	209359	290693	346666	171814	167424	254376	206577	92124	207671	119164	325562	304487	214025	157645	125246	131392	203865	230573	212594	147147	195025
2581	sphinganine-1-phosphate	Lipid	Sphingolipid Synthesis	52605	LC/MS Pos Late	100001876	1431	382.272	19794-97-9	520	505		HMDB01383	296830	289275	409283	374876	291075	256896	260430	242756	170528	334510	231284	336196	479547	263128	281880	337531	347730	361912	304733	412925	398027	409215	197836	220612	226324	362095	341070	188066	126546	331729	377381	277361	360533	295466	117745	237399
2731	sphingosine	Lipid	Sphingosines	17747	LC/MS Pos Late	297	1393	300.29	123-78-4	5353955	4510275	C00319	HMDB00252	432749	423803	915271	765672	380332	148006	312075	439368	292990	450574	488076	343201	1022790	447610	426124	635669	635634	920572	414838	392724	450707	611755	226586	423300	268139	991560	548074	381697	278368	284326	339735	411661	452085	662973	248888	396573
2733	sphingosine 1-phosphate	Lipid	Sphingosines	34445	LC/MS Pos Late	100000626	1375	380.256	26993-30-6	5283560	4446673	C06124	HMDB00277	1801895	1553005	2227154	2074989	1582814	1600788	1697812	1495797	1148268	1717828	1366521	2064876	3015373	1942078	1817777	1952574	1823349	2290295	1750692	2279970	1846127	1631110	1022742	1255066	1332545	2197939	1803628	1211046	1051196	1931531	2241188	1582987	1701768	1695858	908196	1749272
1291	stearate (18:0)	Lipid	Long Chain Fatty Acid	1358	LC/MS Neg	439	5872	283.264	57-11-4	5281	5091	C01530	HMDB00827	699078912	644852288	457339040	743248832	626083904	646201920	725892224	881402816	675041472	796435584	445393600	992149312	524361824	657653696	402810944	963170816	695110976	1172757760	663533568	572219584	583711616	660134976	458506048	998901440	481610720	804734784	684615680	743193984	646634240	555890880	651613440	715695488	753216320	775676288	872916672	624043712
1326	stearidonate (18:4n3)	Lipid	Polyunsaturated Fatty Acid (n3 and n6)	33969	LC/MS Neg	100001229	5395	275.202	111174-40-4	5312508	4471933	C16300	HMDB06547	1655020	971956	111258	955268	711324	196760	575141	2278839	689681	1224672	290672	1809492	191630	1445799	545278	4538301	1801739	1802404	279619	383349	791275	196222	276792	619055	191479	743562	1023646	74148	422395	652156	259083	1105579	1546176	1448422	3606048	328218
1580	stearoylcarnitine (C18)	Lipid	Fatty Acid Metabolism(Acyl Carnitine)	34409	LC/MS Pos Late	100001391	1485	428.373	18822-91-8	6426855	21233653		HMDB00848	2616777	1628280	1534035	2501493	1251102	1402814	1715111	2176804	2238645	1350496	1915623	1215438	3370044	1784408	2243795	2114878	1711049	2216249	2189689	1972632	1808129	1237672	940371	2013270	1907998	2053004	2847013	3656697	1507811	1748762	2055600	1079332	1050643	2074067	902044	2370272
1638	stearoylcholine*	Lipid	Fatty Acid Metabolism (Acyl Choline)	57464	LC/MS Pos Late	100015759	1520	370.368						401227	315620	62108	336822	62108	62108	270680	62108	107906	431086	503364	62108	545084	619176	1246671	482572	849266	696578	1559020	443518	456400	62108	62108	1624476	240997	286432	311541	159410	62108	146837	62108	282233	196645	181258	62108	216929
1437	suberate (C8-DC)	Lipid	Fatty Acid, Dicarboxylate	15730	LC/MS Polar	100000016	2577.6	173.082	505-48-6	10457	10025	C08278	HMDB00893	159774	159774	159774	159774	159774	159774	159774	308531	159774	159774	159774	433512	375028	333147	330538	296378	687328	899790	159774	159774	203867	789739	159774	159774	159774	468949	337924	950512	364334	159774	285134	159774	347437	159774	159774	469817
1591	suberoylcarnitine (C8-DC)	Lipid	Fatty Acid Metabolism(Acyl Carnitine)	52990	LC/MS Pos Early	100006627	2964	318.191						54996	81481	54965	54965	145501	54965	119643	54965	173366	54965	54965	356089	157121	54965	155752	54965	151680	326707	186713	100955	54965	310477	141230	215918	54965	117222	147889	84512	251861	193398	315776	169055	54965	212768	151676	90645
2972	taurochenodeoxycholate	Lipid	Primary Bile Acid Metabolism	18494	LC/MS Neg	1629	5250	498.289	6009-98-9	387316	343282	C05465	HMDB00951	601667	113756	1497944	958122	1358029	344522	1121108	297011	189844	618847	182672	121667	2342930	1397379	1665941	60411	6422113	3927782	5153919	838992	1086664	3284871	138998	4080639	729110	506661	162899	249720	1891353	872489	108718	1065638	193715	1907088	873891	700177
3035	taurochenodeoxycholic acid 3-sulfate	Lipid	Secondary Bile Acid Metabolism	62890	LC/MS Neg	100021093	4809	288.62			24850141		HMDB02486	144567	33619	81664	81747	187702	36434	57103	44016	33619	101462	40746	33619	258703	59821	428642	33619	190078	122690	180744	35520	48597	230870	33619	350505	78894	77221	55953	33619	255292	149798	33619	387209	33619	56269	80666	80868
2969	taurocholate	Lipid	Primary Bile Acid Metabolism	18497	LC/MS Neg	1648	5150	514.284	145-42-6	6675		C05122	HMDB00036	315730	21835	273058	292560	470741	74661	211174	61174	31517	250737	21835	21835	703868	181474	712453	21835	1417078	850807	1546595	322837	394173	1342265	89754	972393	89417	71889	95734	25210	403339	437910	21835	483102	43051	650383	554181	215717
3030	taurocholenate sulfate*	Lipid	Secondary Bile Acid Metabolism	32807	LC/MS Neg	100001990	4750	279.614						576172	145676	554247	920629	488652	743192	634078	396354	288666	1724704	409176	455799	688140	299731	1075772	593006	462951	637794	1209050	262984	1133636	2210087	349965	1411990	363067	806377	1138925	673000	2233530	1012475	849668	1268302	145676	338644	221939	527934
2993	taurodeoxycholate	Lipid	Secondary Bile Acid Metabolism	12261	LC/MS Neg	1668	5257.4	498.289	207737-97-1	2733768	2015539	C05463	HMDB00896	1401446	84094	2438116	565510	1280204	554123	499385	530561	552318	1144544	233406	86330	1481570	1009755	1239086	106247	27120	2325878	7569226	896816	1458659	1256456	630490	1211432	747758	27120	369896	402343	3831212	1030927	173535	670322	371140	27120	773487	429446
2994	taurodeoxycholic acid 3-sulfate	Lipid	Secondary Bile Acid Metabolism	62889	LC/MS Neg	100006644	4850	288.62						160506	27714	156808	60969	286314	138131	77245	104398	180721	394240	88923	27714	289408	50184	346291	50207	37420	73114	337665	109476	194513	154344	29678	245945	159765	27714	162305	105122	1289205	164054	122631	255608	70851	27714	90356	73085
3005	taurolithocholate 3-sulfate	Lipid	Secondary Bile Acid Metabolism	36850	LC/MS Neg	100001658	5027	280.622	64936-83-0	440071	389078	C03642	HMDB02580	812708	83665	402622	903907	346296	1729787	199911	2058859	590144	922881	723548	101903	740105	179253	1658328	404892	389041	462329	1853394	296125	1435007	1006713	333875	1792374	862421	49618	1322376	1272775	5669931	2418754	554431	1338383	349949	49618	503738	218885
1457	tetradecadienedioate (C14:2-DC)*	Lipid	Fatty Acid, Dicarboxylate	62918	LC/MS Neg	100021100	3148	253.145						39612	35162	35162	81663	268443	101944	132188	52359	35162	35162	35162	377070	102846	82195	35162	35162	47876	112845	87964	127014	37863	85563	110361	35162	35162	82883	35162	48692	61408	230929	99559	103650	35162	132655	140448	67996
1320	tetradecadienoate (14:2)*	Lipid	Polyunsaturated Fatty Acid (n3 and n6)	62850	LC/MS Neg	100020343	5292	223.17	39039-37-7	5312409	4471834		HMDB00560	3042111	2704127	2223155	6090292	3136140	3504679	3087059	8739751	4310684	2617321	623936	19493310	1593672	3898425	934535	4089492	3890872	5010704	1869476	3243561	2879215	2117672	2909396	4520945	555642	6393885	2453278	1623119	703670	4630275	1142991	2897931	4186748	9733254	6811613	1036526
1449	tetradecanedioate (C14-DC)	Lipid	Fatty Acid, Dicarboxylate	35669	LC/MS Neg	100001613	3985	257.176	821-38-5	13185	12630		HMDB00872	134275	208452	90339	191108	172778	166951	488766	112025	356918	115588	106208	616464	214007	185568	115199	174881	103296	532443	188480	158152	83595	212813	180200	332482	70197	242621	183146	130381	1585964	189385	159699	235230	168246	90479	230769	184985
1448	tridecenedioate (C13:1-DC)*	Lipid	Fatty Acid, Dicarboxylate	62919	LC/MS Neg	100002199	3051	241.145						317755	335380	353080	521017	1582952	389421	437551	483003	449248	278405	272406	885876	576172	698539	295598	534625	187559	387738	511322	208192	157005	601678	489083	218023	344910	892502	774793	746395	891013	595486	356606	391215	83439	673791	157178	401980
1880	trimethylamine N-oxide	Lipid	Phospholipid Metabolism	40406	LC/MS Pos Early	100003397	2100	76.0757	1184-78-7	1145	1113	C01104	HMDB00925	20028874	12337078	6402657	22974264	13941670	13621430	4888756	15974480	28417146	13138308	7323094	5460259	6496989	11278099	24027568	10762978	18107122	8640689	16781462	7923089	9911681	4666257	3551495	4773267	8546696	3527983	13717660	15552512	14530923	4964858	7257654	11501814	12394114	10501031	10545420	11225036
3007	ursodeoxycholate	Lipid	Secondary Bile Acid Metabolism	1605	LC/MS Neg	1135	5055	391.285	128-13-2	31401	29131	C07880	HMDB00946	380845	8828922	391935	105317	180520	532161	1031016	865350	1318802	45081	67675	363602	86508	1425148	45081	268222	309049	409203	134647	327958	444734	233238	186360	108967	213568	187846	222200	229535	830302	219580	578304	233858	528091	3716432	91631	443977
3037	ursodeoxycholate sulfate (1)	Lipid	Secondary Bile Acid Metabolism	52970	LC/MS Neg	100009261	4328	235.117						50727	63995	21771	21771	52236	68968	90099	104441	77376	21771	32836	51426	21771	39598	33574	172879	21771	21771	29118	93716	45431	33497	112349	21771	46730	21771	110177	21771	578816	42634	21771	21771	21771	21771	21771	21771
1268	valerate (5:0)	Lipid	Short Chain Fatty Acid	33443	LC/MS Neg	1136	1718	101.061	109-52-4	7991	7701	C00803	HMDB00892	1107643	1136595	1060233	1222244	606211	841409	1412139	1756465	1179315	742155	1960188	784747	166049	1139281	587357	569633	1321384	825879	583627	460281	1648184	1297434	695080	699963	480304	1303957	241069	323724	450322	1179926	1049630	1189699	1296221	995539	1043704	166049
1615	ximenoylcarnitine (C26:1)*	Lipid	Fatty Acid Metabolism(Acyl Carnitine)	57517	LC/MS Pos Late	100015836	1607	538.483						443508	340319	473390	328502	492037	222209	157591	439433	540729	381225	327519	184710	687973	305213	541549	543283	755551	501350	363989	463296	236471	157591	317351	425859	280890	371703	602042	668974	438654	456071	368968	260482	414111	263672	205791	444884
3716	2'-deoxyuridine	Nucleotide	Pyrimidine Metabolism, Uracil containing	1412	LC/MS Neg	536	1586	111.02	951-78-0	13712	13118	C00526	HMDB00012	96326	91790	62052	44332	70794	166471	57805	44332	71558	69105	44332	60710	44332	44332	44332	44332	44332	44332	44332	81896	123303	74826	44332	44332	77967	44332	44332	63731	44332	71642	64910	44332	72520	56208	44332	44332
3742	2'-O-methylcytidine	Nucleotide	Pyrimidine Metabolism, Cytidine containing	57554	LC/MS Pos Early	100010895	2411	258.108	2140-72-9	150971	133067			52004	139195	138978	52004	210018	97976	226481	179236	207687	52004	52004	52004	298007	248667	52004	115660	258953	323625	52004	233337	144985	111770	188027	52004	52004	384852	52004	202066	155557	52004	130022	52004	52004	183784	52004	162820
3704	2'-O-methyluridine	Nucleotide	Pyrimidine Metabolism, Uracil containing	57655	LC/MS Neg	100010896	1831	257.078	2140-76-3	102212	92343			77999	77099	113780	82200	66286	123632	102513	94075	89129	79280	61486	113779	68088	83718	64947	46426	51256	94681	62050	49793	38337	82767	22524	49729	54482	83076	85737	116199	70296	94574	87928	91698	93517	89226	52962	70836
3756	3-aminoisobutyrate	Nucleotide	Pyrimidine Metabolism, Thymine containing	1566	LC/MS Pos Early	1114	2190	104.071	10569-72-9;214139-20-5	64956	58481	C05145	HMDB03911	6018701	3378839	10243485	8288864	6143991	9795357	6745112	16278406	11342572	8905850	5002724	10980278	26895012	13057906	26337528	6682384	10363899	15552509	5793677	12235692	7330185	5036394	8258562	8187476	10403915	7230277	8919280	7013764	12657551	8541366	17839620	4611775	2558324	5906365	4902031	6336347
3733	3-methylcytidine	Nucleotide	Pyrimidine Metabolism, Cytidine containing	35132	LC/MS Pos Early	100001466	2176	258.108	21028-20-6	159649	9164190			43972	43972	131716	96028	64271	138872	43972	50854	43972	80586	43972	100751	76541	170398	43972	82613	67358	43972	43972	51180	43972	85140	43972	118497	88432	43972	78603	43972	68481	73235	91831	43972	64346	43972	43972	43972
3719	3-ureidopropionate	Nucleotide	Pyrimidine Metabolism, Uracil containing	3155	LC/MS Pos Early	1053	875	133.061	462-88-4	111	109	C02642	HMDB00026	180240	159547	189503	237779	122305	190954	234095	178127	154306	173786	167782	199207	236882	183388	204809	204744	550747	507244	125135	274131	226261	332727	204682	136339	137581	239619	97001	234576	215787	377457	245995	160671	200099	265369	111394	128995
3754	5,6-dihydrothymine	Nucleotide	Pyrimidine Metabolism, Thymine containing	1418	LC/MS Neg	158	1637.8	127.051	696-04-8	93556	84456	C00906	HMDB00079	255114	202303	291651	331905	195892	221725	341665	237035	269594	266299	273448	239690	233831	194091	247420	295560	285262	225420	178282	227994	237419	194454	197631	222799	197711	341911	254007	420156	352193	293559	294965	292401	280214	327978	170111	166263
3712	5,6-dihydrouracil	Nucleotide	Pyrimidine Metabolism, Uracil containing	1559	LC/MS Neg	1125	1120	113.036	504-07-4	649	629	C00429	HMDB00076	199899	116604	196065	186298	60176	159809	191869	146158	60176	162395	60176	185609	188507	138715	111289	206350	121745	136441	60176	168622	126287	171119	148529	151701	60176	238672	148600	92435	60176	143040	179340	131548	200843	189942	60176	87693
3703	5,6-dihydrouridine	Nucleotide	Pyrimidine Metabolism, Uracil containing	61833	LC/MS Neg	100001425	1119	245.078	5627-05-04	94312	85115			1374715	1030288	1191239	1267898	1104639	915500	1436089	1086561	1213602	1112017	858238	1265007	1221802	985078	1062865	1130208	940591	1568870	1145129	1271813	1099400	922848	739987	1099146	1044240	1167359	1576900	1152356	1045318	1412332	1165491	1713005	1096113	1032533	747184	1082629
3705	5-methyluridine (ribothymidine)	Nucleotide	Pyrimidine Metabolism, Uracil containing	35136	LC/MS Neg	100001446	1778.1	257.078	1463-10-1	445408	393058		HMDB00884	413250	553428	526653	436534	466953	434995	455914	548437	521666	322661	429761	511490	641865	510839	475866	437593	438891	495716	587339	518171	567578	287665	247798	266460	549758	548362	700001	677446	471706	596350	457949	509001	370787	383580	305600	515504
3669	7-methylguanine	Nucleotide	Purine Metabolism, Guanine containing	35114	LC/MS Pos Early	100001456	2175	166.072	578-76-7	11361	10883	C02242	HMDB00897	1852212	1472204	2110193	1857751	1916457	1449344	1743729	1651483	1733398	1858480	1183637	1571600	2373794	1862841	2225440	1908710	1535183	2433359	1544354	2375802	1607577	1604796	1716128	1762015	1275121	2005317	1602709	1609142	1736335	2304160	1986004	1814173	1408600	2458351	1663132	1792944
3633	adenine	Nucleotide	Purine Metabolism, Adenine containing	554	LC/MS Pos Early	880	2221	136.062	73-24-5	190	185	C00147	HMDB00034	184970	169526	249462	286319	177085	241182	182213	241803	252005	348890	594364	269732	284186	281168	293684	353524	718350	246996	248628	207112	433252	147787	149443	339522	272776	231064	323127	298620	214554	272887	265090	402251	281359	260099	141402	213786
3625	adenosine 5'-monophosphate (AMP)	Nucleotide	Purine Metabolism, Adenine containing	32342	LC/MS Pos Early	209	1013	348.07	149022-20-8	6083	10239183	C00020	HMDB00045	2120731	2608931	6930781	1267802	1309157	254964	994493	2906612	779133	641604	2864310	2683692	1248980	969249	853673	1593203	1226931	1707623	810191	1009389	1002438	1625702	433711	913415	573698	2728513	1347109	1189154	804055	784991	1909926	519042	1238141	1621692	816056	1132142
3619	allantoin	Nucleotide	Purine Metabolism, (Hypo)Xanthine/Inosine containing	1107	LC/MS Pos Early	1002	685	159.051	97-59-6	204	199	C02350	HMDB00462	840432	805360	641093	600409	845981	420032	889260	670923	731214	793861	640567	470540	1041154	655315	587126	629777	806220	785483	508034	796409	783273	824447	817581	739968	516774	1044902	927862	1031672	711609	545413	714520	505456	631599	491674	301142	722013
3720	beta-alanine	Nucleotide	Pyrimidine Metabolism, Uracil containing	55	LC/MS Pos Early	244	1905	90.055	56-41-7;107-95-9	239	234	C00099	HMDB00056	5926740	5823979	8320763	6535042	6572747	5631854	4767095	8583051	8372981	5482571	7033181	6703303	10754089	8095158	7626201	9304145	5586116	5123281	4333262	5703368	12614547	6436979	4201937	5521883	6170823	8861920	6418969	6025750	6132801	7468588	5237050	4718208	5358232	9175867	3815017	6946028
3731	cytidine	Nucleotide	Pyrimidine Metabolism, Cytidine containing	514	LC/MS Neg	827	1325	242.078	65-46-3	6175	5940	C00475	HMDB00089	37032	22235	45079	16617	16617	16617	42560	37452	45105	29458	16617	31524	39912	51149	45133	45254	31506	57219	16617	16617	40398	45117	16617	59380	29076	31433	26727	35638	16617	40581	28651	39578	34070	16617	16617	16617
3732	cytosine	Nucleotide	Pyrimidine Metabolism, Cytidine containing	573	LC/MS Pos Early	881	2060	112.051	71-30-7	597	577	C00380	HMDB00630	168084	85684	185910	225764	116169	225639	229814	239388	188505	219866	136117	117889	219785	156084	286022	253607	251231	150331	138296	217959	342300	274177	115827	138272	262096	205332	145262	206424	296982	111840	328148	68567	131348	85009	69714	155524
3687	dihydroorotate	Nucleotide	Pyrimidine Metabolism, Orotate containing	601	LC/MS Polar	923	1910	157.025	155-54-4	648	628	C00337	HMDB03349	2364860	2764287	1595305	1557459	1905435	1840728	1814417	1414578	1583985	2368534	1414029	4296561	1075634	2178596	4763028	1535912	1409674	1076875	1533682	2189555	1496278	744922	1945681	849480	951982	1497456	1934797	1186940	1512412	2575767	1447614	1458485	1918808	2201122	954218	1932929
3608	hypoxanthine	Nucleotide	Purine Metabolism, (Hypo)Xanthine/Inosine containing	3127	LC/MS Neg	171	1291.2	135.031	68-94-0	790	768	C00262	HMDB00157	7807760	6674016	13145916	6573988	5632567	11177554	4768040	8547478	2131295	4176927	3172323	8802357	5180134	5135853	1846866	9778301	3772828	4367815	4361449	5340258	14404503	9906944	3082436	1590427	2350741	8932699	5408165	2227822	4788833	4311633	8053952	6367357	4179356	5579909	2904009	3381608
3607	inosine	Nucleotide	Purine Metabolism, (Hypo)Xanthine/Inosine containing	1123	LC/MS Neg	361	1602.1	267.073	58-63-9	6021	21241953	C00294	HMDB00195	269148	340956	1239867	382105	113113	675234	160192	906524	48014	75556	130531	383878	118168	268169	78298	1104311	127678	120542	200891	150293	3947526	593473	184417	29713	28293	411163	155698	28293	155147	85977	539770	427993	393381	275433	78384	96582
3721	N-acetyl-beta-alanine	Nucleotide	Pyrimidine Metabolism, Uracil containing	37432	LC/MS Neg	100002102	773	130.051	3025-95-4	76406	68881	C01073		96170	259588	224418	219559	321363	247559	193806	487430	219296	456358	130153	294106	371092	258083	183583	273307	152422	323307	258307	334456	430631	240342	169787	461542	209688	219493	158014	384632	192885	259824	261442	215321	160033	136522	164602	280812
3638	N1-methyladenosine	Nucleotide	Purine Metabolism, Adenine containing	15650	LC/MS Pos Early	1242	2120	282.12	15763-06-1	27476	4573813	C02494	HMDB03331	1167350	744684	1182997	1042919	988077	955981	1148062	1418817	1085502	1396760	1004961	1340549	1591285	1320119	1033965	1192250	656080	1559654	1012613	1092606	1065309	909663	666269	915586	1033707	938361	1407225	1613846	1275229	1110513	935966	1265912	1096466	1192951	706134	1031421
3614	N1-methylinosine	Nucleotide	Purine Metabolism, (Hypo)Xanthine/Inosine containing	48351	LC/MS Pos Early	100001409	1430	283.104	20245-33-4	65095	513976		HMDB02721	748129	624928	626670	763093	1070712	95985	819926	374729	338637	575885	523420	573757	737533	554816	578757	680397	448819	649165	688608	890908	1040676	266247	511584	209496	530190	881822	1078885	344580	830462	433644	491595	681059	448718	784414	413885	759656
3675	N2,N2-dimethylguanosine	Nucleotide	Purine Metabolism, Guanine containing	35137	LC/MS Pos Early	100001412	2210	312.13	2140-67-2	92919	83878		HMDB04824	742883	557334	745016	774400	899102	547971	685677	779724	660630	774100	660759	725950	854933	800849	647754	932185	482025	853365	641004	772346	762567	581037	507971	580572	544581	776823	954478	669255	887022	703582	676619	805359	742327	1062141	562378	703048
3735	N4-acetylcytidine	Nucleotide	Pyrimidine Metabolism, Cytidine containing	35130	LC/MS Pos Early	100001413	1580	286.103	3768-18-1	107461	96702		HMDB05923	659365	408912	731943	448742	529976	277735	542793	511581	411639	354080	119530	472741	582916	290884	438388	875243	317166	822299	327161	595159	347810	1050739	232739	636297	296512	793456	519242	242603	388703	459345	500209	760413	292863	266429	487810	591996
3648	N6-carbamoylthreonyladenosine	Nucleotide	Purine Metabolism, Adenine containing	35157	LC/MS Neg	100001415	2164	411.127	24719-82-2	161466	141829		HMDB41623	75363	60769	59691	55942	77207	37967	65145	49765	51349	60765	51965	65685	67225	63805	68516	72078	42962	87528	58957	75058	57821	53644	49447	46817	54974	65269	85321	79025	62062	59107	45220	71000	44109	70666	42843	71474
3688	orotate	Nucleotide	Pyrimidine Metabolism, Orotate containing	1505	LC/MS Polar	445	1638.1	155.01	50887-69-9	967	942	C00295	HMDB00226	4614717	3433053	5592359	5047262	3629796	3528389	3977124	3785224	6526376	3909854	3661077	2707474	7374746	6335928	3864649	4517366	2501912	4793708	4347856	4927351	3316144	3646198	4256263	2757608	3579658	2800043	4514792	15384456	4682093	4263529	5994577	2275200	3626201	3362752	3500315	3052588
3690	orotidine	Nucleotide	Pyrimidine Metabolism, Orotate containing	35172	LC/MS Polar	100001416	2250	287.052	314-50-1	92751	83729		HMDB00788	1451607	721140	1373605	1342822	1578287	1247238	1410831	1513494	1315268	1738966	1140027	841445	1470152	550630	1714522	1924250	803027	1772003	957688	1239333	1407469	1106840	1071321	350969	373280	1269929	1845560	1690219	1253230	1261096	1596304	1324135	1481643	1223311	1252602	1283487
3702	pseudouridine	Nucleotide	Pyrimidine Metabolism, Uracil containing	33442	LC/MS Neg	821	1100	243.062	1445-07-4	15047	21403010	C02067	HMDB00767	4563426	3584163	4091620	4038167	3803807	3370121	4899649	4059132	4280638	3941708	3181580	4314060	4126583	3730047	3936750	3862726	3560974	4983906	3852658	4285358	3881283	3079540	2780797	3387465	3258580	4360737	4804808	4315097	3932402	4379097	4295883	4875854	3701435	3814083	3044412	3773241
3701	uracil	Nucleotide	Pyrimidine Metabolism, Uracil containing	605	LC/MS Polar	825	1089.7	111.02	66-22-8	1174	1141	C00106	HMDB00300	935070	631130	807887	1231934	448960	807176	398183	1232301	533319	685625	601078	984929	716455	501963	801565	1227545	697330	701795	540242	1180949	835630	1594384	427461	414499	423866	768467	539754	473257	596303	505365	826073	664685	991875	828599	237583	671968
3617	urate	Nucleotide	Purine Metabolism, (Hypo)Xanthine/Inosine containing	1604	LC/MS Neg	1134	757.1	167.021	69-93-2;120K5305	1175		C00366	HMDB00289	221795264	123859344	144313792	126763696	199419616	146323792	138115328	165529888	147215984	122574248	129383312	162598992	121006352	153088272	126657816	194106896	109167072	203188816	139204352	158957088	155821312	116444136	106401440	138978352	99021288	165632784	231088496	159566160	169674752	127061576	164130880	188638368	125621408	190690880	127233752	124723680
3700	uridine	Nucleotide	Pyrimidine Metabolism, Uracil containing	606	LC/MS Neg	535	1457.6	243.062	58-96-8	6029	5807	C00299	HMDB00296	15910426	14123803	17279924	17862236	10645778	26355342	15957754	21744160	8449389	9146123	8438012	24867602	14824917	14247024	10381375	21474612	17420054	15929509	13331604	22426110	18646360	14243380	10242395	11456362	9597608	20787028	10794883	9790993	12945861	19747494	17876976	14937790	15296559	18245316	6307950	14378232
3609	xanthine	Nucleotide	Purine Metabolism, (Hypo)Xanthine/Inosine containing	3147	LC/MS Polar	1004	2023	151.026	69-89-6	1188	1151	C00385	HMDB00292	27554884	19084350	39580020	23611662	11488117	41873112	17339144	22665980	5436459	15054283	12685889	25793580	9479205	13421963	9037883	37509284	9830379	16759343	17329510	18056288	44425768	26493256	12463574	8592605	7420990	25957902	17114528	9075166	13241238	13505928	37312028	24037588	15368395	40770644	9452095	10641115
5196	glucuronide of C10H18O2 (7)*	Partially Characterized Molecules	Partially Characterized Molecules	61887	LC/MS Neg	100020014	3790	345.156						2457500	59734	28432	28432	28432	28432	28432	187411	1178322	28432	28432	28432	137843	28432	28432	392353	177654	28432	28432	28432	28432	28432	28432	28432	28432	28432	28432	28432	28432	28432	28432	28432	28432	28432	28432	28432
5230	metabolonic lactone sulfate	Partially Characterized Molecules	Partially Characterized Molecules	63153	LC/MS Neg	100021331	4802	427.216						345179	68319	148670	116969	563933	103081	141610	125266	142276	87395	142409	89025	218896	148247	72553	692300	69957	133994	167267	196769	91044	248847	98634	60008	33559	31323	436446	102254	130497	85144	118158	956592	69880	268235	101263	196630
990	4-hydroxyphenylacetylglutamine	Peptide	Acetylated Peptides	55017	LC/MS Neg	100010850	1650	279.099						131741	27159	19019	34260	45830	19019	46964	19019	34975	24915	22348	19019	19019	110410	86988	124500	30724	145908	19019	19019	28386	19019	19019	19019	19019	19019	63584	42293	19019	19019	19019	25500	63615	70497	211704	42272
961	Fibrinopeptide A (2-15)**	Peptide	Fibrinogen Cleavage Peptide	62809	LC/MS Neg	100020902	2120	653.266						124091	164940	217632	57444	19885	1537022	30016	199331	19885	19885	19885	63736	19885	53790	96941	980412	19885	19885	43478	131290	3972857	22175	80381	19885	19885	39852	19885	19885	19885	19885	1176404	46581	396019	115958	19885	19885
964	Fibrinopeptide A (3-16)**	Peptide	Fibrinogen Cleavage Peptide	62811	LC/MS Neg	100020903	2786	673.803						69228	250104	371087	62134	17697	2497994	80944	90265	17697	17697	91860	242446	17697	73531	90443	701232	17697	55539	117149	217112	1327041	143184	119823	17697	17697	158125	36821	70262	17697	17697	1974857	156673	222956	75136	61880	89256
960	Fibrinopeptide A*	Peptide	Fibrinogen Cleavage Peptide	57709	LC/MS Neg	100001322	2474	766.835	25422-31-5	16133137	14654187			728735	358581	2046670	564333	60560	2685856	622722	616535	305210	16114	1131388	959818	76961	362680	710156	1468029	182909	366870	755638	402373	1250634	219507	322574	37226	268495	571220	54546	1344504	367686	24077	2833505	2003158	876741	345500	724591	783785
968	Fibrinopeptide A, des-ala(1)*	Peptide	Fibrinogen Cleavage Peptide	31548	LC/MS Neg	100001323	2535	731.317			21403111			650241	723249	3984674	300636	33162	6632025	842107	781810	147569	33162	685758	711686	33162	406633	388146	1479703	127076	326889	783174	379978	5939686	242485	495804	33162	90300	464314	72770	1187661	166162	33162	8750563	1188278	1110577	369675	564056	586737
969	Fibrinopeptide A, phosphono-ser(3)*	Peptide	Fibrinogen Cleavage Peptide	57712	LC/MS Neg	100001324	2016	806.818	886023-52-5		21403112			120329	98343	923412	172982	29436	1961403	22151	293622	22151	45753	120775	281880	22151	53386	149163	898331	40382	76368	230542	146378	1217947	64186	43412	22151	32823	22151	35937	185047	43131	22151	2978677	440579	145019	109914	113835	54082
981	Fibrinopeptide B (1-11)**	Peptide	Fibrinogen Cleavage Peptide	62815	LC/MS Neg	100020912	2389	411.489						246144	197796	159482	185701	23063	2115412	23063	331582	23063	23063	23063	131934	23063	85280	91699	1691871	57903	23063	23063	399562	5300553	272258	124928	23063	23063	68305	76063	23063	23063	23063	941368	45614	447019	139010	26514	23063
983	Fibrinopeptide B (1-13)**	Peptide	Fibrinogen Cleavage Peptide	62813	LC/MS Neg	100020908	2482	696.772						401924	531670	1938648	238864	32366	4916468	449404	473330	70473	32366	310475	470631	32366	243036	226024	1687322	95054	168684	291346	301644	4248499	218489	332610	32366	51001	435016	54534	426916	69339	32366	5872188	659325	539664	307526	163561	304530
525	gamma-glutamyl-alpha-lysine	Peptide	Gamma-glutamyl Amino Acid	55015	LC/MS Pos Early	100010901	2784	276.155		65254	58747			672242	539566	687892	896440	834237	819051	706032	741960	1314211	676394	882672	845893	1280401	1085291	591798	917912	781549	608245	1023058	619782	824377	548486	651075	404729	882883	486999	1121489	889042	881831	461021	755685	826245	975891	773182	467106	833459
526	gamma-glutamyl-epsilon-lysine	Peptide	Gamma-glutamyl Amino Acid	33934	LC/MS Pos Early	100001262	2725	276.155	17105-15-6	7015685	5378717		HMDB03869	230068	228297	226241	309412	318338	183128	232065	180624	273583	220784	250704	125323	289563	320261	216586	307834	321655	170964	198252	168216	286318	145418	358496	147195	234764	148740	343495	205876	268951	154216	312020	261791	333607	202260	265688	279434
517	gamma-glutamylalanine	Peptide	Gamma-glutamyl Amino Acid	37063	LC/MS Pos Early	100001843	1986	219.098	5875-41-2	440103	389104		HMDB29142	492087	535729	362615	459712	393061	111455	233771	178035	294960	156424	493483	118214	512615	258886	151494	406351	1333772	226655	633297	431914	428205	203364	1805168	487630	518400	269787	296900	186123	391128	314050	411777	344293	257410	688292	1210526	296545
534	gamma-glutamylcitrulline*	Peptide	Gamma-glutamyl Amino Acid	62104	LC/MS Pos Early	100020241	1644	305.146						1635250	1537087	1412644	2007624	1693251	2488910	2160223	2446779	1493461	1535313	1947208	1996484	2951263	3487168	2461688	1813471	2630565	2111769	1577843	1719633	2888364	859356	1709644	1686263	2026432	1578286	2569081	1860123	1663756	1935714	1894143	1327072	1867704	2396839	1401369	1986436
519	gamma-glutamylglutamate	Peptide	Gamma-glutamyl Amino Acid	36738	LC/MS Pos Early	331	1775	277.103	1116-22-9	92865	83831	C05282	HMDB11737	581029	331079	321279	431855	981389	502233	367960	782313	423829	371878	817549	544711	399579	543739	416326	841119	396166	622660	408501	306501	733544	606135	468777	262896	198517	335494	1087853	450375	590562	445466	886988	711609	579758	646572	259404	441987
520	gamma-glutamylglutamine	Peptide	Gamma-glutamyl Amino Acid	2730	LC/MS Pos Early	1140	1430	276.119	10148-81-9	150914	133013	C05283	HMDB11738	27222348	34075220	30041048	40811328	22923496	26222496	36531148	29357722	24850142	27491428	31543010	25037076	44459504	36994440	29942954	35350784	30054784	36058880	24361548	33389132	29979960	25224312	33688600	26242066	26357124	29051038	35257452	28961048	33373744	33264114	29634932	18618436	39593980	31830030	18598982	29413904
521	gamma-glutamylglycine	Peptide	Gamma-glutamyl Amino Acid	33949	LC/MS Pos Early	100001294	1535	205.082	1948-29-4	165527	145071		HMDB11667	1071937	2121943	1723233	2382125	1140527	1179057	2387864	1683403	3388485	821930	1457407	1703137	2289133	2840346	1441324	1409241	2254442	2450395	1838688	3372081	1143800	629346	1610698	272499	1012886	2210939	1179059	1516718	1565197	1474013	2626718	1156354	1843603	992741	860356	1923091
522	gamma-glutamylhistidine	Peptide	Gamma-glutamyl Amino Acid	18245	LC/MS Pos Early	1235	2740	285.119	37460-15-4	7017195	5380197			220674	382762	240048	338491	293747	157754	167302	185221	235691	203045	310489	120095	210720	178071	213686	227562	303281	209181	234798	227101	340948	109832	253685	285735	216005	229783	231401	202757	270671	190753	267194	297030	233364	296950	247939	232672
523	gamma-glutamylisoleucine*	Peptide	Gamma-glutamyl Amino Acid	34456	LC/MS Pos Early	100001485	2940	261.144		14253342	21403145		HMDB11170	522174	265344	340687	305259	574476	246203	275508	592053	601885	424171	640035	437067	460232	494498	395701	420119	165075	333284	345979	412427	334961	313305	293594	224677	394339	209043	699902	547427	403093	380809	435043	494860	334645	451430	305172	521927
524	gamma-glutamylleucine	Peptide	Gamma-glutamyl Amino Acid	18369	LC/MS Pos Early	1268	2991	261.144	2566-39-4	151023	133115		HMDB11171	361121	281167	264782	280650	553843	326951	286201	486766	736716	329721	587483	340000	405558	405640	403191	350127	283719	226577	421335	391885	397564	283373	256631	217985	446571	294492	652357	507033	366256	390882	420150	398895	336564	410671	223310	469617
527	gamma-glutamylmethionine	Peptide	Gamma-glutamyl Amino Acid	44872	LC/MS Pos Early	100001313	2640	279.101	17663-87-5	7009567	5373147		HMDB29155	766663	525791	952380	894177	798889	822180	641736	840691	1377630	1194443	1067406	769160	1863224	1385524	605288	794377	788492	1020500	1388018	1152000	816744	581895	780901	496739	1508694	632036	1180133	978525	1042902	819995	852892	952440	814574	1005788	803508	820320
528	gamma-glutamylphenylalanine	Peptide	Gamma-glutamyl Amino Acid	33422	LC/MS Pos Early	100000491	2992	295.129	7432-24-8	111299	99868		HMDB00594	165339	93207	179819	144439	233689	115820	175112	191303	224654	193784	148543	125053	190090	130692	180127	109520	100758	116677	219749	220220	133714	150002	136520	75943	127327	245941	213137	208637	110990	115931	144387	204520	135206	158735	161615	131576
529	gamma-glutamylthreonine	Peptide	Gamma-glutamyl Amino Acid	33364	LC/MS Pos Early	100001314	1750	249.108	5652-48-2	76078708	21403107		HMDB29159	2147390	1149873	1987000	2051957	1951419	1504715	1805009	1945119	3751855	2014512	2672491	1878534	2466275	3321033	1773027	1192771	1708912	1756618	1816870	1312407	2064589	791003	2067895	1546653	2322794	635595	2317370	1658928	2360197	1553181	2654887	2161277	1498878	2901558	1879857	1854484
530	gamma-glutamyltryptophan	Peptide	Gamma-glutamyl Amino Acid	33947	LC/MS Pos Early	100001295	2975	334.14	66471-20-3	3989307	2302065		HMDB29160	49079	30040	56927	30040	46487	30040	39717	88131	53624	30040	60903	72116	114909	101583	30040	30040	47450	30040	30040	52896	30040	30040	30040	30040	63312	59894	57679	77293	30040	50330	67419	62735	30040	75397	53197	71311
531	gamma-glutamyltyrosine	Peptide	Gamma-glutamyl Amino Acid	2734	LC/MS Neg	1102	1240	309.109	7432-23-7	94340	85142		HMDB11741	146701	51953	99594	83532	146352	60043	60334	95955	159771	82896	93719	63989	186532	142419	72844	92721	61417	103171	110212	103434	92851	50098	35641	34514	105335	60634	162367	130429	98919	78886	89982	117502	84437	128466	76541	129745
532	gamma-glutamylvaline	Peptide	Gamma-glutamyl Amino Acid	43829	LC/MS Pos Early	100001126	2700	247.129	2746-34-1	7015683			HMDB11172	1712940	1144279	633398	574064	992197	717705	378216	1151871	2332033	1705261	1624458	333944	1153930	1608947	794292	1640995	333944	1557698	1490068	460284	1725183	1212995	892485	955630	1625614	333944	2904733	333944	1807287	333944	1000970	2055969	808302	2006936	1141279	1993265
911	leucylglutamine*	Peptide	Dipeptide	48189	LC/MS Pos Early	100003183	2620	260.161		4305457	3511125		HMDB28927	67780	72214	155757	179137	25993	328392	25993	74311	25993	25993	25993	39770	49229	25993	44767	281996	25993	59266	25993	142225	773230	37261	25993	25993	25993	25993	25993	25993	25993	25993	183902	28748	76598	58353	25993	25993
744	leucylglycine	Peptide	Dipeptide	40045	LC/MS Pos Early	100003185	2778	189.123	686-50-0	79070	71402		HMDB28929	106747	101033	98499	117170	29046	184329	77825	29046	29046	46582	29046	64425	106924	29046	29046	163519	89279	53786	57247	137571	371926	60967	29046	29046	29046	83857	29046	29046	29046	29046	84025	29046	62427	29046	29046	42412
985	phenylacetylcarnitine	Peptide	Acetylated Peptides	48425	LC/MS Pos Early	100006108	3092	280.154	287108-21-8	101724840				1229204	587071	43966	410847	377736	1192466	210361	1270043	155524	577597	140431	339615	116885	249452	264133	480927	527120	405635	352448	43966	879093	307269	43966	43966	1033212	43966	1454929	1562304	328636	168255	758369	353783	1072765	266136	81398	1547674
987	phenylacetylglutamate	Peptide	Acetylated Peptides	52925	LC/MS Polar	100009045	2325	264.088		11579826	9754592		HMDB59772	466998	323707	82434	82434	82434	82434	144182	865392	535645	82434	102707	82434	82434	145316	221924	124753	130533	261281	82434	152298	284092	82434	82434	82434	123649	213105	514450	478955	118281	82434	82434	118483	314152	82434	108909	374072
988	phenylacetylglutamine	Peptide	Acetylated Peptides	35126	LC/MS Neg	100001417	2330	263.104	28047-15-6	92258	270643	C04148	HMDB06344	12174175	11822877	950384	7064271	4877210	4330279	5859716	12562342	5899552	5595443	5716905	4931254	1300928	4157884	5420119	6152559	9313409	10732816	5428278	5397437	12370039	1318513	1112534	783405	9162605	817226	13696131	9470649	8859855	5550480	6870461	4878215	12562898	6156726	2075805	11092369
793	phenylalanylalanine	Peptide	Dipeptide	41374	LC/MS Pos Early	100003589	2909	237.123	3918-87-4	5488196	4589716			226894	235930	356246	234507	112722	317646	172540	284756	217179	170073	177895	274012	219681	225926	162426	302711	125220	221191	151064	222813	232536	188264	99073	148963	123895	180674	131585	200465	130618	230284	183357	154770	202167	189940	89638	174071
797	phenylalanylglycine	Peptide	Dipeptide	41370	LC/MS Pos Early	100003588	2898	223.108	721-90-4	98207	88678		HMDB28995	139454	106985	139512	143516	61771	142062	104338	132979	84686	78512	90017	135574	134959	115859	93074	155377	63589	135371	121514	122446	180285	99749	56808	78253	56808	119855	83697	109643	56808	113243	102163	56808	122221	56808	56808	90314
898	valylglycine	Peptide	Dipeptide	40475	LC/MS Pos Early	100003641	2444	175.108	686-43-1	136487	120256		HMDB29127	393664	393664	393664	393664	393664	393664	393664	393664	393664	393664	393664	393664	393664	393664	393664	393664	393664	393664	393664	393664	393664	393664	393664	393664	393664	393664	393664	393664	393664	393664	393664	393664	393664	393664	393664	393664
901	valylleucine	Peptide	Dipeptide	39994	LC/MS Pos Early	100003210	3138	231.17	22906-55-4	352039	312586		HMDB29131	228734	160444	259182	268520	63291	234267	154195	156934	89055	103758	63916	159739	225122	132303	75107	195835	49614	199580	104922	338044	295744	162156	54402	62229	43894	56072	110055	138037	91260	138112	163939	132949	149889	152573	43894	117784
4552	1H-indole-7-acetic acid	Xenobiotics	Bacterial/Fungal	57783	LC/MS Neg	100004601	2862	174.056	39689-63-9		13535457			168487	112680	47757	77868	15385	59541	15385	170624	101490	113038	15385	15385	15385	15385	63718	97699	47730	15385	85775	15385	49027	42282	23223	15385	98424	15385	15385	85324	58403	15385	35779	113263	57768	15385	15385	15385
4523	lactobacillic acid	Xenobiotics	Bacterial/Fungal	63048	LC/MS Neg	100021065	5822	295.264	503-06-0	10417	9988			1076024	1137943	347709	1038416	1245535	655583	935006	1414458	766074	1099172	471680	1990600	386152	1096949	254895	1498566	730071	1824412	378845	350843	532625	815261	668972	1177418	340016	2009570	1578335	495410	1631766	751987	740136	1259969	943494	1151587	1493872	384812
4553	N-methylpipecolate	Xenobiotics	Bacterial/Fungal	47101	LC/MS Pos Early	100005383	1932	144.102	41447-17-0	11286529	9461516			6862429	4755688	13698839	15280984	10229601	13469519	15161385	22130128	15088682	13761225	10011456	8108149	18391740	6030245	17540888	6387560	8250410	18716124	10728709	10353669	12751593	3410174	3907205	13268047	8494630	6692894	4632390	9596949	22213150	15217674	22508676	7870532	8231554	6489578	4247603	14982048
3916	2-hydroxyhippurate (salicylurate)	Xenobiotics	Benzoate Metabolism	18281	LC/MS Neg	1869	2184	194.046	487-54-7	10253	9835	C07588	HMDB00840	4015082	995924	37266	37266	122451	37266	55907	148243	108108328	362642	49017	37266	37266	37266	951446	37266	874617	60206868	407159	286643	37266	46299	37266	37266	37266	271310	19082952	136899	231088	37266	37266	37266	37266	37266	37266	20408316
4001	3-(3-hydroxyphenyl)propionate	Xenobiotics	Benzoate Metabolism	35635	LC/MS Neg	100001624	1980	165.056	621-54-5	91	89	C11457	HMDB00375	109968	622921	198002	123152	109968	150343	1529993	109968	109968	109968	109968	109968	243973	1036545	109968	138914	326861	1018054	109968	1940347	109968	303120	1196377	1409514	109968	343685	393065	1959159	5175799	109968	163331	899910	109968	377184	109968	166789
3918	3-hydroxyhippurate	Xenobiotics	Benzoate Metabolism	39600	LC/MS Neg	100002122	1687	194.046	1637-75-8	450268	396603		HMDB06116	318777	900644	233810	161683	175085	101303	1919720	87600	165343	46010	135127	164497	365880	1264827	249346	464046	327500	651696	687584	1317192	181045	186162	770937	707130	46010	398515	806622	1458364	3389099	200615	310695	1414162	172886	559201	117850	200753
3978	3-methoxycatechol sulfate (1)	Xenobiotics	Benzoate Metabolism	48763	LC/MS Neg	100006375	2163	218.997						149673	212018	170701	962651	129687	579040	848396	704515	331189	32759	156887	1060615	972959	458453	106268	32759	1640570	146623	409874	1256570	33963	1486280	231591	102006	149201	5206336	2796717	434086	662237	179835	187964	310376	256298	34704	32759	360746
3948	3-methyl catechol sulfate (1)	Xenobiotics	Benzoate Metabolism	46165	LC/MS Neg	100004112	2790	203.002						808780	582580	664114	1714065	246827	2210653	1150744	1937988	1390819	22215	106649	22215	2269290	1110800	243394	22215	42621	1006993	1602345	1909989	60705	22215	682831	268290	43517	87300	22215	3016962	4598336	653956	1408059	22215	78565	51081	26266	767845
3949	3-methyl catechol sulfate (2)	Xenobiotics	Benzoate Metabolism	46164	LC/MS Neg	100004110	2860	203.002						39611	20300	27294	95013	20300	157852	82112	126043	64859	20300	20300	20300	156023	62348	20300	20300	20300	27317	136269	102975	20300	20300	20300	20300	20300	20300	20300	212508	340638	44420	84606	20300	20300	20300	20300	27014
4003	3-phenylpropionate (hydrocinnamate)	Xenobiotics	Benzoate Metabolism	15749	LC/MS Neg	100000010	2860	149.061	501-52-0	107	10181339	C05629	HMDB00764	1447599	216657	101194	747568	1031259	3860749	814774	1368596	1628835	365995	581189	924302	67356	258355	2001412	566639	1751494	612474	1188512	3574311	523910	1114649	472176	185580	2105427	67356	118160	1092747	3520264	1399747	4170405	132006	2213316	97015	67356	444859
3950	4-ethylcatechol sulfate	Xenobiotics	Benzoate Metabolism	63072	LC/MS Neg	100020536	3379	217.018						1429069	1265344	1266462	1327882	686924	2282665	1310246	985675	734413	44599	68228	102873	1445162	2005224	312685	27526	76565	807016	1110274	3913660	102685	27526	305519	149553	157139	27526	42243	3550610	6899908	1309752	1206574	66245	113422	27526	27526	830371
3964	4-ethylphenylsulfate	Xenobiotics	Benzoate Metabolism	36099	LC/MS Neg	100001756	3580	201.023	123-07-9			C13637	HMDB62551	23129620	170169	649779	1396207	256139	227489	361080	1545661	2171104	231238	947373	1308650	663096	205242	2018347	306729	57892	544721	4040330	708147	2683795	60106	147707	74848	388468	156557	340269	466976	1011082	1947914	13024572	275958	608506	46788	78330	855178
3920	4-hydroxyhippurate	Xenobiotics	Benzoate Metabolism	35527	LC/MS Neg	100001423	1475	194.046	2482-25-9	151012	133104		HMDB13678	448673	5360049	402300	783779	982721	246548	604283	227472	723606	241191	309141	238591	994244	590651	654825	430099	1438190	1138143	218727	641015	399195	289649	460891	818710	299250	1229380	2239442	743272	689516	334312	278879	933290	487088	495784	449680	683638
3951	4-methylcatechol sulfate	Xenobiotics	Benzoate Metabolism	46146	LC/MS Neg	100004111	2665	203.002						6859149	1315809	1507039	2311846	1514595	1097918	1314187	3325627	2683666	3680587	3950570	2713773	1864111	1440843	4301922	1877054	1748239	707780	2110765	2691660	5060604	1244205	1480566	1625182	4384060	203726	6634544	3523185	3741555	1606664	2238595	2112432	2901898	779594	2537951	3137426
3946	4-methylguaiacol sulfate	Xenobiotics	Benzoate Metabolism	48418	LC/MS Neg	100006105	2978	217.018	756760-43-7					69216	17047	53065	71274	17047	17047	17047	48042	17047	61249	65214	30024	37808	30699	76144	26418	35651	17047	29971	17047	204699	17047	17047	17047	72385	17047	272131	44175	94053	21795	17047	31023	47684	17047	46342	82725
3966	4-vinylphenol sulfate	Xenobiotics	Benzoate Metabolism	36098	LC/MS Neg	100001755	3320	199.007	2628-17-3	6426766	4932200	C05627	HMDB62775	597136	839632	3958486	8102862	14215707	664689	4453596	1988394	721295	1123895	299387	621091	3173650	1123482	4161673	267499	1303856	2109915	787160	3890460	300729	114552	243967	2429583	314587	3632054	212271	2483251	3900487	551977	2816955	282804	7909958	511712	205988	1876883
3926	benzoate	Xenobiotics	Benzoate Metabolism	15778	LC/MS Neg	100000008	1750	121.029	65-85-0	243	238	C00180	HMDB01870	2109298	2407795	2087488	2185022	1599992	1879184	2008408	1347291	2140754	1441525	1687007	1999825	1522179	1854130	1817447	1748365	1105676	1600982	1808489	1699628	1511614	2000339	1452765	1203631	1373842	2101210	1967019	1585776	1817686	1998712	1735239	1928987	2956193	2825158	1994358	2340391
3944	catechol sulfate	Xenobiotics	Benzoate Metabolism	35320	LC/MS Neg	100001605	1906	188.986	4918-96-1	3083879	2341024		HMDB59724	13103325	11066971	9790728	11358271	6617932	12260721	12454237	9710857	13551521	823151	7055429	7554111	10452312	10269462	11003605	3854369	5927207	7171583	6604064	30096392	2247060	1180591	4742021	8180631	2834552	7572419	2132745	50715344	35525900	9369228	8767268	3389430	8708472	1471870	3704722	5203497
3947	guaiacol sulfate	Xenobiotics	Benzoate Metabolism	46111	LC/MS Neg	100004208	2344	203.002		22473	21078		HMDB60013	1003038	793329	1270525	1577787	684513	1272595	1201680	1139564	1007338	86742	979115	866936	1269670	1586831	1459914	847578	565540	1124078	604500	2902081	3048733	75753	413017	561963	243019	580393	246601	9505980	2939913	1214656	844356	442449	1061813	214706	657293	452026
3912	hippurate	Xenobiotics	Benzoate Metabolism	15753	LC/MS Neg	100000014	2106.9	178.051	495-69-2	464	451	C01586	HMDB00714	12452998	14658407	2467424	8812961	10618294	10661877	29864606	7798361	15173294	4923591	34622688	6130893	4572396	12819841	25666588	5389148	14032978	16419145	5127316	34921052	5662775	5600024	3306095	22825594	12037514	8428399	12917676	39896056	102924016	8415419	19332450	4789540	15936036	6390872	18508716	6224404
3980	methyl-4-hydroxybenzoate sulfate	Xenobiotics	Benzoate Metabolism	48429	LC/MS Neg	100006116	2873	230.997						527298	297095	790523	21639052	530999	26259	64789	1449979	762377	2674198	16430	726861	621996	613125	2578497	4147114	216245	547391	1229288	392158	1022514	125296	40102	27699	159270	449656	1810783	389780	43468	84424	2997263	16430	2832428	16430	100827	2744601
3994	o-cresol sulfate	Xenobiotics	Benzoate Metabolism	36845	LC/MS Neg	100001806	2796	187.007		11615528	9790277			80027	17864	230100	490310	17864	154807	182446	45191	83474	17864	17864	17864	319910	69262	86014	17864	17864	159382	45137	181997	55497	17864	21616	17864	17864	17864	17864	212985	607429	74668	255503	17864	17864	17864	17864	69462
3987	p-cresol sulfate	Xenobiotics	Benzoate Metabolism	36103	LC/MS Neg	100001315	2890	187.007	3233-57-7	4615423	3806480		HMDB11635	274894208	123413024	51316244	167095744	84775992	71805072	73770408	238964048	171542128	112377600	98140632	71711824	35539840	84483488	169853824	78489976	142137456	93664648	99978696	95680720	245188784	16247226	43185940	11153760	143266896	1727294	174932464	224034784	130291824	99723424	132880816	96301056	195368512	43681584	10438839	186690464
3982	propyl 4-hydroxybenzoate sulfate	Xenobiotics	Benzoate Metabolism	48460	LC/MS Neg	100006264	3971	259.028	162338-10-5		48063224			143473	56198	48843	2301216	52865	70694	40117	104958	40117	990188	40117	159600	57029	437289	119201	519925	40117	40117	40117	40117	81487	40117	40117	40117	40117	171122	287837	60723	40117	40117	285786	40117	548019	40117	40117	131295
5139	1,2,3-benzenetriol sulfate (2)	Xenobiotics	Chemical	48762	LC/MS Neg	100006374	1709	204.981						77972	57571	97385	258393	29947	1142867	260230	232634	91964	28796	28796	444150	96949	84851	28796	28796	332394	71562	135631	224800	28796	1524661	28796	28796	28864	734302	832421	206239	478584	28796	73539	65327	28796	28796	28796	188146
5164	2,2'-Methylenebis(6-tert-butyl-p-cresol)	Xenobiotics	Chemical	62885	LC/MS Polar	100020373	703	339.233	119-47-1	8398	8092			274572064	193458192	259614368	234332976	72601920	413072192	119351608	212815936	117514016	132527064	125957424	512007648	164138768	117162096	114387352	269732192	142726336	165983056	120992488	277706880	177073504	227959440	103429064	82786816	84373888	67959296	223324736	154759104	216362224	98734064	261965520	124409768	271556544	168431376	53603836	206020640
5039	2-aminophenol sulfate	Xenobiotics	Chemical	43266	LC/MS Neg	100004322	1677	188.002		181670	158022		HMDB61116	45471	290606	170765	403630	793309	35289	288161	180374	218432	115464	706783	19766	130472	511968	51802	39512	19766	153823	81977	120946	200729	40099	20607	107306	526656	622464	25792	525004	80336	177061	467784	303827	2809165	156526	46305	305891
5141	2-methoxyresorcinol sulfate	Xenobiotics	Chemical	48445	LC/MS Neg	100006184	1863	218.997	1446269-78-8					18400	18400	18400	35063	20471	170870	99290	38752	45764	18400	18400	278865	63211	97742	18400	18400	530270	18400	86482	52582	18400	751581	26553	18400	18400	270522	520360	51675	253955	98354	18400	56939	18400	18400	18400	45017
5037	3-acetylphenol sulfate	Xenobiotics	Chemical	48693	LC/MS Neg	100004326	2477	215.002			16230535			59797	31463	27865	80648	23567	160128	155553	37685	89453	23567	23567	23567	123057	51281	23567	23567	23567	39249	105180	151313	23567	23567	23567	23567	23567	23567	23567	183097	268868	80721	66367	23567	23567	23567	23567	30690
5142	3-hydroxypyridine sulfate	Xenobiotics	Chemical	48448	LC/MS Neg	100006098	1595.5	173.987	1955-23-3		16232314			3662316	6721132	3979838	8607670	6599061	14981193	8496397	7664951	9087068	19001	16209	16209	17868232	7328371	536052	51642	1054738	3865206	9619573	11582811	16209	16209	2060908	552177	115643	442671	94277	12978001	24882748	3943135	7520766	16209	299624	142050	16209	4964570
5135	4-hydroxychlorothalonil	Xenobiotics	Chemical	48441	LC/MS Neg	100006082	4427	244.908	28343-61-5	34217	31530			1706973	1076560	814245	973656	801981	1426551	986424	2103075	899973	991583	726001	1816573	1184656	1623450	1586169	2099211	1024775	710133	1314456	1722722	1205023	599253	608594	653401	750284	908522	839455	1203934	1471781	1964463	1362833	936736	362282	730492	589064	2542983
5132	4-methylbenzenesulfonate	Xenobiotics	Chemical	43592	LC/MS Neg	100002390	2350	171.012	104-15-4	6101	5876	C06677		37721	45263	71463	40860	75382	63906	47657	59706	59124	80504	47610	86305	78406	85734	77742	61879	86693568	79070	63166	136396	35431	69857	22470	67607	54970	67722	98106	54247	62017	65345	42350	68924	46926	45082	24347	61933
5152	6-hydroxyindole sulfate	Xenobiotics	Chemical	48698	LC/MS Neg	100006260	2498	212.002						749107	1206758	307143	712511	495666	214330	570307	646381	659299	416389	592341	367908	108361	832896	762086	751345	516273	511202	262195	569810	620997	217890	233530	98851	670361	102658	669315	800152	525903	521196	666002	331850	446972	752835	296281	951779
5113	benzoylcarnitine*	Xenobiotics	Chemical	43265	LC/MS Pos Early	100004555	3041	266.139	105450-08-6		28689447			111464	50235	62811	65412	33497	33497	47620	90738	40927	52396	64534	33497	81111	33497	53655	80127	33497	43204	44532	36883	60077	33497	33497	293158	33497	33497	100026	122729	213787	33497	95773	33497	47083	33497	69557	33497
5165	bromine	Xenobiotics	Chemical	63012	LC/MS Polar	100021110	1006	80.9168	7726-95-6	24408	22817		HMDB31434	77715176	77802512	79076904	83149648	86737408	105883056	115305936	73618960	92109456	66054584	80206280	70061856	69496536	72909672	84588968	80694192	72098576	136714112	86438648	104846416	136501744	70062552	75556464	83497280	78180176	82155408	100939896	108355264	84653824	62572704	74832536	96761672	73710296	77095848	41784952	83560288
5083	dimethyl sulfone	Xenobiotics	Chemical	43424	LC/MS Pos Early	100004284	832	95.0161	67-71-0	6213	5978	C11142	HMDB04983	498830	557409	686782	743322	673672	804171	158230	1915476	334298	185797	175173	225589	477291	448090	386028	8075194	458705	2303792	1374314	2202622	12997088	117204	1762479	146972	159278	169281	179932	297684	178634	253241	168103	333368	272861	205049	129396	242573
5085	ectoine	Xenobiotics	Chemical	35651	LC/MS Pos Early	100001635	1980	143.082	96702-03-3	126041	112069	C06231		293856	338483	448293	308267	734114	1057896	1545157	10787372	742803	2022139	1134793	1089516	1994580	182086	4926163	694688	994379	571946	681614	941377	3281375	1107813	225541	593982	401680	401653	3055070	438992	2544853	555063	1820440	941733	805639	3386299	266626	257668
5086	EDTA	Xenobiotics	Chemical	22163	LC/MS Neg	100001002	643	291.083	60-00-4	6049	5826	C00284	HMDB15109	1262948224	1400732672	2080736768	1325624832	1430203904	2578299904	1383574656	2034164480	1542272640	1509639296	1203760768	2138995072	1506842752	1461994368	1286224768	1267645440	1102991872	1393161344	1155348608	1329442048	942980544	2238660864	913376192	1245009664	1283734400	1217464960	1458374400	1515729152	1454968576	1547703936	1490301824	1452993792	1742300032	1498907136	1000405824	1425203072
5025	ethyl glucuronide	Xenobiotics	Chemical	39603	LC/MS Pos Early	100002849	1181	240.108	17685-04-0	152226	134174		HMDB10325	1288729	26743	26743	26743	26743	26743	26743	26743	504148	59045	26743	26743	406645	26743	46334	26743	26743	5254652	26743	26743	26743	26743	26743	26743	26743	26743	26743	26743	26743	313942	169582	26743	26743	26743	1335906	26743
5094	iminodiacetate (IDA)	Xenobiotics	Chemical	21025	LC/MS Pos Early	100000900	830	134.045	142-73-4	8897	8557	C19911	HMDB11753	24656544	25895840	29707184	23221312	26874254	44660856	24158830	32824804	33416118	39264352	20837432	50467260	42320208	21133824	26384488	26142534	29557580	21866076	28458544	29900820	21775836	32491026	18628306	25986482	26646428	27663180	26760130	26857986	31887900	34353752	28517200	31533184	29770116	24547792	19365780	35716952
5114	indoleacetylcarnitine*	Xenobiotics	Chemical	62279	LC/MS Pos Early	100020479	3114	319.165						519278	302298	241731	155166	377737	782934	104847	488236	207496	253809	259439	256865	630373	251081	398959	413096	223856	615020	459233	37062	443632	178994	66474	236853	180476	60050	219542	301913	65871	72556	310558	259391	286078	140949	186129	464025
5020	O-sulfo-L-tyrosine	Xenobiotics	Chemical	45413	LC/MS Neg	100005384	990	260.023		514186	448617			922659	648207	777718	700327	524366	935562	650246	796723	753447	650687	675192	995753	720404	832122	888128	772559	554954	685362	737621	684081	731441	396479	587533	596931	554449	902618	1068176	570873	577147	883941	845474	576444	608201	665730	640619	750290
5115	perfluorooctanesulfonate (PFOS)	Xenobiotics	Chemical	57564	LC/MS Neg	100010955	5233	498.93	1763-23-1	74483	67068	C18142	HMDB59586	399359	210287	187589	420884	355011	325923	265163	169888	217567	180069	33906	115656	196638	459597	223791	326983	395440	311769	322448	169456	33906	224872	44340	113681	141109	95998	256693	223646	391561	425705	194298	145590	134091	379849	113608	270989
5158	perfluorooctanoate (PFOA)	Xenobiotics	Chemical	62071	LC/MS Neg	100020208	5130	412.966		9554	9180		HMDB59587	211683	273193	166183	179125	445606	281255	203608	130778	159548	68335	37601	121929	147749	451276	107938	150432	129954	256574	95871	93407	72742	140633	51736	37075	46461	175886	115959	167502	1260655	209514	102726	53694	166189	122473	126586	155229
5124	succinimide	Xenobiotics	Chemical	41888	LC/MS Polar	100003696	2155	116.035	123-56-8	11439	10955	C07273		707025	680500	639997	873698	1035754	957676	709497	2479109	623712	1018324	595833	1120437	925287	1383670	765128	917415	793979	1078567	789797	1600647	4551901	824656	912729	508757	669822	783336	1209908	909347	1304635	1211858	1815141	708634	1163840	681198	508757	801433
5017	sulfate*	Xenobiotics	Chemical	46960	LC/MS Neg	100002528	616	96.9601	14808-79-8	1118	1086	C00059	HMDB01448	110294864	76605128	88713312	96110728	83225176	71872736	92625648	111465264	107720688	137301088	85060008	89674392	111802784	96615600	104552856	98509080	86041240	96057056	82842616	79602608	113576960	85930904	72418864	94410744	97502368	87484176	135402688	101273024	92923832	80216896	89272696	111871560	103941168	110072808	74146160	97904640
5156	thioproline	Xenobiotics	Chemical	53231	LC/MS Pos Early	100009232	1250	134.027	34592-47-4	93176	84120			5045114	4888975	5826404	5379574	7204492	7270027	5340303	7820599	5447235	4927463	4290180	7533055	4934557	5860270	4811412	5639572	4679926	6968914	5829686	5485635	5483187	5850621	4592721	5429098	6799045	4999433	6009710	6926940	4792262	6431629	7439492	6314350	5887803	6792243	5017710	4209218
4581	2-hydroxyacetaminophen sulfate*	Xenobiotics	Drug - Analgesics, Anesthetics	33173	LC/MS Neg	100001791	1674	246.008		86290013	34448632			106721	0	0	0	4335149	92912	0	0	16581313	0	0	0	0	0	0	0	2524140	2845442	0	0	21912	1103776	0	0	0	0	0	0	0	0	0	178791	0	0	0	0
4596	2-hydroxyibuprofen	Xenobiotics	Drug - Analgesics, Anesthetics	43330	LC/MS Neg	100004169	3462	221.118	51146-55-5	10443535			HMDB60920	0	0	0	0	0	0	0	850959	74909	0	0	0	0	0	653323	0	160072	0	0	0	0	0	0	0	0	0	0	101077	0	78141	0	0	0	0	0	7591157
4583	2-methoxyacetaminophen glucuronide*	Xenobiotics	Drug - Analgesics, Anesthetics	33161	LC/MS Neg	100001795	1633	356.099		14367271	52083351			26004	0	0	0	1085332	0	0	0	2549758	0	0	0	0	0	0	0	930510	1314356	0	0	0	556746	0	0	0	0	0	0	0	0	0	83192	0	0	0	0
4582	2-methoxyacetaminophen sulfate*	Xenobiotics	Drug - Analgesics, Anesthetics	47031	LC/MS Neg	100001793	1949	260.023		86290014	34448633			47222	0	0	0	1581376	30144	0	0	8032004	0	0	0	0	0	0	0	1145914	5122884	0	0	0	1116002	0	0	0	0	0	0	0	0	0	117124	0	0	0	0
4584	3-(cystein-S-yl)acetaminophen*	Xenobiotics	Drug - Analgesics, Anesthetics	34365	LC/MS Pos Early	100001797	2420	271.075		5233914	4403253			0	0	0	0	1839866	0	0	0	1795459	0	0	0	0	0	0	0	304617	1028483	0	0	0	470472	0	0	0	0	0	0	0	0	0	0	0	0	0	0
4588	3-(methylthio)acetaminophen sulfate*	Xenobiotics	Drug - Analgesics, Anesthetics	62567	LC/MS Neg	100020827	2265	276.001						55472	123924	0	0	6016459	0	0	0	396959	0	0	288482	0	0	0	0	2698657	1216669	0	0	25602	11425521	0	0	0	0	0	74967	0	0	0	284367	0	0	0	0
4578	3-(N-acetyl-L-cystein-S-yl) acetaminophen	Xenobiotics	Drug - Analgesics, Anesthetics	45721	LC/MS Neg	2048	2094	311.071	52372-86-8	83967	75765			0	0	0	0	1547817	0	0	0	817570	0	0	0	0	0	0	0	209697	474271	0	0	0	348473	0	0	0	0	0	0	0	0	0	30050	0	0	0	0
4577	4-acetamidophenol	Xenobiotics	Drug - Analgesics, Anesthetics	12032	LC/MS Neg	1383	2173.7	150.056	103-90-2	1983	1906	C06804	HMDB01859	120054	0	0	0	6474271	0	0	0	55437984	0	0	0	0	0	0	0	4287783	16690111	0	0	75487	7914451	0	0	0	0	45588	0	0	0	0	442383	0	0	0	0
4580	4-acetamidophenylglucuronide	Xenobiotics	Drug - Analgesics, Anesthetics	15736	LC/MS Neg	100000043	1400	326.088	120595-80-4	83944	3239926		HMDB10316	355752	0	0	0	26882390	48054	0	0	30768878	0	0	0	0	0	0	0	8041073	11527554	0	0	245162	5943380	0	0	0	0	163894	0	0	0	0	682990	0	0	0	0
4579	4-acetaminophen sulfate	Xenobiotics	Drug - Analgesics, Anesthetics	37475	LC/MS Neg	2049	1792	230.013	10066-90-7;32113-41-0	83939	75741	C06804	HMDB59911	705726	0	0	0	26845666	135429	0	66302	75449736	0	0	0	0	0	0	0	8198751	38286904	0	0	206866	9233464	0	0	0	0	171457	95698	0	0	0	756355	0	0	0	0
4598	carboxyibuprofen	Xenobiotics	Drug - Analgesics, Anesthetics	43333	LC/MS Neg	100004171	1920	235.098	15935-54-3	10444113	8619532		HMDB60564	0	0	0	0	0	0	0	250232	0	0	0	0	0	0	247287	0	72309	0	0	0	0	0	0	0	0	0	0	40046	0	0	0	0	0	0	0	2197988
4599	carboxyibuprofen glucuronide*	Xenobiotics	Drug - Analgesics, Anesthetics	62067	LC/MS Polar	100020212	2294	411.13					HMDB60564	0	0	0	0	0	0	0	0	0	0	0	0	0	0	0	0	0	0	0	0	0	0	0	0	0	0	0	0	0	0	0	0	0	0	0	2022702
4593	desmethylnaproxen	Xenobiotics	Drug - Analgesics, Anesthetics	46331	LC/MS Neg	100001787	3045	215.071	52079-10-4	13393711	18640362		HMDB13989	0	0	0	0	0	0	0	0	0	0	0	0	0	0	0	0	0	0	0	0	0	61042	0	0	0	0	0	0	0	0	0	0	0	0	0	0
4594	desmethylnaproxen sulfate	Xenobiotics	Drug - Analgesics, Anesthetics	46106	LC/MS Neg	100001788	2250	295.028		184679	160559			628748	0	0	0	1279811	0	0	0	0	0	0	0	43659	705985	0	0	0	0	0	0	0	1741557	0	0	0	0	0	2570419	0	0	0	1358155	0	0	0	0
4595	ibuprofen	Xenobiotics	Drug - Analgesics, Anesthetics	17799	LC/MS Neg	1487	4925	205.123	15687-27-1	3672	3544	D00126	HMDB01925	0	37795	78306	88175	0	291952	46801	3179266	267406	34530	214855	330574	117426	193348	2665274	0	2927721	418418	27355	162765	313652	570956	59407	0	0	0	0	717116	171923	1163394	278255	0	0	0	0	5326355
4600	ibuprofen acyl glucuronide	Xenobiotics	Drug - Analgesics, Anesthetics	38366	LC/MS Neg	100002406	4976	381.155	115075-59-7	163959	143793			0	0	0	0	0	0	0	153580	0	0	0	0	0	0	80925	0	0	0	0	0	0	0	0	0	0	0	0	0	0	0	0	0	0	0	0	551573
4618	lidocaine	Xenobiotics	Drug - Analgesics, Anesthetics	35661	LC/MS Pos Early	100001538	3250	235.18	137-58-6	3676	3548	D00358	HMDB14426	0	0	0	0	0	0	0	0	0	0	0	0	0	0	0	0	0	0	0	0	0	0	0	0	0	0	2348077	0	0	0	0	0	0	0	0	0
4619	N-ethylglycinexylidide	Xenobiotics	Drug - Analgesics, Anesthetics	33080	LC/MS Pos Early	100001539	3209	207.149	7728-40-7	24415	22824	C16561	HMDB60656	0	0	0	0	0	0	0	0	0	0	0	0	0	0	0	0	0	0	0	0	0	0	0	0	0	0	627322	0	0	0	0	0	196233	0	0	0
4592	naproxen	Xenobiotics	Drug - Analgesics, Anesthetics	12122	LC/MS Neg	1384	4155	229.087	22204-53-1	156391	137720	C01517	HMDB01923	2627467	0	0	0	9584613	0	0	0	0	0	0	0	775987	4879373	0	0	0	0	0	81308	0	20847880	0	0	0	0	0	13440167	0	0	0	7777150	0	0	0	0
4604	salicyluric glucuronide*	Xenobiotics	Drug - Analgesics, Anesthetics	33384	LC/MS Neg	100001332	1463	370.078			21403117			482314	71297	0	0	0	0	0	0	2735156	0	0	0	0	0	48654	0	0	8114449	0	0	0	0	0	0	0	0	7224573	0	165823	0	0	0	0	0	0	1065382
4686	3-hydroxyquinine	Xenobiotics	Drug - Antibiotic	43496	LC/MS Pos Early	100002410	3271	341.186	78549-61-8	441264	138373	C07344	HMDB01091	0	0	0	0	0	51825	0	0	0	0	0	0	0	0	0	0	0	0	0	0	0	0	0	0	0	0	0	0	0	0	0	0	0	0	0	0
4687	quinine	Xenobiotics	Drug - Antibiotic	39767	LC/MS Pos Early	100002968	3378	325.191	130-95-0	2728270	2010267			0	0	0	0	0	59069	0	0	0	0	0	0	0	0	0	0	0	0	0	0	0	0	0	0	0	0	0	0	0	0	0	0	0	0	0	0
4780	10-hydroxywarfarin	Xenobiotics	Drug - Cardiovascular	62970	LC/MS Neg	100020811	3910	323.092			19983904			0	0	0	0	0	0	0	0	0	0	0	0	0	0	0	0	0	0	0	0	0	0	0	0	0	0	0	0	0	0	0	0	0	0	0	0
4774	4-hydroxycoumarin	Xenobiotics	Drug - Cardiovascular	37445	LC/MS Neg	100002049	2470	161.024	1076-38-6	54682930	10254753	C20414		328683	0	0	34454	0	0	0	107477	54006	109573	104580	19943	69381	0	21762	29213	57714	0	23207	45165	76373	202975	0	0	67027	32287	106519	879676	0	46876	55354	58293	31093	0	0	48525
4779	7-hydroxywarfarin	Xenobiotics	Drug - Cardiovascular	62972	LC/MS Neg	100020813	3300	323.092			20129467			0	0	0	0	0	0	0	0	0	0	0	0	0	0	0	0	0	0	0	0	0	0	0	0	0	0	0	0	0	0	0	0	0	0	0	0
4764	alpha-hydroxymetoprolol	Xenobiotics	Drug - Cardiovascular	54738	LC/MS Pos Early	100006385	2900	284.186	56392-16-6	114962	102899		HMDB60994	0	0	0	0	0	0	0	55304	0	0	0	0	0	0	80122	0	0	0	0	0	0	0	0	0	0	0	11992669	0	0	700794	0	0	0	0	0	621866
4767	atenolol	Xenobiotics	Drug - Cardiovascular	38658	LC/MS Pos Early	100002726	2668	267.17	29122-68-7	2249	2162	D00235	HMDB01924	0	0	0	0	0	0	0	0	0	0	23506170	0	0	0	0	0	0	0	0	0	0	0	0	0	0	0	0	0	0	0	0	0	0	0	18940718	0
4787	candesartan	Xenobiotics	Drug - Cardiovascular	54749	LC/MS Neg	100006187	3436	439.152	139481-59-7	2541	2445	D00522,C07468	HMDB14934	0	0	0	0	0	0	0	0	0	0	0	0	0	0	0	0	0	0	0	0	0	0	0	0	0	0	1205414	0	0	0	0	0	0	0	0	0
4762	metoprolol	Xenobiotics	Drug - Cardiovascular	18037	LC/MS Pos Early	2028	3312	268.191	56392-17-7	4171	4027	D02358	HMDB01932	0	0	0	0	0	0	0	0	0	0	0	0	0	0	0	0	0	0	0	0	0	0	0	0	0	0	9018810	0	0	0	0	0	0	0	0	0
4763	metoprolol acid metabolite*	Xenobiotics	Drug - Cardiovascular	34109	LC/MS Pos Early	100001385	2950	268.154	56392-14-4	62936	56653			0	0	0	0	0	0	0	0	0	0	0	0	0	0	0	0	0	0	0	0	0	0	0	0	0	0	143698640	0	0	0	0	0	0	0	0	0
4789	olmesartan	Xenobiotics	Drug - Cardiovascular	53256	LC/MS Pos Early	100006239	3138	447.214	144689-24-7	158781	139674	D05246	HMDB14420	19287692	0	0	0	0	0	0	0	0	0	0	0	0	0	0	0	0	0	0	0	0	0	0	0	0	0	0	0	0	0	0	0	0	0	0	0
4776	ticlopidine	Xenobiotics	Drug - Cardiovascular	37032	LC/MS Pos Late	100001932	770	264.061	53885-35-1	5472	5273	C07140	HMDB14353	0	0	0	0	0	0	0	0	0	0	0	0	0	0	0	0	0	0	0	0	0	0	0	0	0	0	0	209204	0	0	0	0	0	0	0	0
4788	valsartan	Xenobiotics	Drug - Cardiovascular	48566	LC/MS Neg	100006232	4228	434.22	137862-53-4	5650	5448			0	0	0	0	0	0	0	0	0	0	0	0	0	0	0	0	0	0	0	0	0	0	0	0	0	0	0	0	0	0	0	0	0	7323508	0	0
4778	warfarin	Xenobiotics	Drug - Cardiovascular	43335	LC/MS Neg	100004175	3790	307.098	5543-57-7			C01541	HMDB01935	0	0	0	0	0	0	0	0	0	0	0	0	0	0	0	0	0	0	0	0	0	0	0	0	0	0	0	0	0	0	0	0	0	0	0	0
4811	dexlansoprazole	Xenobiotics	Drug - Gastrointestinal	57668	LC/MS Pos Late	100015794	827	370.083	138530-94-6	9578005	7852369	D08903		0	0	0	0	0	0	0	0	0	0	0	0	0	0	0	0	0	0	0	0	0	0	0	0	0	0	7902104	0	0	0	0	0	0	0	0	0
4806	famotidine	Xenobiotics	Drug - Gastrointestinal	42613	LC/MS Pos Early	100003964	2718	338.052	76824-35-6	5702160	3208	D00318	HMDB01919	0	0	0	0	0	0	0	0	0	0	0	0	0	0	0	0	0	0	0	0	0	0	0	0	0	0	0	0	0	0	0	0	0	0	6106294	0
4804	ranitidine	Xenobiotics	Drug - Gastrointestinal	38595	LC/MS Pos Early	100002735	2910	315.149	66357-59-3	3001055	2272523	D00422	HMDB01930	0	0	0	0	0	0	0	0	0	0	0	0	0	0	0	0	0	0	0	0	0	0	0	0	0	0	0	0	0	0	0	0	0	0	0	0
4805	ranitidine N-oxide*	Xenobiotics	Drug - Gastrointestinal	62485	LC/MS Pos Early	100020810	2926	331.143		3033888	2298463			0	0	0	0	0	0	0	0	0	0	0	0	0	0	0	0	0	0	0	0	0	0	0	0	0	0	0	0	0	0	0	0	0	0	0	0
4816	metformin	Xenobiotics	Drug - Metabolic	38306	LC/MS Pos Early	100002405	2817	130.109	1115-70-4	4091	3949	C07151	HMDB01921	163590	0	0	0	0	0	0	0	0	0	0	0	0	0	0	0	0	0	0	0	0	0	0	0	0	0	0	0	0	0	0	0	0	0	0	0
4821	sitagliptin	Xenobiotics	Drug - Metabolic	52954	LC/MS Neg	100008964	4485	468.111	486460-32-6	11306691	9481667			0	0	0	0	0	0	0	0	0	0	0	0	0	0	0	0	0	0	0	0	0	0	0	0	0	0	0	0	0	0	0	0	0	0	0	0
4865	chlorzoxazone	Xenobiotics	Drug - Neurological	37036	LC/MS Polar	100001935	767	167.986	95-25-0	2733	2632	C07931	HMDB14500	0	0	0	0	0	0	0	0	0	0	0	0	0	0	0	0	0	0	0	0	0	0	0	0	0	0	0	59824156	0	0	0	0	0	0	0	0
4876	homoveratric acid	Xenobiotics	Drug - Neurological	43508	LC/MS Neg	100004189	2342	195.066	93-40-3	7139	6872		HMDB00434	0	0	0	0	0	0	0	0	0	0	0	0	0	0	0	0	0	0	0	0	0	0	0	0	0	0	0	0	0	0	0	0	0	0	0	0
4861	lamotrigine	Xenobiotics	Drug - Neurological	54762	LC/MS Pos Early	100009390	3379	256.015		3878	3741	D00354	HMDB14695,HMDB05043	0	0	0	0	0	0	0	0	0	0	0	0	0	0	0	0	0	0	0	0	0	0	0	0	0	0	0	0	0	0	0	0	0	0	0	0
4869	ritalinic acid	Xenobiotics	Drug - Neurological	22196	LC/MS Pos Early	100000579	3207	220.133	19395-41-6	86863	78360		HMDB42008	0	0	0	0	0	0	0	0	0	0	0	0	0	0	0	0	0	0	0	0	0	0	0	0	0	0	0	0	0	0	0	0	0	0	0	0
4844	topiramate	Xenobiotics	Drug - Neurological	2772	LC/MS Neg	1388	4021	338.092	97240-79-4	5284627	4447672	C07502	HMDB05034	0	0	0	0	0	0	0	0	0	0	0	0	0	0	0	0	0	0	0	0	0	0	0	0	0	0	0	0	0	0	0	0	0	0	0	0
4901	4-hydroxy duloxetine glucuronide*	Xenobiotics	Drug - Psychoactive	62480	LC/MS Neg	100020796	3705	488.138			28516882		HMDB60763	0	0	0	0	0	0	0	0	0	0	0	0	0	0	0	0	0	0	0	0	0	0	0	0	0	0	0	0	0	358771	0	0	0	0	0	0
4902	5-hydroxy-6-methoxy duloxetine sulfate*	Xenobiotics	Drug - Psychoactive	62481	LC/MS Neg	100020798	3807	422.074			25061067			0	0	0	0	0	0	0	0	0	0	0	0	0	0	0	0	0	0	0	0	0	0	0	0	0	0	0	0	0	236000	0	0	0	0	0	0
4892	citalopram propionate*	Xenobiotics	Drug - Psychoactive	62479	LC/MS Neg	100020793	4400	310.088		10403174	8578612	C16610	HMDB60463	0	0	0	159308	0	0	0	0	0	0	0	0	0	0	0	0	0	223423	0	0	0	0	0	0	0	0	0	0	0	0	0	279200	0	0	0	0
4893	desmethylcitalopram*	Xenobiotics	Drug - Psychoactive	62477	LC/MS Pos Late	100020790	880	311.155		162180	142424	C16608	HMDB14021,HMDB60576	0	0	0	324860	0	0	0	0	0	0	0	0	0	0	0	0	0	709086	0	0	0	0	0	0	0	0	0	0	0	0	0	153474	0	0	0	0
4900	duloxetine	Xenobiotics	Drug - Psychoactive	40450	LC/MS Pos Late	100003445	993	298.126	116539-59-4	60835	54822			0	0	0	0	0	0	0	0	0	0	0	0	0	0	0	0	0	0	0	0	0	0	0	0	0	0	0	0	0	302115	0	0	0	0	0	0
4899	escitalopram	Xenobiotics	Drug - Psychoactive	40459	LC/MS Pos Late	100003444	908	325.171	219861-08-2	146570	129277	D07913	HMDB05028	0	0	0	598604	0	0	0	0	0	0	0	0	0	0	0	0	0	3086815	0	0	0	0	0	0	0	0	0	0	0	0	0	514517	0	0	0	0
4884	hydroxybupropion	Xenobiotics	Drug - Psychoactive	32882	LC/MS Neg	100001309	5084	254.095		446	21403106		HMDB12235	0	0	0	0	0	0	0	0	0	0	0	0	0	0	0	0	0	0	0	0	0	0	0	0	0	0	0	0	0	0	0	0	0	0	0	0
4906	mirtazapine	Xenobiotics	Drug - Psychoactive	40437	LC/MS Pos Early	100003450	3353	266.165	61337-67-5	4205	4060	C07570,D00563		0	0	0	0	0	0	0	0	0	0	0	0	0	0	0	0	0	0	0	0	0	0	0	0	0	0	0	0	0	0	0	0	0	0	0	0
4889	N,O-didesmethylvenlafaxine glucuronide	Xenobiotics	Drug - Psychoactive	52358	LC/MS Pos Early	100006001	2902	426.212	1021933-99-2				HMDB61167	0	0	0	0	0	0	0	0	0	0	0	0	0	0	0	0	0	0	0	0	0	0	0	0	0	0	0	0	0	0	0	0	0	0	0	0
4887	O-desmethylvenlafaxine	Xenobiotics	Drug - Psychoactive	43334	LC/MS Pos Early	100004173	3253	264.196	300827-87-6	125017	111300	D07793	HMDB60532	0	0	0	0	0	0	0	0	0	0	0	0	0	0	0	0	0	0	0	0	0	0	0	0	0	0	0	0	0	0	0	0	0	0	0	0
4886	venlafaxine	Xenobiotics	Drug - Psychoactive	38623	LC/MS Pos Late	100002807	848	278.211	93413-69-5	5656	5454	C07187	HMDB05016	0	0	0	0	0	0	0	0	0	0	0	0	0	0	0	0	0	0	0	0	0	0	0	0	0	0	0	0	0	0	0	0	0	0	0	0
4915	zolpidem	Xenobiotics	Drug - Psychoactive	62976	LC/MS Pos Early	100004174	3346	308.176	82626-48-0					0	0	0	0	0	0	0	0	0	0	0	0	0	0	0	0	0	715586	0	0	0	0	0	0	0	0	0	0	0	0	0	55692116	0	0	6100684	0
4928	cetirizine	Xenobiotics	Drug - Respiratory	54745	LC/MS Pos Late	100009034	1052	389.163	83881-51-0	2678	2577	C07778	HMDB05032	0	0	0	0	0	0	0	0	0	0	0	0	0	0	0	0	0	0	0	0	0	0	0	0	0	0	0	0	0	0	0	0	0	0	0	0
4927	fexofenadine	Xenobiotics	Drug - Respiratory	42021	LC/MS Pos Late	100004018	944	502.295	83799-24-0	3348	3231	C06999	HMDB05030	0	0	0	0	0	0	0	0	0	0	0	0	0	0	0	0	0	0	0	0	0	40989428	0	0	0	0	0	0	0	0	0	0	0	0	0	0
4932	guaifenesin	Xenobiotics	Drug - Respiratory	43390	LC/MS Pos Early	100004286	2656	199.096	93-14-1	3516	3396	D00337	HMDB04998	0	0	0	0	0	0	0	0	0	0	0	0	0	0	0	0	0	0	0	0	17374362	0	0	0	0	0	0	59849300	0	0	0	0	0	0	0	0
4935	pseudoephedrine	Xenobiotics	Drug - Respiratory	39586	LC/MS Pos Early	100002738	3041	166.123	90-82-4	7028	6761	C02765	HMDB01943	0	0	0	0	0	0	0	0	0	0	0	0	0	0	0	0	0	0	0	0	0	0	0	0	0	0	0	22228808	0	0	0	0	0	0	0	0
4940	2,6-dihydroxybenzoic acid	Xenobiotics	Drug - Topical Agents	63042	LC/MS Neg	100020837	2575	153.019	303-07-1	9338	8974		HMDB13676	1375124	1192894	1057871	1674313	3062738	939005	2856408	1588268	1973425	766174	1856296	516004	1200408	1146998	939445	1162476	627396	2163100	1390375	2777372	667284	537625	586452	3501853	1141607	5833691	1796378	4054561	556036	1761311	2625487	1826460	7279618	1006609	304758	1127950
4944	hydroquinone sulfate	Xenobiotics	Drug - Topical Agents	35322	LC/MS Neg	100001604	1395	188.986	123-31-9	161220	141624	C00530	HMDB02434	35940	55184	82231	80502	81478	36968	61273	20923	47660	18048	0	0	70036	57694	85591	0	110504	23199	28217	168289	0	0	0	0	0	66467	0	82100	122347	32467	32309	22675	39159	0	0	34980
4939	salicylate	Xenobiotics	Drug - Topical Agents	1515	LC/MS Polar	501	802	137.024	69-72-7	338	331	C00805	HMDB01895	367789280	21961240	2275033	3410285	9944553	5788122	2529056	5777209	5752203264	18657556	2536267	4525017	3323127	2147477	22383054	1438295	36264868	1512811136	9222092	9818437	2507150	9852904	4174490	3190045	4699755	8113471	195099472	3804651	6409409	4284979	2161140	807160	4029059	1837614	932957	427987264
4513	(2,4 or 2,5)-dimethylphenol sulfate	Xenobiotics	Food Component/Plant	62533	LC/MS Neg	100020519	3474	201.023						38459	14600	205201	346696	14600	14600	67951	21305	14600	14600	14600	32275	238847	14600	79184	15895	14600	224862	34043	94963	14600	14600	14600	14600	14600	14600	14600	47862	259374	14600	237846	14600	19152	14600	14600	43454
4124	2,3-dihydroxyisovalerate	Xenobiotics	Food Component/Plant	38276	LC/MS Polar	100002417	1050	133.051	1756-18-9	677	657	C04039	HMDB12141	1429128	2932634	14965918	671559	3198283	7922327	726052	769730	18078744	3406232	582144	1109338	993693	257918	1343259	1288881	1625374	44228892	1908158	2115168	929060	2242479	895232	1253794	3518242	624944	1173450	1813910	429939	3942304	2927582	679106	927896	4756016	2639487	1240167
4132	2-isopropylmalate	Xenobiotics	Food Component/Plant	15667	LC/MS Polar	100000409	2605	175.061	3237-44-3	77	76	C02504	HMDB00402	571170	2928562	36491116	591906	699024	534106	294234	294234	5264524	2796507	638858	294234	1534655	526344	364692	1448623	1752879	13806732	977246	1419759	388952	1184311	294234	2310213	1261286	294234	982337	5948578	815877	23103258	994757	294234	429289	615887	1975700	1427462
4442	2-keto-3-deoxy-gluconate	Xenobiotics	Food Component/Plant	48141	LC/MS Polar	100005946	1900	177.04	17510-99-5	161227	141630	C00204	HMDB01353	12868849	12681507	12707641	11229970	11989487	9155753	9757639	9904628	12057873	9660630	8225955	11721840	13832275	8737594	13757209	11139141	9101529	12599330	14231254	13367233	10701072	10943149	5995364	9204011	8382639	12657300	14037998	8754207	6072119	12743156	9080850	7821843	17841102	10043991	6649711	13759824
4040	2-piperidinone	Xenobiotics	Food Component/Plant	43400	LC/MS Pos Early	100004295	1675	100.076	675-20-7	12665	12144		HMDB11749	6621500	19700632	13677605	8577063	14547775	9361121	19826680	4162707	2246844	12807477	20846814	8131933	3329185	18184460	5586874	10167617	34419852	4549610	2571001	19440624	5300730	2416092	3750072	2849259	5744722	47595092	148290912	3773794	9336170	6368324	5639941	10661929	9122624	99147584	19544044	43583140
4464	3,4-methyleneheptanoate	Xenobiotics	Food Component/Plant	53026	LC/MS Neg	100006651	3807	141.092						272634	65219	65219	282360	65219	67312	65219	216864	283527	249378	70099	376799	409142	169314	82326	265558	600245	65219	120510	654355	275227	65219	253764	223411	532647	580238	221822	391092	65219	842132	95311	128426	65219	630635	208191	240834
4240	3-ethylcatechol sulfate (1)	Xenobiotics	Food Component/Plant	62796	LC/MS Neg	100020851	3422	217.018						42761	30616	91778	169530	23806	127851	90889	131830	78177	23806	23806	23806	171439	74169	23806	23806	23806	85501	79699	199168	23806	23806	23806	23806	23806	23806	23806	249512	332234	57411	149464	23806	23806	23806	23806	45274
4136	3-formylindole	Xenobiotics	Food Component/Plant	62863	LC/MS Neg	100020219	3709	144.045		10256	9838	C08493	HMDB29737	723415	833565	939057	547676	557114	1478813	380130	1070720	900207	736379	745447	803181	1538000	913717	917305	822107	411725	665972	741417	854322	1129763	576635	393982	916762	707899	670388	1099118	1719976	651687	918478	1027383	854213	654863	866427	808457	653108
4380	3-hydroxystachydrine*	Xenobiotics	Food Component/Plant	62062	LC/MS Pos Early	100020203	1049	160.097		442640	391002			14738993	1350778	375385	375385	375385	375385	375385	375385	375385	593428	375385	375385	375385	796015	375385	12558252	31266114	1140481	604950	2596573	375385	2345328	375385	375385	1997737	1293794	1858732	375385	1313396	1409455	3084733	3315026	375385	546705	375385	375385
4403	4-allylphenol sulfate	Xenobiotics	Food Component/Plant	37181	LC/MS Neg	100001868	3805	213.023						110087	394888	362413	242410	540615	756425	220169	656887	20168	265945	71098	2170115	1343874	249151	600827	4336856	93265	255838	313375	2597161	157470	138021	114356	974991	126351	5844769	1334511	188093	178660	1798801	386631	144299	632709	1759178	389711	265439
4432	4-vinylguaiacol sulfate	Xenobiotics	Food Component/Plant	48442	LC/MS Neg	100006126	3354	229.018						36104	75155	221489	328014	427655	640515	188715	212932	76996	17101	17101	17101	449231	558221	106231	17101	39814	369219	426965	317466	17101	17101	71836	69187	65176	188317	17101	255143	2845603	143190	204921	17101	17101	17101	17101	172051
4361	acesulfame	Xenobiotics	Food Component/Plant	48569	LC/MS Neg	100006203	1581	161.987	55589-62-3	36573	33607		HMDB33585	5659864	523509	926847	4421842	498272	505756	61438	61438	61438	108772	1354804	61438	61438	61438	557751	61438	61438	1757778	61438	61438	81476	61438	61438	61438	61438	61438	61438	393547	106209264	61438	61438	61438	61438	61438	2304871	276069
4168	alliin	Xenobiotics	Food Component/Plant	41494	LC/MS Pos Early	100003473	1470	178.053	556-27-4	87310	78760	C08265	HMDB33592	106322	4540921	4336578	43407	69802	1354704	101080	287100	157240	260012	417551	1462862	966417	58666	435218	43407	457335	157951	97791	542259	2497856	43407	67123	43407	772217	1074874	193754	591028	7080816	296938	885137	43407	124833	533349	43407	43407
4152	betonicine	Xenobiotics	Food Component/Plant	38100	LC/MS Pos Early	100002153	1012	160.097	515-25-3	164642	144333	C08269	HMDB29412	1955136	661386	1801776	2567156	3922812	1835348	2076564	46100112	3650357	491596	746654	2254324	13721189	131210	12019073	131210	7986578	401724	210852	971691	15503354	206345	1698762	13599400	1284166	1323703	317544	1399695	185342	1019731	1110109	1123712	5564253	370439	195518	62215820
4514	caffeic acid sulfate	Xenobiotics	Food Component/Plant	53254	LC/MS Polar	100009337	1307	258.992			30777608		HMDB41708	2097713	3201196	1545295	7970623	5532504	11647097	3869728	14675203	10011832	84504	128325	84504	11387769	10371681	84504	84504	4112565	1655949	9867012	14552080	146795	1563114	3512614	2037081	1270801	531218	475746	10913762	16383174	84504	8284628	84504	251958	927988	313267	3544135
4202	cinnamoylglycine	Xenobiotics	Food Component/Plant	38637	LC/MS Neg	100002253	3127	204.067	16534-24-0	709625	618829		HMDB11621	505879	36384	36384	261008	156044	325918	338630	534381	142131	135844	171662	566248	36384	39837	467610	173071	319360	861592	156817	832202	78513	37517	54076	36384	119664	36417	36384	353044	554373	152514	757310	36384	430592	36384	43111	101017
4184	dihydrocaffeate sulfate (2)	Xenobiotics	Food Component/Plant	62524	LC/MS Polar	100020822	1328	261.007						2577744	17622068	48164904	8626635	4417563	8296165	7193561	9487207	4657198	976239	393134	848188	9411074	6880710	1955277	1223573	3635849	12048988	5867285	34854936	11879097	466376	1928065	18090578	594035	6274020	970516	29481496	55878848	1576141	5499540	2939562	3086939	10726414	647149	5279862
4226	dihydroferulate	Xenobiotics	Food Component/Plant	40481	LC/MS Neg	100003432	1928	195.066	1135-23-5	14340	13701			32948	257337	965357	61986	93487	168769	197364	125453	74457	32948	32948	32948	150705	234362	32948	32948	288854	1698282	56648	452746	37492	50305	32948	447885	57938	398177	40905	713524	1868220	55591	57054	40110	118241	109078	32948	82219
4236	ergothioneine	Xenobiotics	Food Component/Plant	37459	LC/MS Pos Early	100002154	850	230.096	58511-63-0	3032311	2297320	C05570	HMDB03045	2693589	710829	1757602	1205968	1886825	4582374	1143933	3927729	1323409	980187	1695080	1918143	2132100	1508395	1253719	3566896	2846575	1177763	3355301	2277128	2568434	1926757	428668	506108	1054833	386257	1679676	2775190	1320856	1161616	1849358	2946658	4011770	1166405	1076037	2776314
4238	erythritol	Xenobiotics	Food Component/Plant	20699	LC/MS Polar	100000846	1491	167.056	149-32-6	222285	13835932	C00503	HMDB02994	2818704	2623371	2842564	2324082	2773357	2246623	3074911	2511484	477877856	2131695	2359664	2222462	2702230	2113796	2574213	2792400	3138251	4237843	2754874	3254503	4431412	2003073	1997387	2838494	2482195	2491251	4542550	3610023	2647806	2031450	3613004	2894650	6890608	2879695	12328165	2046743
4404	ethyl alpha-glucopyranoside	Xenobiotics	Food Component/Plant	63152	LC/MS Neg	100015965	1576	207.087	34625-23-5	428040	378664			1018511	908782	118900	22069	22069	22069	22069	22069	793598	22069	45622	174421	1253852	22069	525023	22069	22069	8883964	64041	381196	22069	22069	22069	56982	22069	22069	22069	22069	22069	764000	1152142	22069	22069	22069	1649721	22069
4438	eugenol sulfate	Xenobiotics	Food Component/Plant	48715	LC/MS Neg	100006171	3782	243.033	95480-60-7	180632	157181			110173	156605	603914	22508	544208	129423	120652	139463	24894	33215	22508	22508	57028	22508	49597	101761	1127378	89928	22508	22508	62805	933908	22508	49972	36966	1028045	22508	22508	156138	250213	76931	22508	22508	127227	26385	153855
4243	ferulic acid 4-sulfate	Xenobiotics	Food Component/Plant	47114	LC/MS Neg	100005389	1200	273.007	86321-29-1	6305574	4878542		HMDB29200	22170	41093	66788	55168	124554	101860	54783	92679	118239	22170	22170	22170	173978	117411	22170	63131	69678	40413	39371	122574	22170	22170	22170	22170	22170	28009	22170	211775	414508	22170	144727	22170	22170	22170	22170	75213
4157	gluconate	Xenobiotics	Food Component/Plant	587	LC/MS Polar	338	2922	195.051	527-07-1	10690	10240	C00257	HMDB00625	33708744	32808590	27159384	34369640	34206992	17140260	27081956	41038968	42150284	37050848	26980998	20690696	41295232	31014674	33560008	48316120	35604112	23842504	50714312	48871852	31900000	17446340	21413976	33335632	37070204	40787760	35448824	54316228	25907556	33786476	30182384	29757200	33066388	28204976	17932612	41471340
4328	glucuronide of piperine metabolite C17H21NO3 (3)*	Xenobiotics	Food Component/Plant	62290	LC/MS Neg	100020491	3951	462.177						44675	108640	158765	41506	86700	299970	70951	124292	15998	449844	58629	276693	60626	105892	42178	134562	80682	54952	15998	28443	347221	15998	53634	42405	53554	52358	90993	15998	15998	61281	15998	99327	112076	156596	203677	27561
4329	glucuronide of piperine metabolite C17H21NO3 (4)*	Xenobiotics	Food Component/Plant	62291	LC/MS Neg	100020492	3992	462.177						143074	260492	407713	116832	177294	782810	209286	310943	33536	1148290	144096	718493	135360	285155	127061	406047	198248	165625	33536	82036	703124	61977	111786	100546	119991	145075	230163	62701	33536	169218	75112	221533	257774	380671	434821	87747
4330	glucuronide of piperine metabolite C17H21NO3 (5)*	Xenobiotics	Food Component/Plant	62292	LC/MS Neg	100020493	4039	462.177						61159	126569	207612	69277	114802	420733	99651	170512	22978	608527	63778	369148	71684	153783	49804	182677	95170	75102	22978	29540	484240	22978	91320	54963	60384	86835	111759	22978	22978	68177	22978	113319	146267	189502	263682	39605
4264	histidine betaine (hercynine)*	Xenobiotics	Food Component/Plant	62278	LC/MS Pos Early	100004059	2094	198.124	534-30-5	3083620	2340795			197254	38832	116623	125376	94263	241982	134213	389303	143677	78804	146298	128984	295500	153134	167648	368809	138221	120718	232246	172455	270942	218116	27709	120513	213764	69234	257560	341922	191915	45059	131300	103389	340432	83239	80338	247623
4267	homostachydrine*	Xenobiotics	Food Component/Plant	33009	LC/MS Pos Early	100001550	1750	158.118	1195-94-4	441447	390180	C08283	HMDB33433	2433092	2870557	4738565	8077312	2591728	2373097	3670533	2491395	12024657	4199483	2237830	3365668	9870465	1991606	2184266	1193598	6631504	5069521	3082860	16633120	1882474	2131975	1271354	3218778	10941541	71878848	5457437	6841834	6467836	1803768	5239537	2090544	3707199	1832784	1436816	5748861
4113	levulinate (4-oxovalerate)	Xenobiotics	Food Component/Plant	22177	LC/MS Neg	100000765	934.6	115.04	123-76-2	11579	11091		HMDB00720	684730	590118	725149	530958	376169	1203333	1350214	569454	912401	311580	259567	227984	957564	547365	455425	227984	295033	433855	470543	1588566	227984	227984	227984	227984	227984	453398	227984	4687289	1958329	809786	706164	227984	456185	394246	855624	550940
4289	mannonate*	Xenobiotics	Food Component/Plant	62864	LC/MS Polar	100003695	2736	195.051	642-99-9	3246006	2496757			17789012	14801633	10498267	15138181	16851540	10650316	10388903	17782670	18147640	13675939	15166116	11804976	18228876	16210719	18721528	19574460	14280507	17979658	23193348	17802232	18568106	14689048	8053959	12114193	10137821	21928220	22437784	20286740	13052108	15415203	16002836	14536083	15503537	14560240	9772158	15313609
4405	methyl glucopyranoside (alpha + beta)	Xenobiotics	Food Component/Plant	46144	LC/MS Neg	100005864	1070	193.072						605828	170693	154827	105033	230843	254607	87106	932428	474374	363139	176443	207456	486880	167768	303723	1227647	1216968	215780	131945	508872	897889	107342	210978	457217	356992	253591	161560	327950	251201	305169	254154	590819	454989	189452	270360	317038
4293	methyl indole-3-acetate	Xenobiotics	Food Component/Plant	1584	LC/MS Pos Early	1104	3380	190.086	1912-33-0	74706	67279		HMDB29738	96619	144191	38107	71952	117685	413196	41822	293049	293802	76149	205998	101127	80406	78308	133988	84990	156098	150079	81086	88446	120963	38107	38107	287471	56185	117484	99204	281780	61947	155249	57344	93289	138128	81202	38107	168040
4296	N-(2-furoyl)glycine	Xenobiotics	Food Component/Plant	31536	LC/MS Neg	100001086	1525	168.03	5657-19-2;5657-19-2	21863	20549		HMDB00439	585656	356682	240339	1484774	294616	4392167	2710080	1698708	1185035	37630	35223	18908	5820545	2210074	74678	18908	81864	833246	3132639	2281500	25656	167348	459487	123141	68277	114525	50013	1437567	9570251	1591153	1373502	18908	61869	19804	59400	863589
4169	N-acetylalliin	Xenobiotics	Food Component/Plant	45404	LC/MS Pos Early	100005367	1348	220.064						298102	9069511	4250268	56731	110280	1263919	226526	281298	111025	591651	505720	1720209	743671	626738	489214	56731	161495	103930	74327	268986	4896778	56731	56731	56731	326838	570111	978697	796924	4783047	1490235	618801	189507	111179	1021097	127648	513038
4298	N-oxalyl glycine (NOG)	Xenobiotics	Food Component/Plant	57776	LC/MS Polar	100015923	3292	146.009		3080614	2338366			269059	108015	601316	490294	351048	74134	67418	555767	67418	580506	107024	839928	1901901	663514	67418	824015	67418	442024	67418	153783	117487	67418	589803	222784	661041	67418	468124	220632	541678	286329	67418	600691	860790	447420	383227	266717
4319	phytanate	Xenobiotics	Food Component/Plant	598	LC/MS Neg	466	5908	311.296	14721-66-5	26840	10140204	C01607	HMDB00801	1586005	2065411	2397144	1709696	1944903	2041014	2816245	2567667	4453083	6434658	3015157	2550234	3337181	3686077	652757	2680121	1671718	2152847	1314768	1430306	873924	1493194	1890049	2653071	2027193	2545379	2910709	734766	7677758	3187109	2917761	1194423	1065759	1780435	611903	2011065
4325	piperine	Xenobiotics	Food Component/Plant	33935	LC/MS Pos Late	100001267	1168	286.144	94-62-2	638024	553590	C03882	HMDB29377	7609006	30423040	12371429	6781905	11047339	74024944	6679695	16633951	4301435	250382848	9147452	12339299	4513148	6399899	6157352	9247843	14871946	1923114	3915395	6428519	68300960	2125382	7502727	4370963	10760070	2431704	8635464	3986942	627090	11595520	4173287	6870790	19924952	20601190	4286475	4310254
4433	pyrraline	Xenobiotics	Food Component/Plant	48428	LC/MS Pos Early	100001767	2750	255.134	74509-14-1	122228	19980286		HMDB33143	185010	93966	299434	141268	812539	44080	199515	229583	190970	348056	202946	29411	322489	71634	145106	124699	453112	209637	575888	697518	340072	29411	114965	696500	252267	163832	99519	275789	230546	75681	143155	258886	196400	106350	150861	682130
4354	quinate	Xenobiotics	Food Component/Plant	18335	LC/MS Polar	100000442	2432.9	191.056	77-95-2	6508	10246715	C00296	HMDB03072	61639084	78001608	90304440	257273488	31420508	130634480	159358880	144580224	208326256	439383	15787962	1614677	193858432	116272320	25570144	7563189	39202048	116711432	105599616	264134016	375791	5498390	44272736	55669556	2642493	12526803	20520164	306713376	295444864	46213220	130812528	1079251	18171216	24914944	197523	84290648
4362	S-allylcysteine	Xenobiotics	Food Component/Plant	43239	LC/MS Pos Early	100004509	2690	162.058	21593-77-1	98280	88744		HMDB34323	151761	13877821	6845793	29862	76386	619654	113071	285331	98507	616204	826315	1592071	2445584	488499	295150	29862	493888	146486	29862	525264	2209707	32704	52043	29862	2705650	338227	280360	463304	2439945	1669526	246628	110744	29862	906046	29862	43033
4359	saccharin	Xenobiotics	Food Component/Plant	21151	LC/MS Neg	100000870	2000	181.992	81-07-2	5143	4959	D01085	HMDB29723	34970	34970	34970	34970	34970	34970	34970	4018499	85976	34970	34970	34970	34970	69490	34970	34970	61119	569763	34970	34970	5198655	34970	34970	34970	34970	1436420	38612	34970	34970	34970	34970	272025	34970	34970	34970	34970
4379	stachydrine	Xenobiotics	Food Component/Plant	34384	LC/MS Pos Early	100001296	1440	144.102	4136-37-2	115244	103115	C10172	HMDB04827	334452288	129743928	20639220	25022000	105987888	35677496	7452712	105123984	61355584	139074512	22138080	55843640	131089816	49056100	65668344	211813056	451067296	174687280	41995896	247650496	31936920	199226624	50585716	161430000	165014304	170704352	146263648	29822214	99442216	173965920	209192320	298042400	9993616	49763452	31885688	14217131
4337	sulfate of piperine metabolite C16H19NO3 (2)*	Xenobiotics	Food Component/Plant	62295	LC/MS Neg	100020496	4112	352.086						121872	550489	138144	60086	175342	372472	60086	60086	60086	2781475	83513	60086	60086	60086	60086	95703	104563	60086	79787	60086	329133	60086	88948	60086	64471	60086	82608	73712	60086	60086	60086	60086	178603	155075	60086	60086
4338	sulfate of piperine metabolite C16H19NO3 (3)*	Xenobiotics	Food Component/Plant	62296	LC/MS Neg	100020497	4200	352.086						67782	183008	87262	49205	116636	243983	57045	112443	26382	1407598	60534	36741	46408	16392	27274	96214	42986	16392	56999	74418	168225	16392	48227	27856	69715	16392	50487	56452	16392	46388	58872	16392	122143	104704	20268	16392
4516	tartronate (hydroxymalonate)	Xenobiotics	Food Component/Plant	20693	LC/MS Neg	100000840	610	118.999	80-69-3	45	44	C02287	HMDB35227	796520	894814	334663	618676	698501	114314	114314	791689	1311939	1222674	628573	610280	4259167	795949	868405	1254827	1941668	535242	1095968	856612	1232289	114314	916888	1382657	1214638	1103097	721914	1079319	859587	1445015	828392	959097	1339262	460825	479193	975850
4388	theanine	Xenobiotics	Food Component/Plant	22206	LC/MS Pos Early	100000784	2180	175.108	3081-61-6	439378	388498	C01047	HMDB34365	97867	78373	78373	185642	78373	78373	78373	78373	78373	78373	78373	78373	78373	78373	78373	127442	434298	78373	78373	78373	78373	158441	78373	13133122	613972	1566519	9697599	78373	78373	78373	78373	78373	78373	78373	78373	78373
4391	thymol sulfate	Xenobiotics	Food Component/Plant	36095	LC/MS Neg	100001757	4410	229.054	89-83-8		10709958	C09908	HMDB01878	6651455	669396	221360	199208	344385	5958874	20167	804779	220506	1359669	20167	394440	334198	178817	913562	1354959	2391004	4491909	140948	1135095	128882	613369	35855	20167	33516554	8205041	855879	196920	20167	1292849	1769101	20167	935558	989372	233917	278238
4435	umbelliferone sulfate	Xenobiotics	Food Component/Plant	48674	LC/MS Neg	100006282	2440	240.981	69526-88-1	129659	114800			177934	19971	94839	19971	19971	19971	32047	19971	19971	1154543	19971	19971	71863	26472	19971	78524	19971	19971	19971	19971	19971	19971	19971	19971	19971	19971	19971	10657438	19971	19971	19971	19971	19971	19971	19971	19971
4027	3-hydroxycotinine glucuronide	Xenobiotics	Tobacco Metabolite	43470	LC/MS Neg	100004494	1745	367.115	132929-88-5	183115	159230		HMDB01204	0	0	84744	105563	0	0	0	0	144250	0	0	0	75675	0	0	0	0	133491	0	0	0	0	0	0	0	0	0	0	251574	0	82799	0	0	0	0	0
4023	cotinine	Xenobiotics	Tobacco Metabolite	553	LC/MS Pos Early	848	2213	177.102	486-56-6	854019	746405		HMDB01046	0	64838	21345110	63982248	0	95528	3070626	66516	56700376	31081	68820	0	46469080	659204	8436053	0	71642	30426018	0	27935	33501	0	0	0	0	0	85874	0	75406824	0	59494004	0	0	0	0	3647708
4025	cotinine N-oxide	Xenobiotics	Tobacco Metabolite	38662	LC/MS Pos Early	100002719	1377	193.097	36508-80-2	9815514	7991264		HMDB01411	0	0	246756	684933	0	0	0	0	304914	0	0	0	459956	0	65489	0	0	261819	0	0	0	0	0	0	0	0	0	0	693278	0	547104	0	0	0	0	0
4024	hydroxycotinine	Xenobiotics	Tobacco Metabolite	38661	LC/MS Pos Early	100002717	2030	193.097	34834-67-8	10219774	8395266		HMDB01390	0	0	3109328	4351326	0	0	363970	0	5042464	0	0	0	5233215	77114	827428	0	0	5152606	0	0	0	0	0	0	0	0	0	0	8522885	0	9975808	0	0	0	0	0
4032	norcotinine	Xenobiotics	Tobacco Metabolite	57782	LC/MS Pos Early	100002715	2156	163.087	17114-40-8	413	400		HMDB01297	0	0	50294	213434	0	0	0	0	88119	0	0	0	85421	0	0	0	0	65625	0	0	0	0	0	0	0	0	0	0	251287	0	194421	0	0	0	0	0
4033	nornicotine	Xenobiotics	Tobacco Metabolite	38122	LC/MS Pos Early	100002224	2947	149.107	5746-86-1		21108497			0	0	0	104351	0	0	0	0	0	0	0	0	60807	0	0	0	0	0	0	0	0	0	0	0	0	0	0	0	98474	0	42614	0	0	0	0	0
4014	1,3,7-trimethylurate	Xenobiotics	Xanthine Metabolism	34404	LC/MS Neg	100001397	1985	209.068	5415-44-1	79437	71754	C16361	HMDB02123	400777	380686	229138	408287	93045	444923	291797	808472	490611	27588	27588	27588	780293	587454	76403	27588	27588	419369	482552	827827	27588	27588	151012	647090	27588	134864	236477	1566717	592100	100366	401073	27588	27588	119067	458245	243782
4011	1,3-dimethylurate	Xenobiotics	Xanthine Metabolism	32391	LC/MS Neg	100001106	1671.4	195.052	944-73-0	70346	63527		HMDB01857	141306	118315	213227	213492	24161	84550	158947	266970	107024	24161	24161	24161	166343	93142	85698	24161	24161	194054	185647	420965	24161	24161	49259	206386	24161	158131	135921	283643	131460	76827	236849	24161	24161	114468	252188	72816
4012	1,7-dimethylurate	Xenobiotics	Xanthine Metabolism	34400	LC/MS Neg	100001399	1578.6	195.052	33868-03-0	91611	82720	C16356	HMDB11103	653886	995338	1114093	1180389	279165	634227	1107916	2090357	723771	24163	284838	177457	729561	1101836	552782	88080	220062	1628446	878700	2606284	151871	220196	458276	565825	117986	884972	1153155	2303075	1328838	403604	862007	24163	24163	758896	1054212	381853
4009	1-methylurate	Xenobiotics	Xanthine Metabolism	34395	LC/MS Neg	100001400	1099	181.037	708-79-2	69726	62926	C16359	HMDB03099	1436949	1308886	1824789	1984658	429273	978799	2836284	2027689	1707137	47092	1351615	445935	1271643	1080595	924931	439310	539167	2623056	1782227	6016550	354226	403379	486508	613882	208098	3011643	2347397	2539447	2527995	749250	2812924	47092	47092	985766	1072862	629030
4015	1-methylxanthine	Xenobiotics	Xanthine Metabolism	34389	LC/MS Neg	100001405	1568.8	165.042	6136-37-4	80220	72464	C16358	HMDB10738	547315	1659008	3540714	1863692	251159	883864	1173683	2279132	902915	111240	389255	267507	1542432	2004698	592098	111240	292671	3952449	1255919	4286321	287524	202402	304204	530211	111240	2200193	928896	1740250	1833419	561914	2655586	111240	111240	395930	715680	352188
4013	3,7-dimethylurate	Xenobiotics	Xanthine Metabolism	34399	LC/MS Neg	100001398	1418.2	195.052	13087-49-5	83126	74994	C16360	HMDB01982	191523	26299	26299	39725	26299	26299	112010	45301	136449	26299	191806	50118	62790	26299	138169	26299	26299	28648	80372	127941	26299	26299	26299	59368	26299	90966	86212	232062	26299	26299	64712	33455	26299	31848	26299	34074
4016	3-methylxanthine	Xenobiotics	Xanthine Metabolism	32445	LC/MS Neg	100001108	1700	165.042	1076-22-8	70639	63805	C16357	HMDB01886	3670369	350077	1498982	1063127	304550	266057	4499354	878852	3435689	180219	2541970	947992	1289514	385387	2714784	261158	467285	1150119	2796265	5761876	205507	267778	359371	976347	366241	1769013	2368598	3419125	1388554	749777	1991582	818872	152788	649729	378349	326975
4018	5-acetylamino-6-amino-3-methyluracil	Xenobiotics	Xanthine Metabolism	34424	LC/MS Polar	100001403	1710	197.068	1196153-01-1	88299	79659	C16366	HMDB04400	3166043	6008850	8732681	21533968	1860791	4184522	20876036	13975546	9126137	145234	1919863	1101021	8643467	5309368	6641614	1170509	1704744	9129989	10349189	17062538	1248751	1264767	4341017	2208720	1839677	9357598	10175873	21220916	8879440	4472982	9473845	145234	145234	6749404	10040912	6759326
4019	5-acetylamino-6-formylamino-3-methyluracil	Xenobiotics	Xanthine Metabolism	34401	LC/MS Polar	100001402	1424	225.063	85438-96-6	108214	97287	C16365	HMDB11105	748195	1467237	1327174	9279771	762558	1737648	11169706	4123744	6378837	188095	397971	482963	4588614	1430510	3209328	575199	578132	3028544	1805630	1853338	269649	387771	2042560	676240	942190	2260644	1553478	9846747	2266373	1647625	2191541	312227	188095	3635887	8854847	4298579
4010	7-methylurate	Xenobiotics	Xanthine Metabolism	39598	LC/MS Neg	100002241	1138	181.037	612-37-3	69160	62375	C16355	HMDB11107	878366	439152	816979	1122045	201029	299062	1330586	1319990	1080051	53765	1026617	313232	662913	594405	1175654	209689	268023	1302550	1531582	2127404	189133	99396	123673	516728	159441	1083363	933429	1313052	1451016	238736	1495031	591789	53765	516455	782644	503684
4017	7-methylxanthine	Xenobiotics	Xanthine Metabolism	34390	LC/MS Pos Early	100001396	1350	167.056	552-62-5	68374	61660	C16353	HMDB01991	1721121	345425	613335	897903	179891	214889	2644254	449820	2432319	152562	1778144	788863	862118	172338	1783811	265824	367576	994689	1657737	1850766	152562	257416	202877	566832	219927	1227779	1256915	2013102	851330	461323	1194128	390908	152562	431473	294568	582791
4005	caffeine	Xenobiotics	Xanthine Metabolism	569	LC/MS Pos Early	849	2106	195.088	58-08-2	2519	2424	C07481	HMDB01847	29137352	42484356	28383296	36588968	12953077	43178776	27424228	69527616	46706864	323058	2085982	2419192	72834560	64862224	6983557	646553	3081698	56070588	34351044	86561104	2237822	9178198	21727568	45331404	2870894	9017114	14902259	108954296	72531776	16463662	26857868	934360	323058	13465707	42486644	20389036
4006	paraxanthine	Xenobiotics	Xanthine Metabolism	18254	LC/MS Neg	100000453	2279	179.057	611-59-6	4687	4525	C13747	HMDB01860	2287621	3348353	3390708	5339786	976063	2214131	3753218	7668469	3056429	57791	709952	772645	4810081	4588114	1577823	439533	723845	5404166	2759627	7657829	620121	1453141	1797966	1676646	530608	3681297	2355190	8634432	4977279	2027164	4220406	276847	57791	2357546	4151908	2512140
4007	theobromine	Xenobiotics	Xanthine Metabolism	18392	LC/MS Pos Early	100000445	1600	181.072	83-67-0	5429	5236	C07480	HMDB02825	180527312	9472113	15564876	35241212	24075160	13221122	92536184	37809164	90790752	3626495	96952544	61682612	38462788	17110264	103496672	14008070	10461217	41895192	77588272	89931376	8523823	29172356	17611662	72843288	23395360	19701290	70604376	181019664	38269568	33635728	55774764	68770912	819282	58713964	22363320	27425736
4008	theophylline	Xenobiotics	Xanthine Metabolism	18394	LC/MS Neg	100000437	2356.9	179.057	58-55-9	2153	2068	C07130	HMDB01889	3069051	2882377	4007771	3743452	1347165	2677307	3906707	8393547	2775774	190277	723698	1083620	3930981	5065533	1815229	506881	625683	4404777	3474324	9742942	450791	1593481	2459049	4424873	518039	3434132	2640916	7439135	4802881	2939762	4717072	190277	190277	2664023	4117936	1881853
[truncated: 17 more columns]
